# Supplementary material for: Using SXRF and LA-ICP-TOFMS to Explore Evidence of Treatment and Physiological Responses to Leprosy in Medieval Denmark
Source: MDPI journal article supplement (doi:10.3390/biology12020184), 2023-01-25

# **File S3**

## **Laser Ablation (LA-ICP-TOFMS) results**

**Using SXRF and LA-ICP-TOFMS to explore evidence of treatment and physiological responses to leprosy in medieval Denmark**

## **Biology**

**Anastasia Brozou, Marcello A. Mannino, Stijn J.M. Van Malderen, Jan Garrevoet, Eric Pubert, Benjamin T. Fuller, M. Christopher Dean, Thomas Colard, Frédéric Santos, Niels Lynnerup, Jesper L. Boldsen, Marie Louise Jørkov, Andrei Dorian Soficaru, Laszlo Vincze, Adeline Le Cabec**

**Corresponding author:**

**Adeline Le Cabec**

**E-mail: [adeline.le-cabec@u-bordeaux.fr](mailto:adeline.le-cabec@u-bordeaux.fr)**

Teeth with the best SXRF signal in cellular cementum.

### Odense 533 LLM1:

The cellular cementum and the secondary dentine are also imaged with SXRF. The acellular cementum is scanned here for comparison.

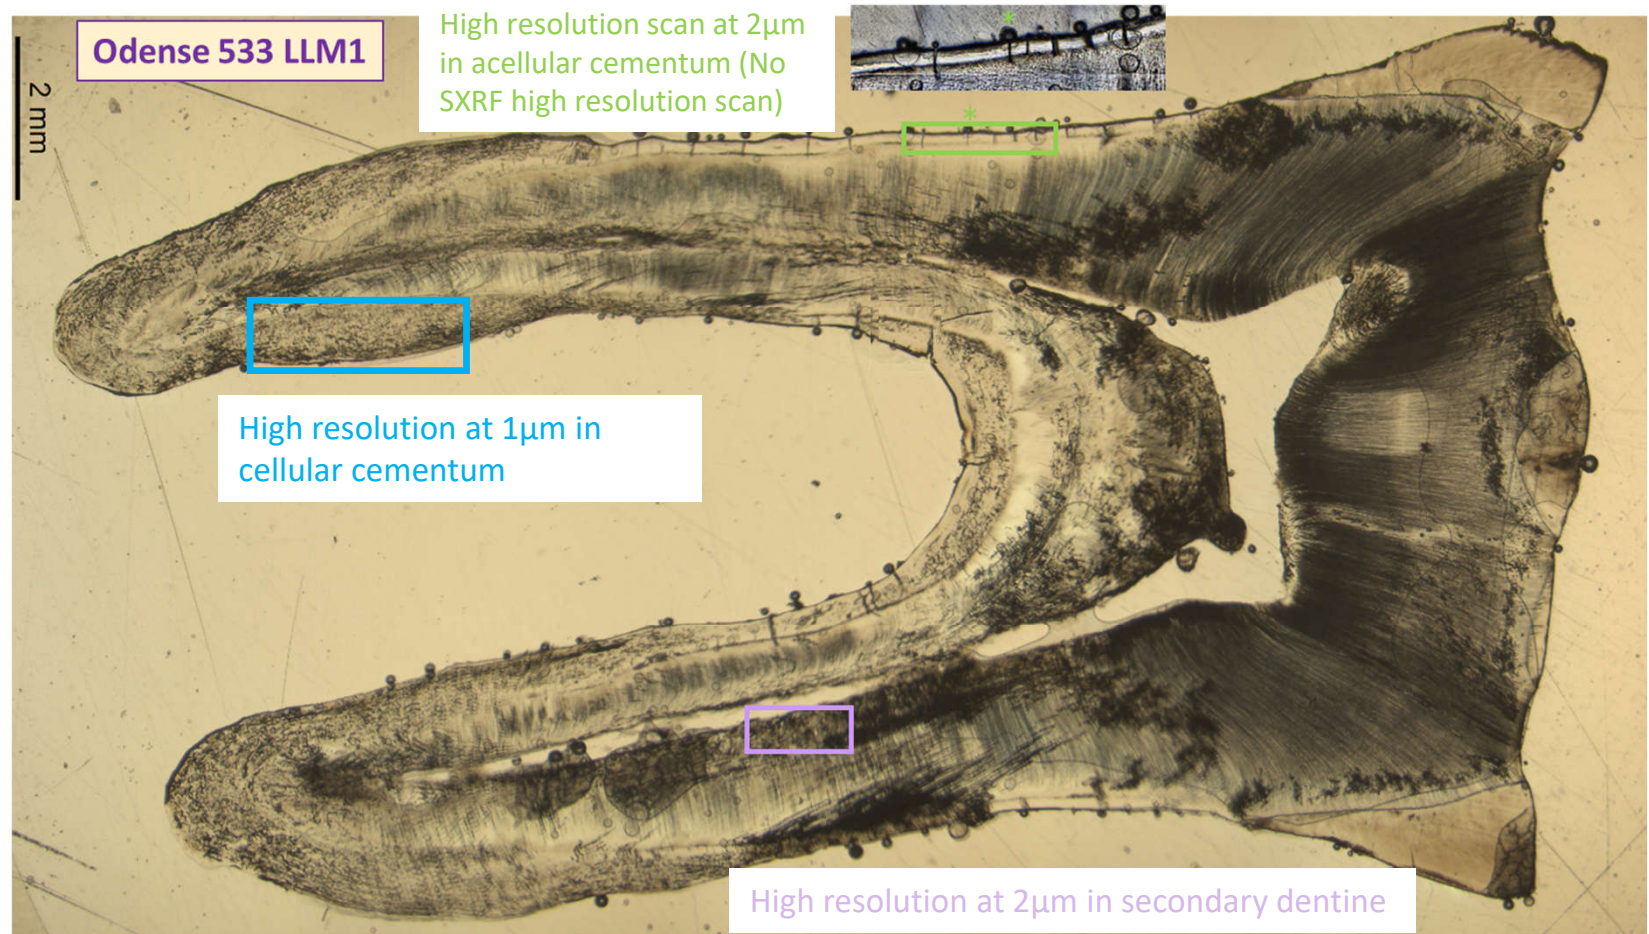

### Næstved 211 URC

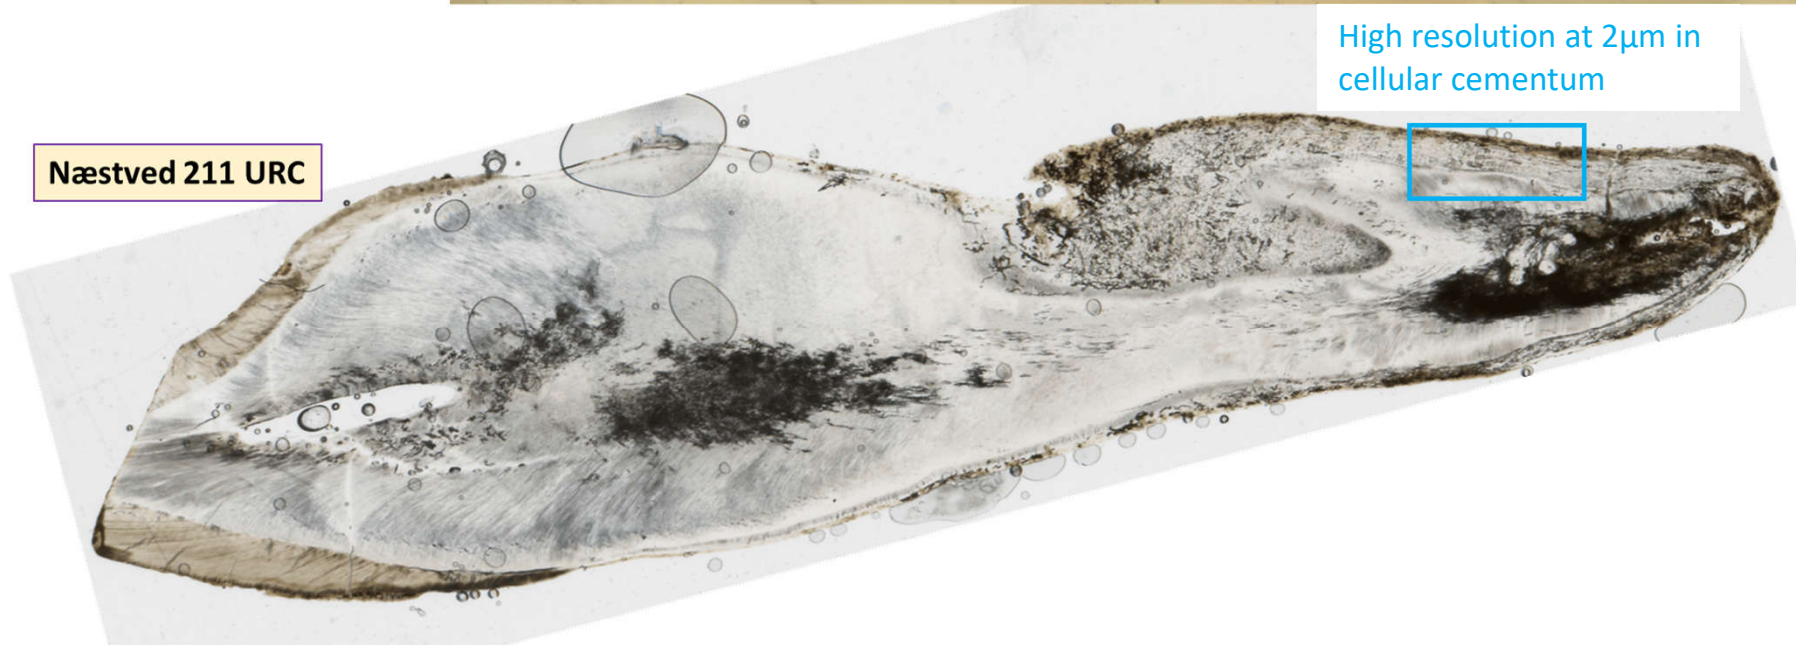



# Naestved 211 URC – Cellular Cementum

Gauss 0.8 x 0.8

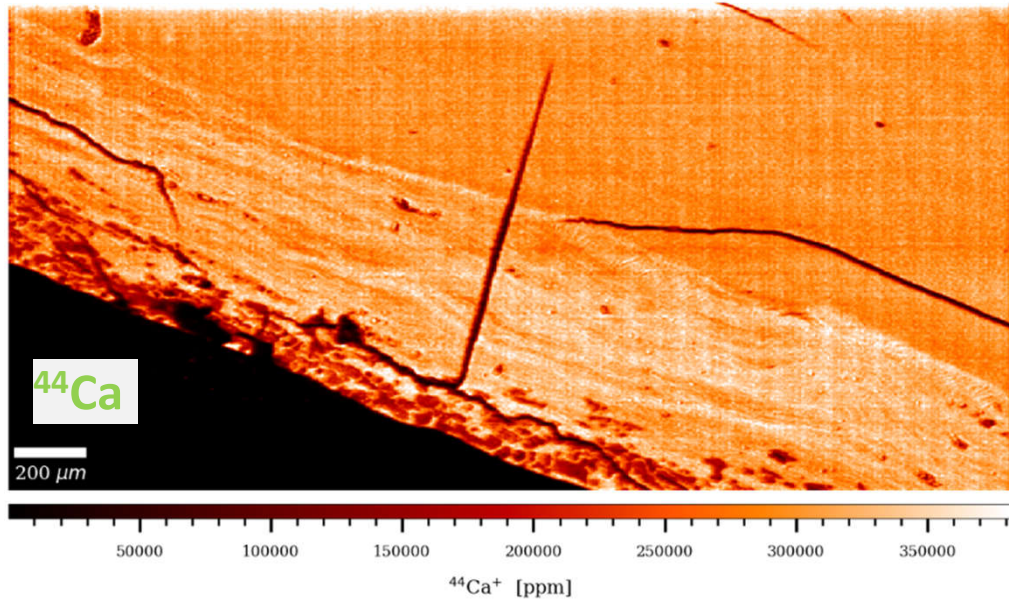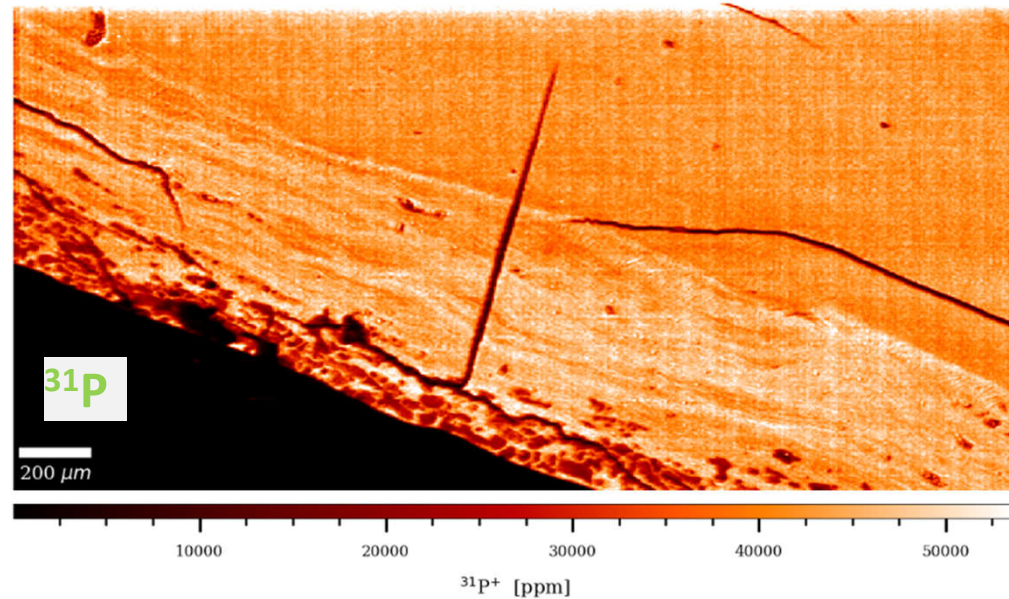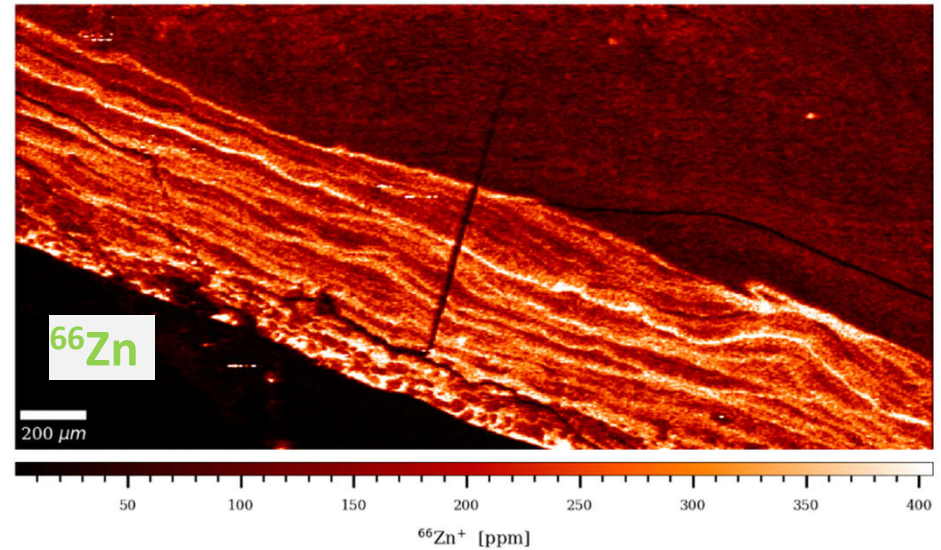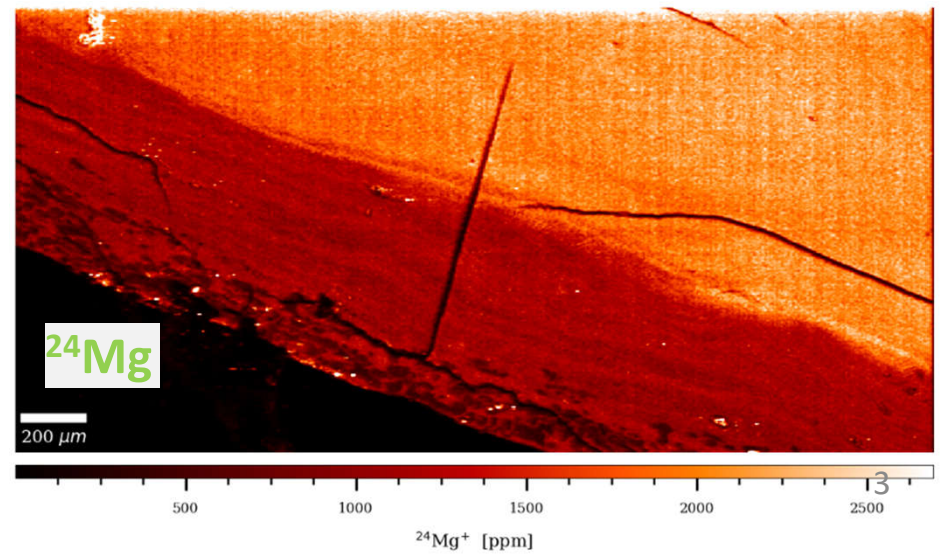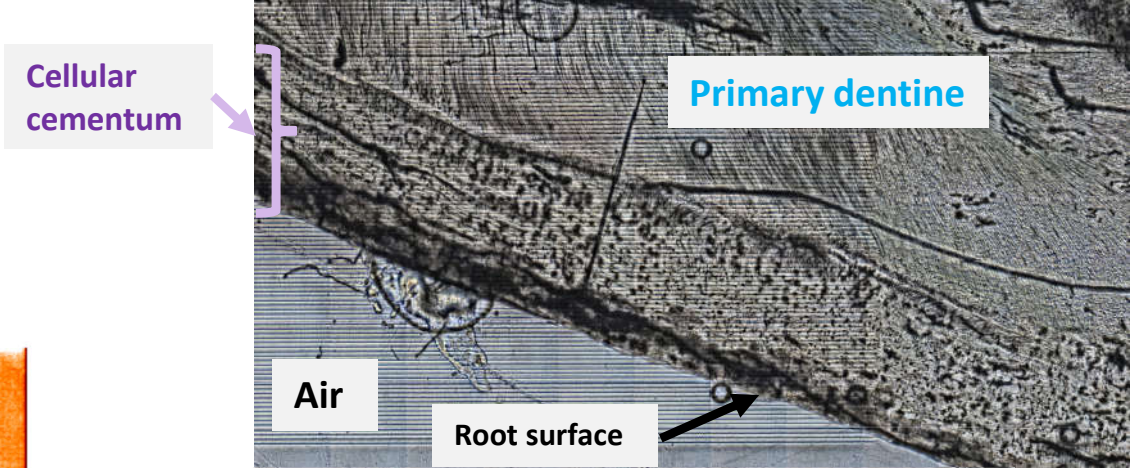



# Næstved 211C – Cellular Cementum

$^{23}\text{Na}$

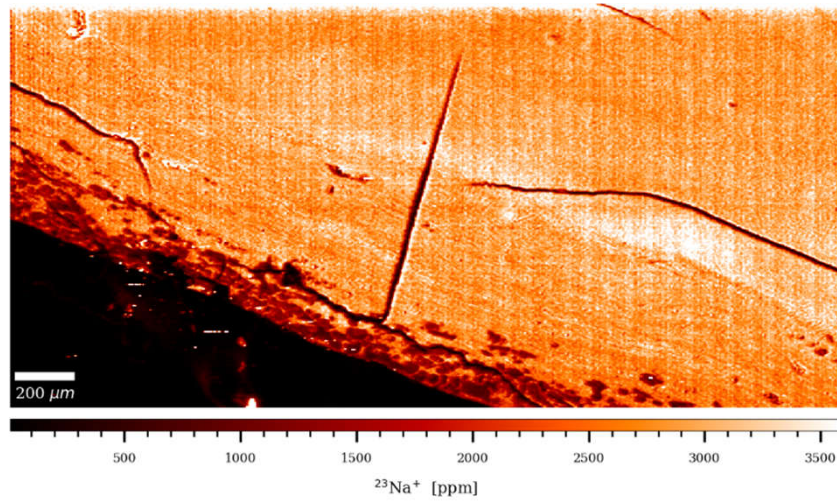

$^{63}\text{Cu}$

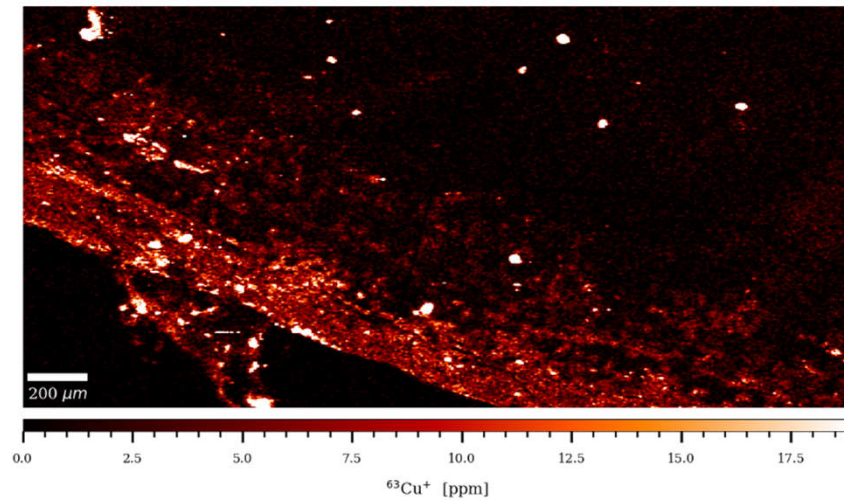

$^{138}\text{Ba}$

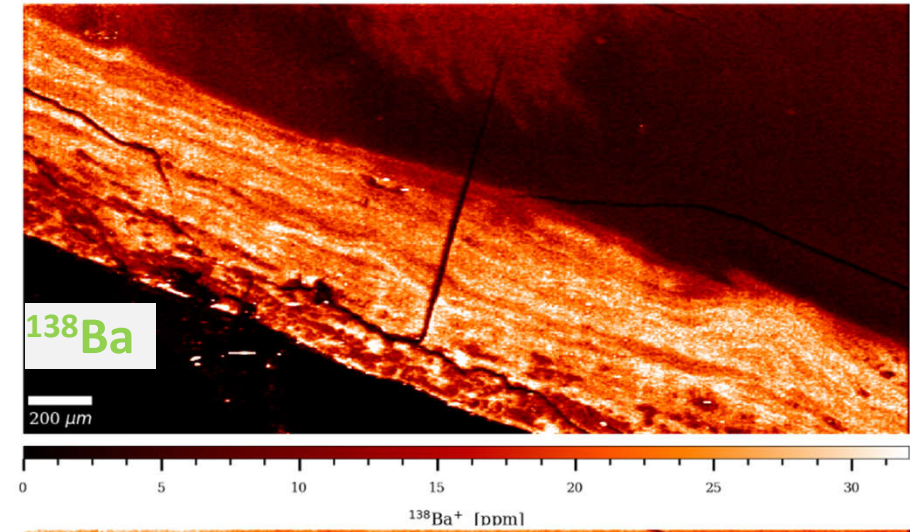

$^{88}\text{Sr}$

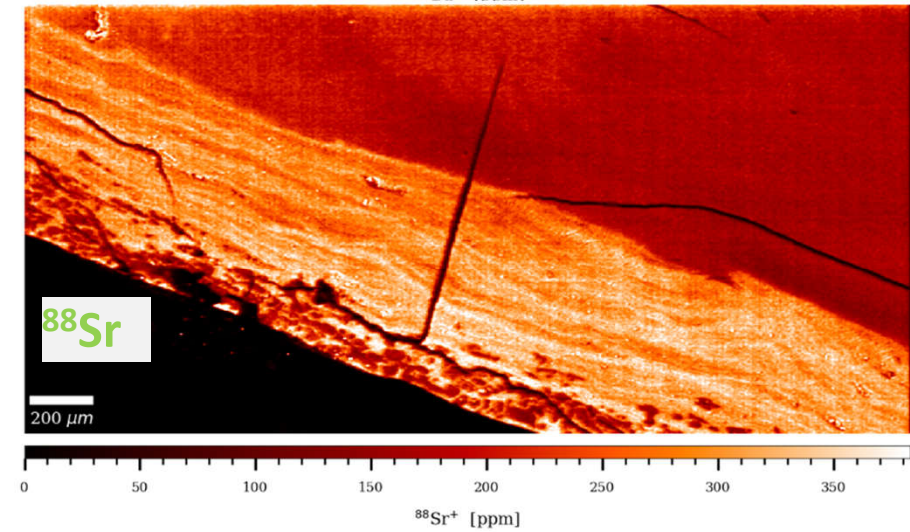

$^{56}\text{Fe}$

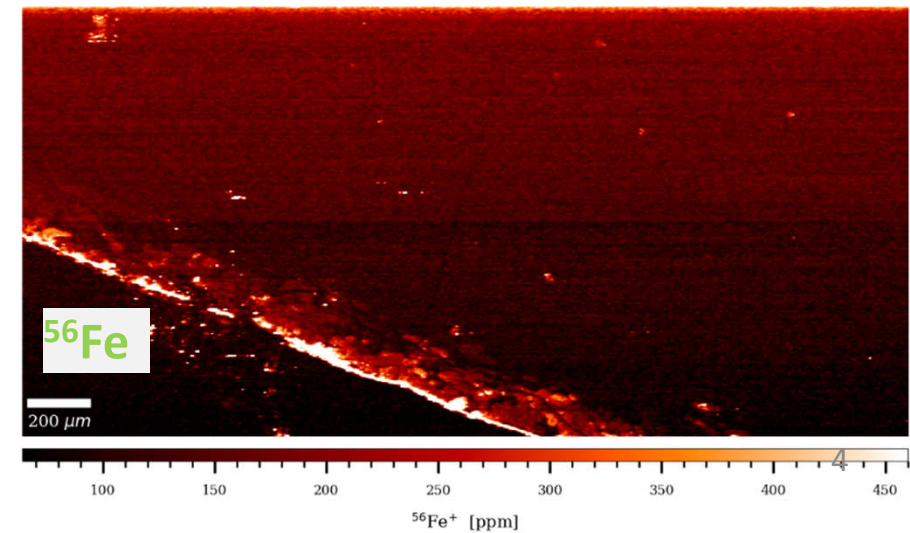



# Næstved 211C – Cellular Cementum

$^{75}\text{As}$

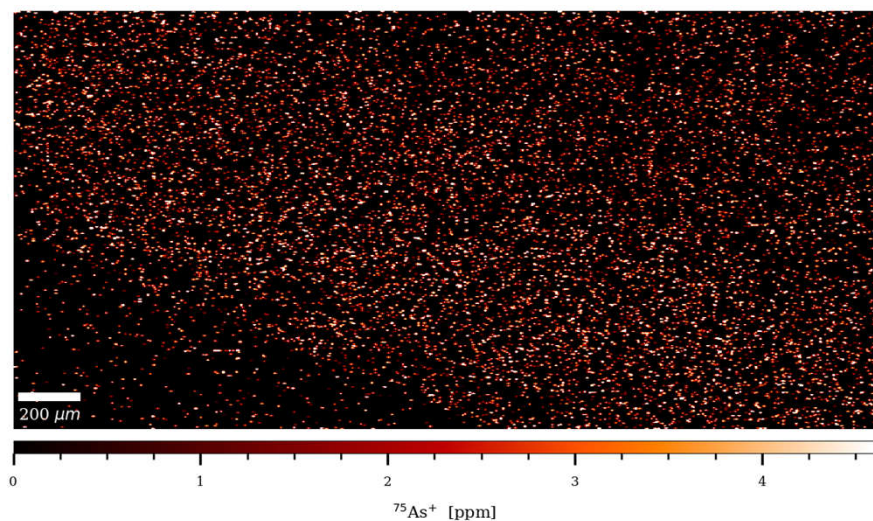

$^{55}\text{Mn}$

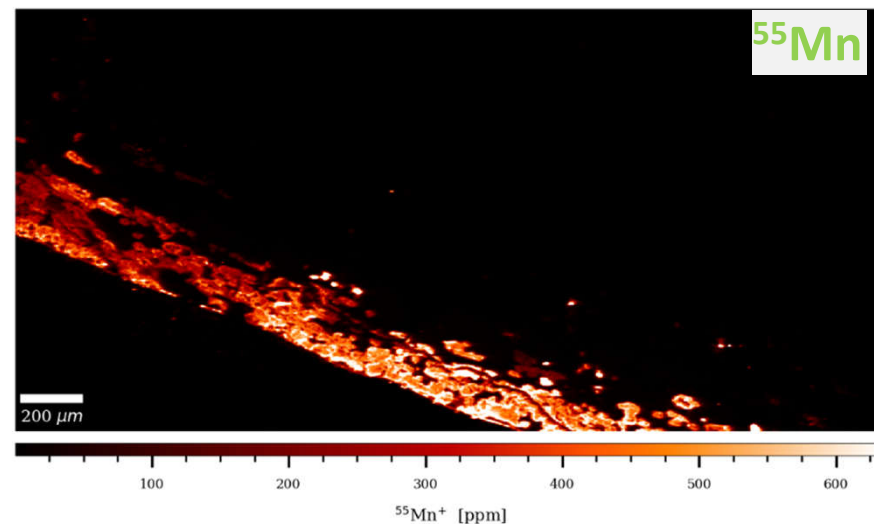

$^{202}\text{Hg}$

No detectable  
mercury

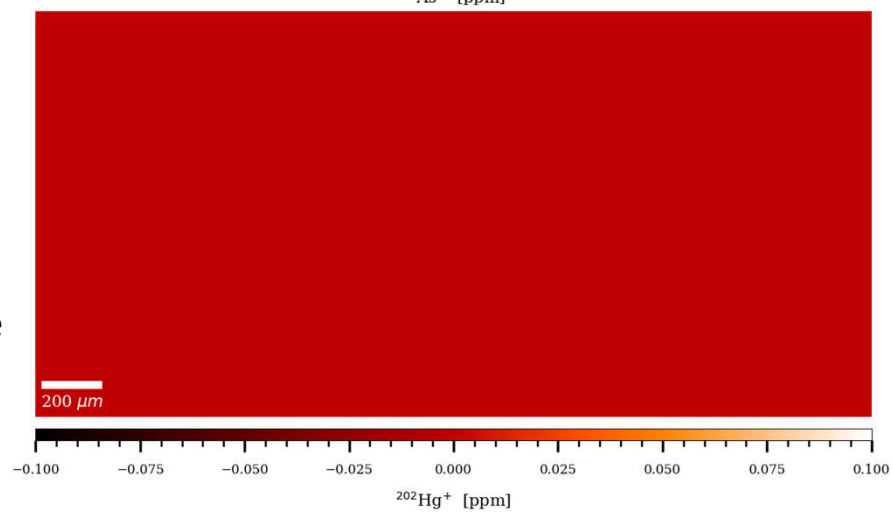

$^{208}\text{Pb}$

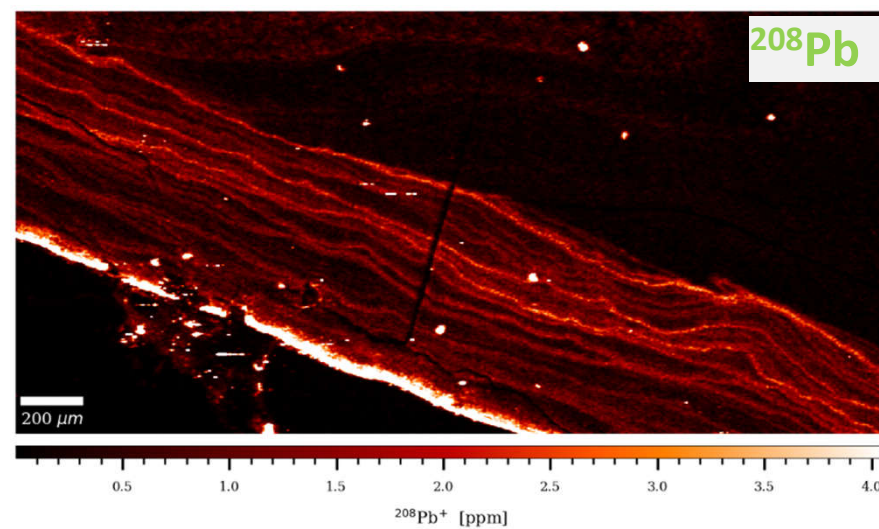



# Odense 533 LLM1 – Cellular Cementum

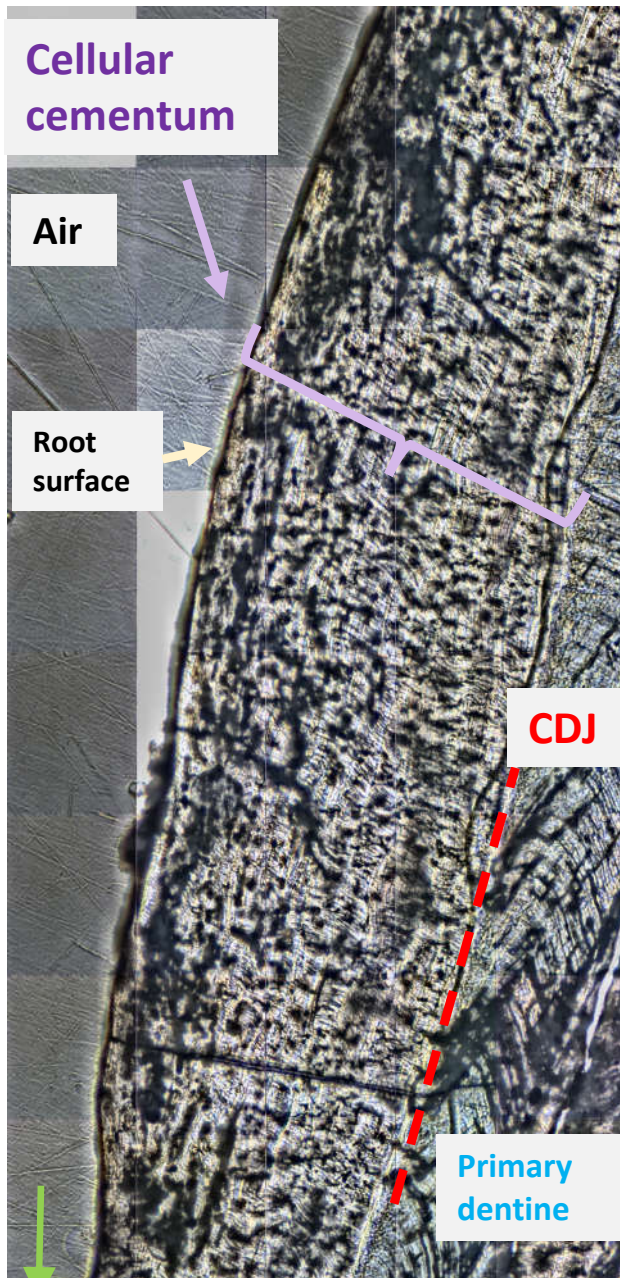

<sup>44</sup>Ca

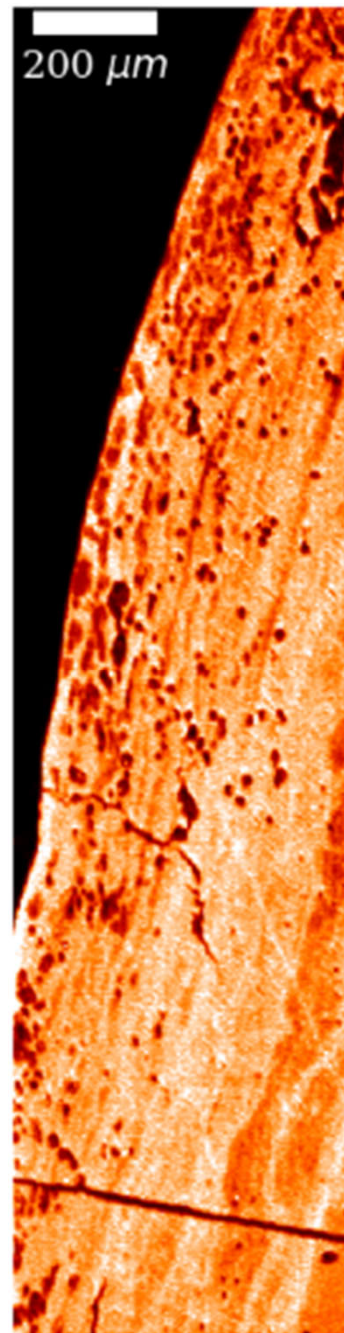

<sup>31</sup>P

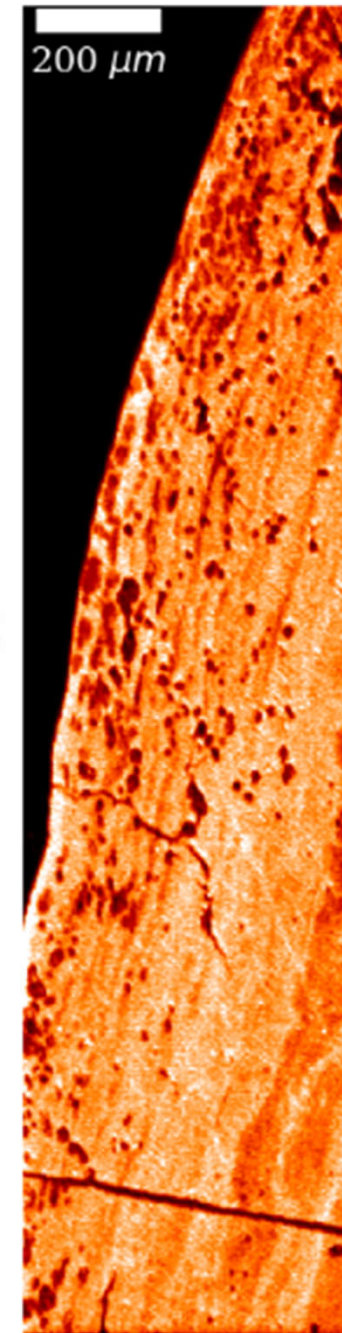

Towards root apex

Gauss 0.9 x 0.9



# Odense 533M – Cellular Cementum

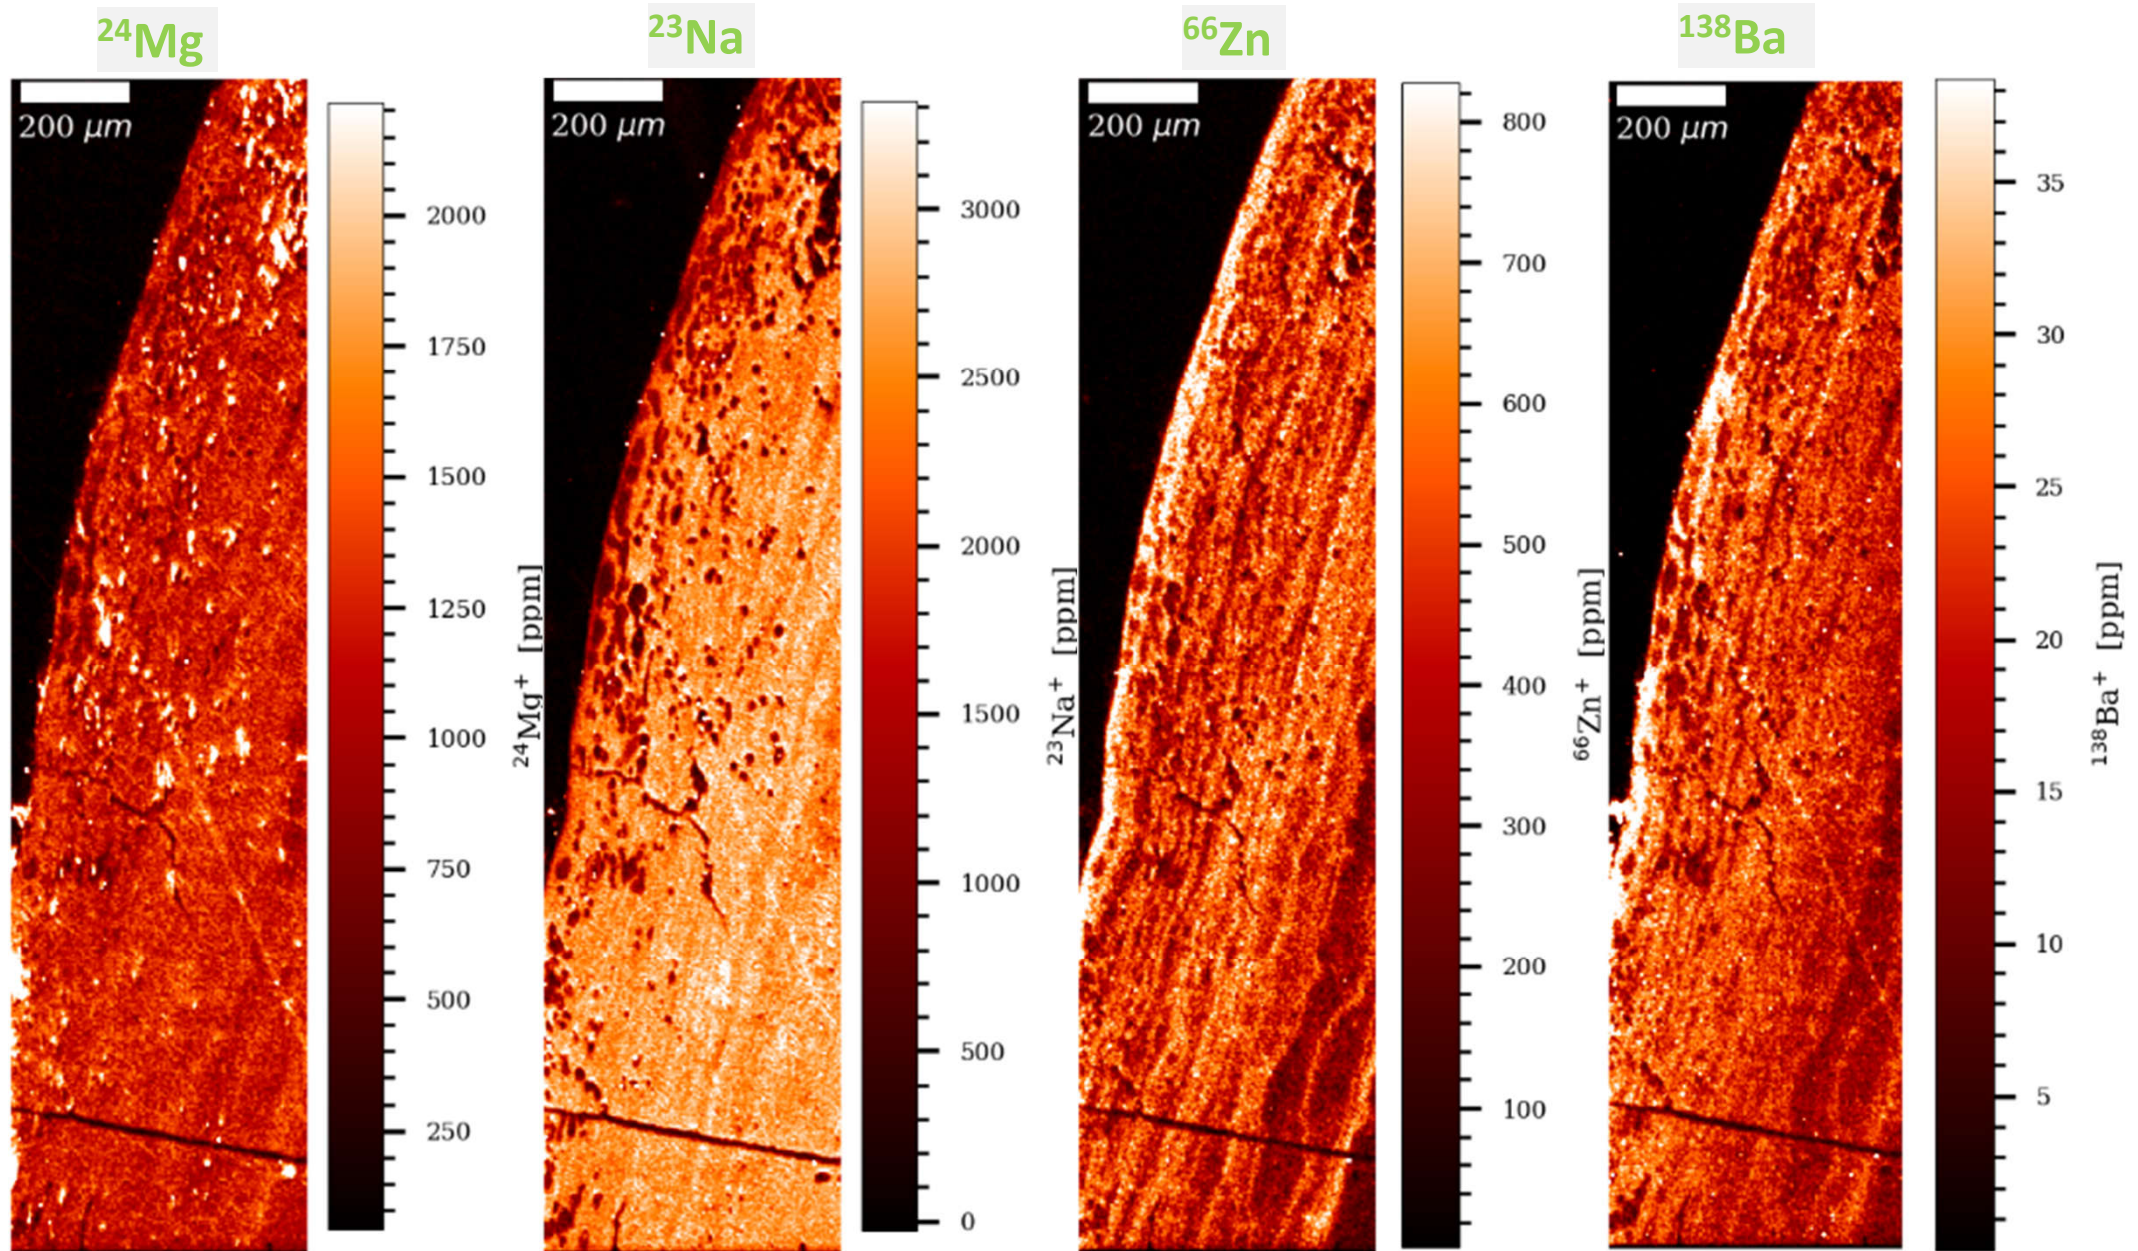



# Odense 533M – Cellular Cementum

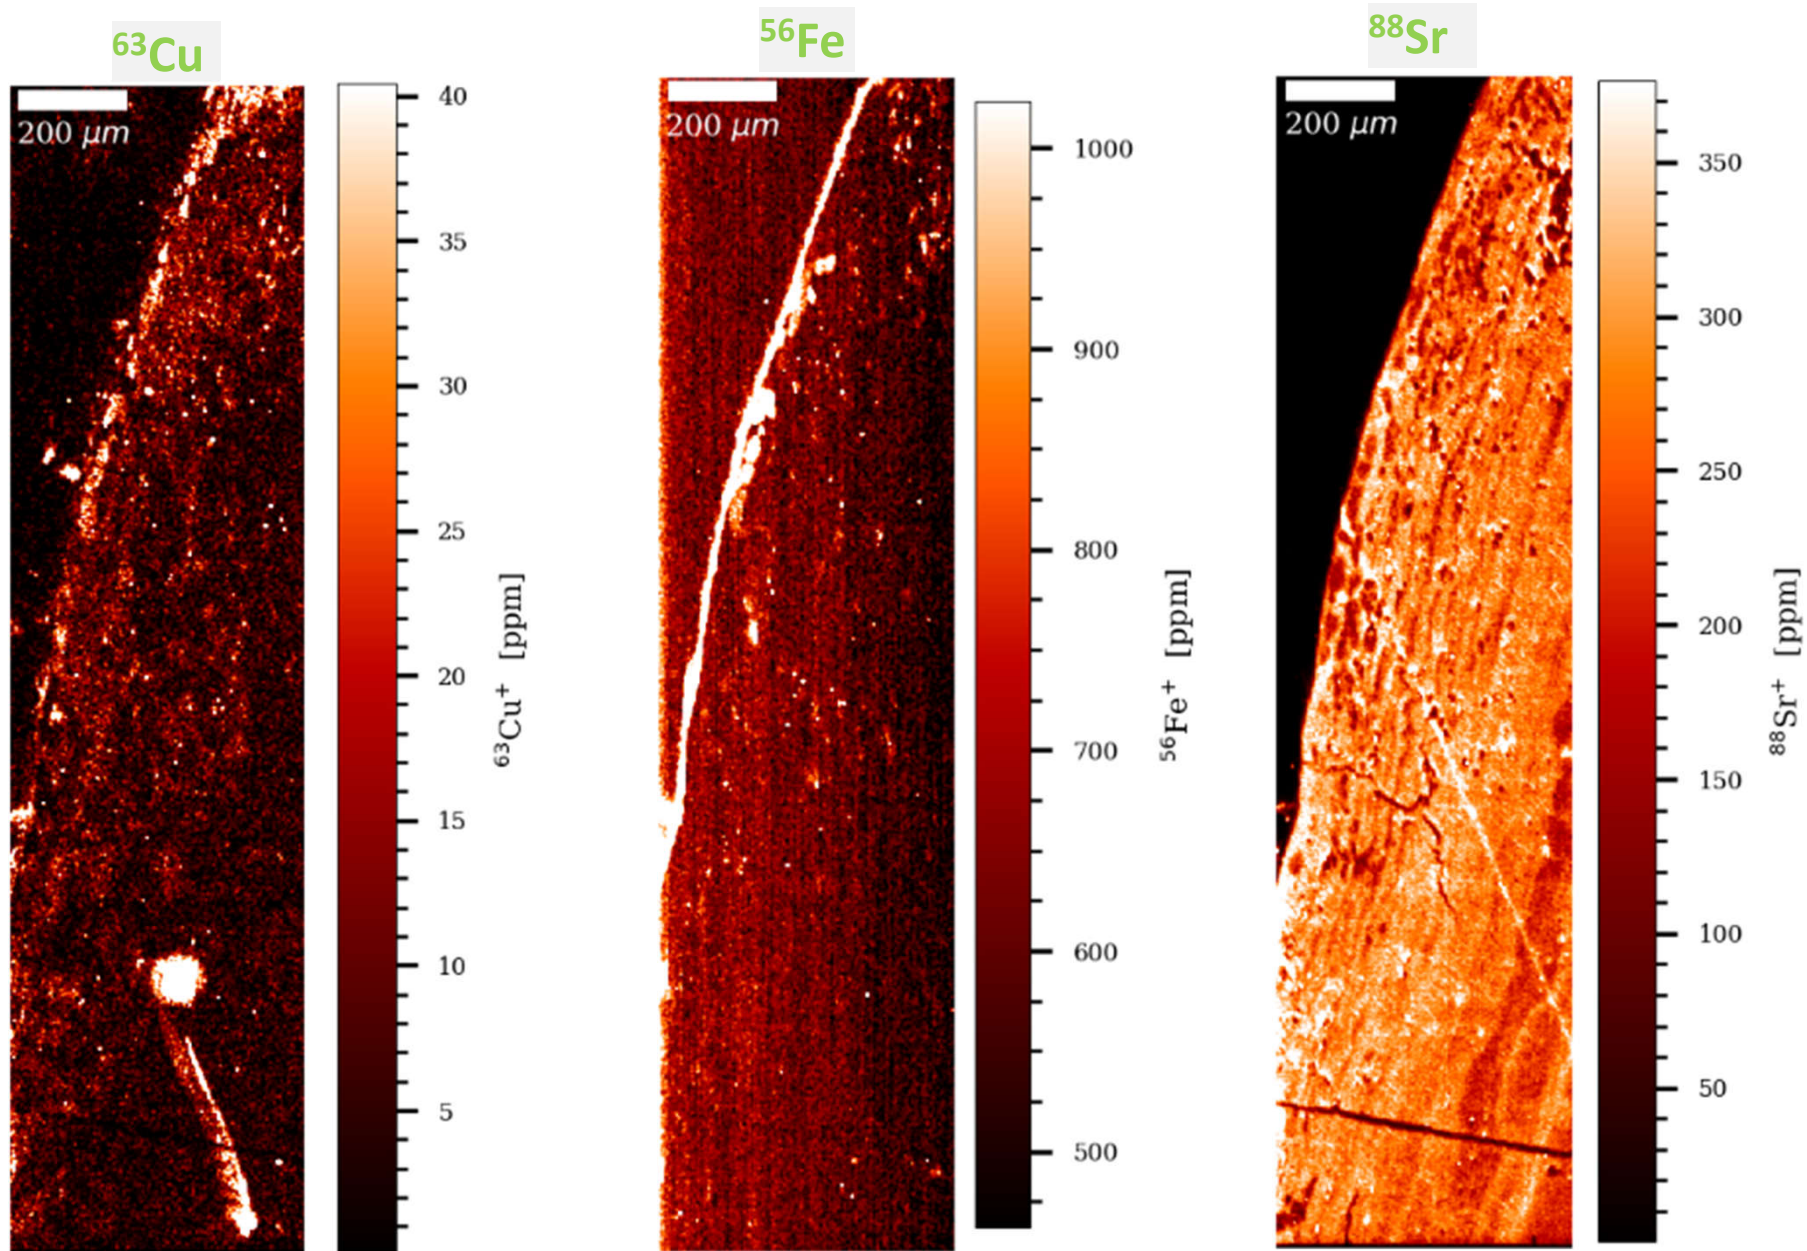



# Odense 533M – Cellular Cementum

No detectable mercury or arsenic

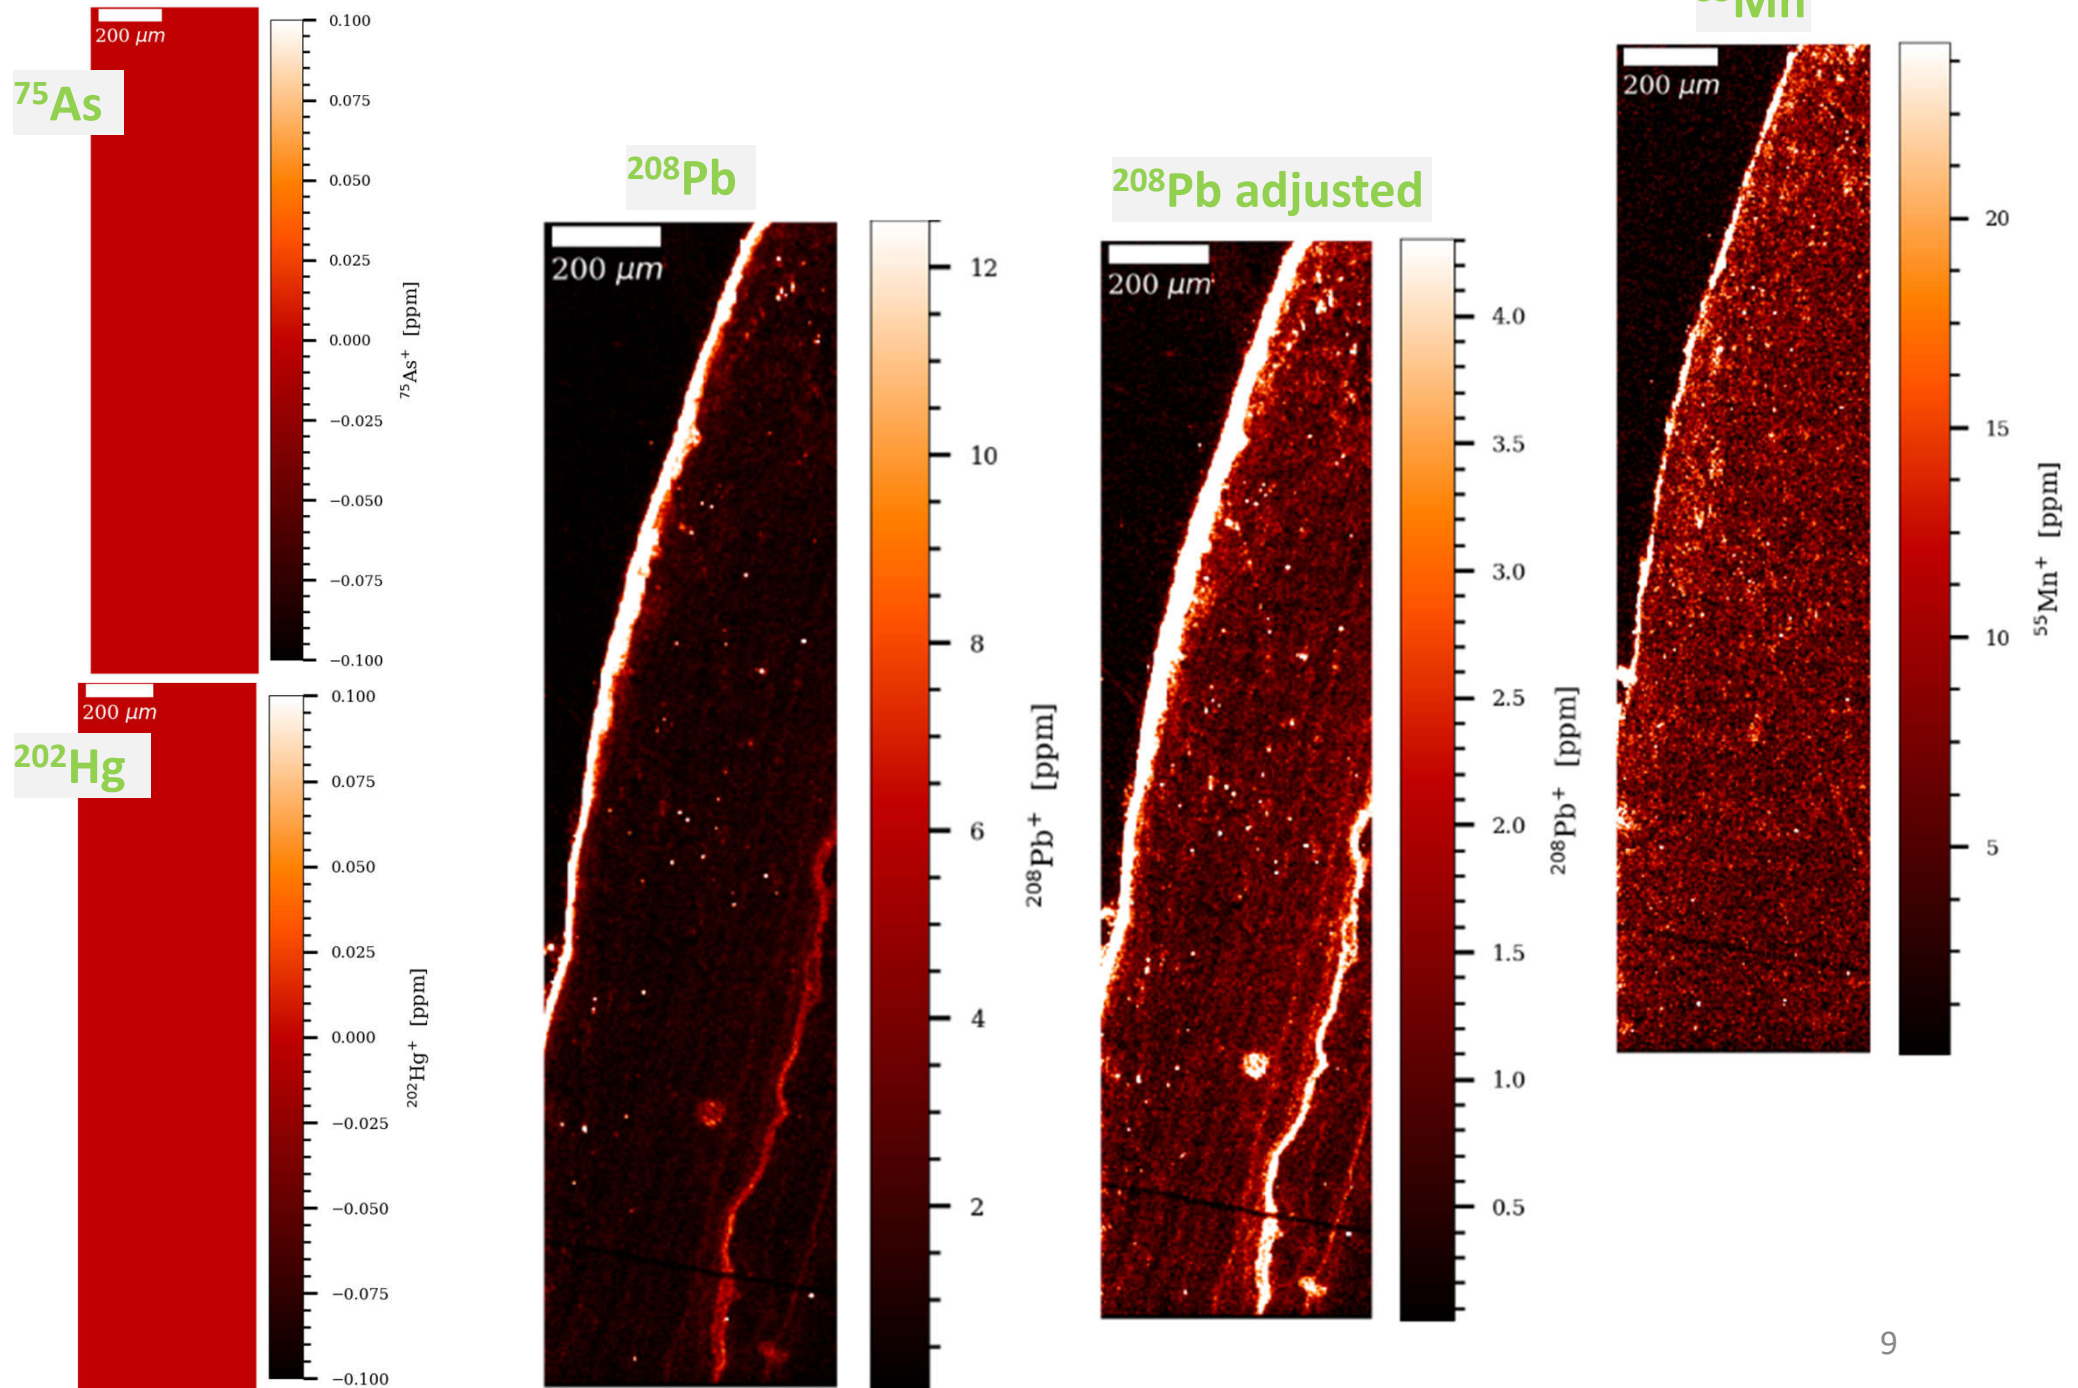



# Odense 533 LLM1 –

Gauss 0.8 x 0.8

## Acellular Cementum

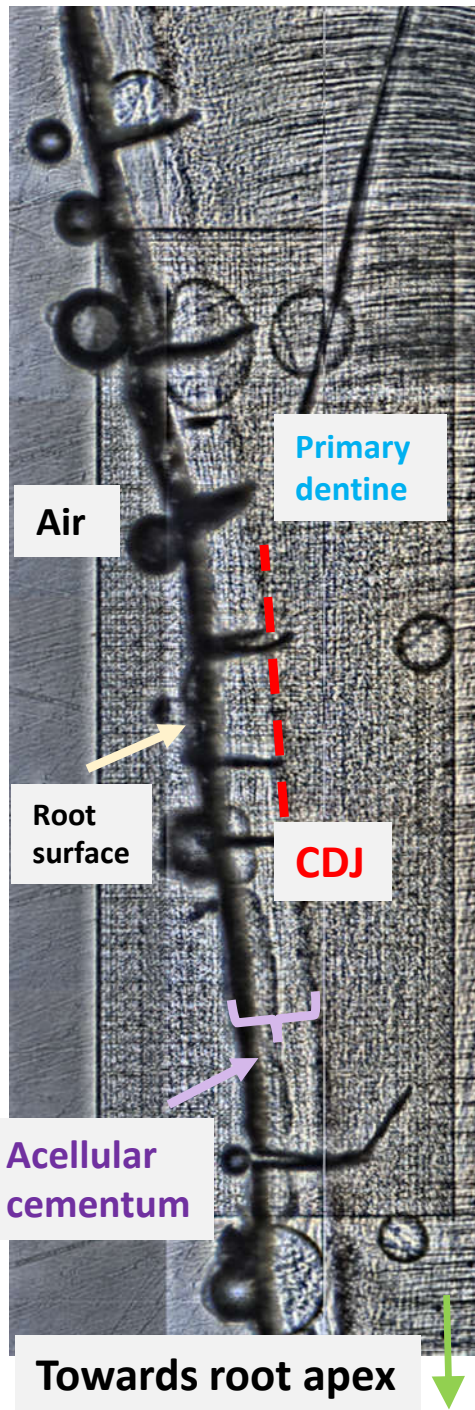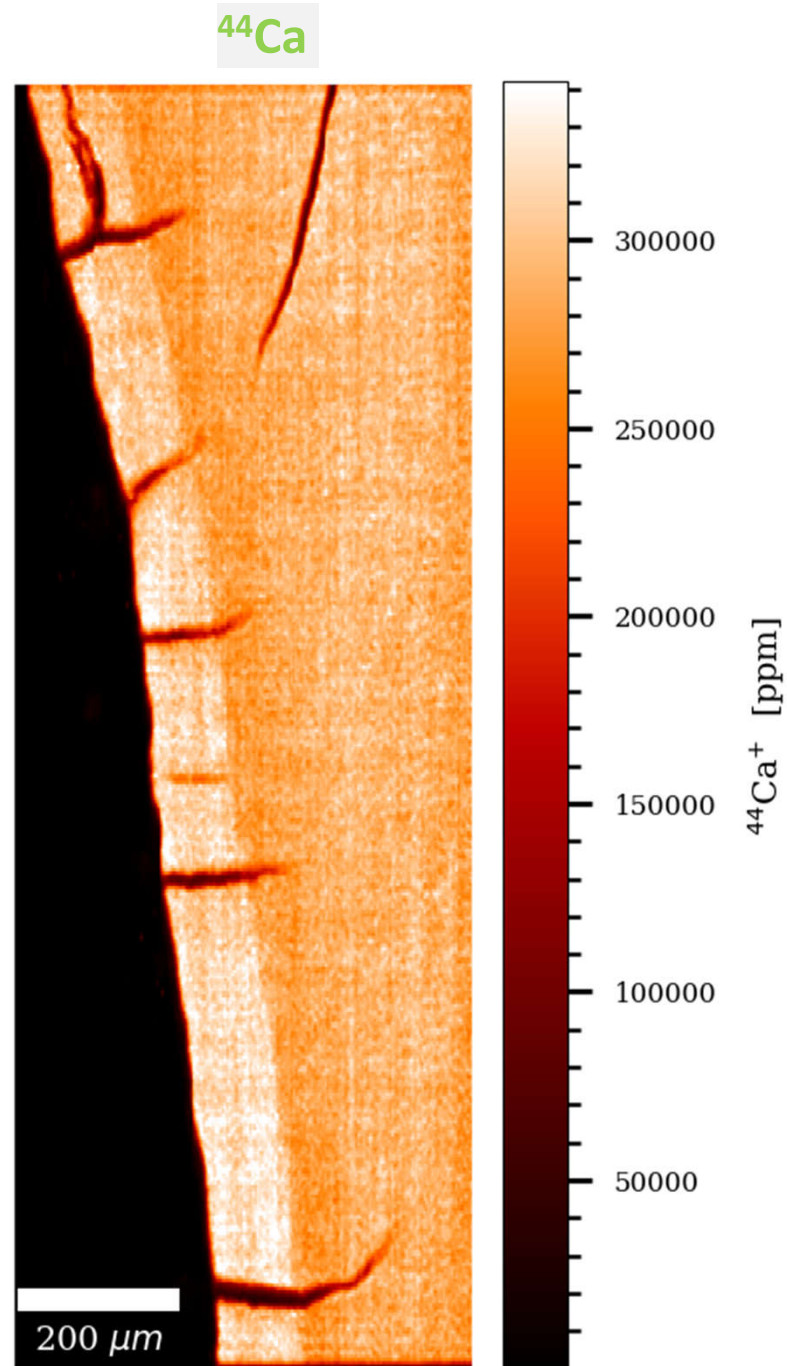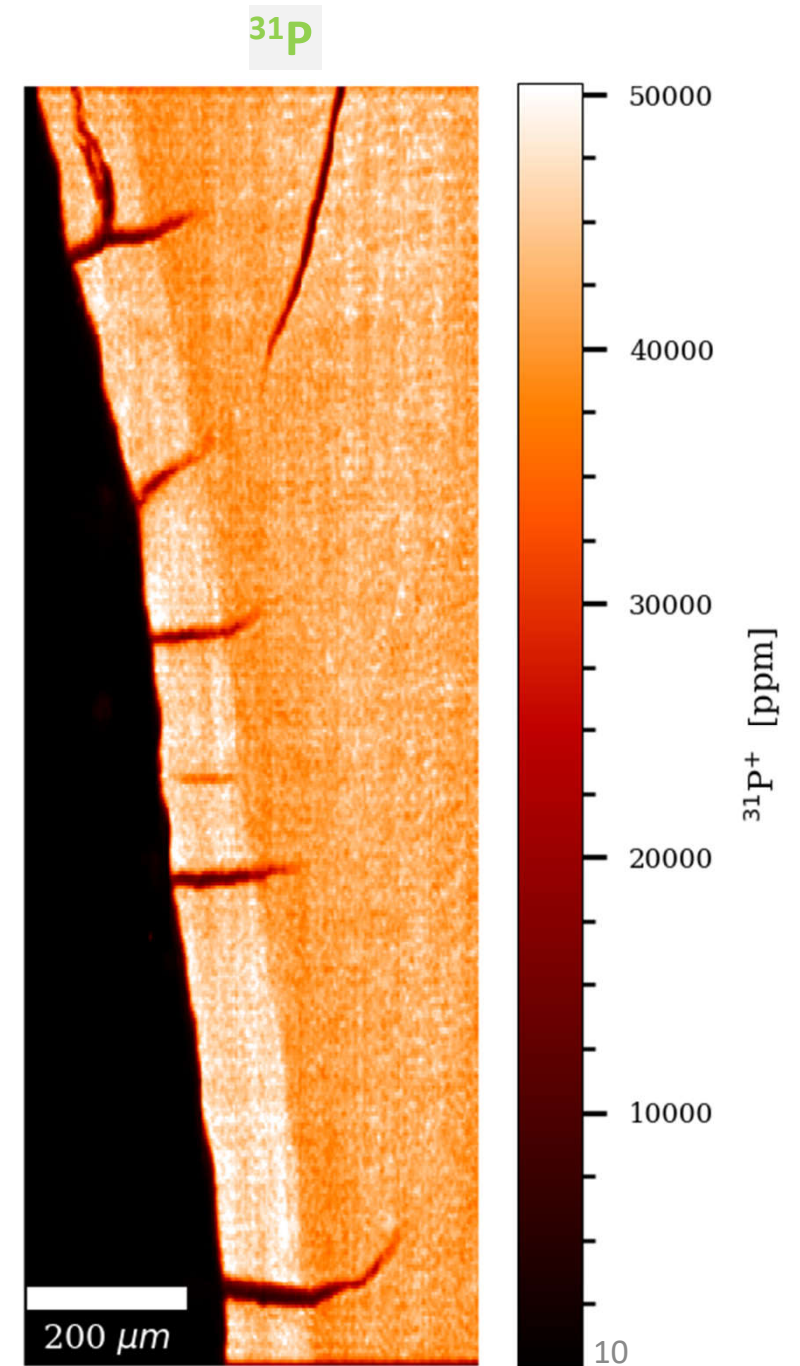



# Odense 533M – Acellular Cementum

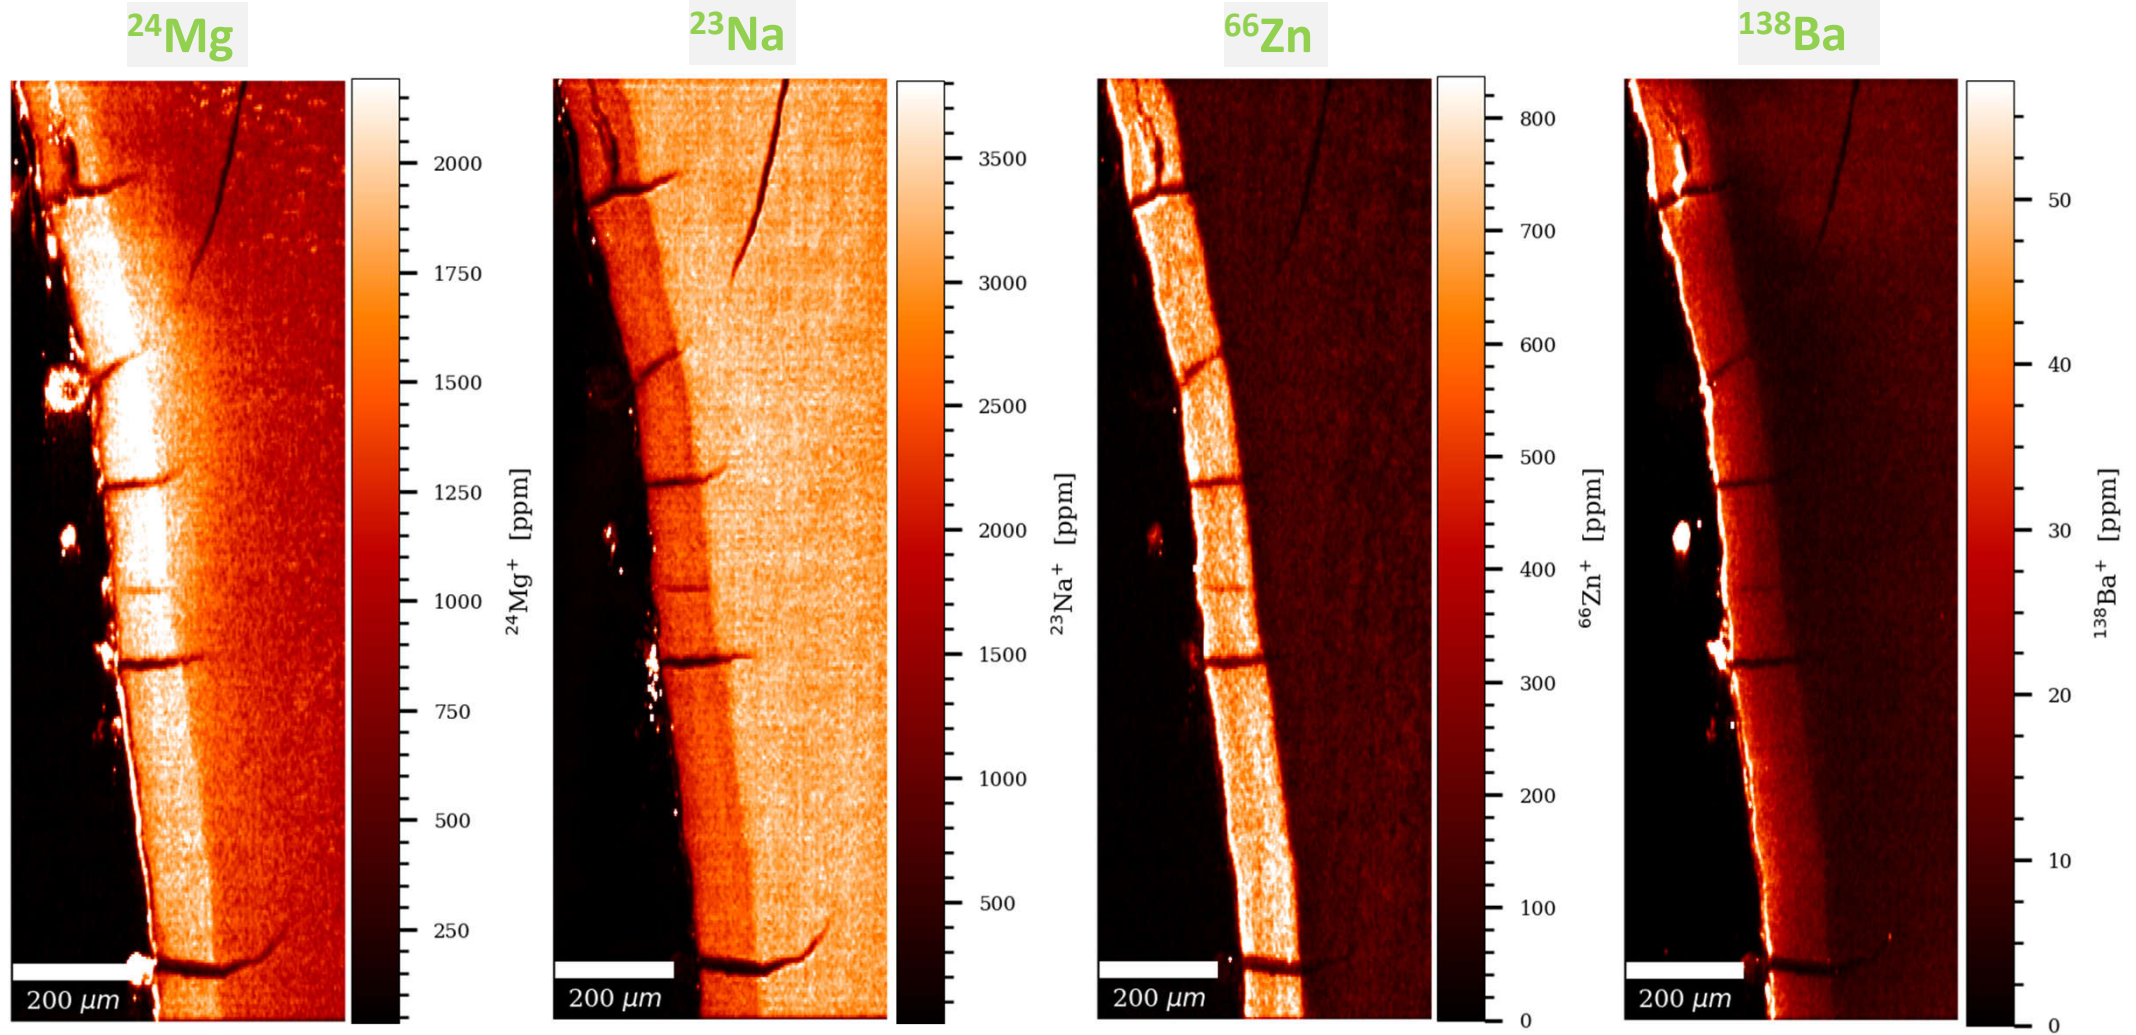



# Odense 533M – Acellular Cementum

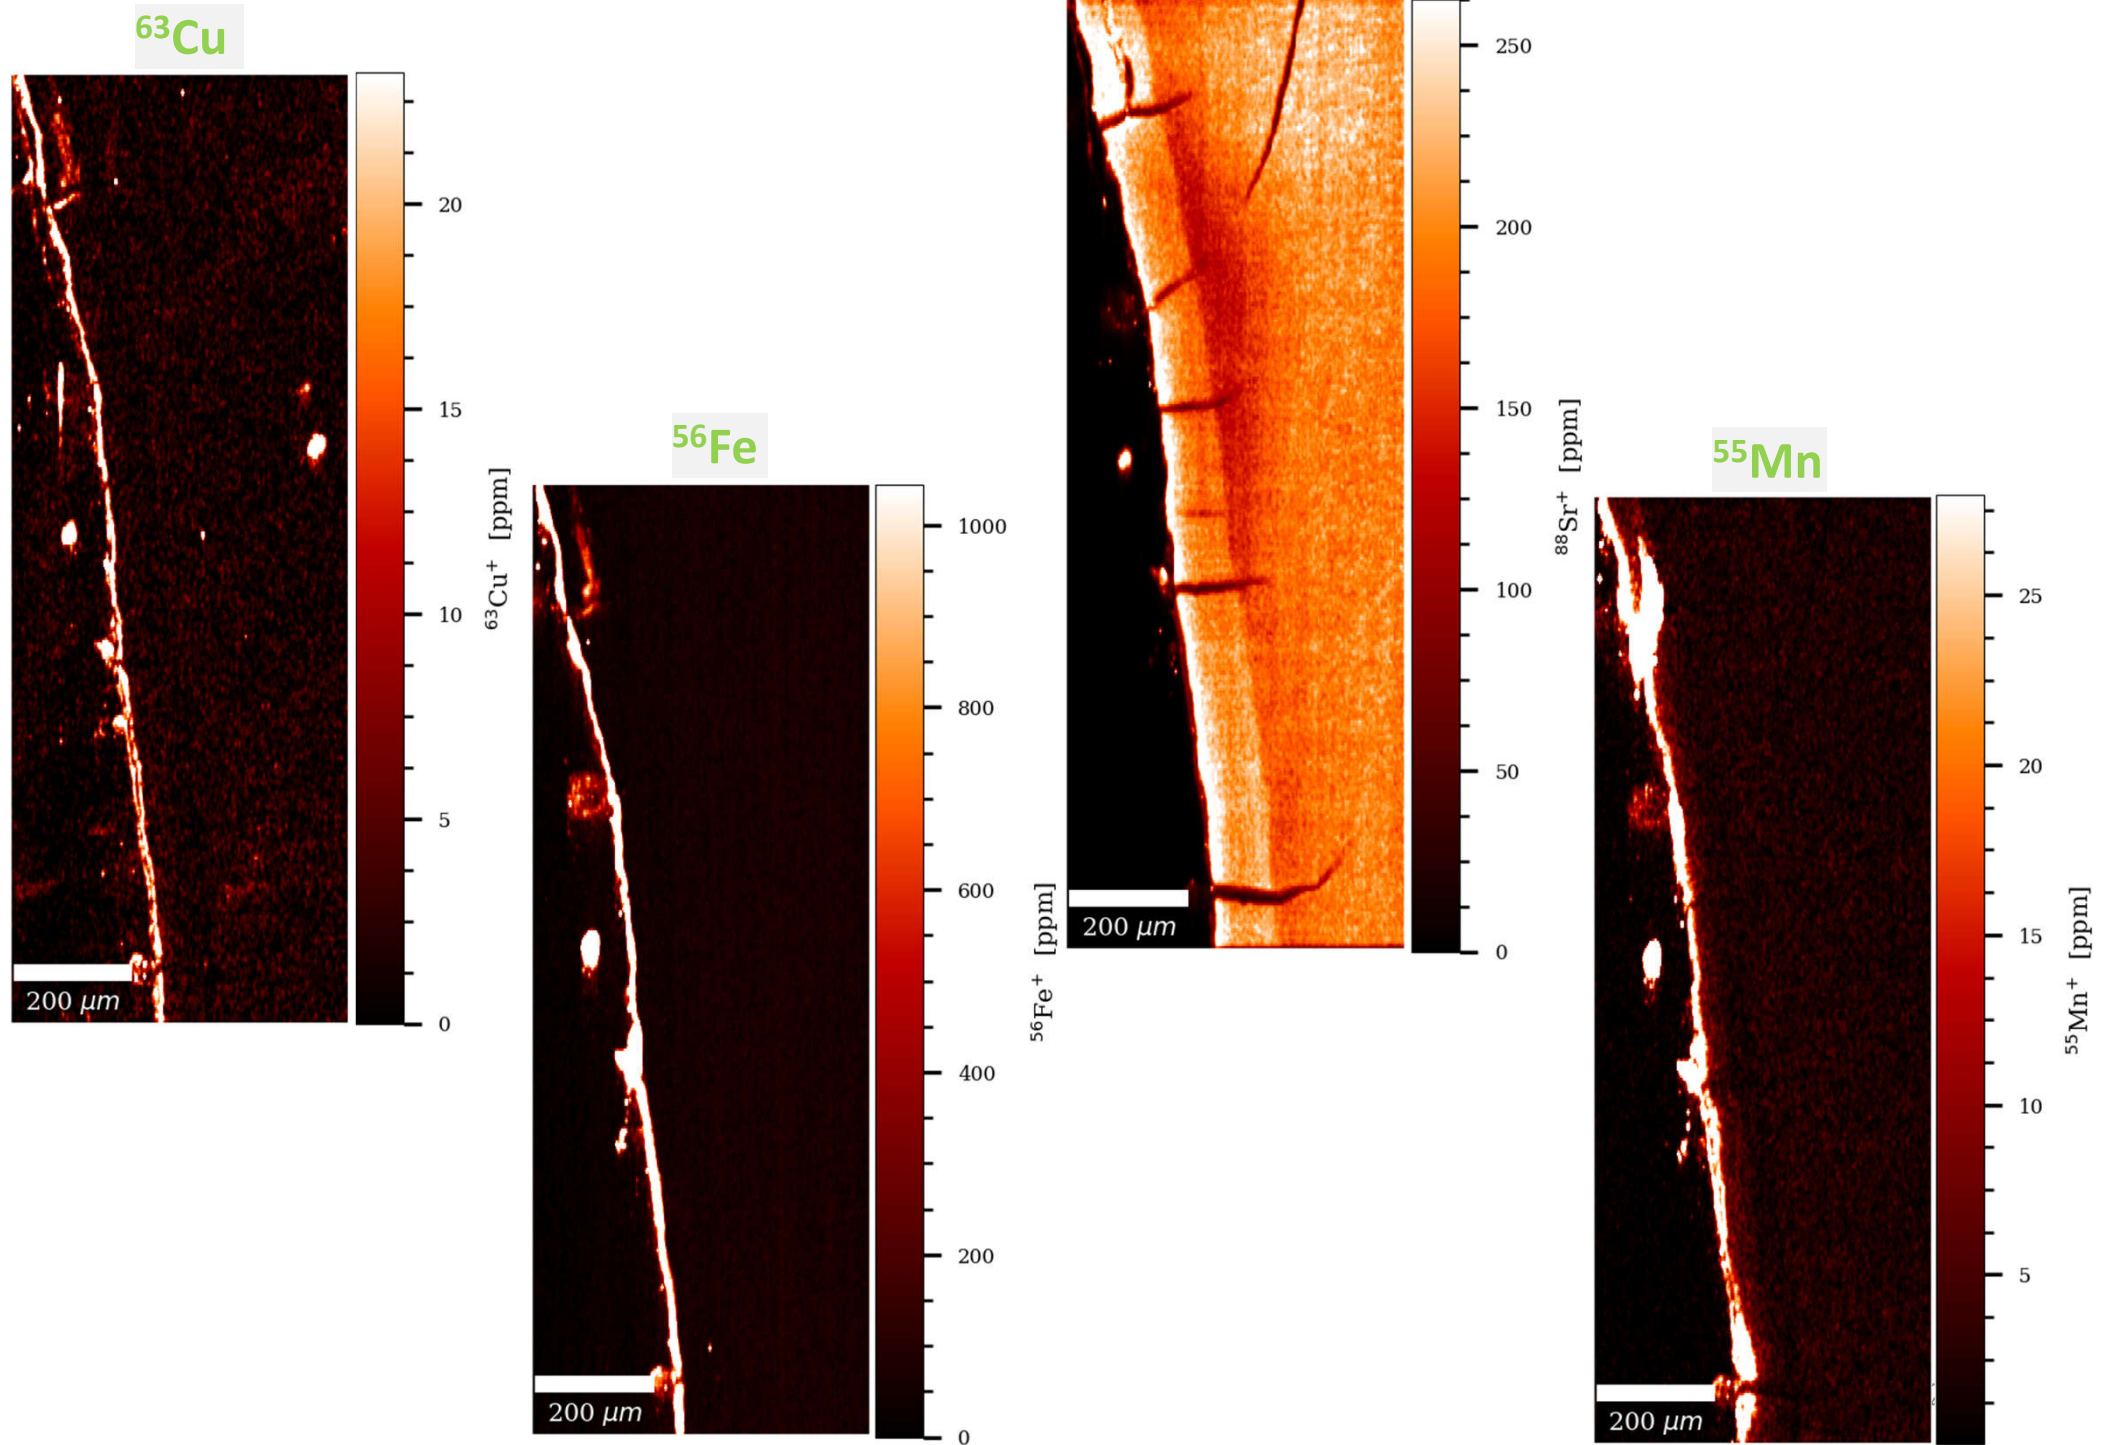



# Odense 533M – Acellular Cementum

$^{75}\text{As}$

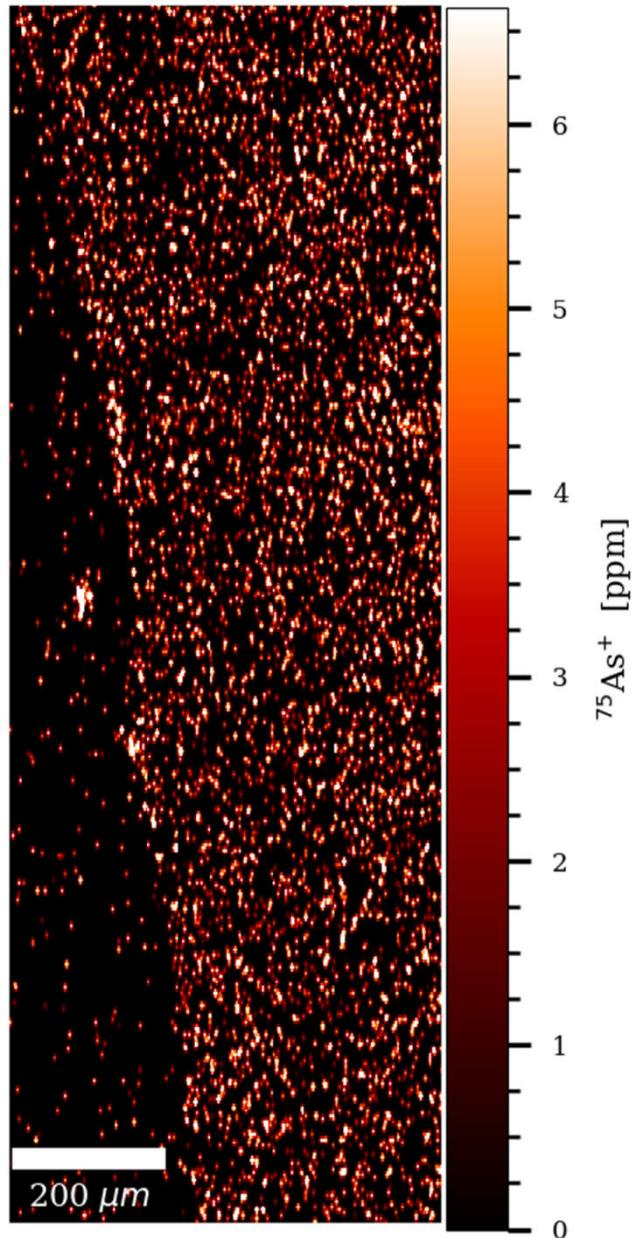

$^{202}\text{Hg}$

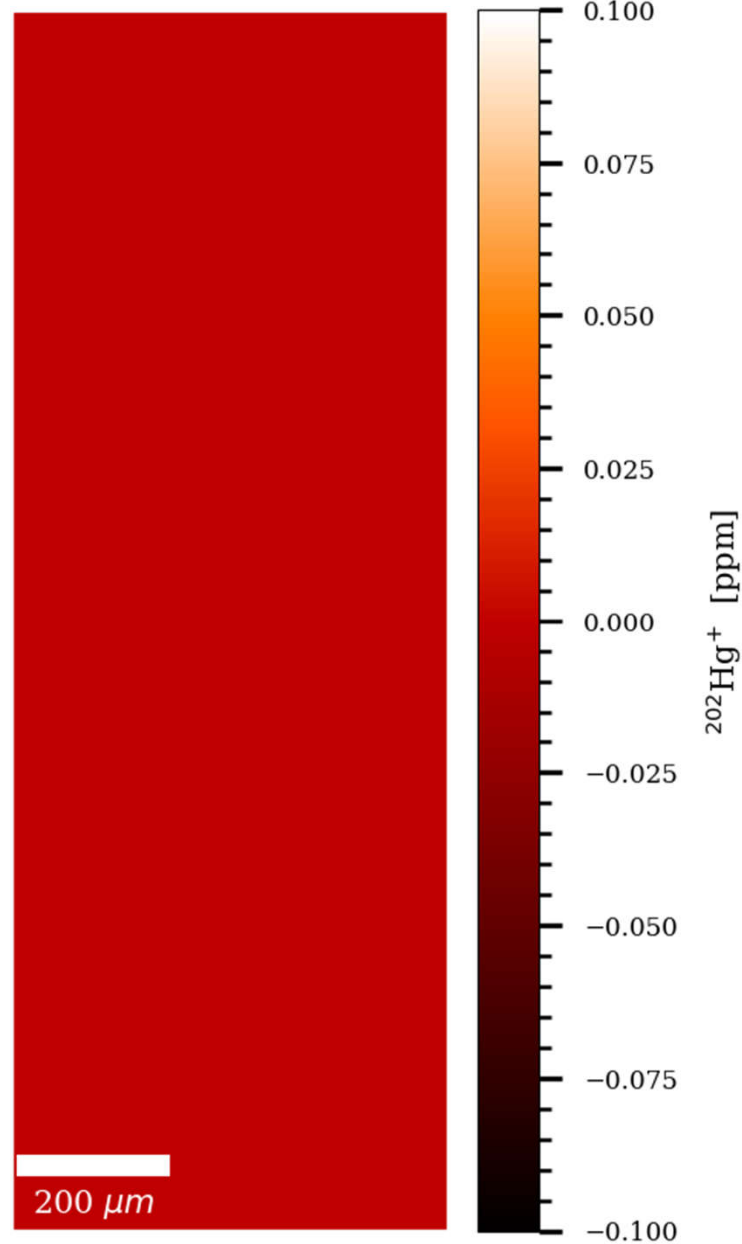

No detectable mercury

$^{208}\text{Pb}$

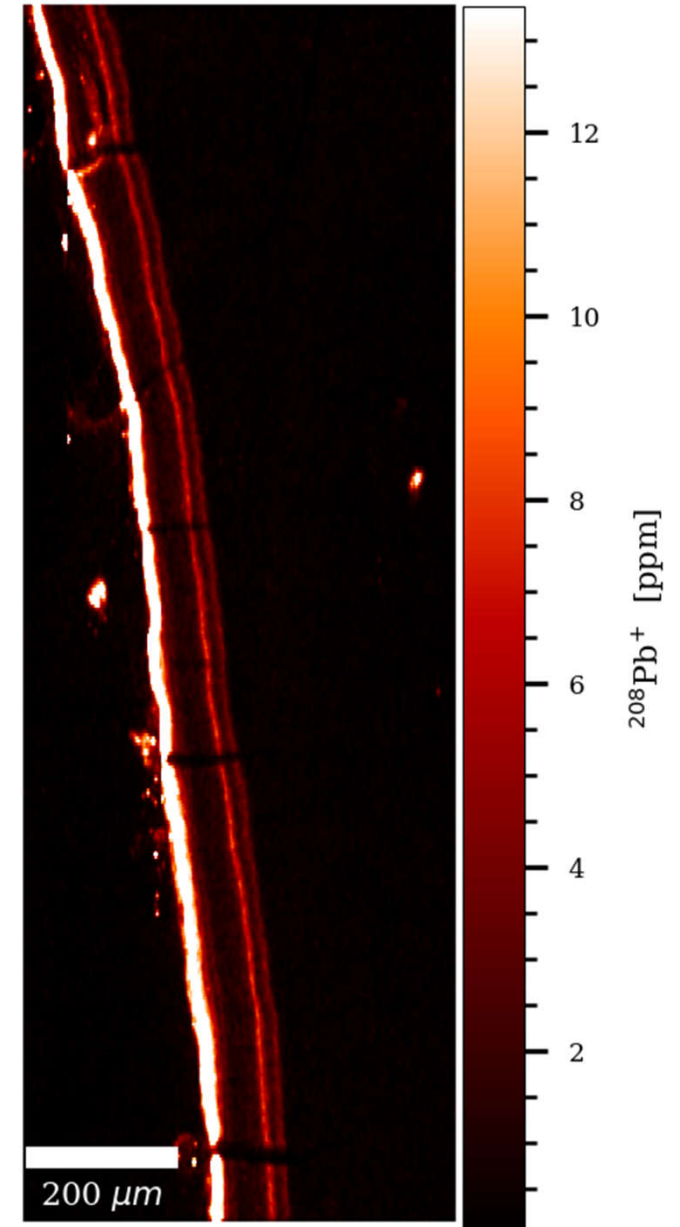



## Secondary Dentine

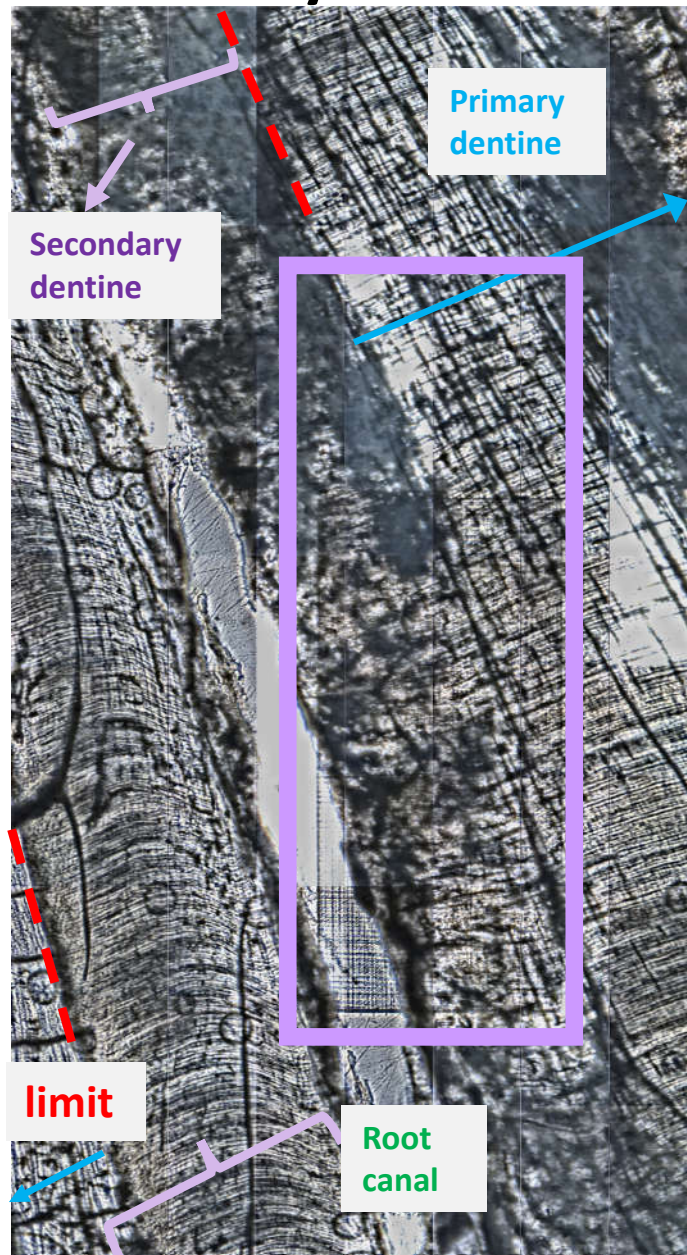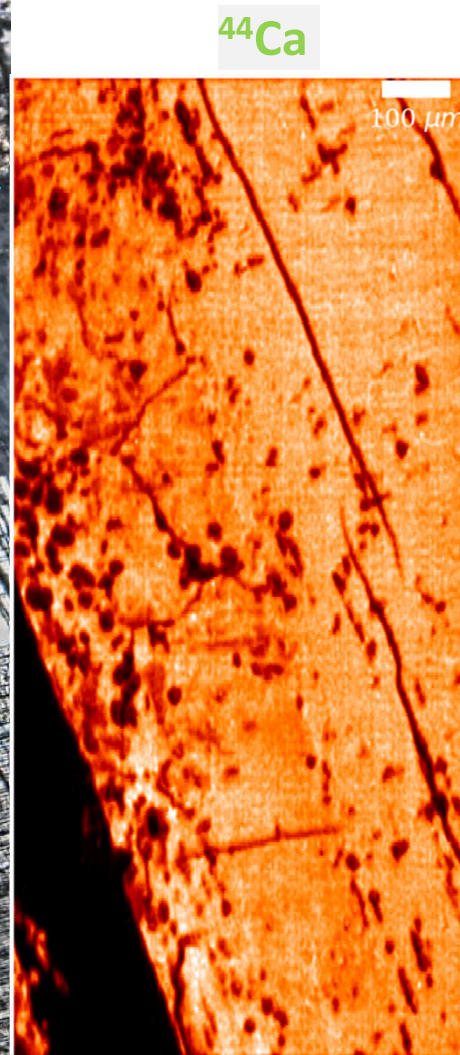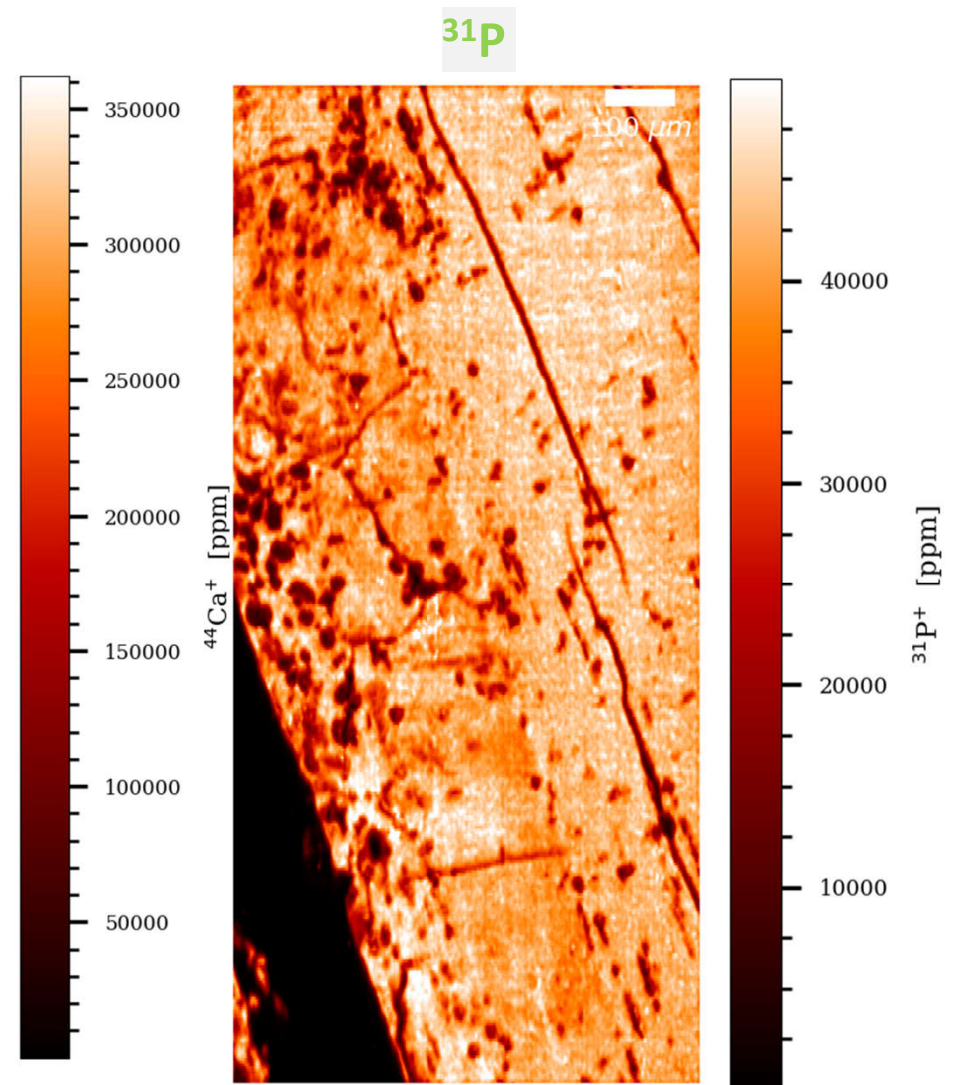

Towards root apex



# Odense 533M – Secondary Dentine

$^{66}\text{Zn}$

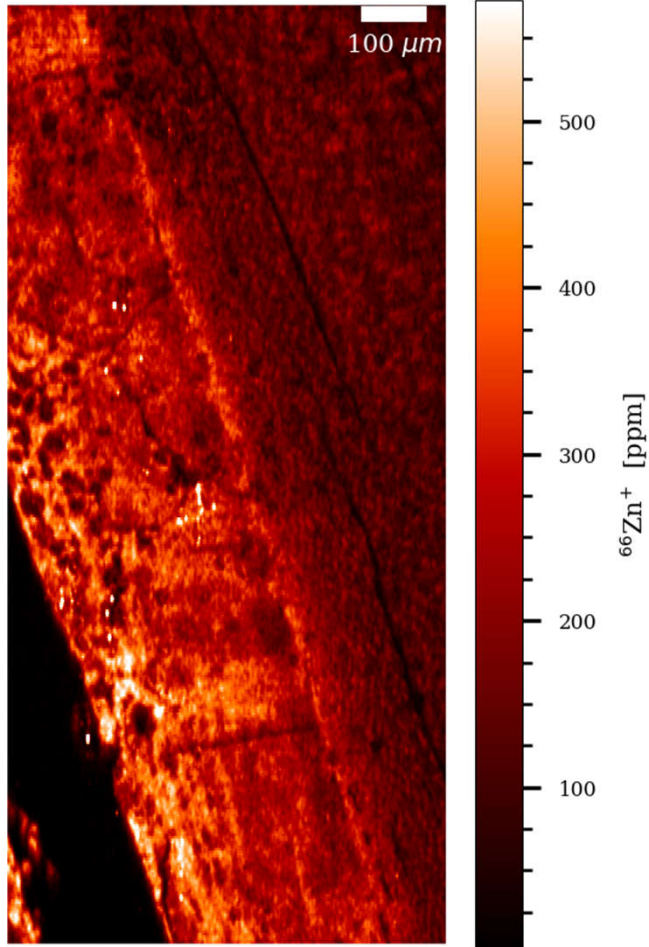

$^{23}\text{Na}$

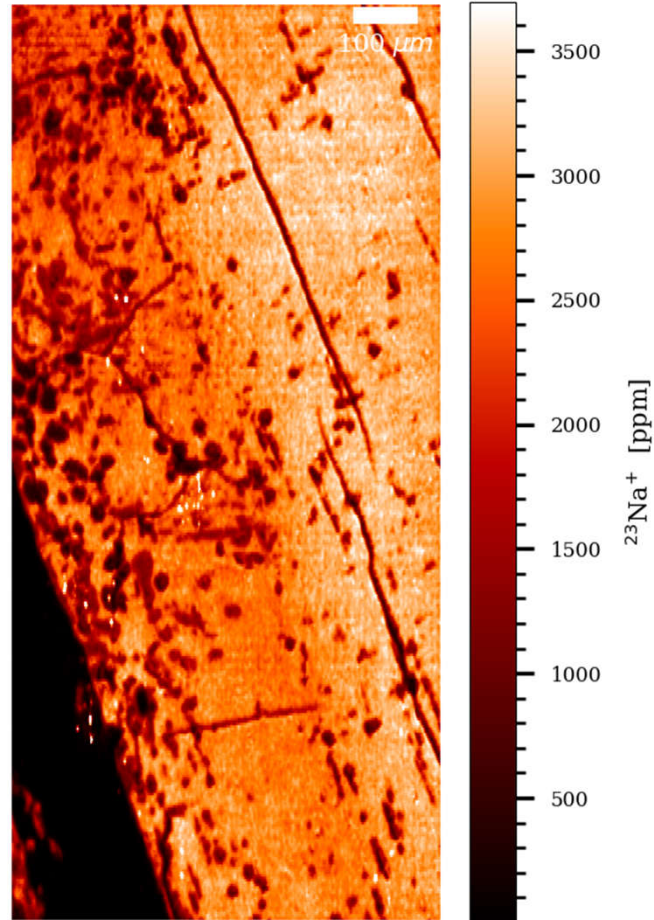

$^{138}\text{Ba}$

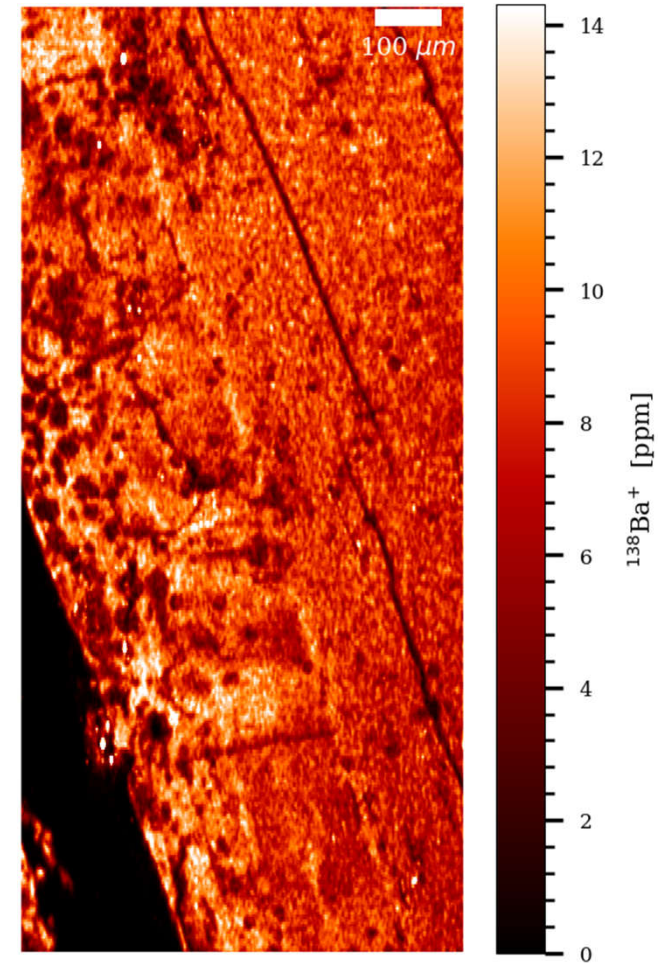



# Odense 533M – Secondary Dentine

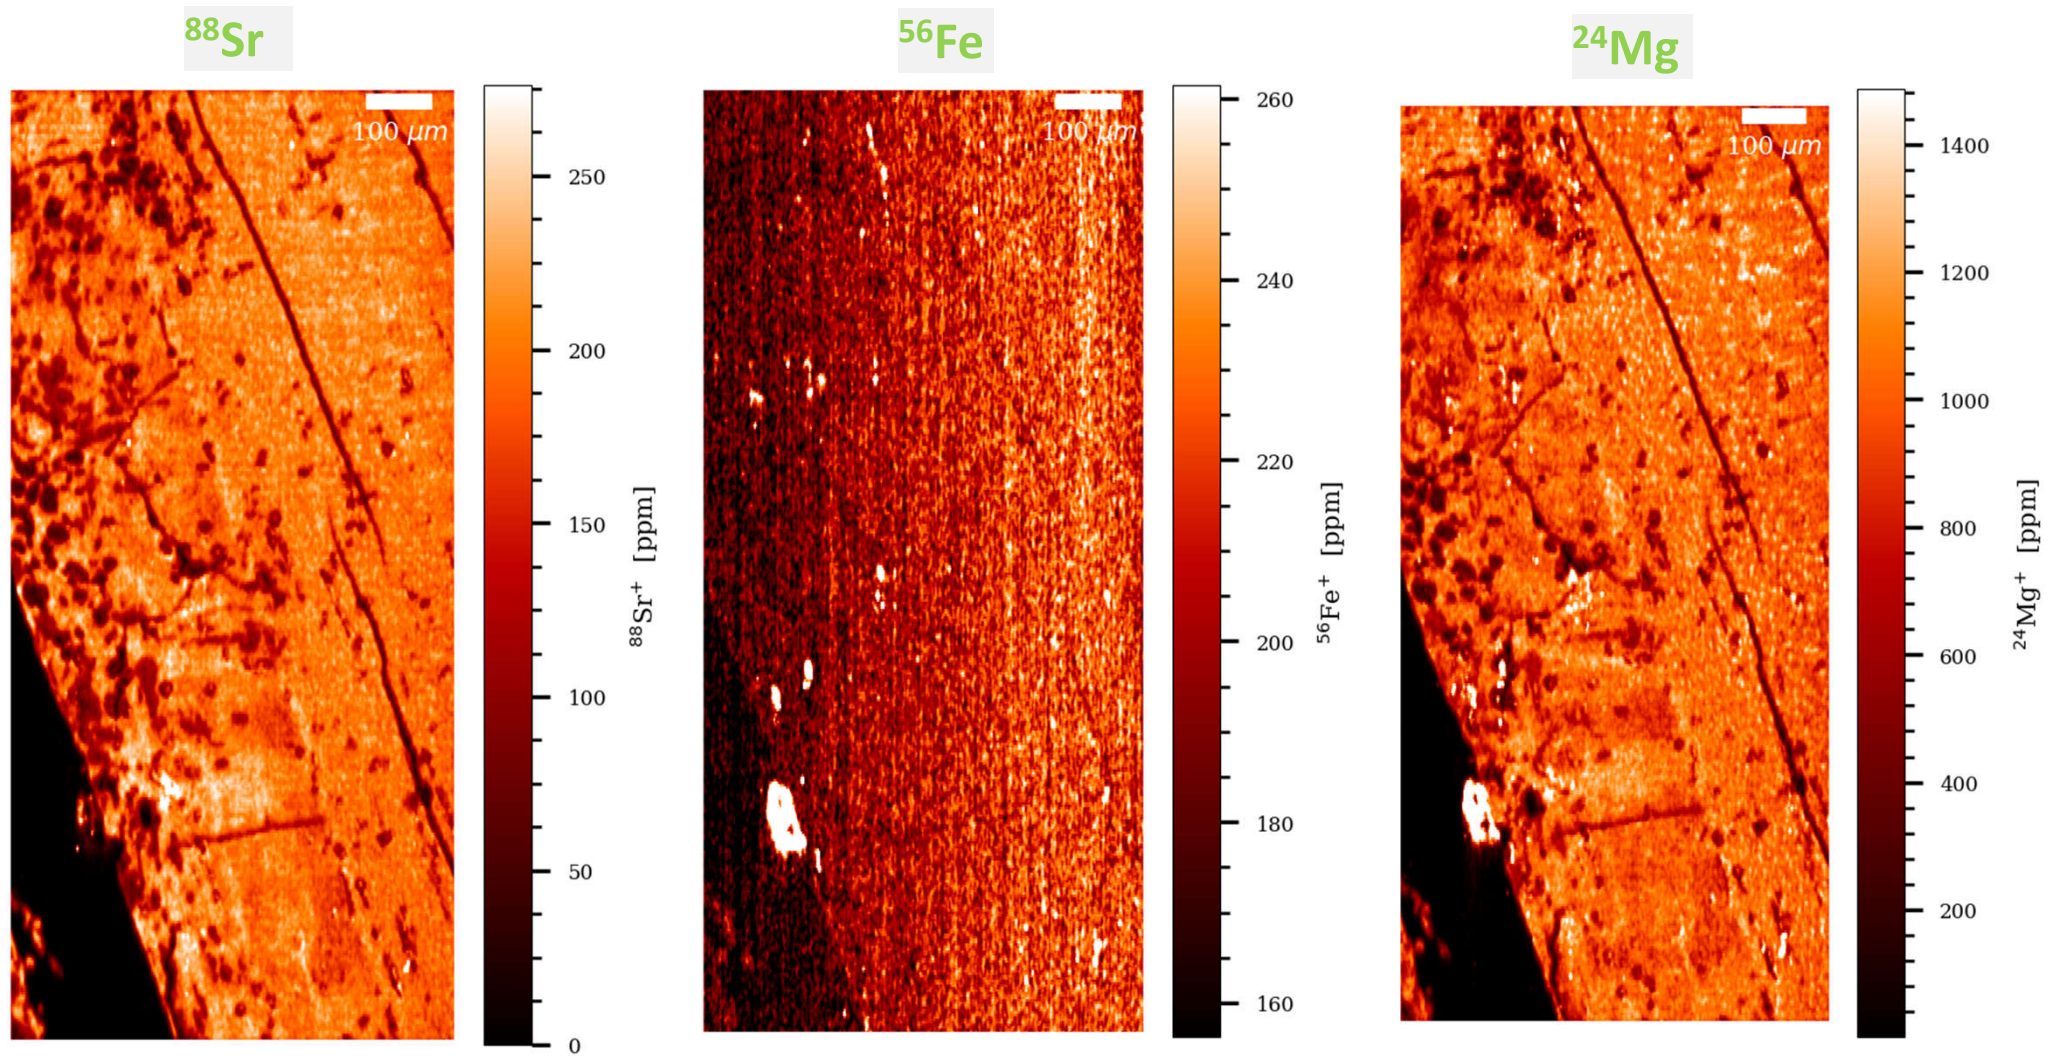



# Odense 533M – Secondary Dentine

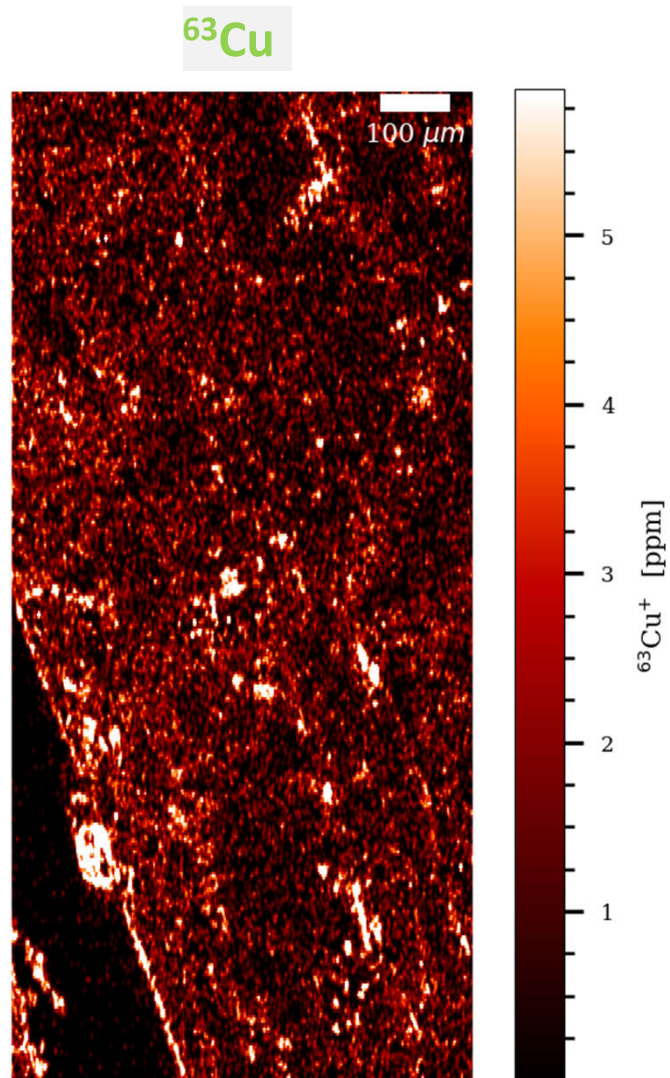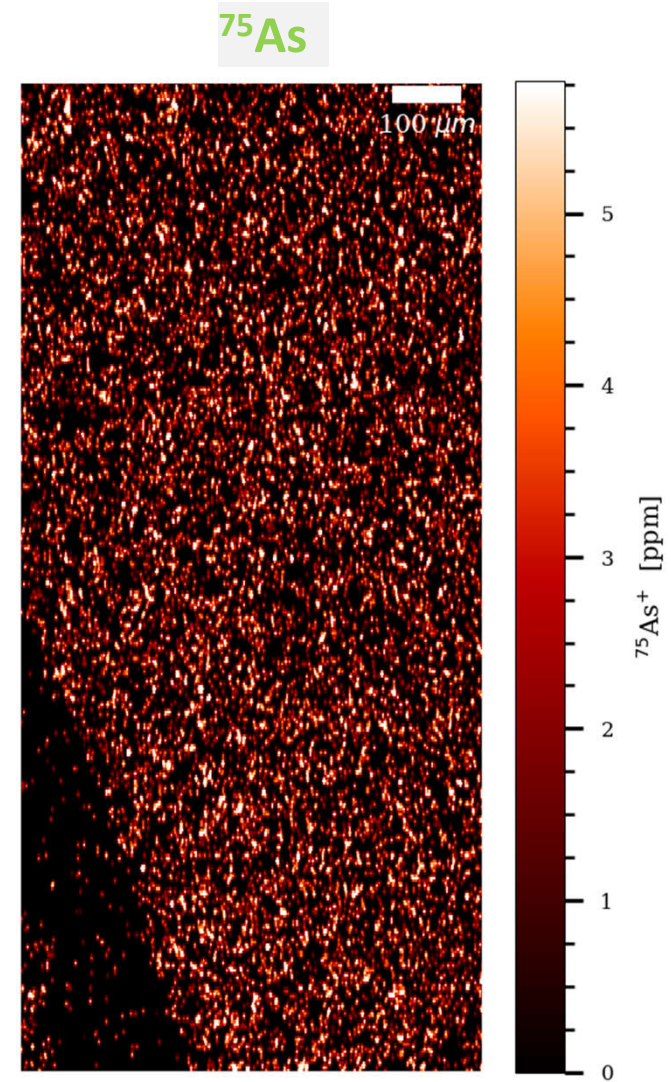



# Odense 533M – Secondary Dentine

$^{202}\text{Hg}$

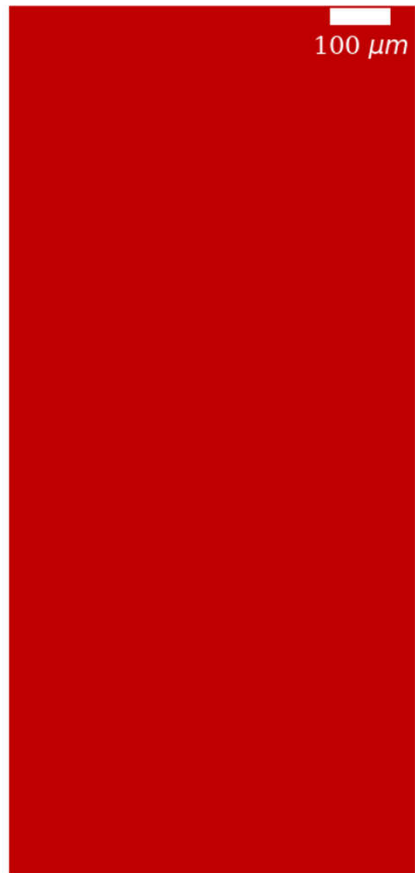

No detectable mercury

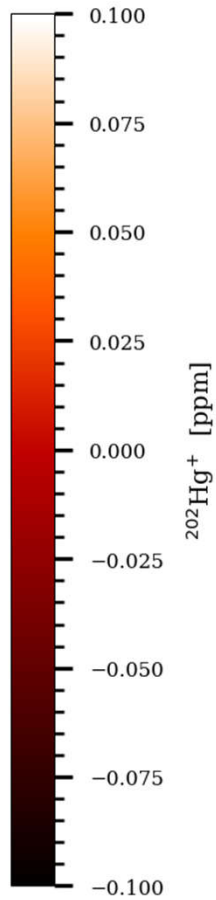

$^{208}\text{Pb}$

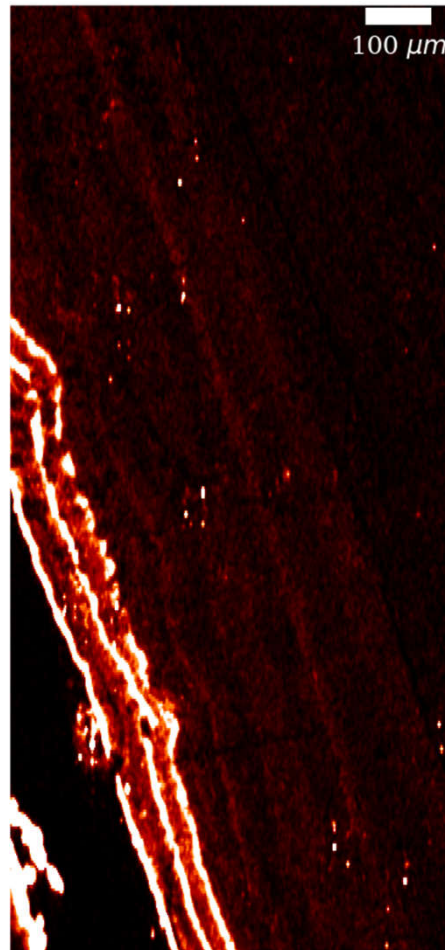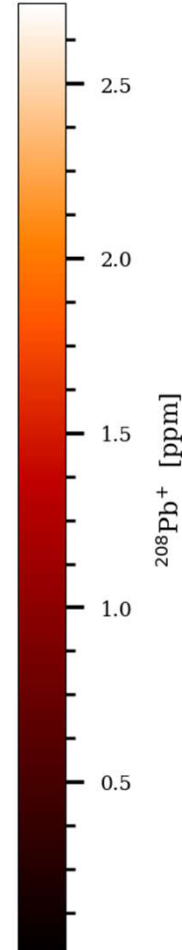

$^{55}\text{Mn}$

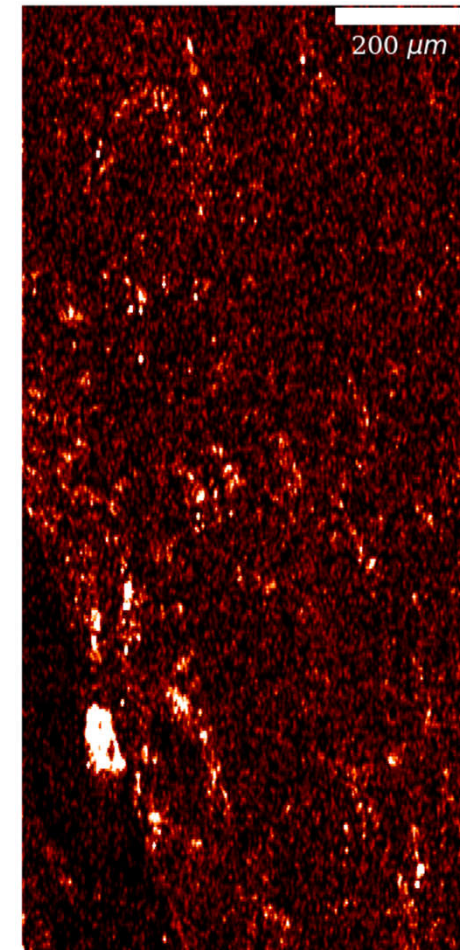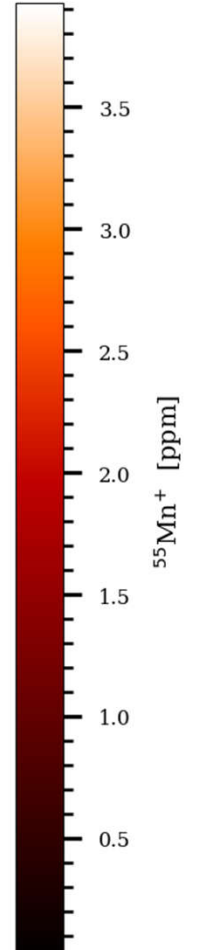

Supplement: s1 [file s1]
