# Supplementary material for: Using SXRF and LA-ICP-TOFMS to Explore Evidence of Treatment and Physiological Responses to Leprosy in Medieval Denmark
Source: MDPI journal article supplement (doi:10.3390/biology12020184), 2023-01-25

## **File S2**

### **Synchrotron Fluorescence (SXRF) results**

**Using SXRF and LA-ICP-TOFMS to explore evidence of treatment and physiological responses to leprosy in medieval Denmark**

## **Biology**

**Anastasia Brozou, Marcello A. Mannino, Stijn J.M. Van Malderen, Jan Garrevoet, Eric Pubert, Benjamin T. Fuller, M. Christopher Dean, Thomas Colard, Frédéric Santos, Niels Lynnerup, Jesper L. Boldsen, Marie Louise Jørkov, Andrei Dorian Soficaru, Laszlo Vincze, Adeline Le Cabec**

**Corresponding author:**

**Adeline Le Cabec**

**E-mail: [adeline.le-cabec@u-bordeaux.fr](mailto:adeline.le-cabec@u-bordeaux.fr)**

## Data reconstruction

- Raw data were fitted and calibrated.
- The calculation takes into account the **average thickness of the tooth section** measured by subtracting the thickness of the glass slide from {tooth section + epoxy bond ~negligible thickness + glass slide}.
- The **background noise has been subtracted** from the sample for each element.

In the next slides:

- “*Scanning*”: actual areas scanned.
- Images reported in this ppt are “Mass diffraction”, in  $\text{mg.kg}^{-1}$  (ppm).
- It is also possible to report “areal density”, in  $\text{g.cm}^{-3}$
- To save space, the elemental maps of some teeth may have been rotated by  $90^\circ$ .
- Maps are displayed using the “Gistheat” colormap.
- To enhance the banding/stress pattern while reducing overall noise, a 2D Gaussian filter was applied to the datasets. The kernel size (=strength of the filter) used is indicated for x and y. This will induce a slight smoothing of any curve generated from a transect. The curve may be saved from the same transect on the unfiltered dataset.
- To improve the visibility of distribution patterns, the contrast is adjusted on the maps, thus not displaying the full range of concentrations recorded in the scan. Numbers cited in the text have been directly measured on the scans, with the full range of concentrations.

### K emission lines.

- For elements which  $K\alpha < 17$  keV, the detectors capture the K emission lines within the remitted fluorescent light: Ca, Zn, Sr, Cu, Fe, Mn.
- Data are fitted and calibrated, and were processed (open .nxs, colormap, 2D Gauss filter) in HDIP.

### L emission lines.

- For elements which  $K\alpha > 17$  keV, the detectors only capture the L emission lines within the remitted fluorescent light: Pb and Ba.
- For these elements, data were NOT calibrated.
- For each element, the 32 bit images from Detector 0 and Detector 2 were added in Image J (Process> Image Calculator), and then filtered using a Gaussian blur (Process> Filters> Gaussian blur) with a kernel size of 0.7-0.9.

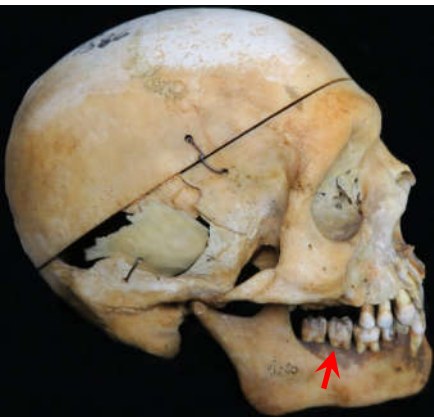

# Romania – R1386 LRM2

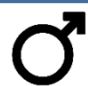

36 yrs. 1890 – 1926 CE

Blacksmith deceased in Colentina Hospital (Bucharest)

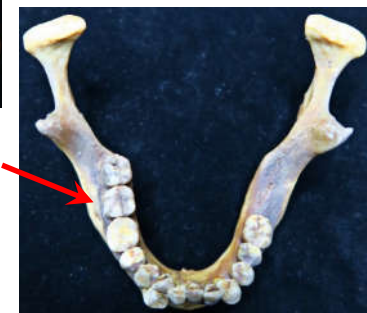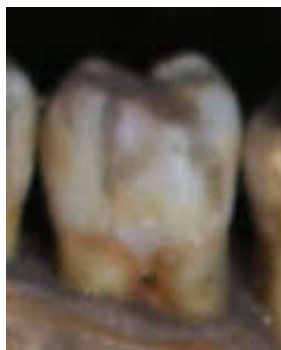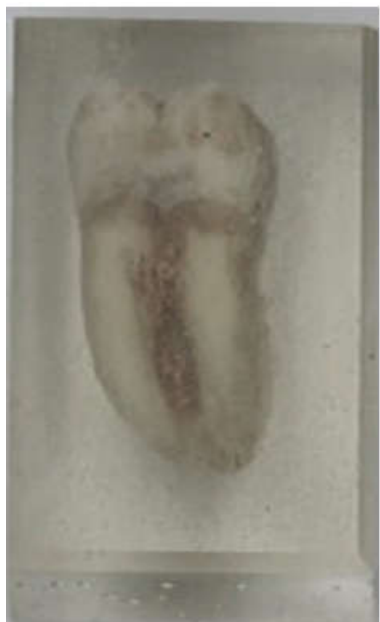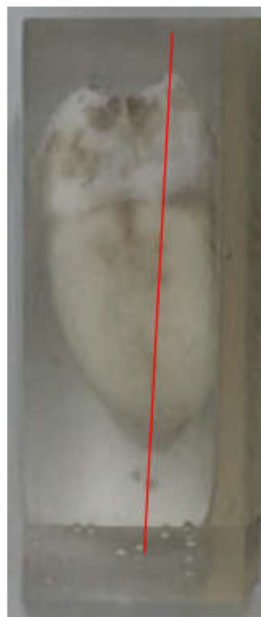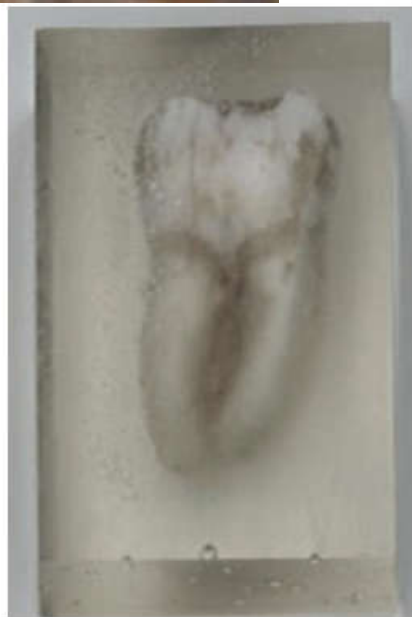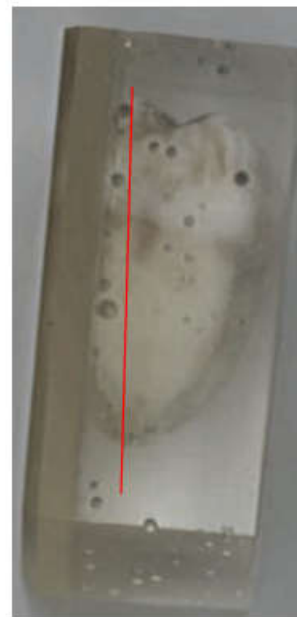

Average tooth section thickness ( $\mu\text{m}$ ): 112.5

Distal

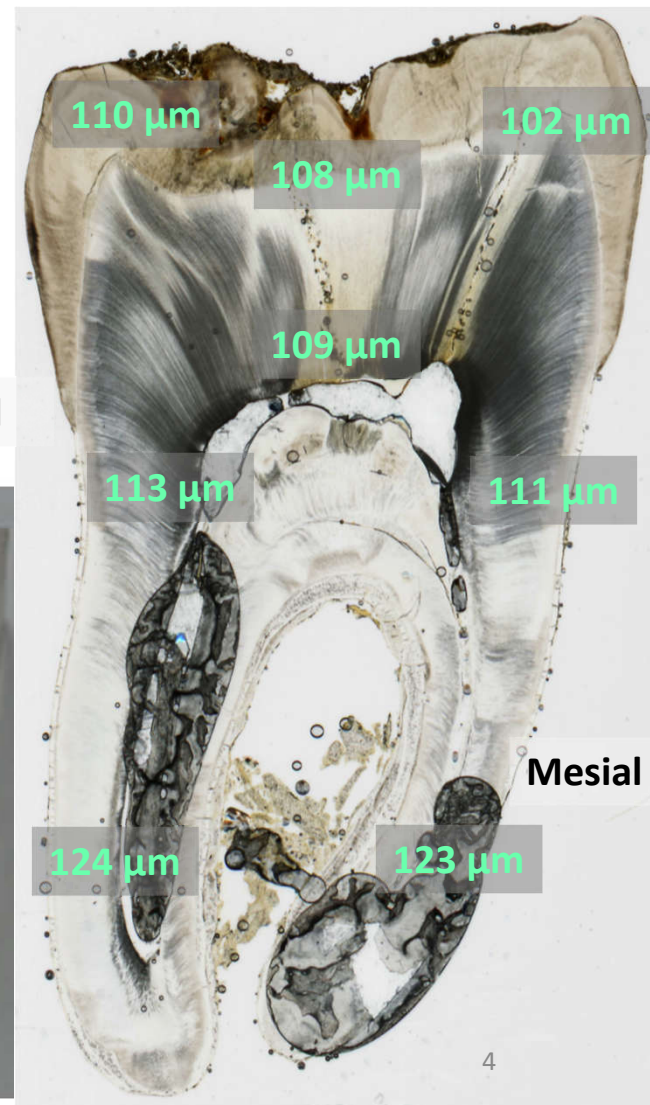



R1386 LRM2

## Scanning

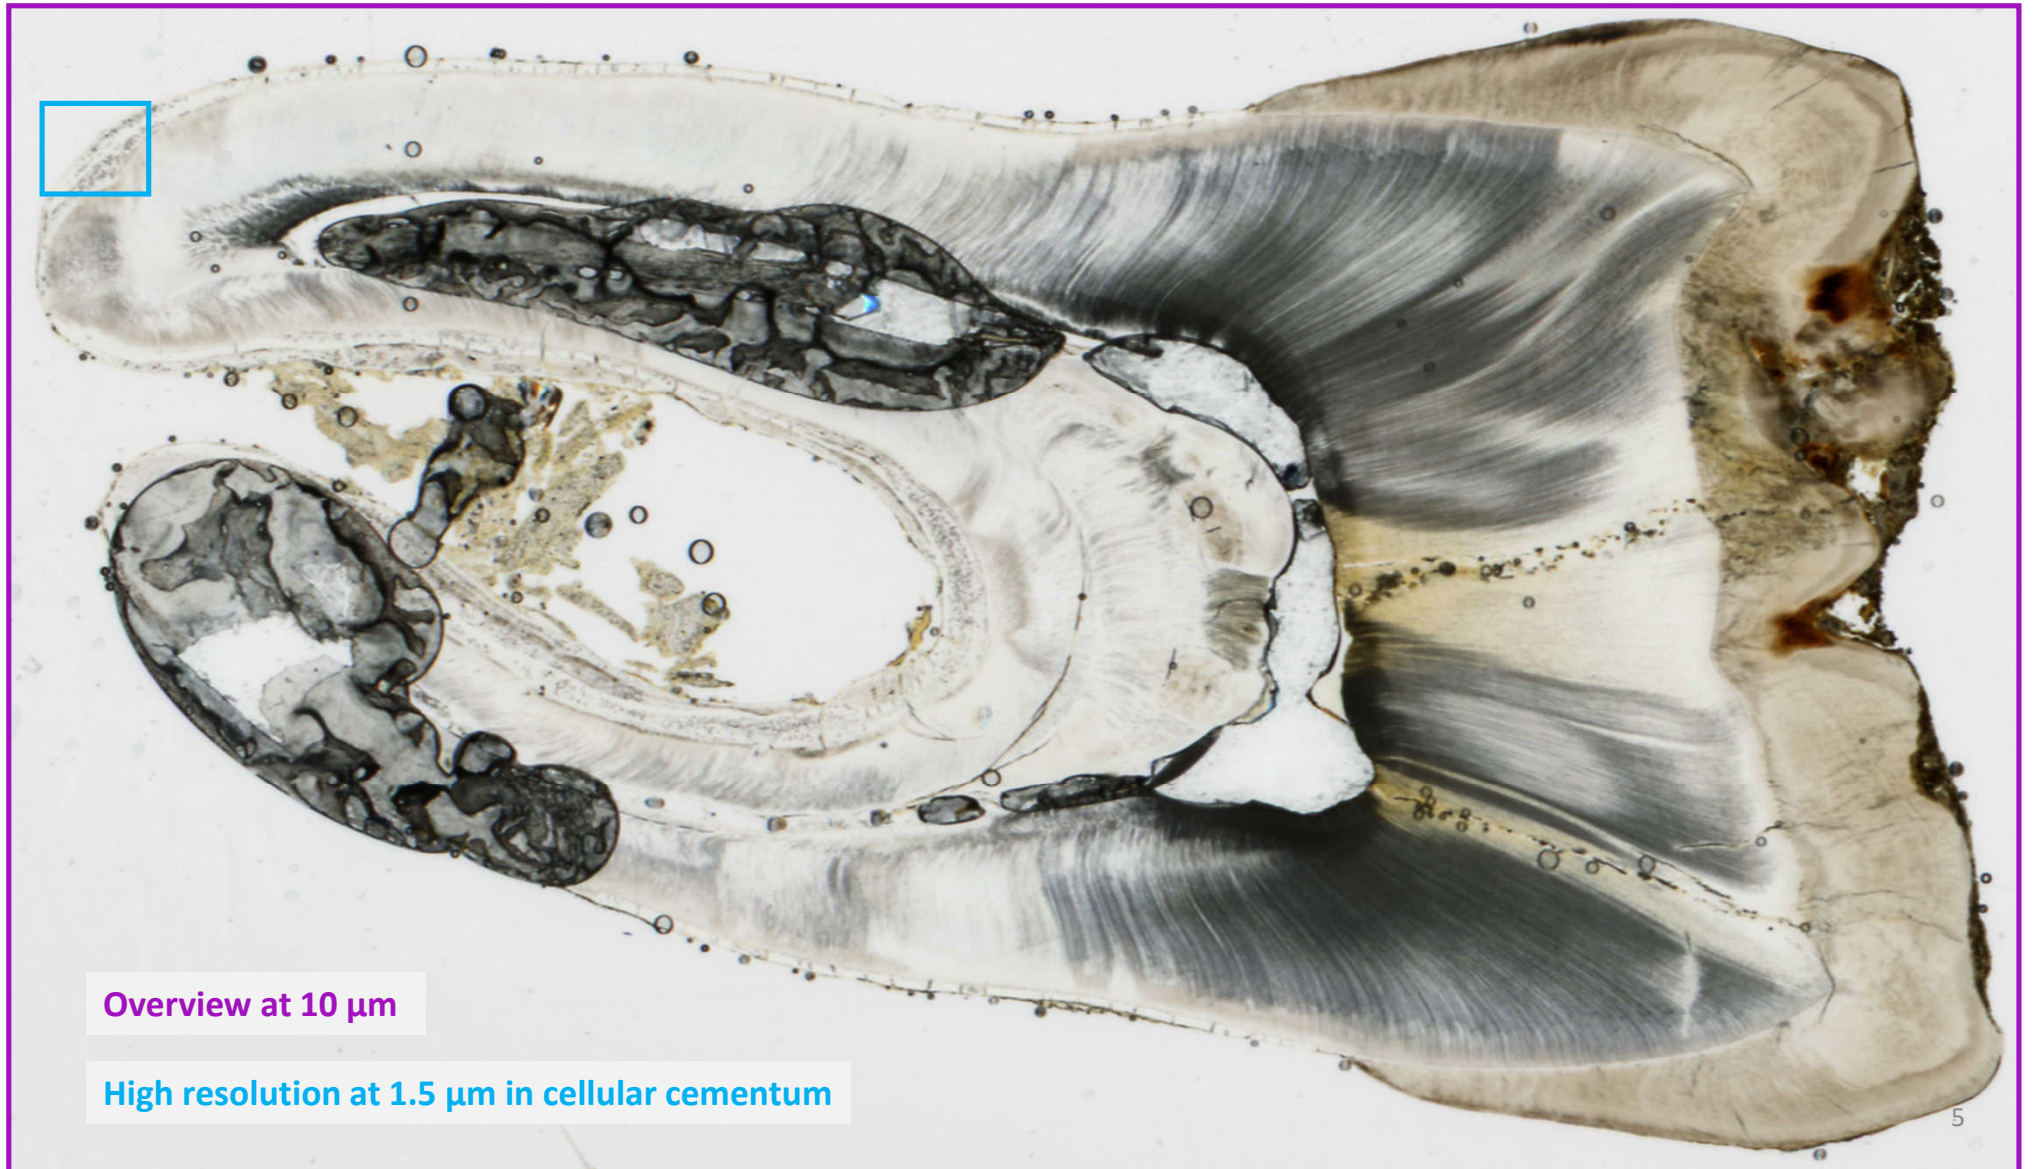

R1386 LRM2

Overview at 10  $\mu$ m

Gauss (1x1)

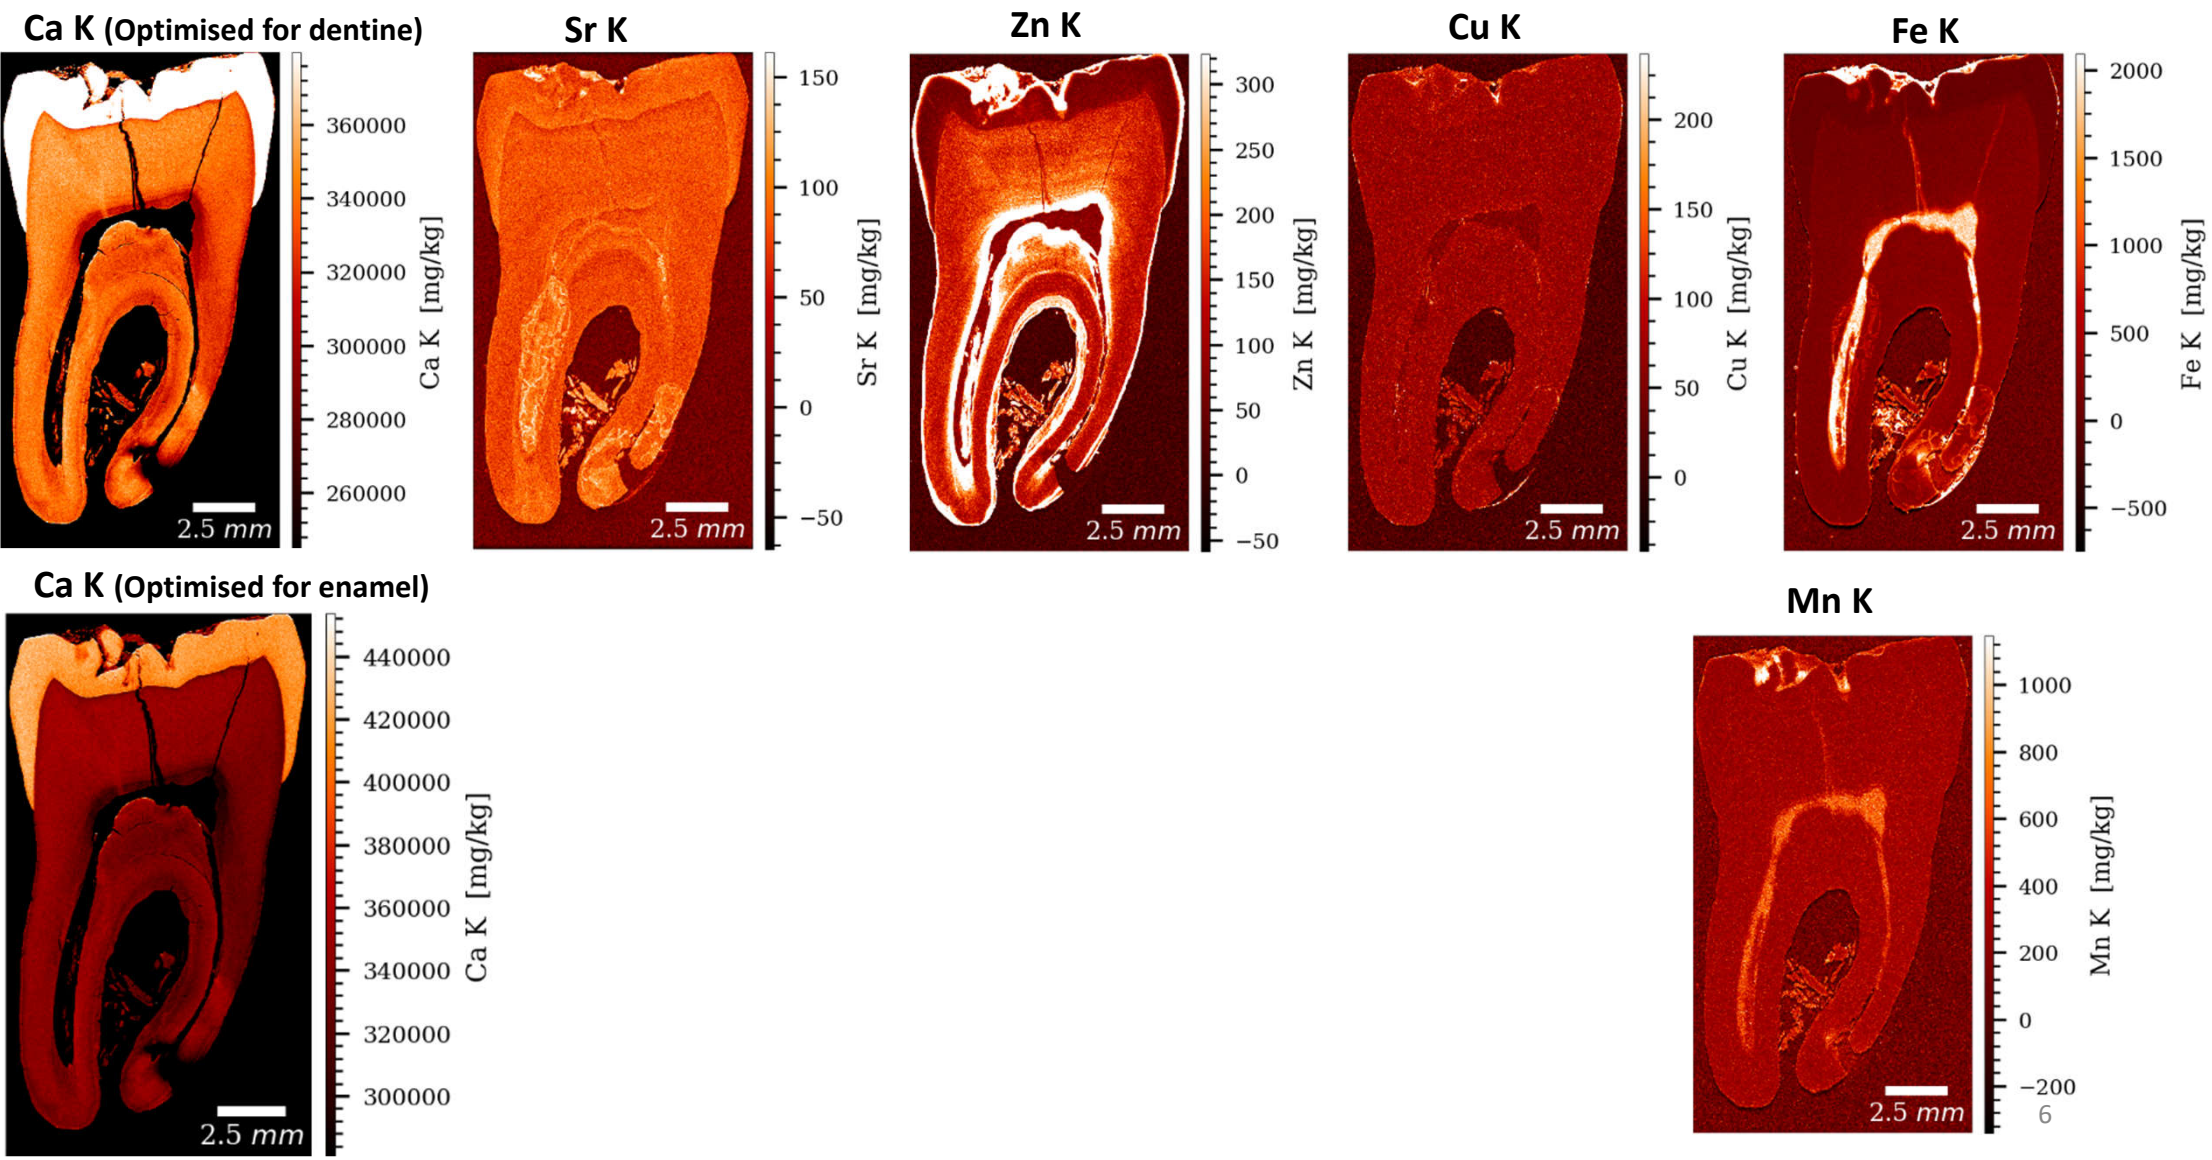



Close-ups for elemental variations in the dentine

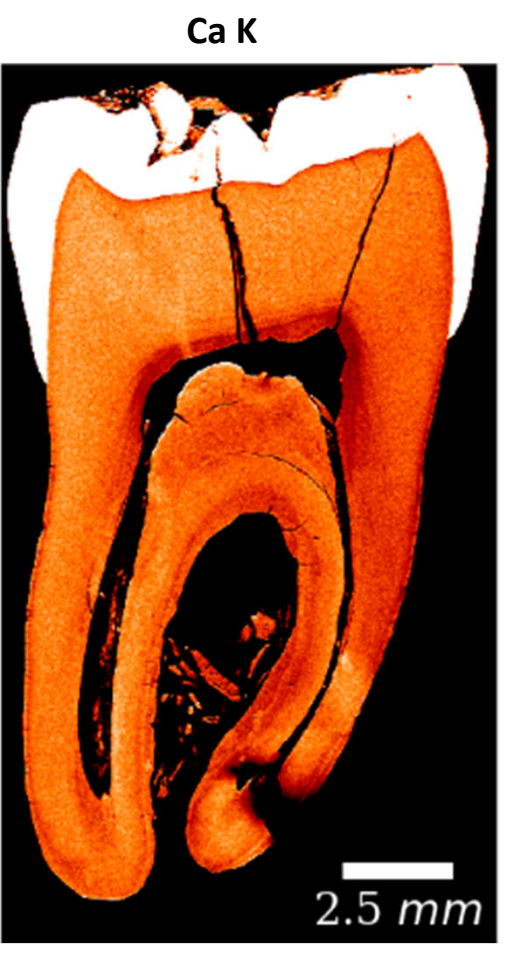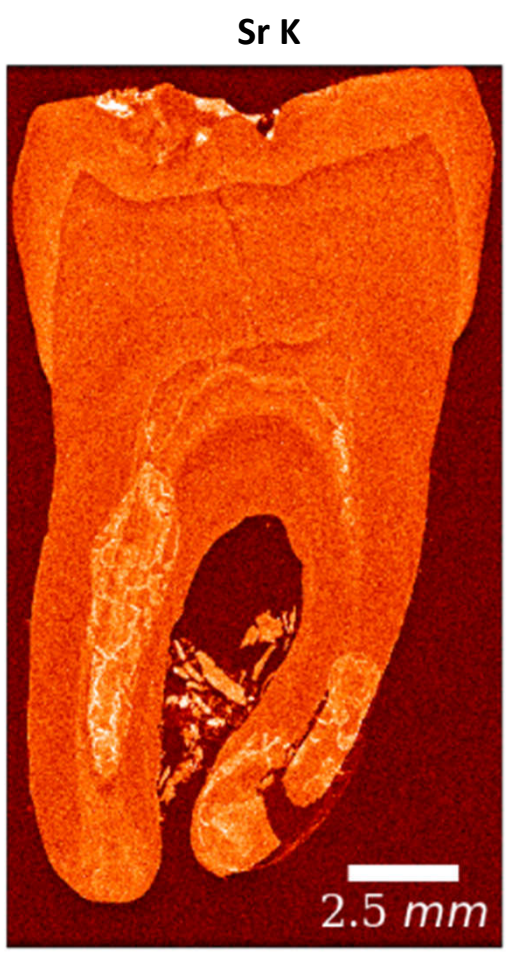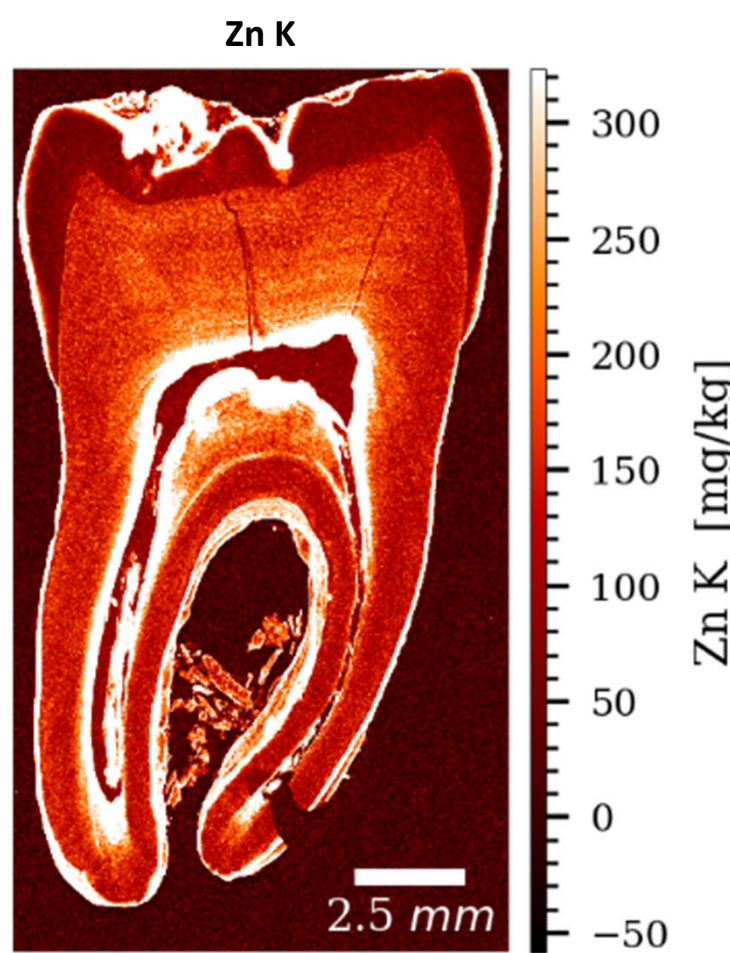



R1386 LRM2

Br K

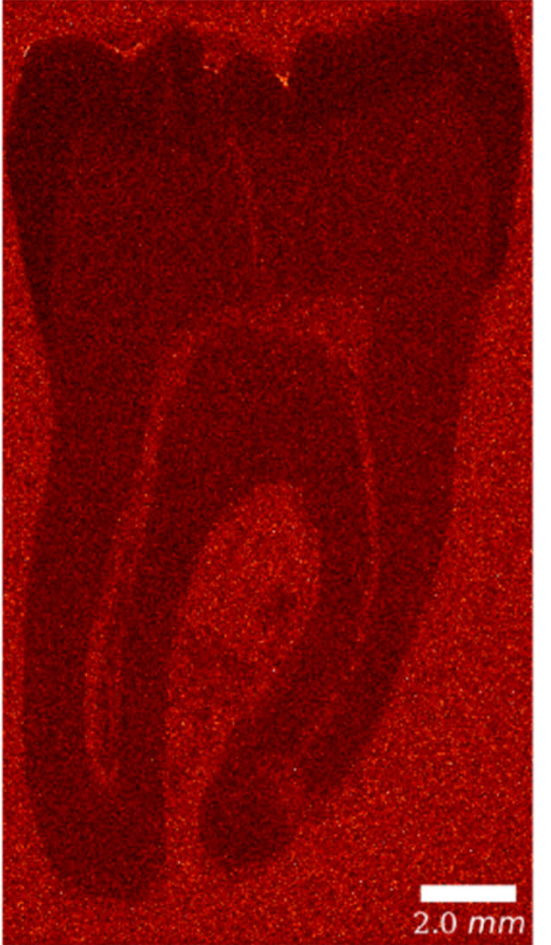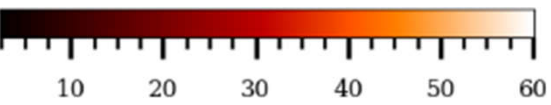

Br K [a.u.]

Overview at 10  $\mu$ m

Pb L

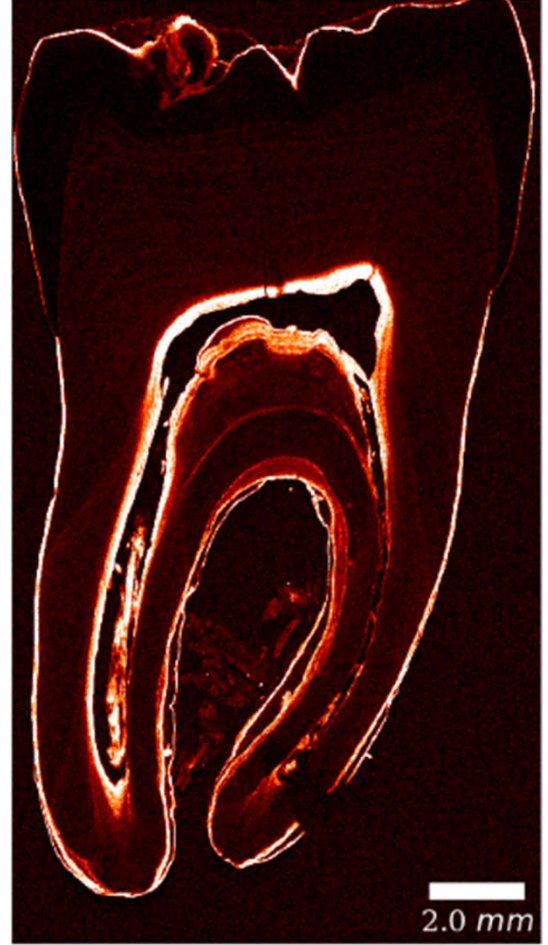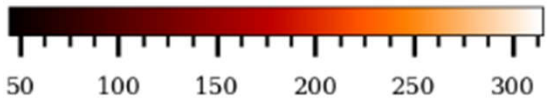

Pb L [a.u.]

Optimised for cementum and secondary dentine

Uncalibrated data (arbitrary units) Gauss (1x1)

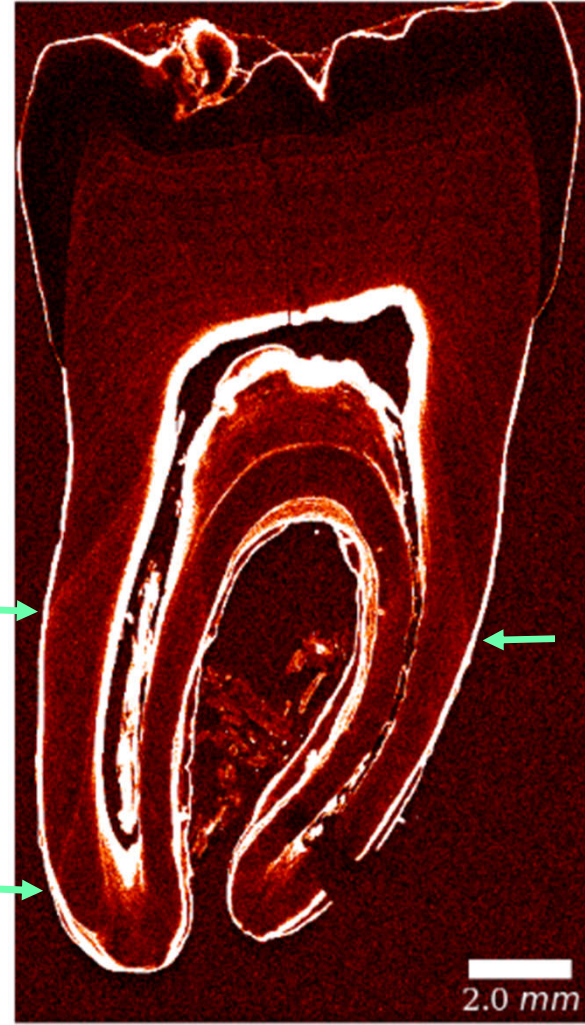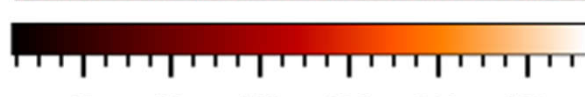

Pb L [a.u.]

- Optimised for primary dentine
- Significant increase in Pb at mid-root (~adolescence)

Close-ups for elemental variations in the cementum and secondary dentine

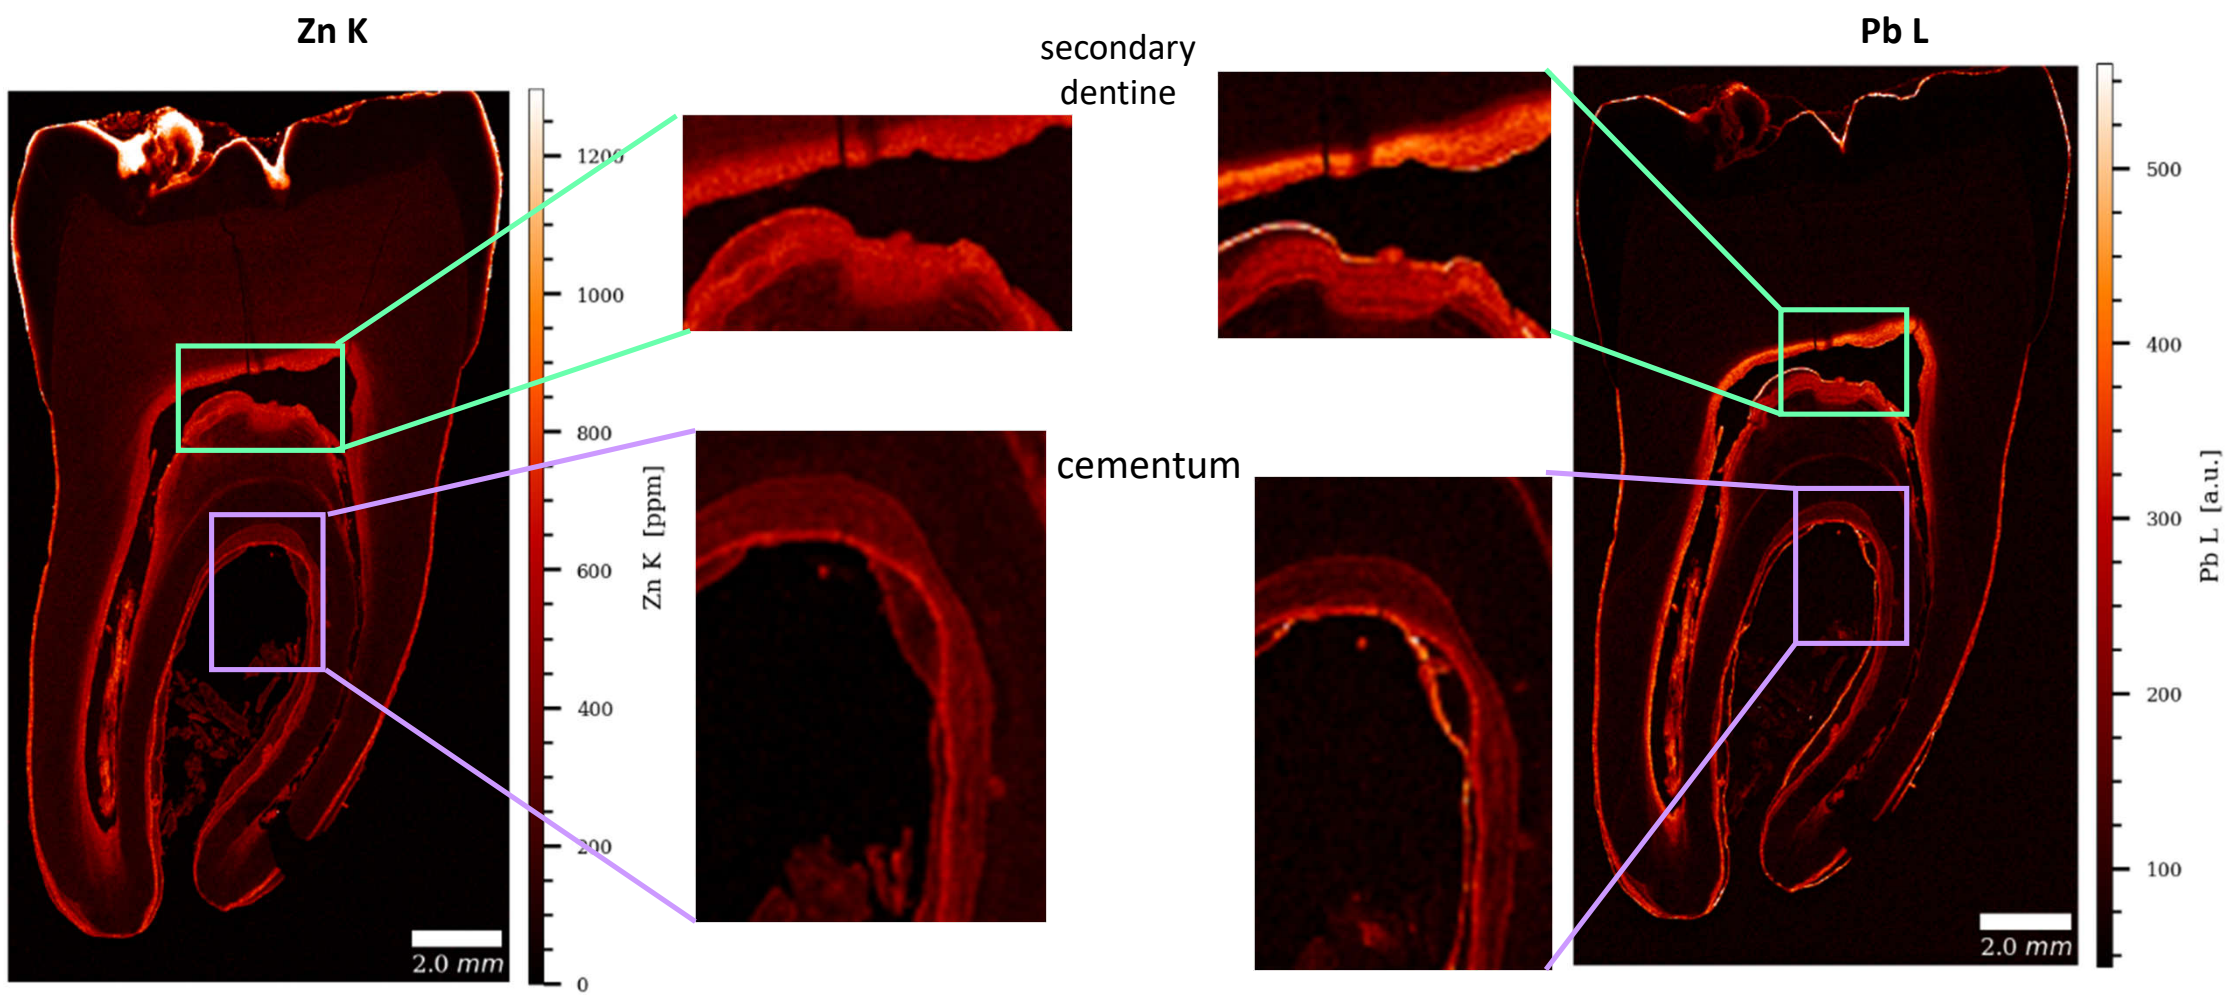



R1386 LRM2

High resolution at 1.5  $\mu\text{m}$

Gauss (0.8x0.8)

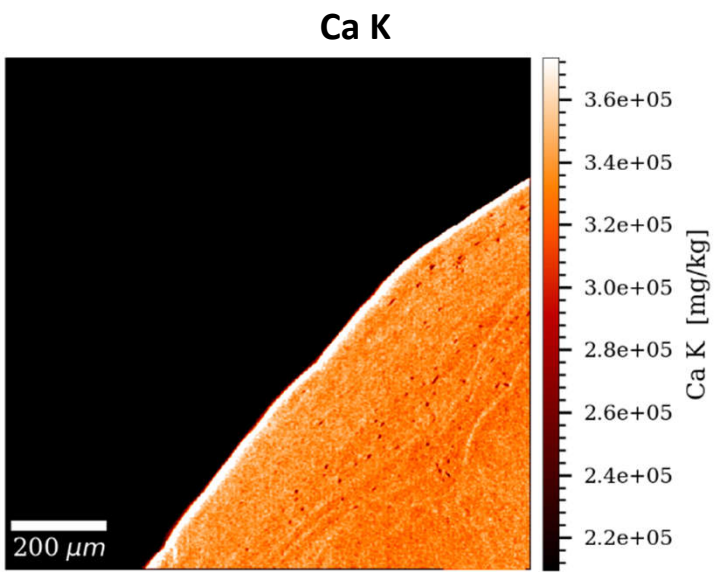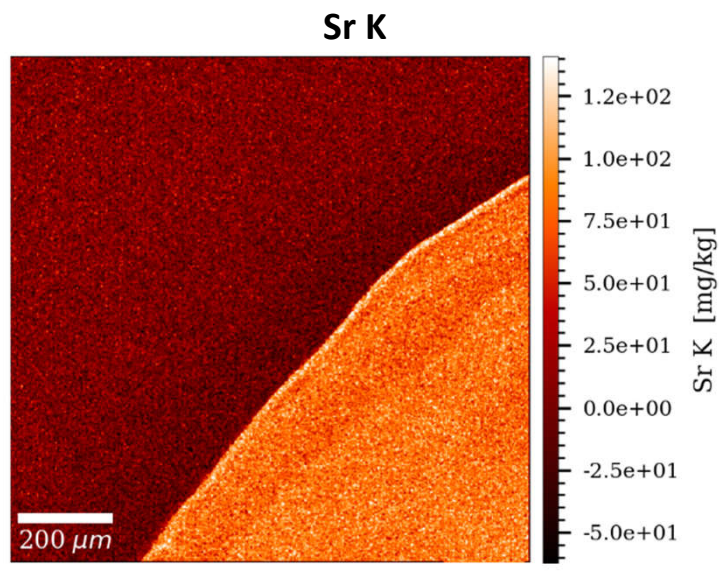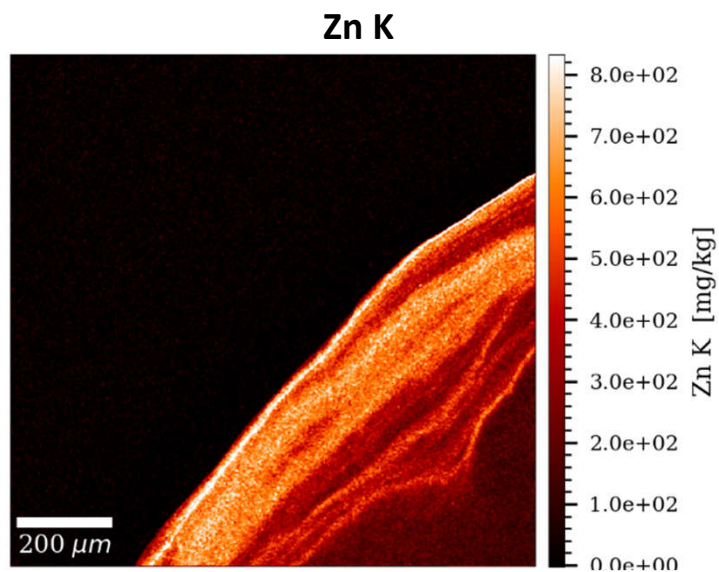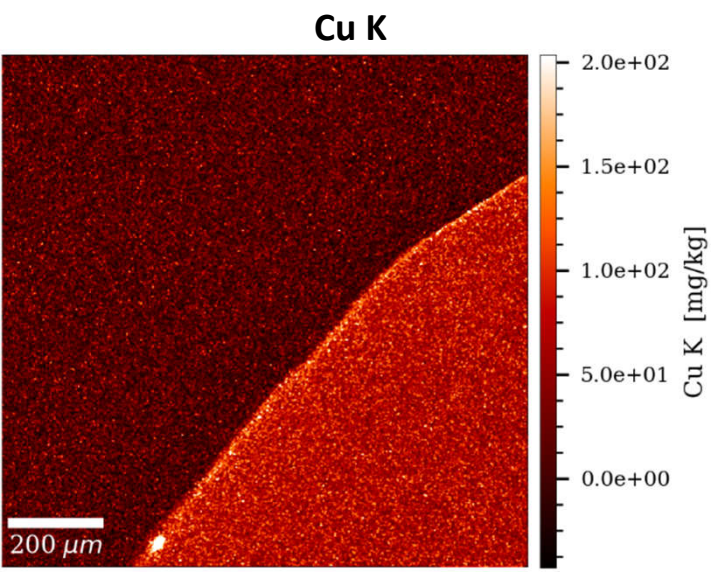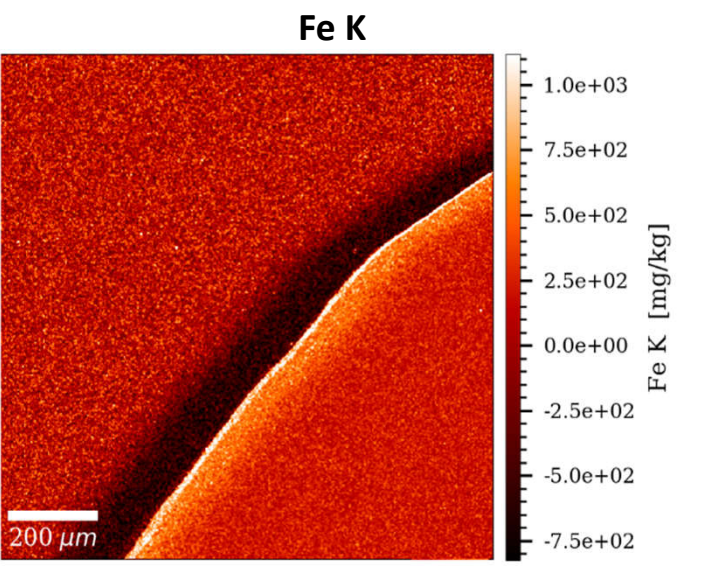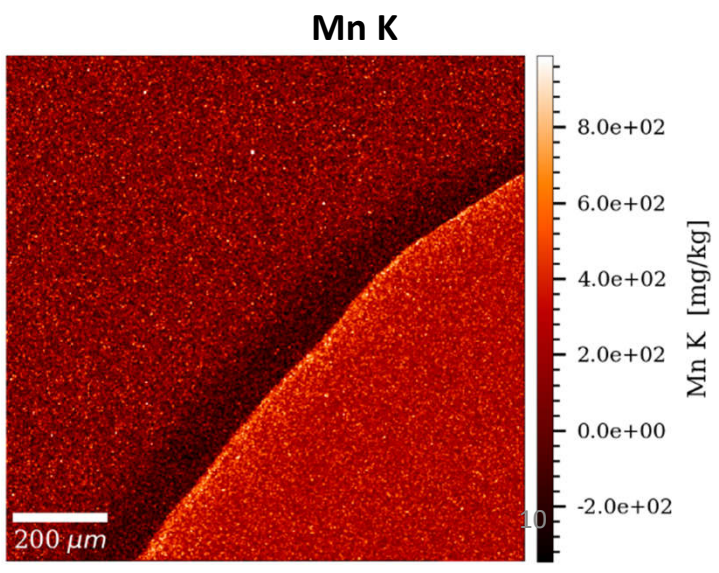



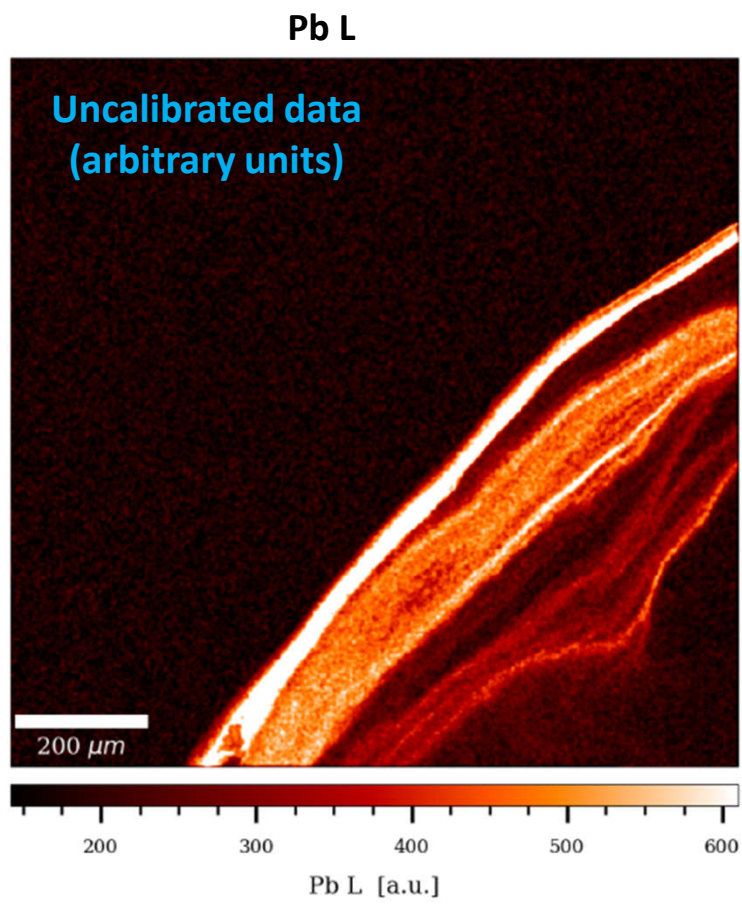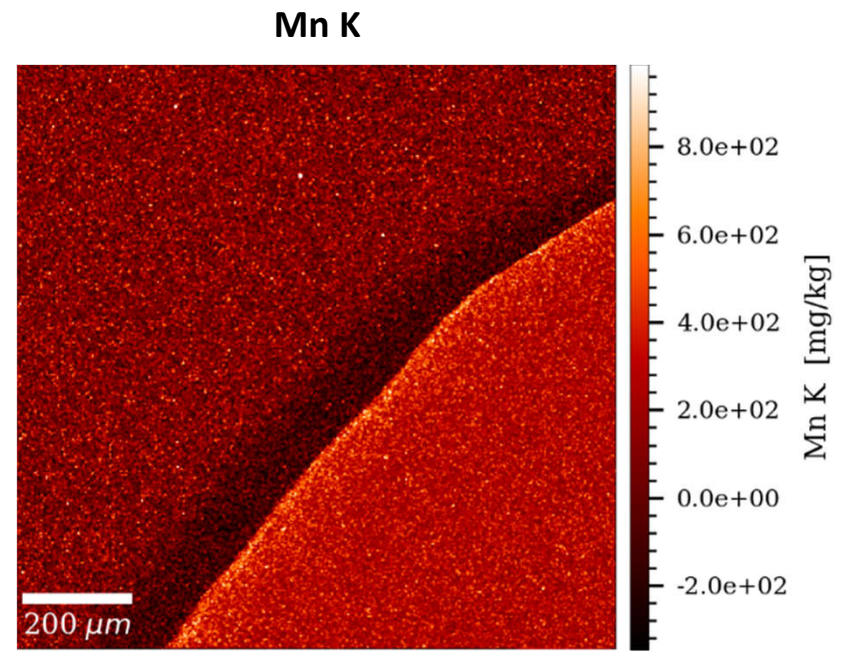



# Romania – A1651 LRM1

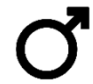

Beginning of 20<sup>th</sup> c.

Average tooth section  
thickness ( $\mu\text{m}$ ): 121.75

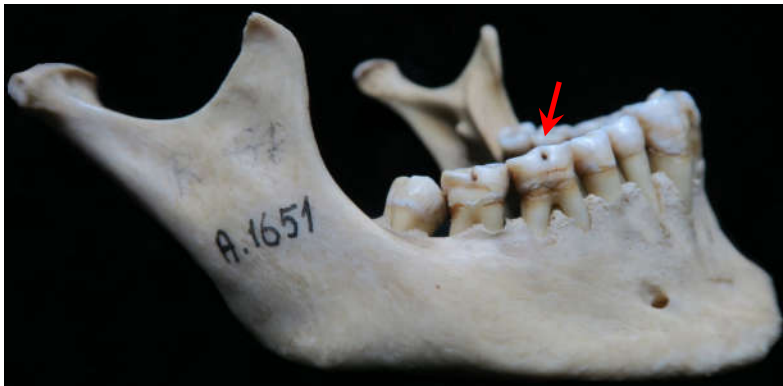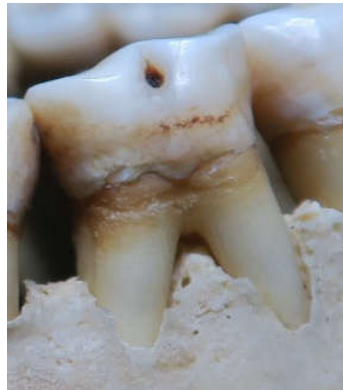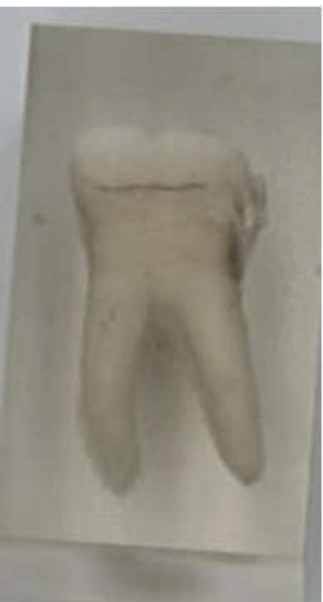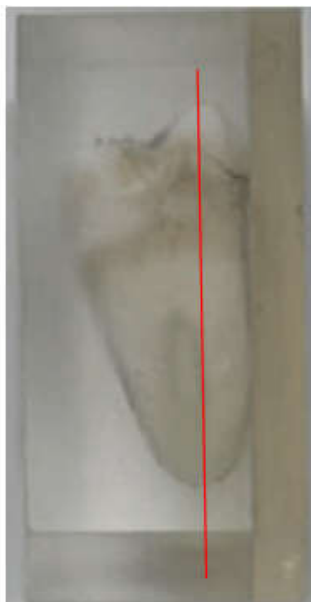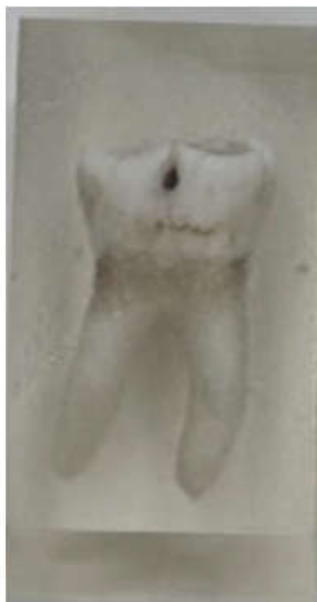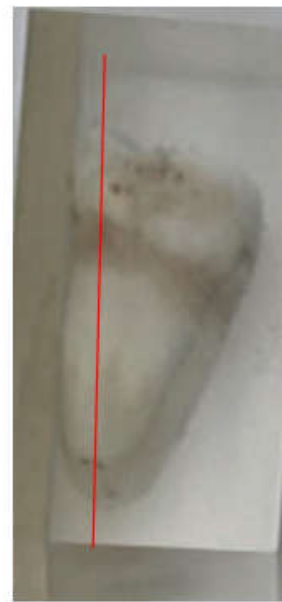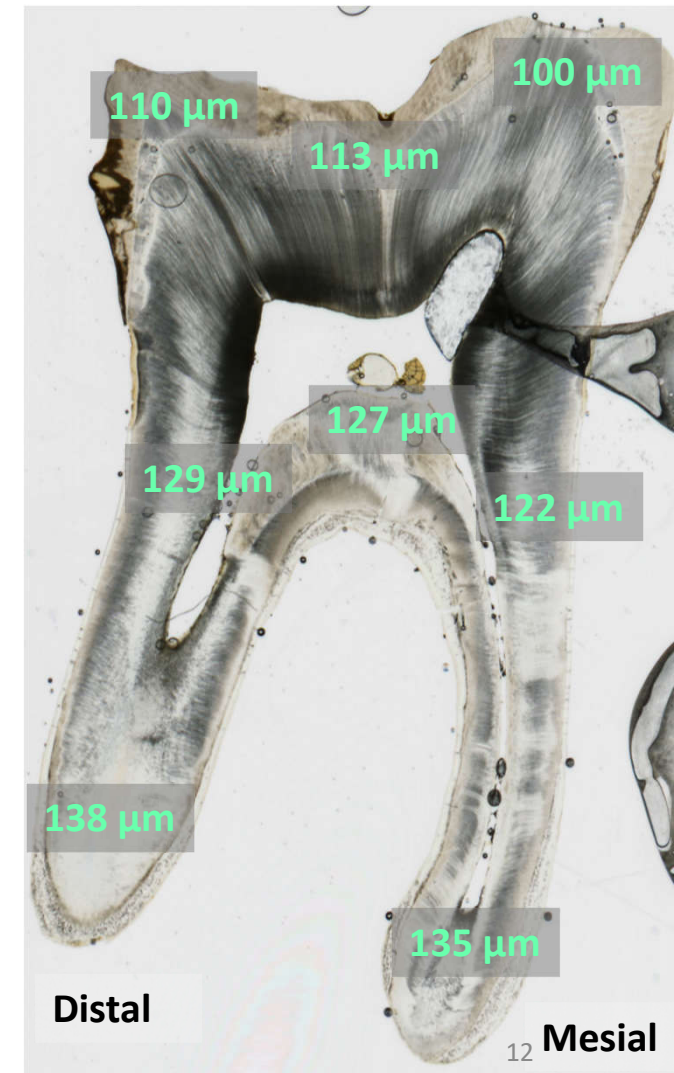

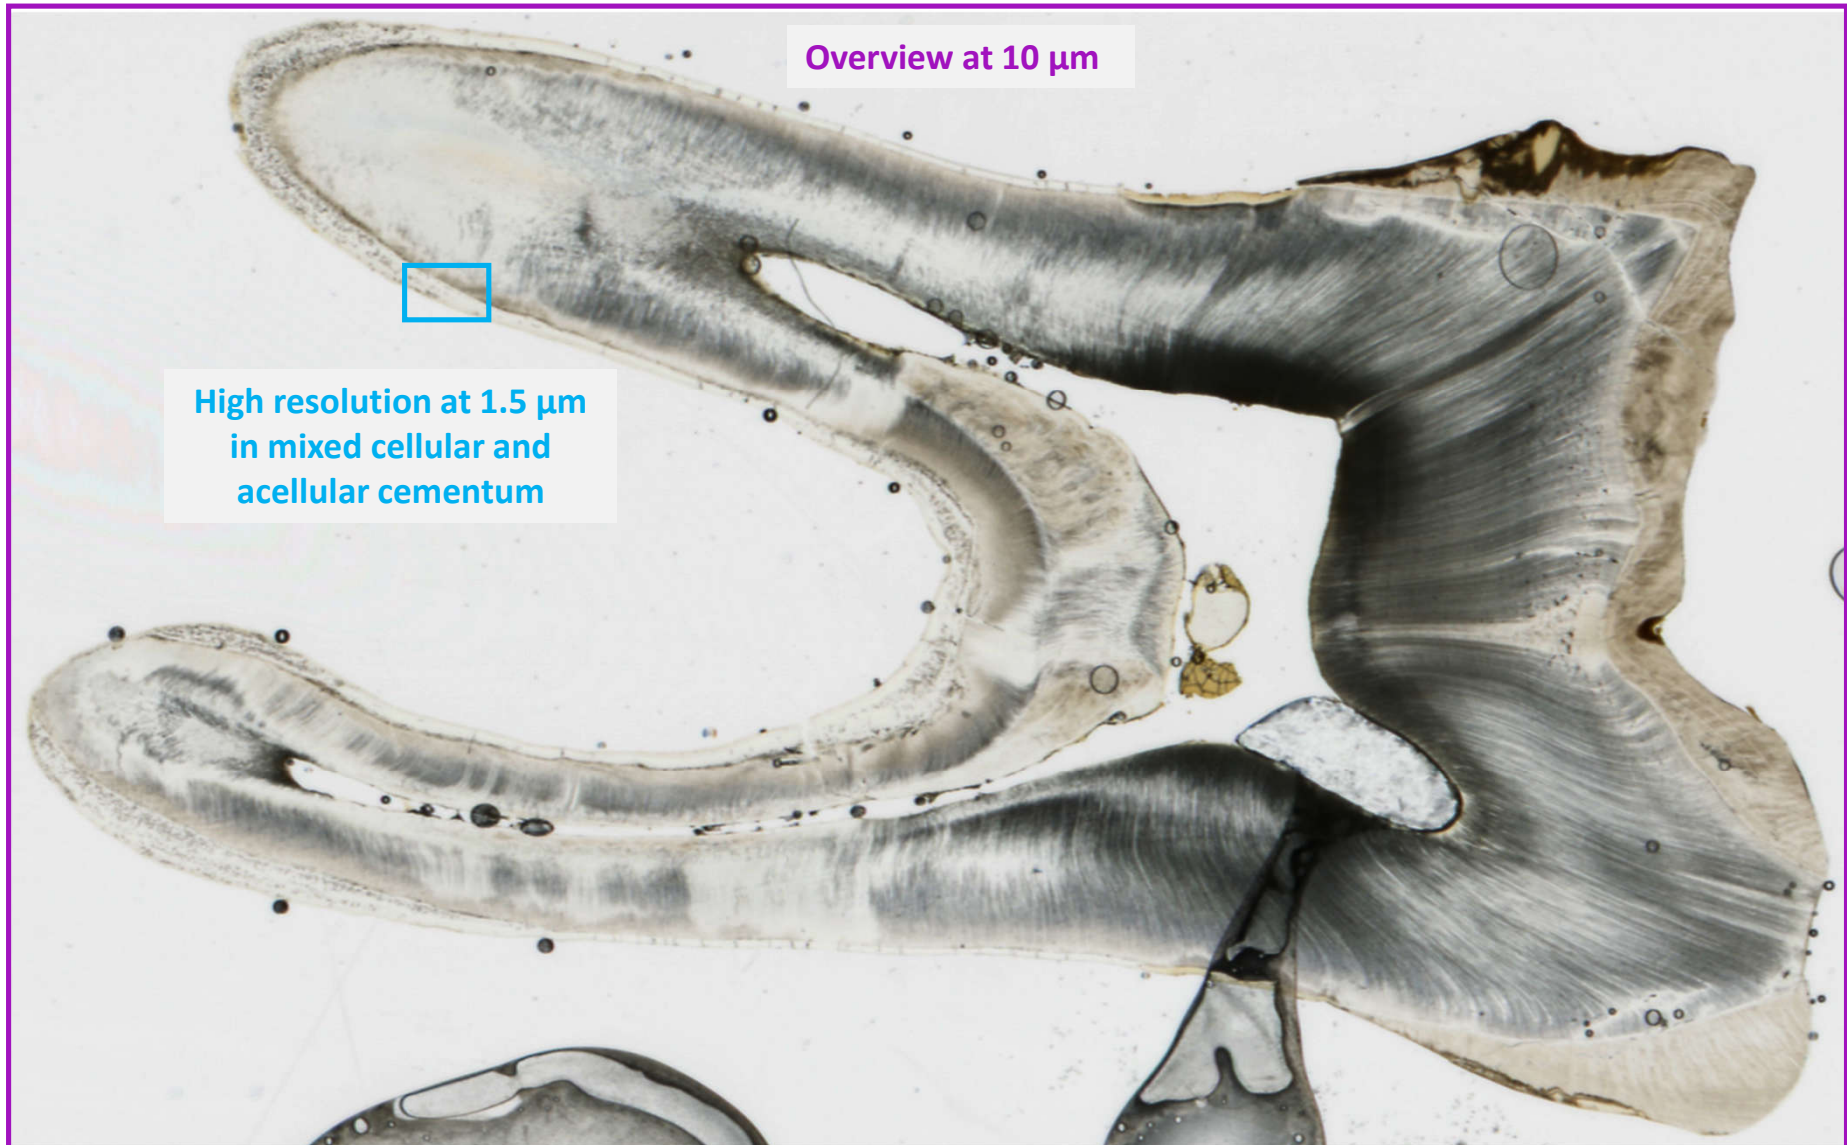



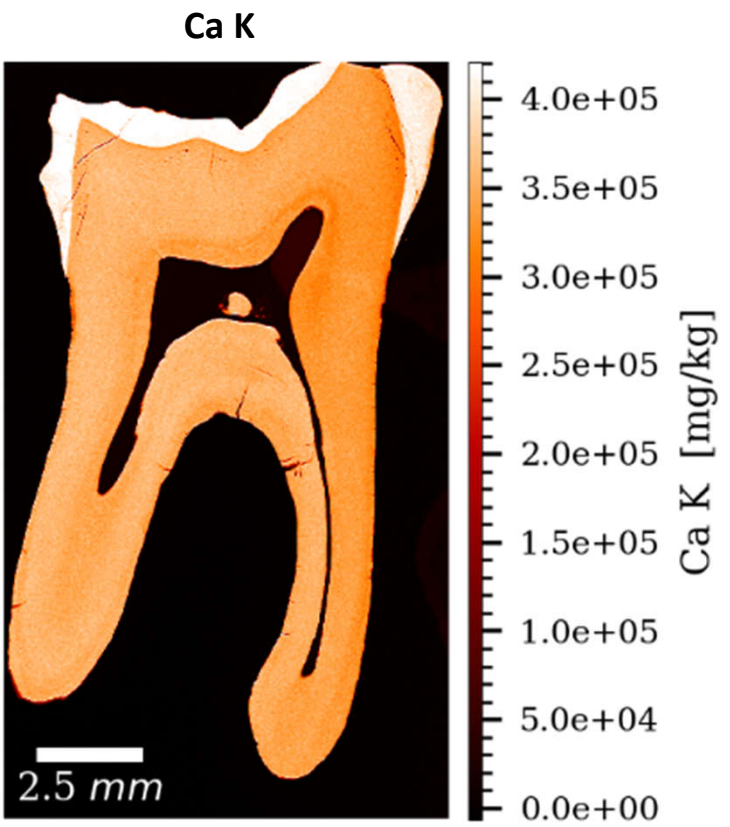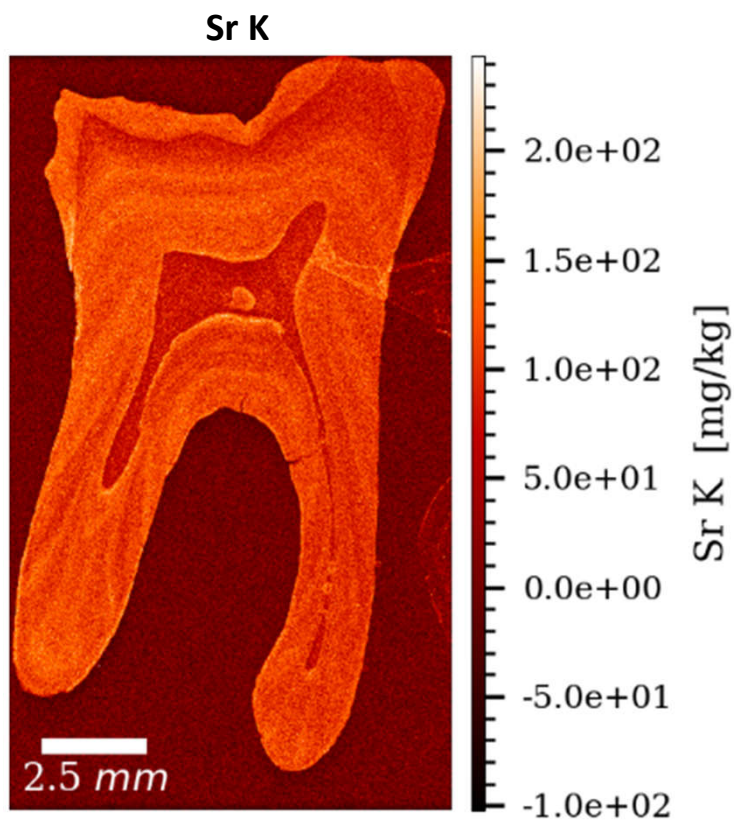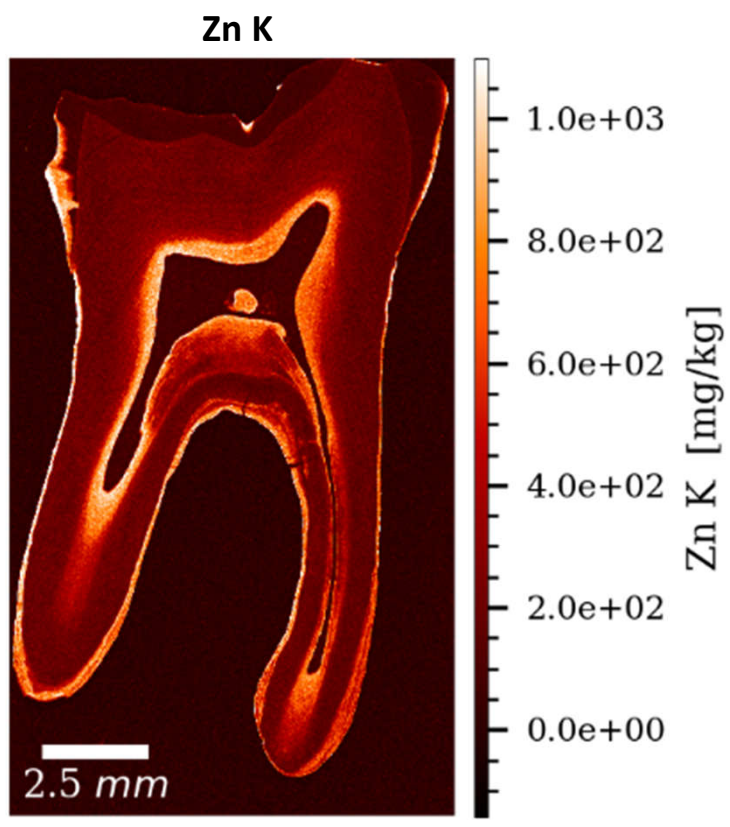

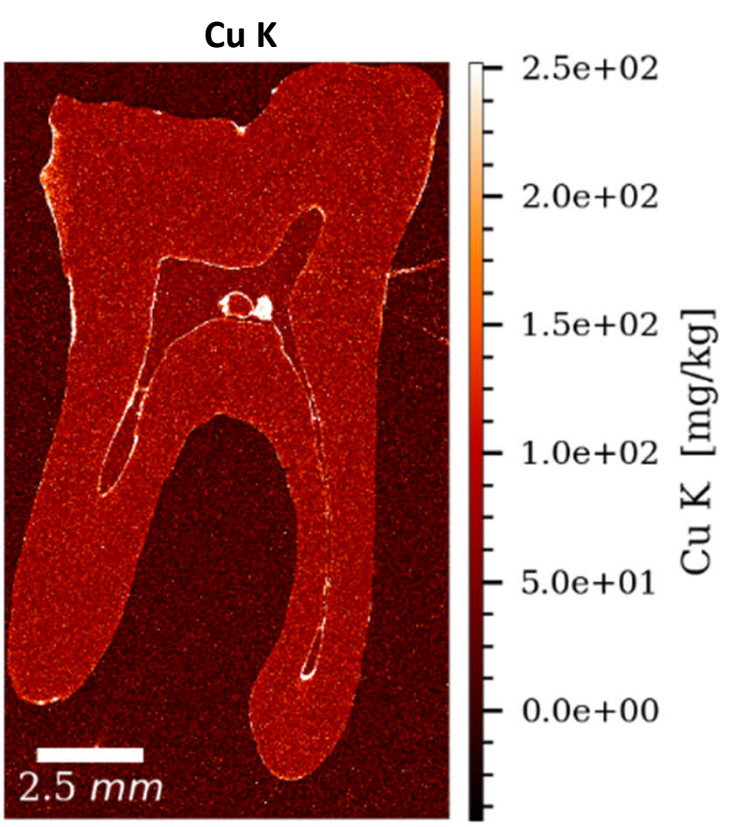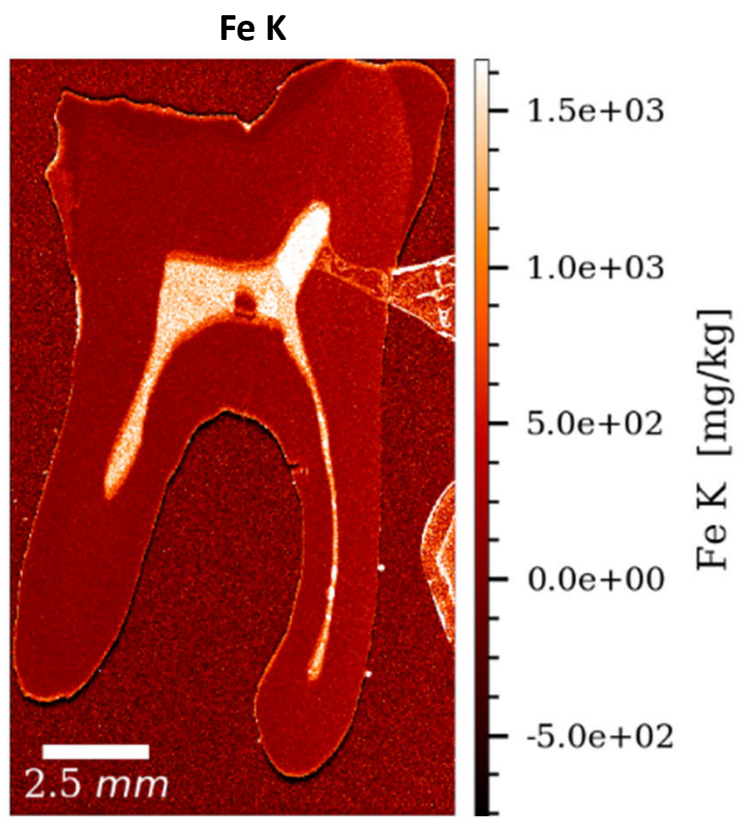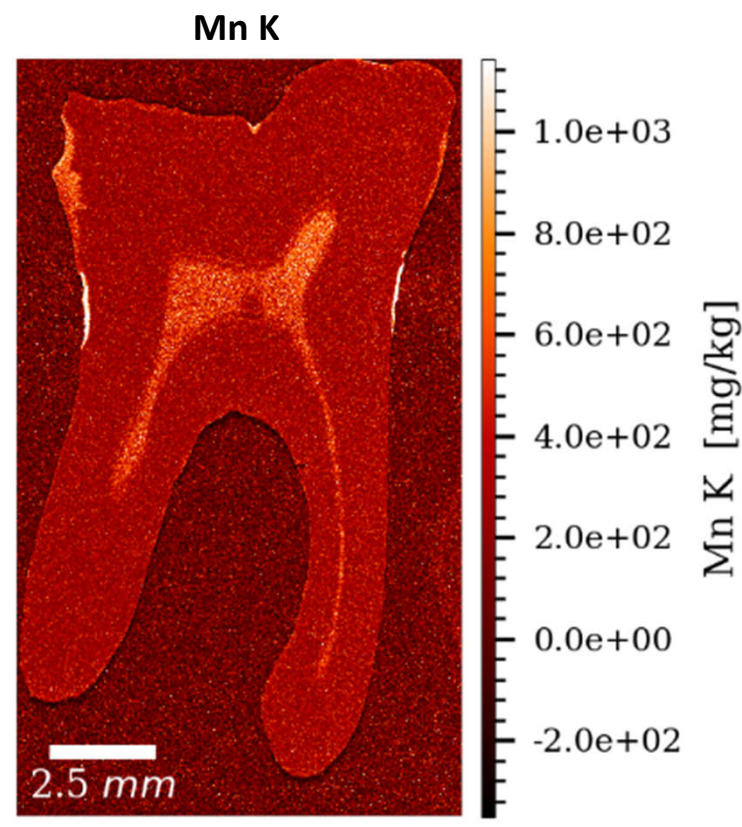



A1651 LRM1

Overview at 10  $\mu\text{m}$

Uncalibrated data  
(arbitrary units)

Gauss (0.7x0.7)

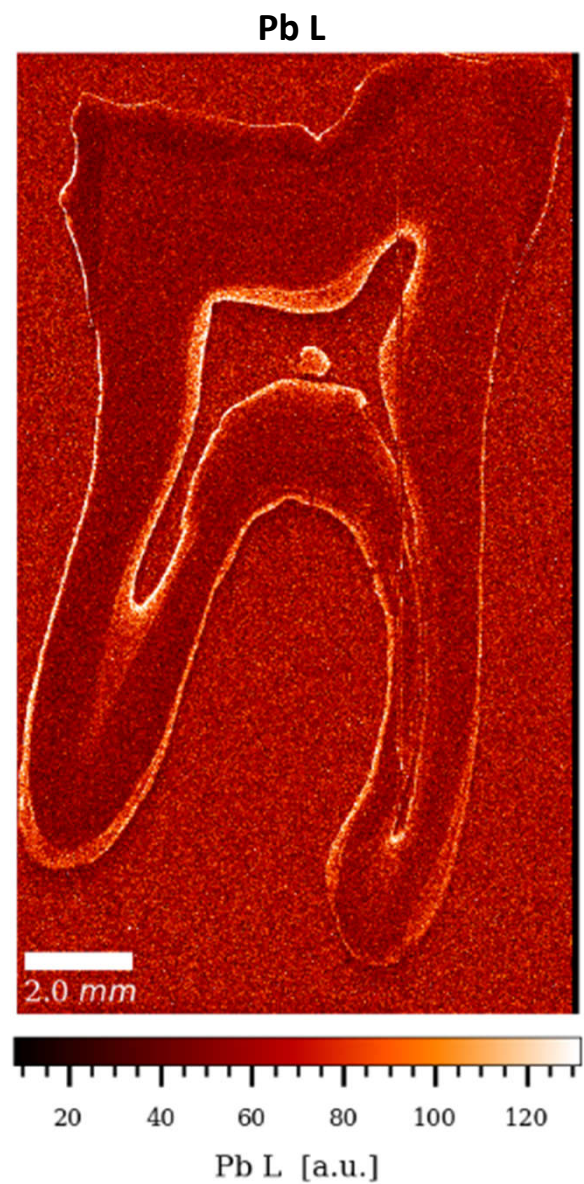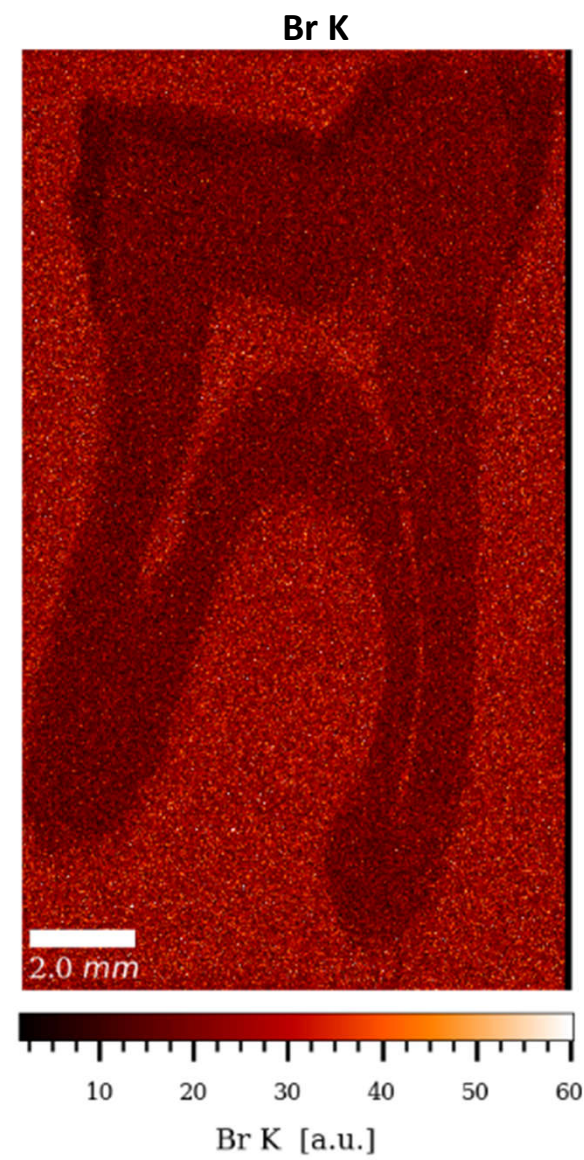

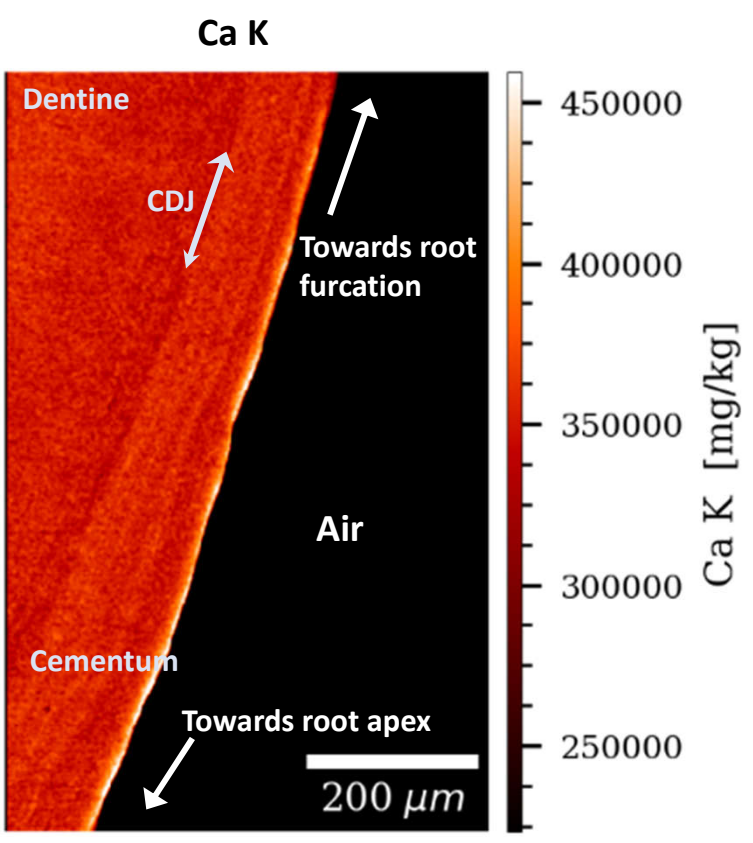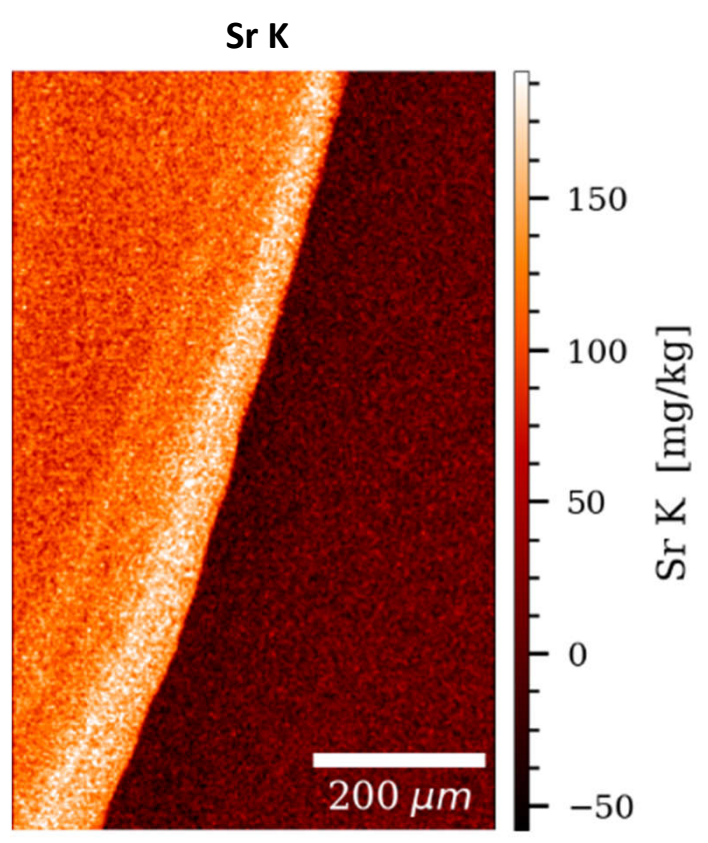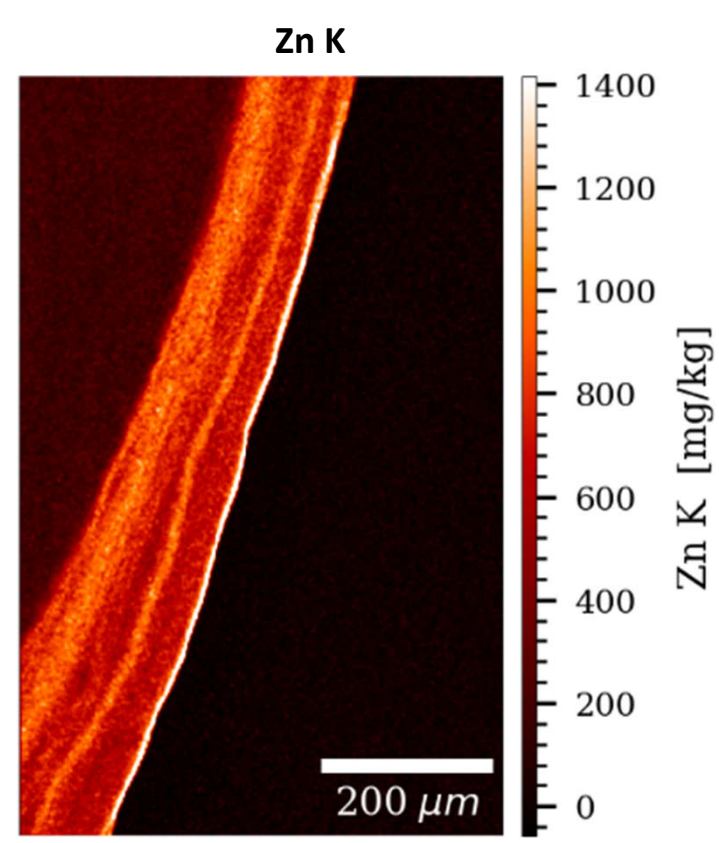



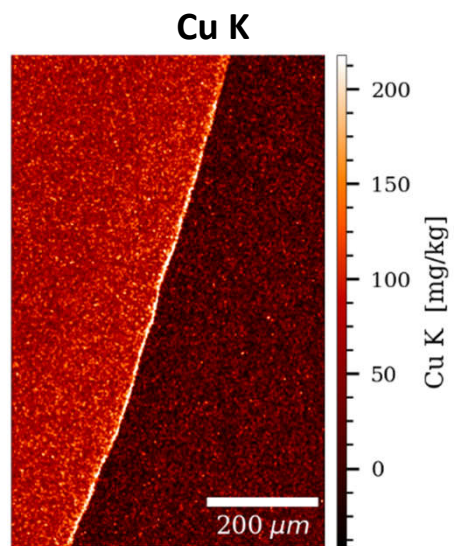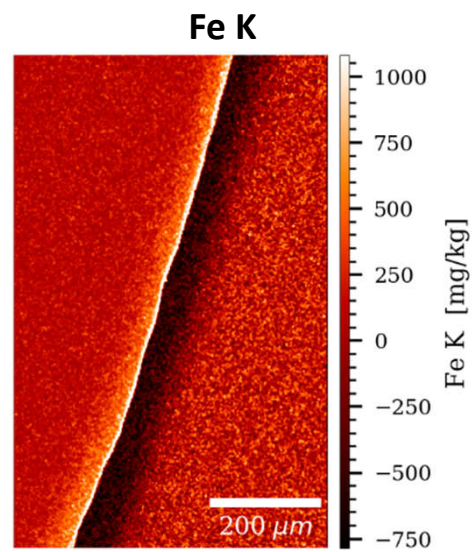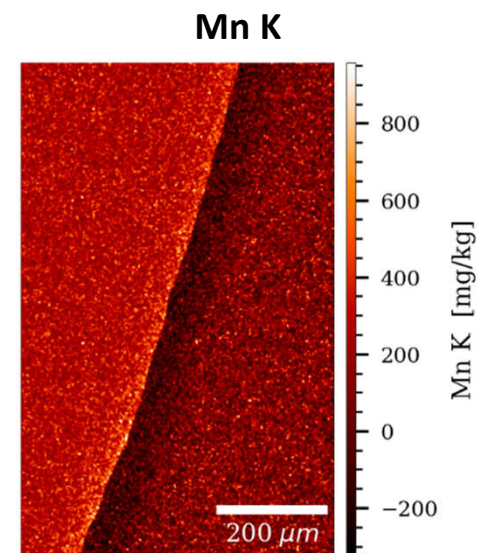



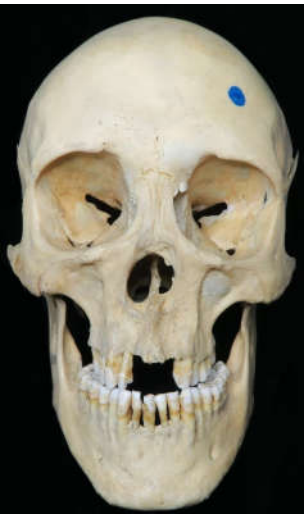

## Romania – A1651 URC

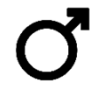

Beginning of 20<sup>th</sup> c.

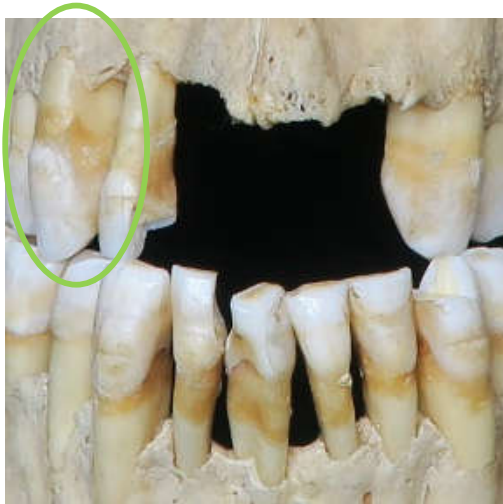

Average tooth section  
thickness ( $\mu\text{m}$ ): 86.2

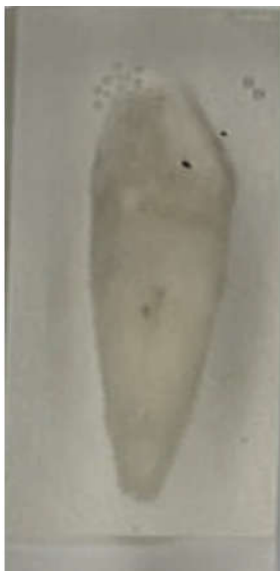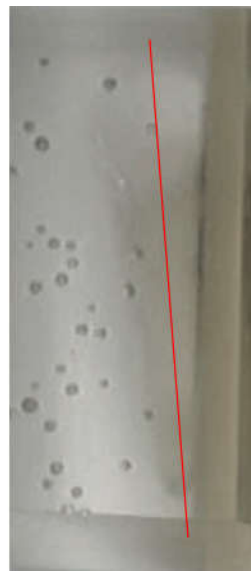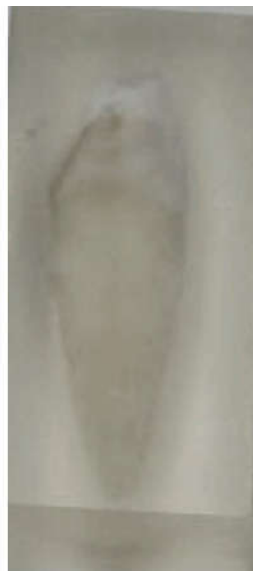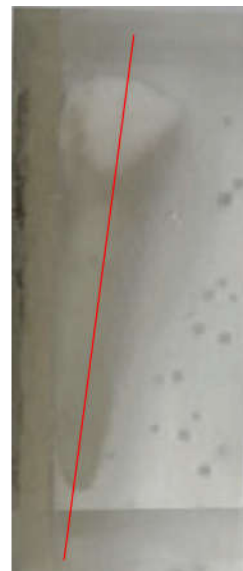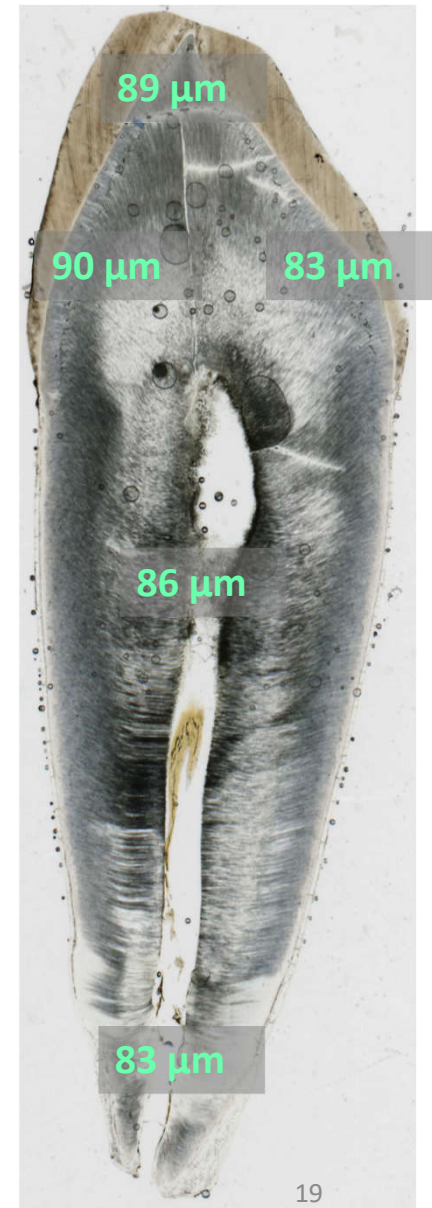

A1651 URC

## Scanning

Overview at 10  $\mu\text{m}$

High resolution at 1  $\mu\text{m}$  in cellular cementum

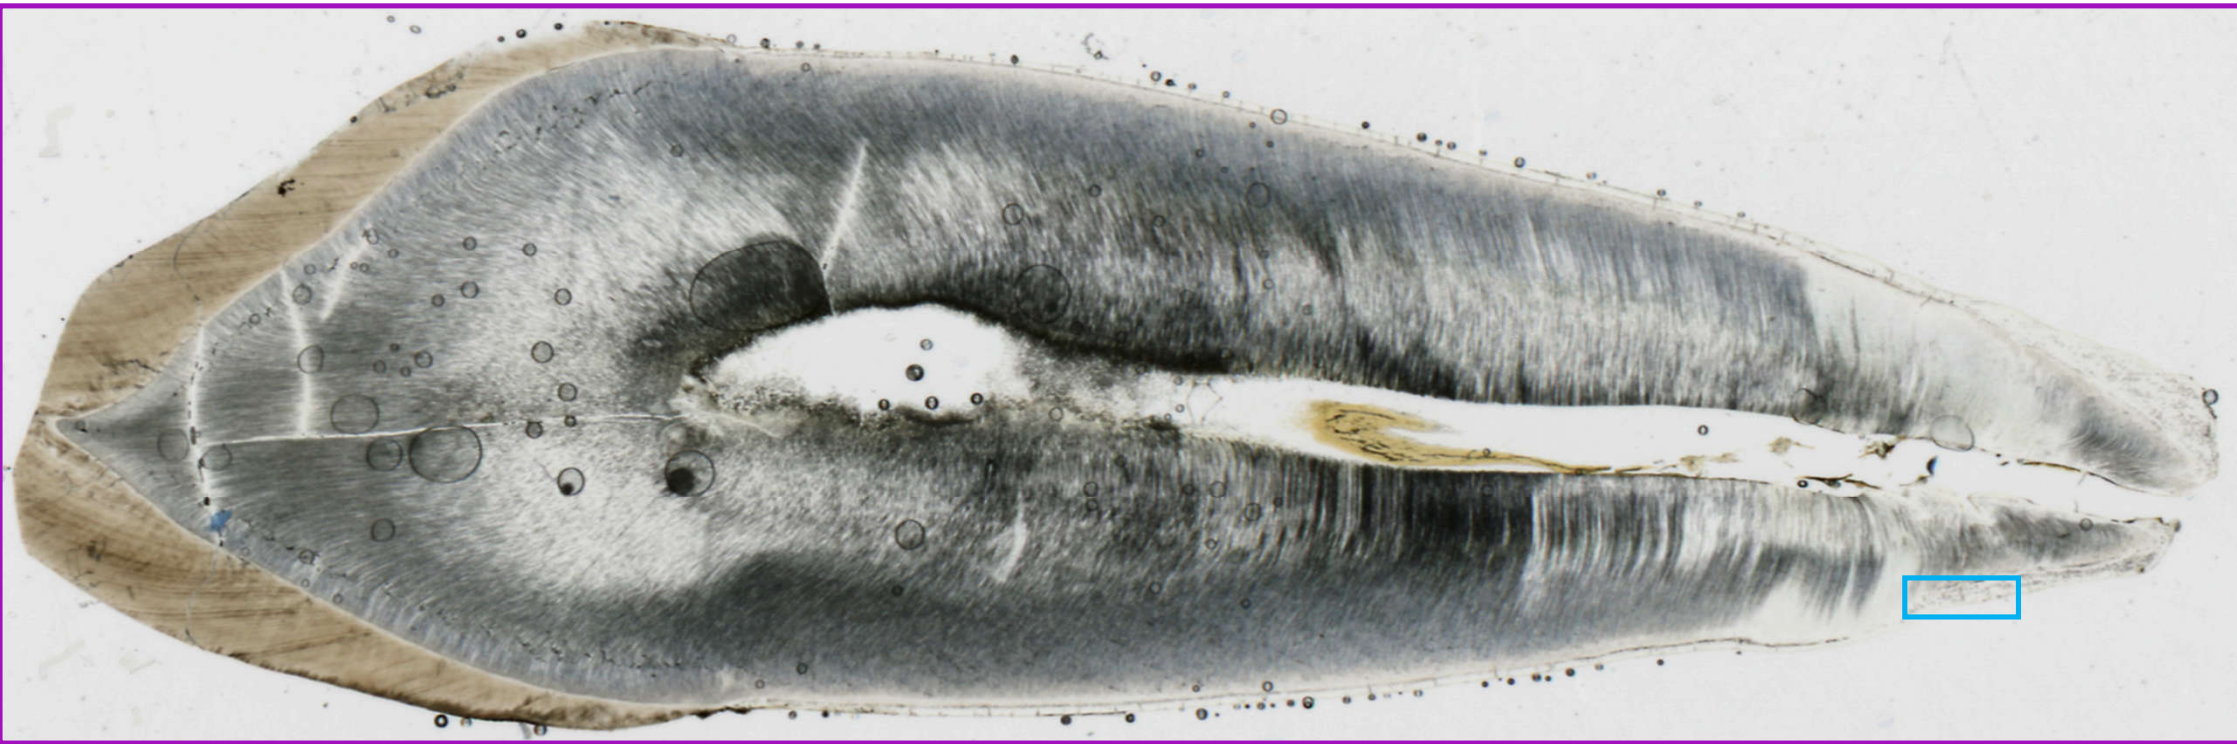



A1651 URC

Overview at 10  $\mu$ m

Gauss (0.9x0.9)

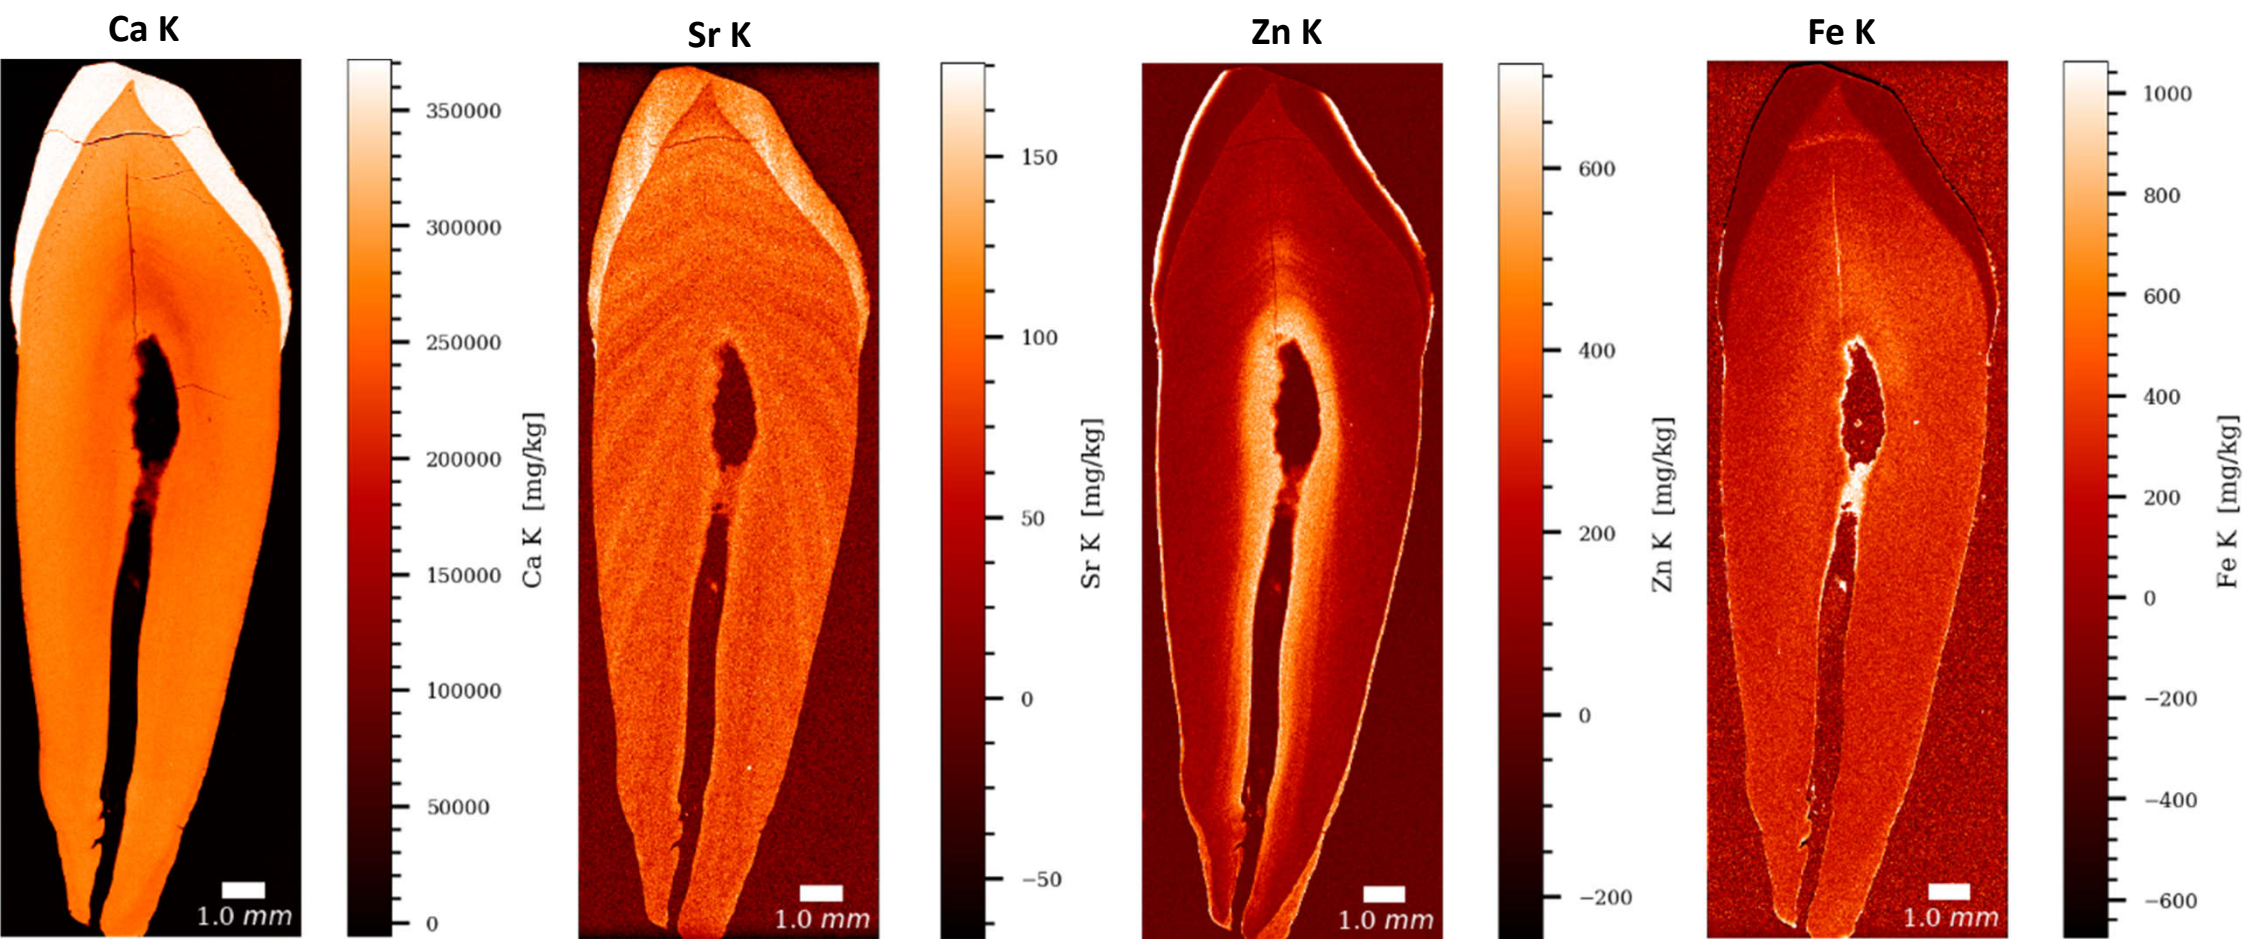

Ca K (optimised for dentine for elemental variations)

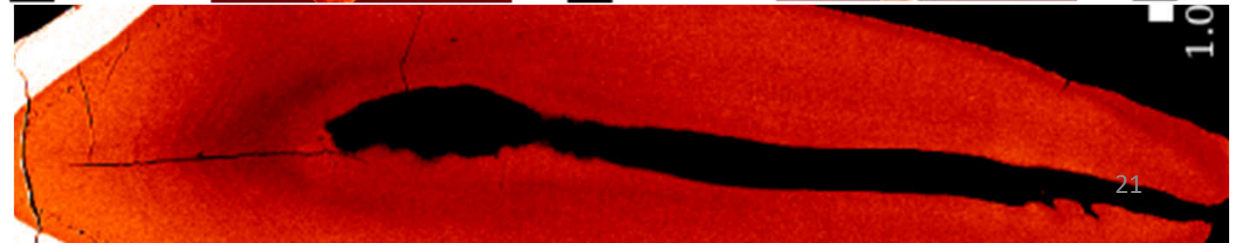

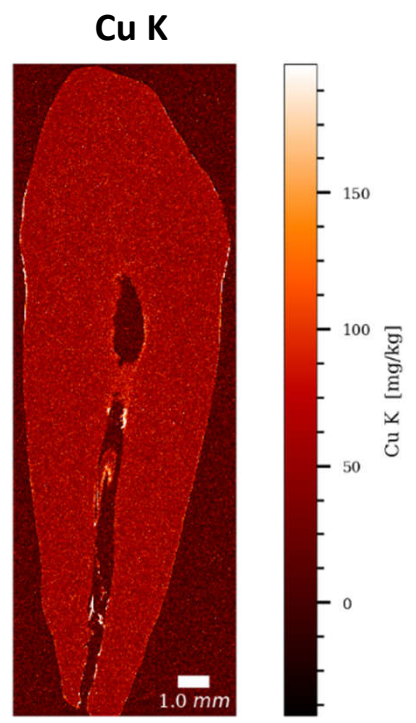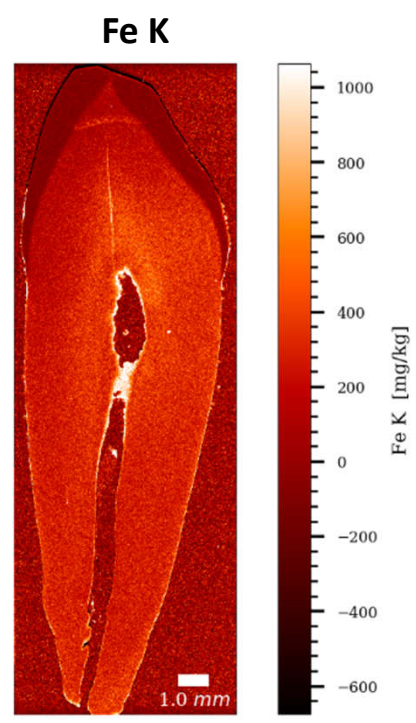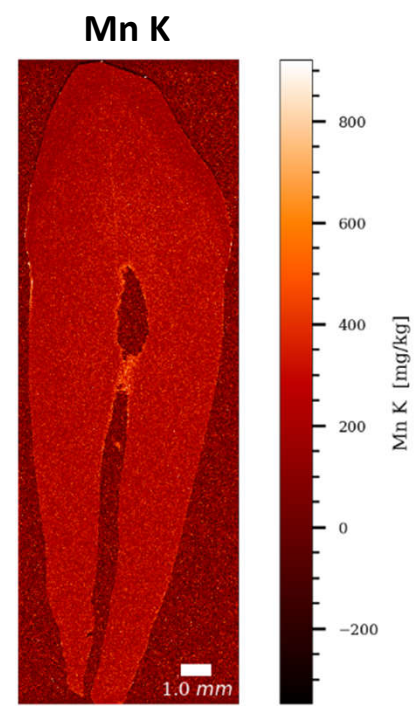



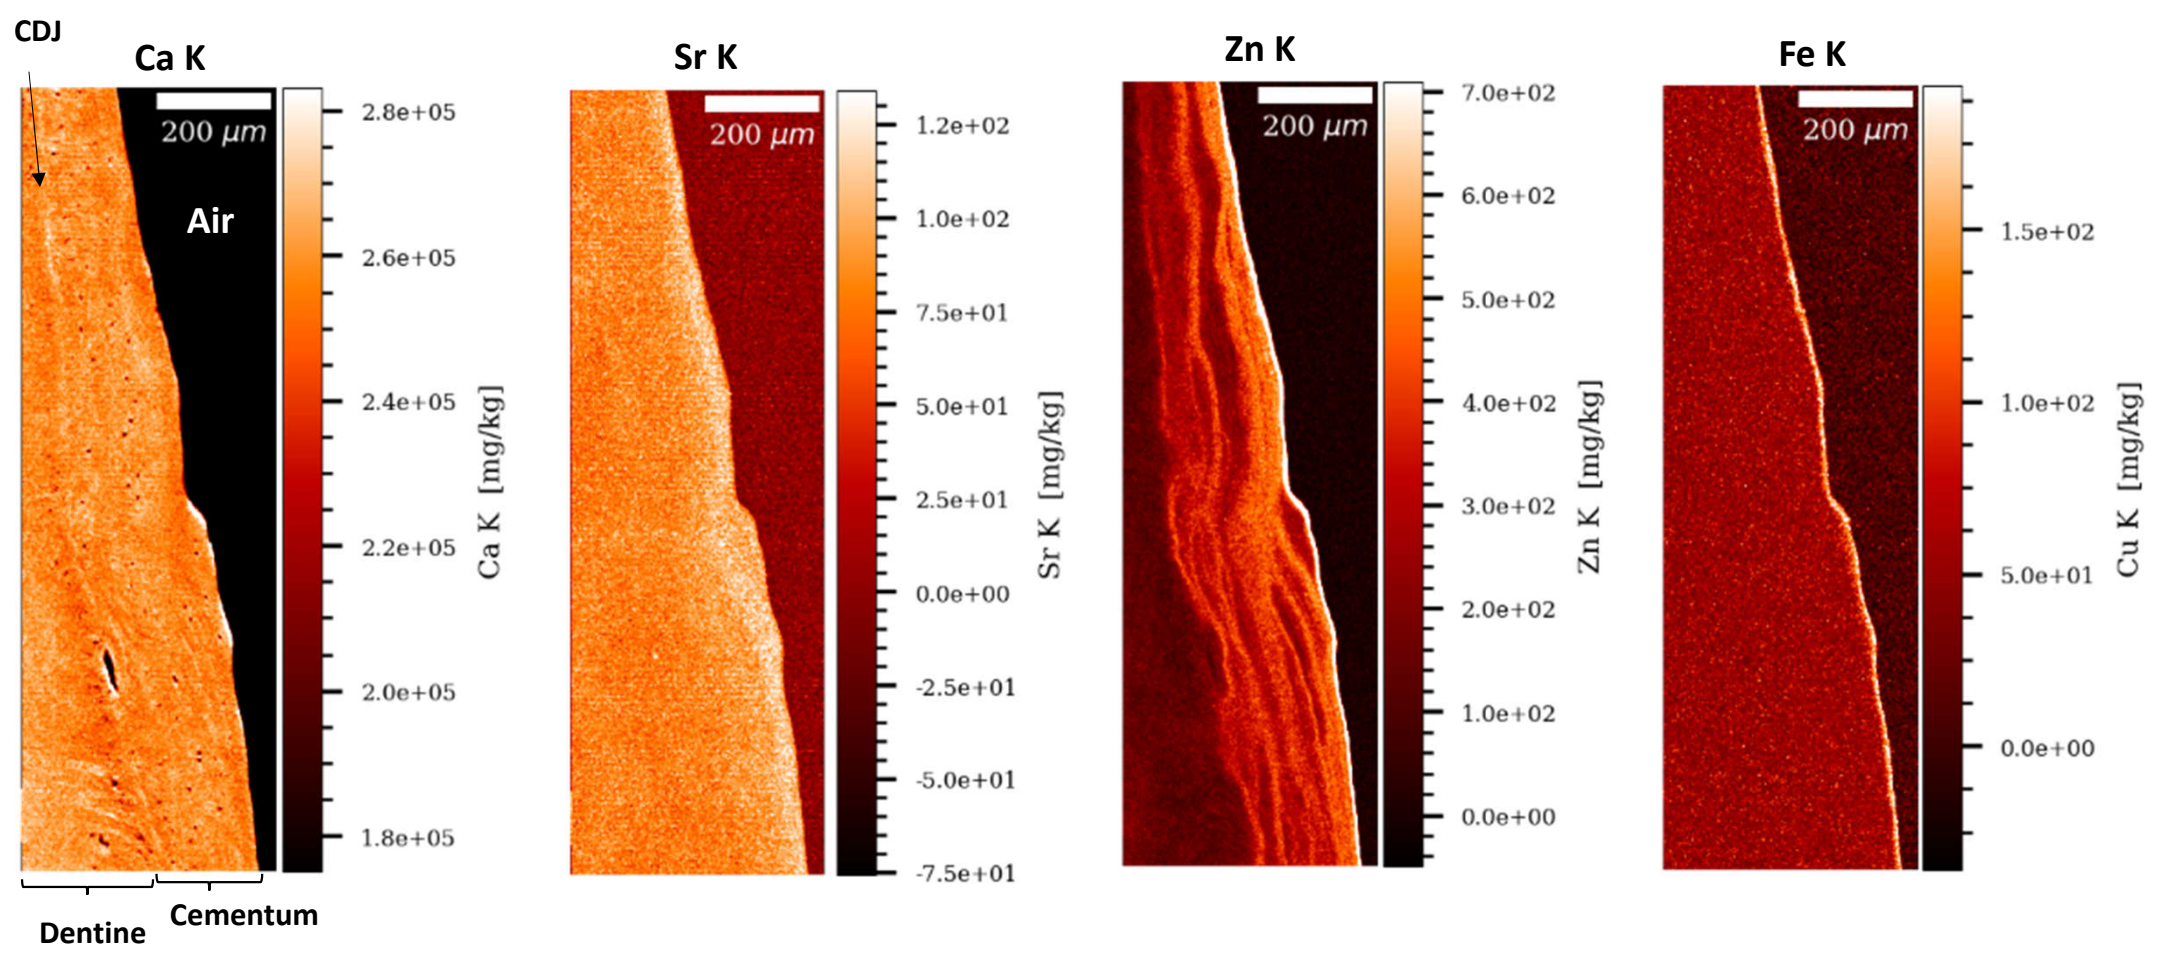

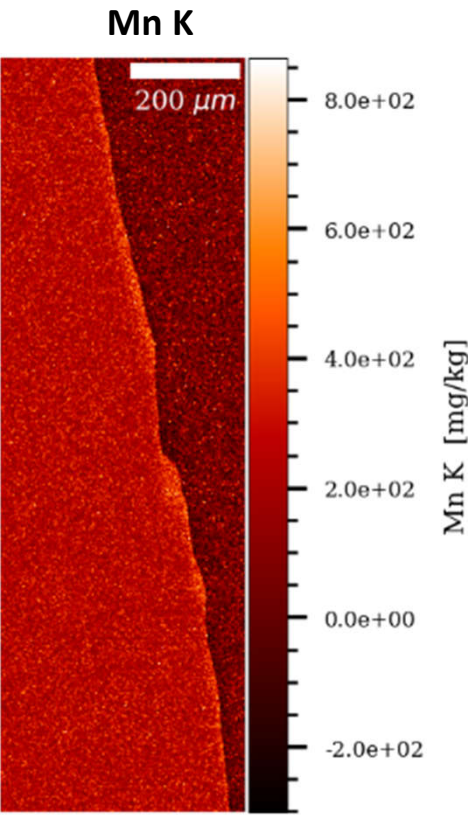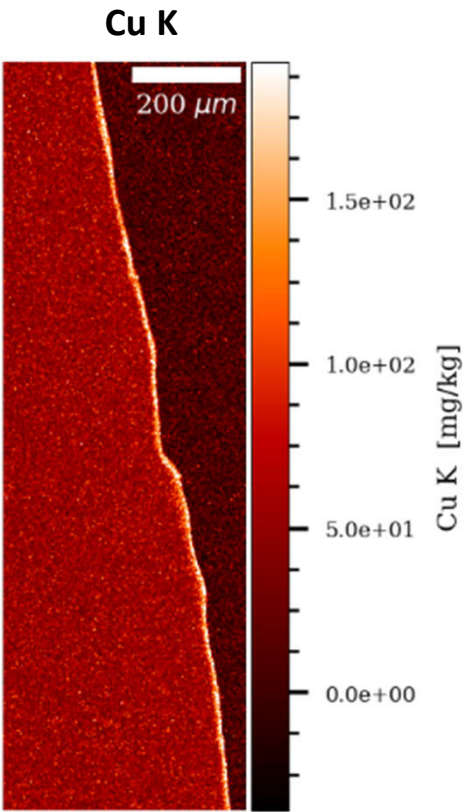

# Odense – 533 LLM1

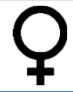

25-35 yrs. 1191 – 1269 cal. CE

mesial

distal

Root apex 2

Root apex 1

Average tooth section thickness ( $\mu\text{m}$ ): 104.0

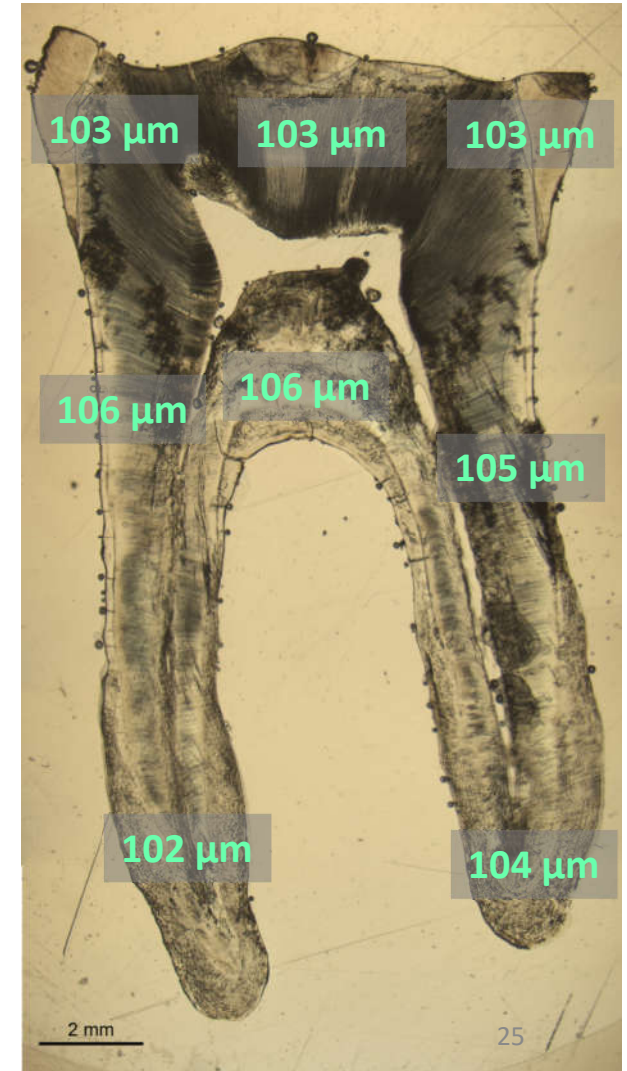



Overview at 10  $\mu\text{m}$

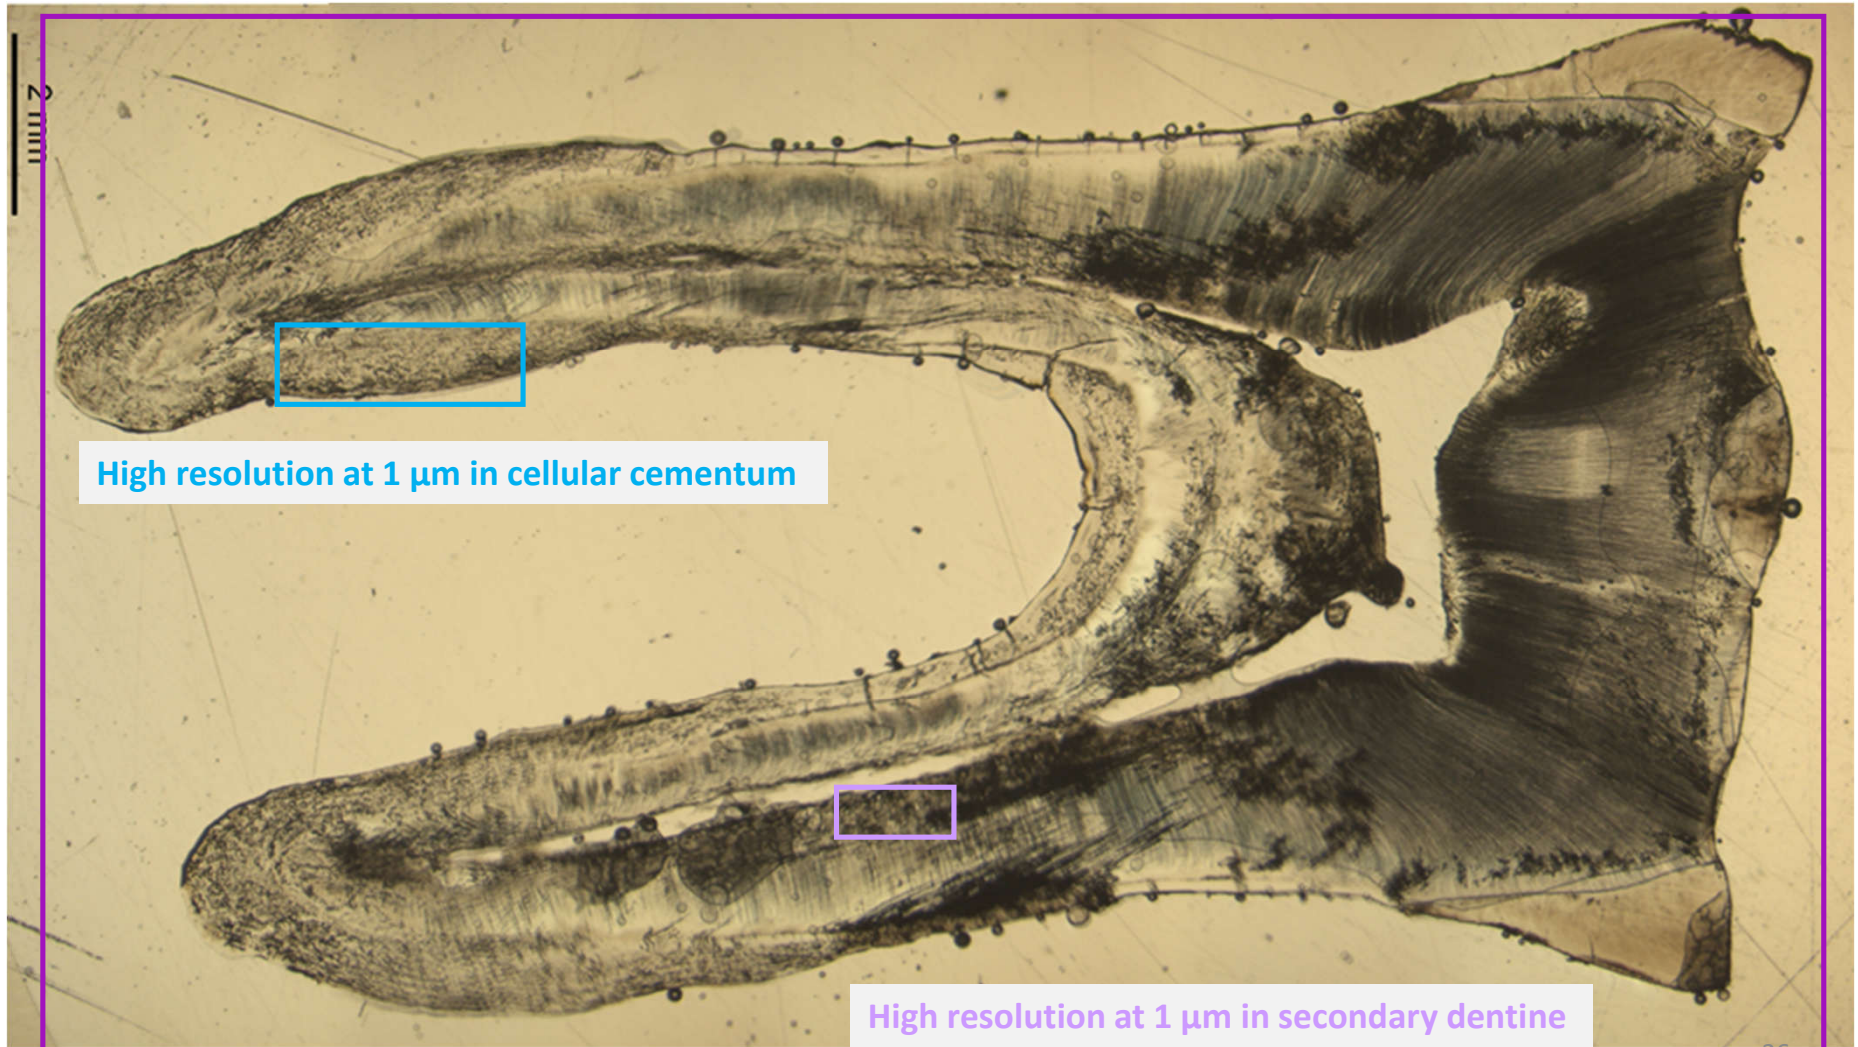

Ca K

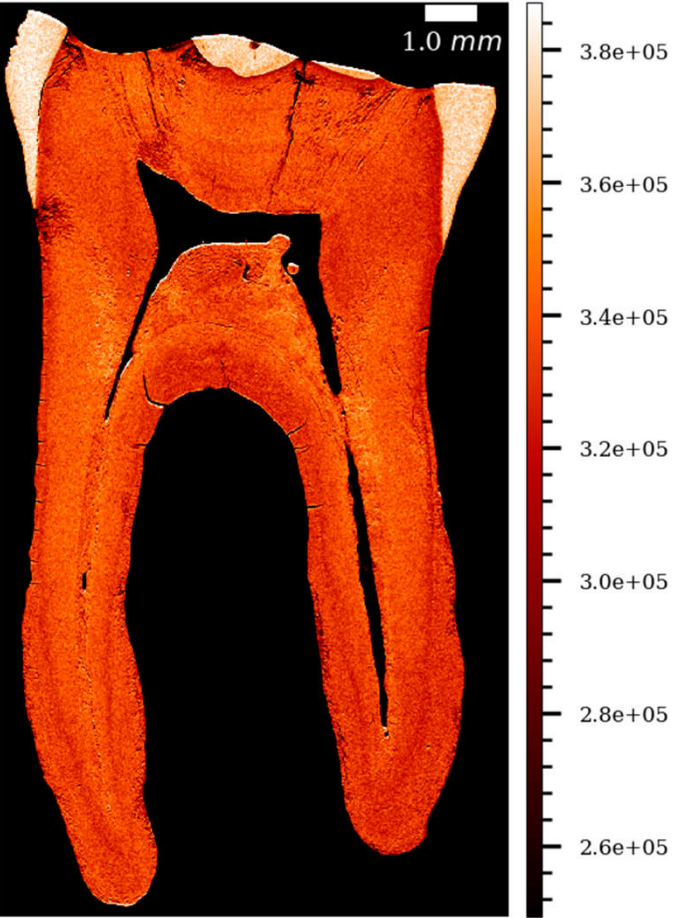

Sr K

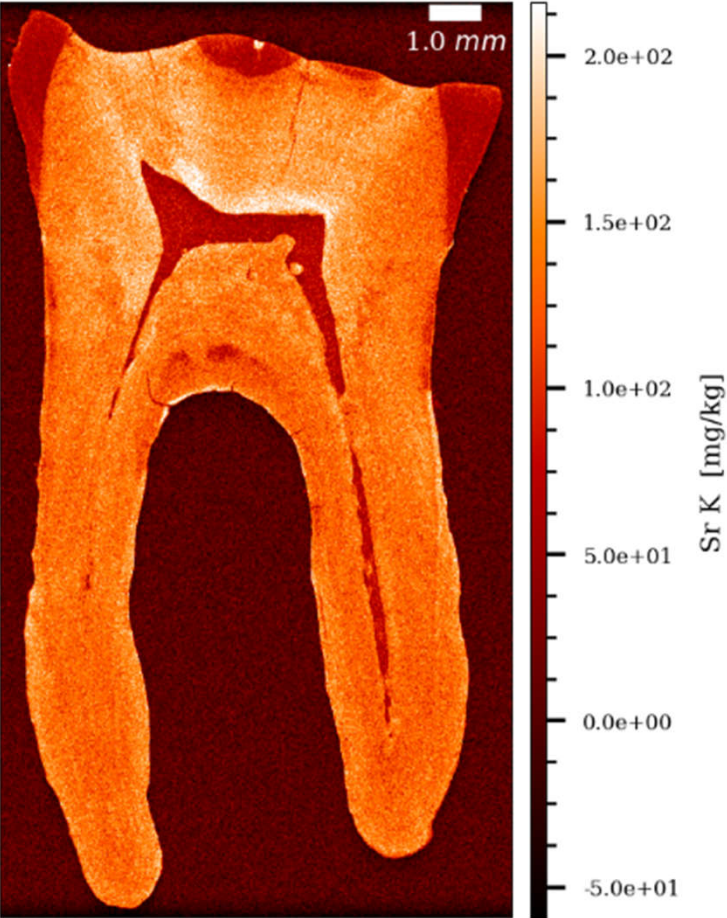

Zn K

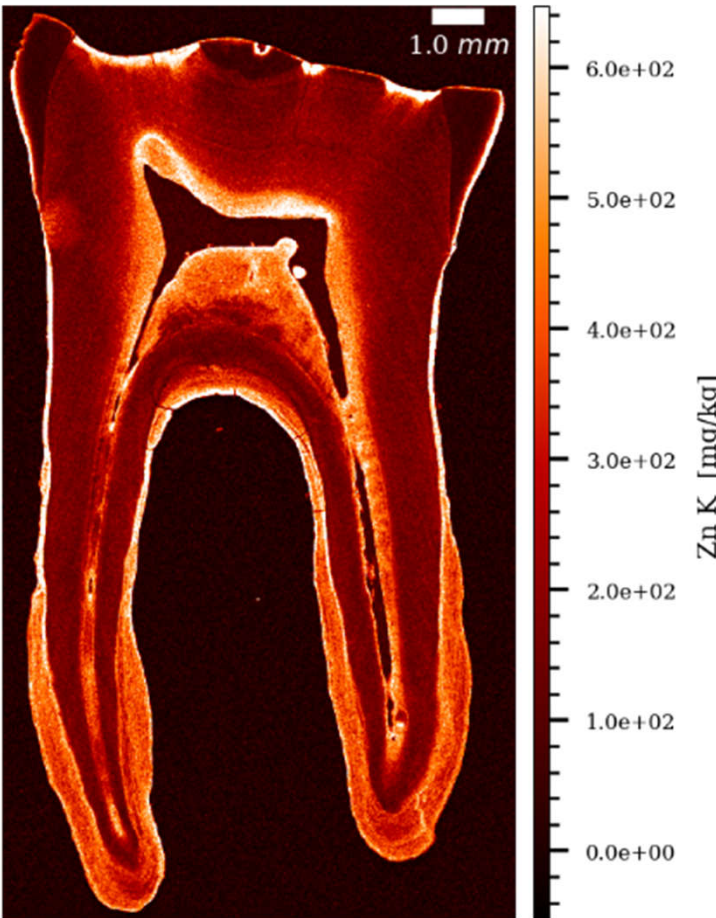



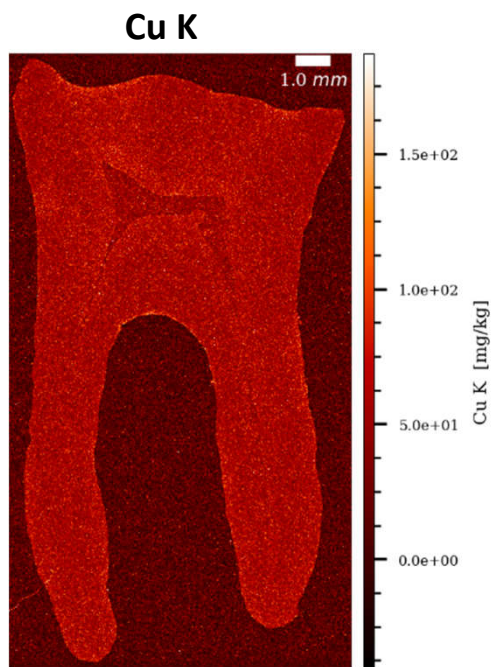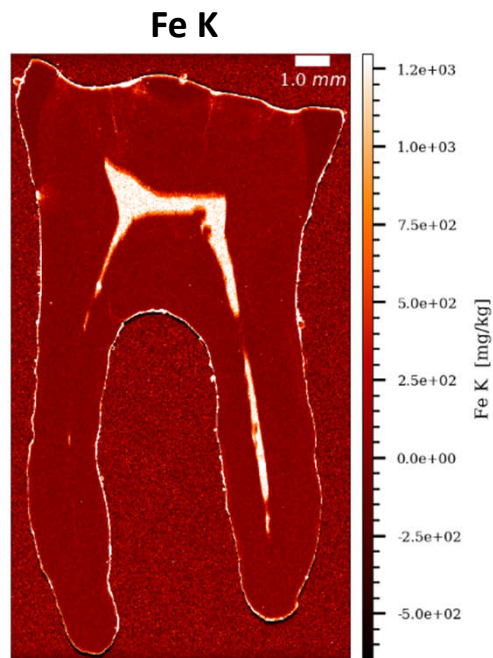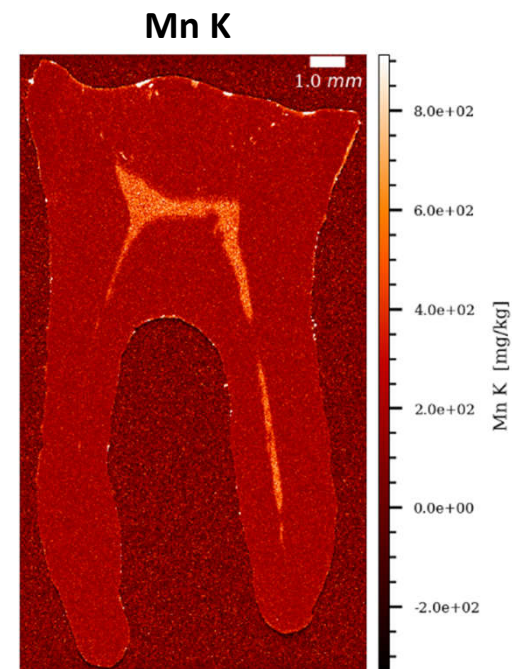

**Odense 533 LLM1**

High resolution at 1  $\mu\text{m}$  in cellular cementum

Gauss (1x1)

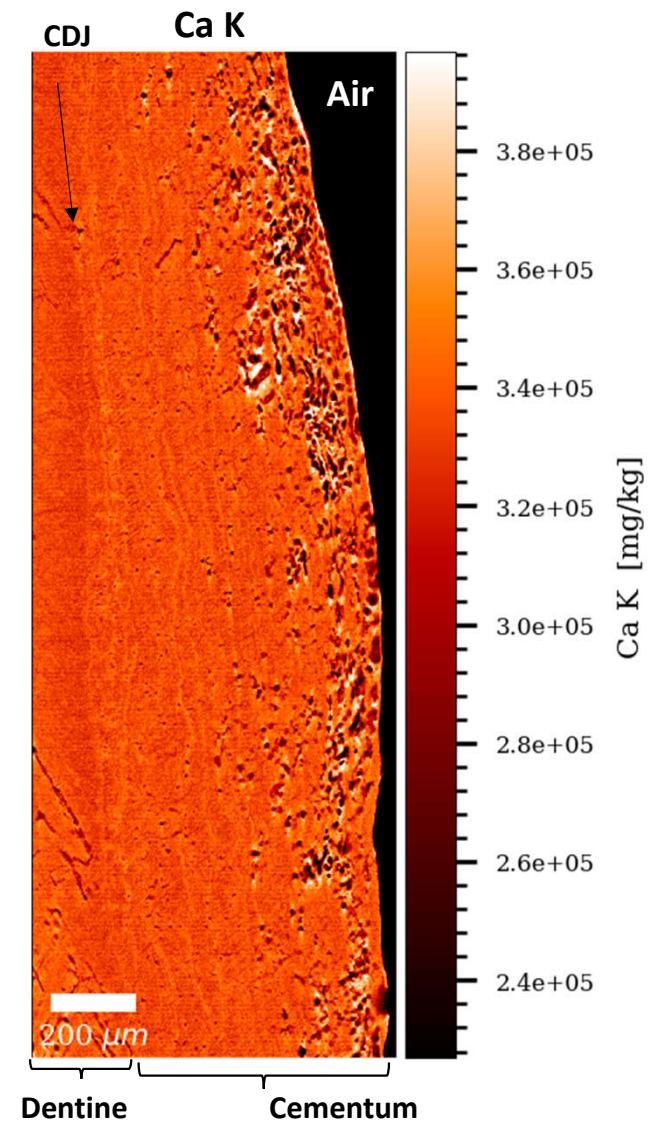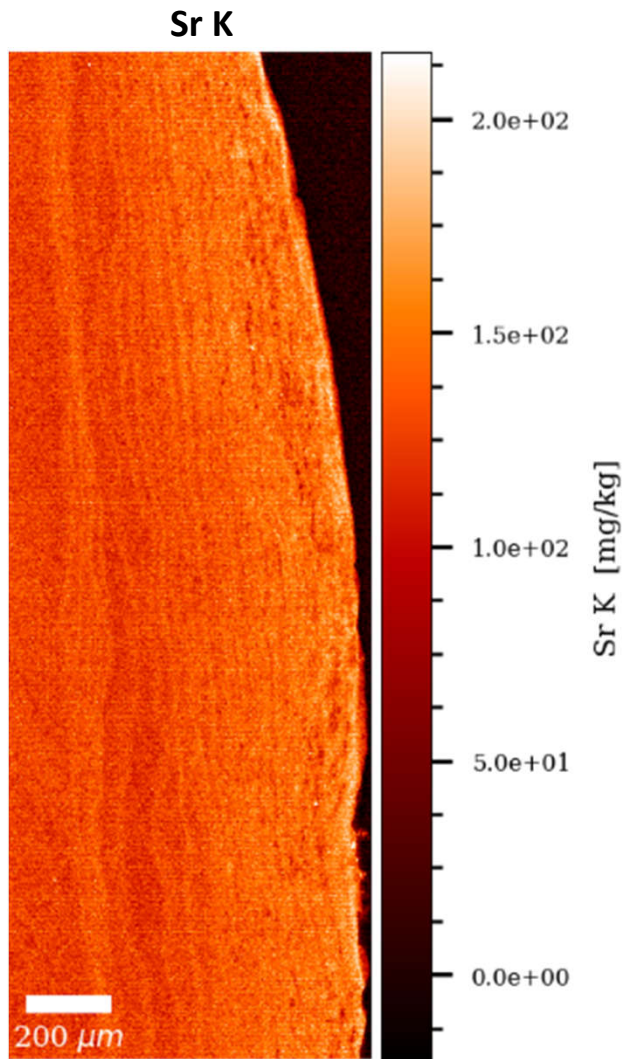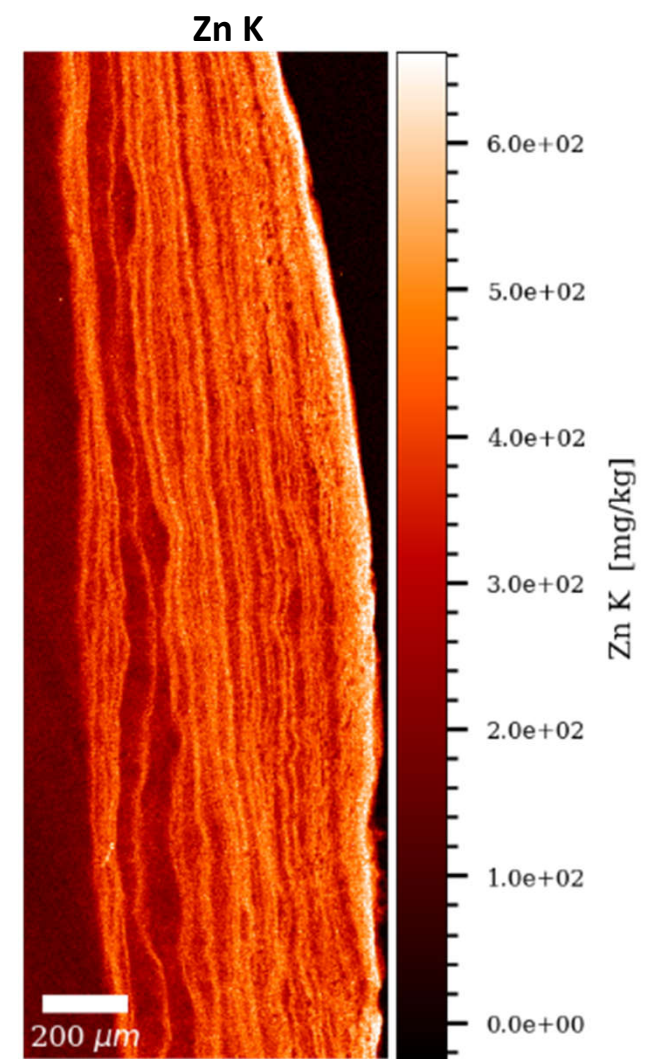



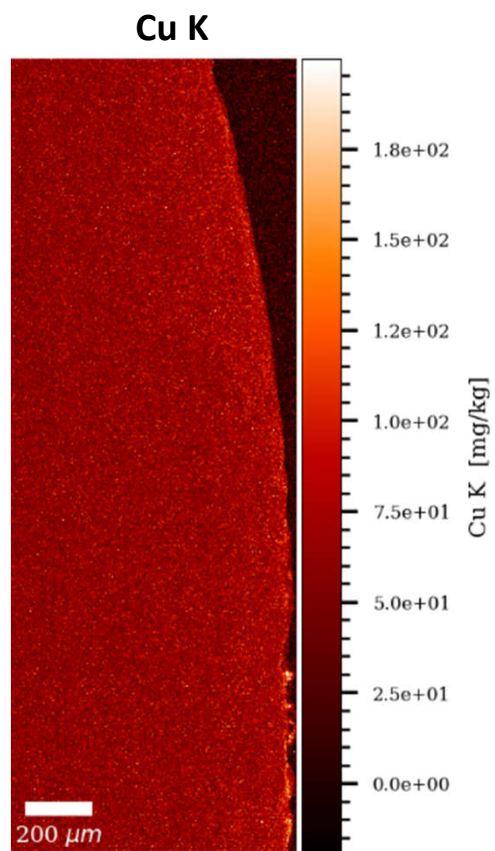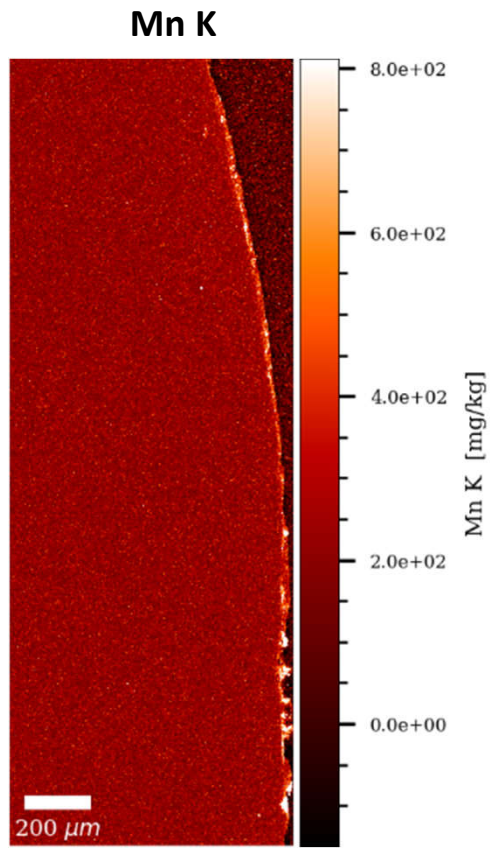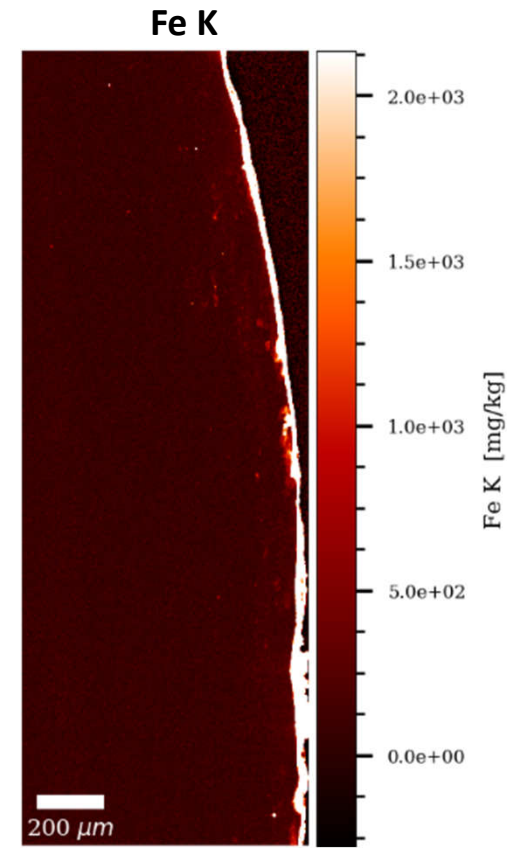

Odense 533 LLM1

High resolution at 1  $\mu$ m in secondary dentine

Gauss (1x1)

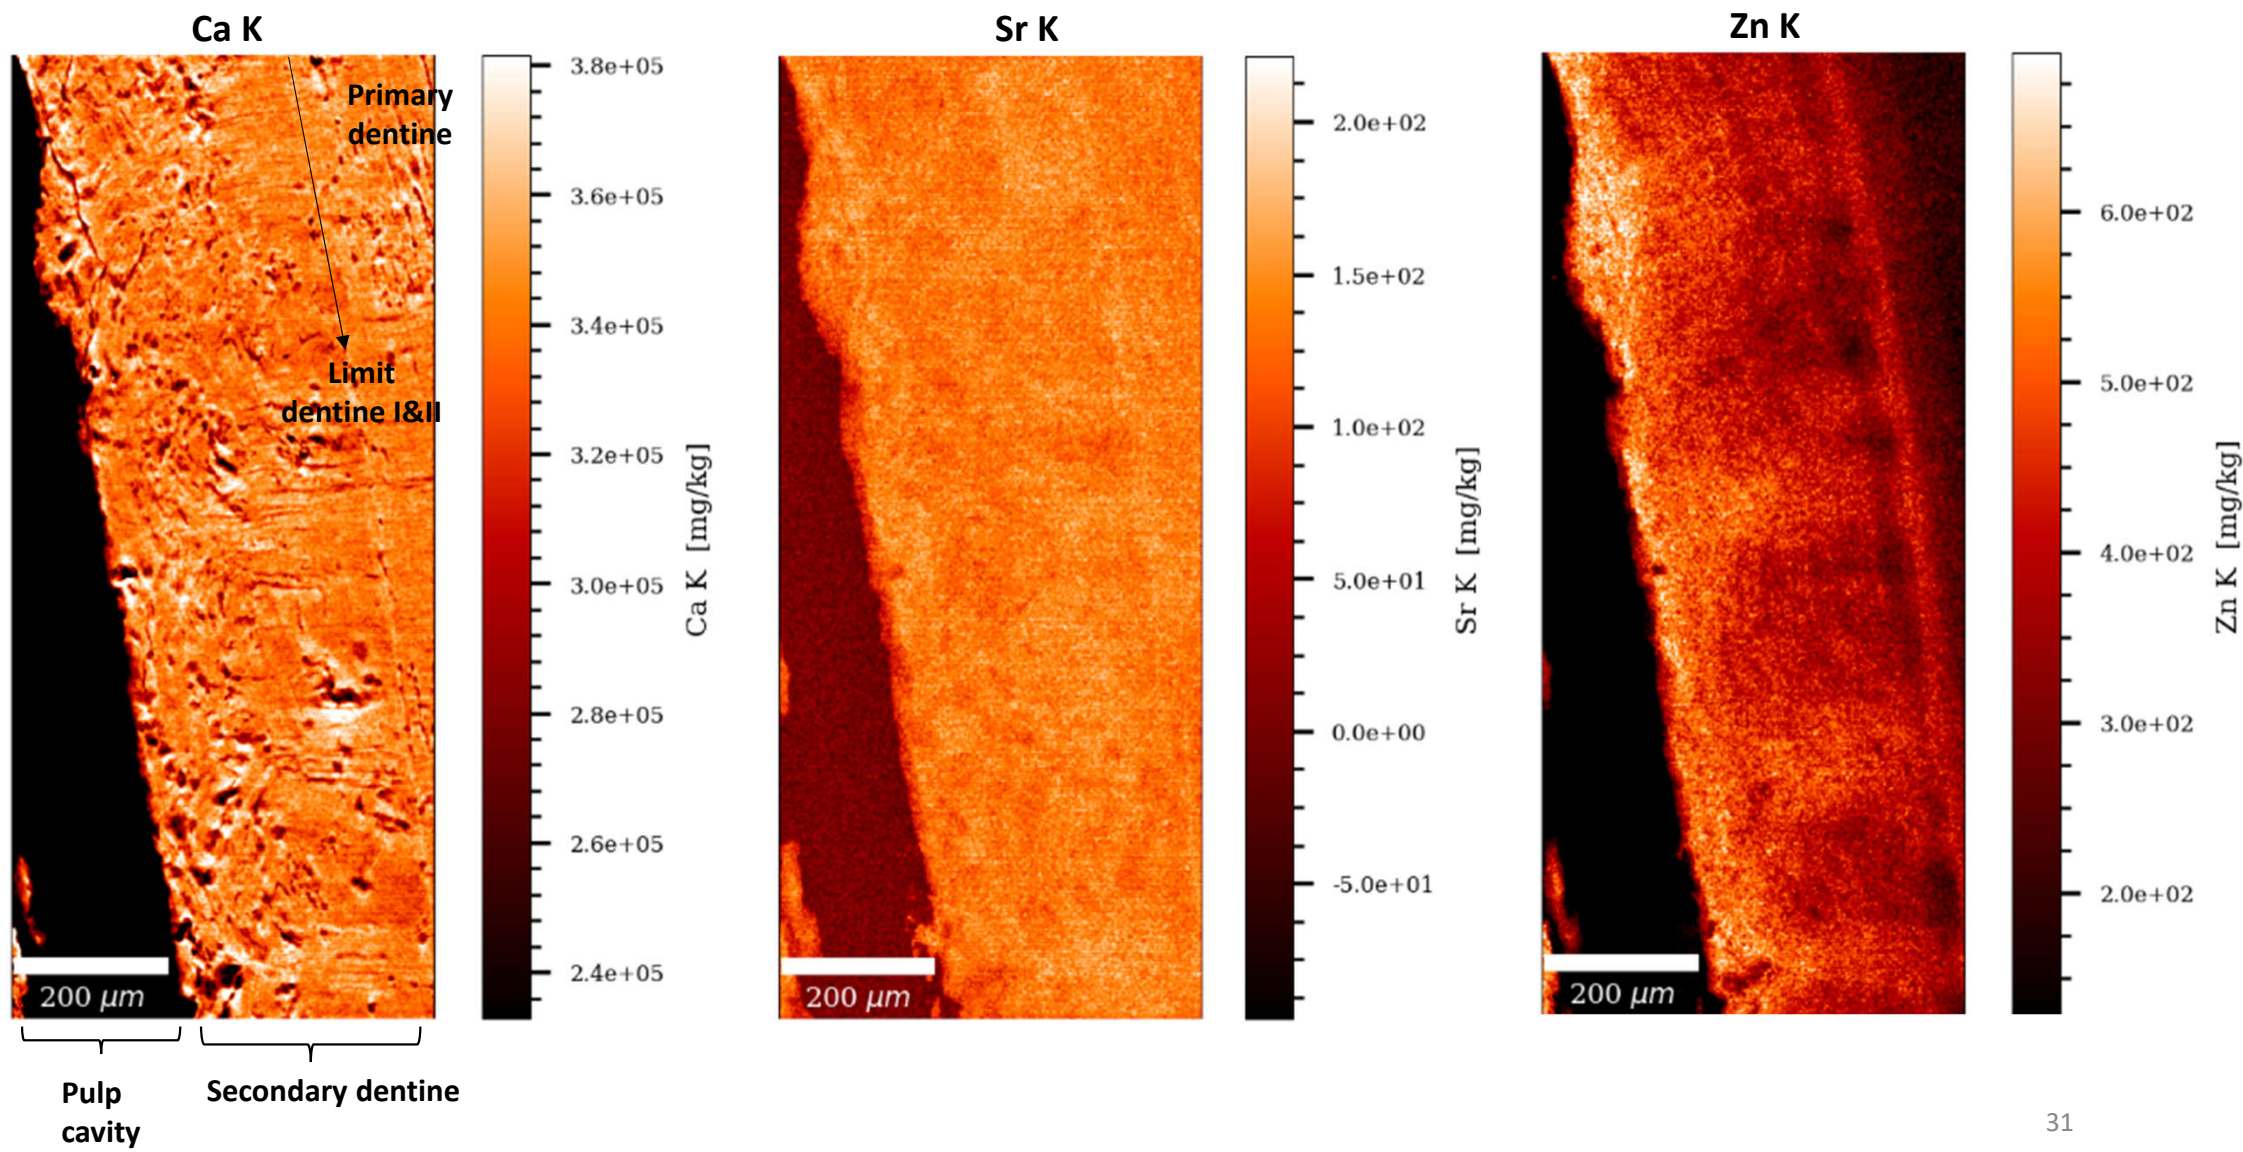



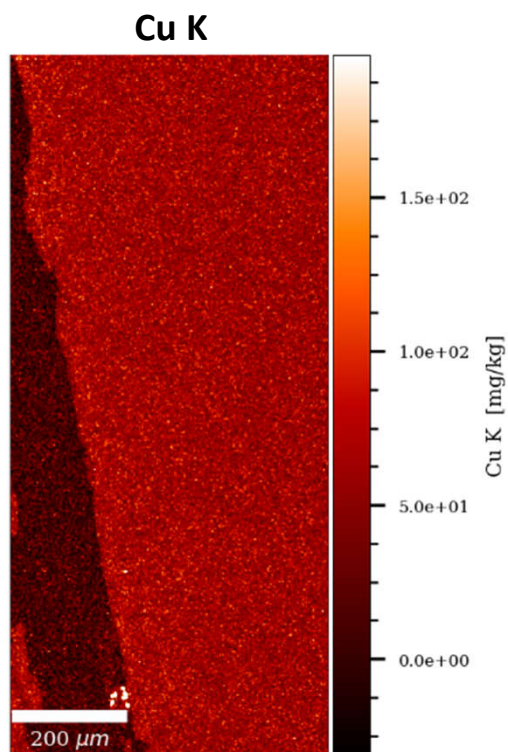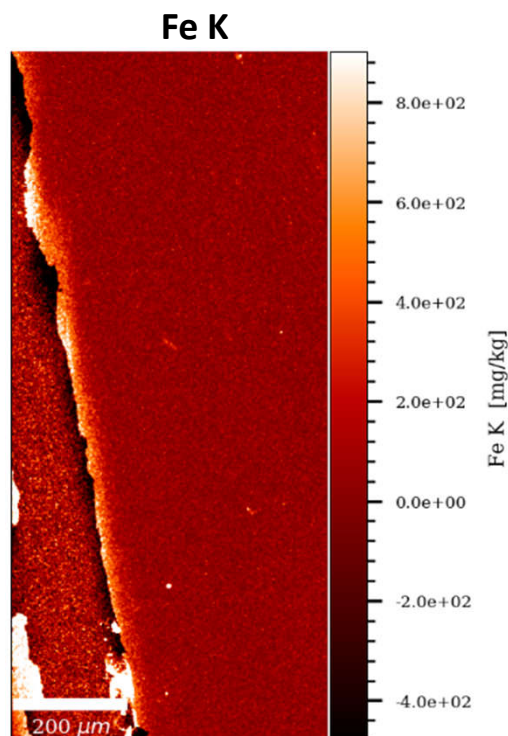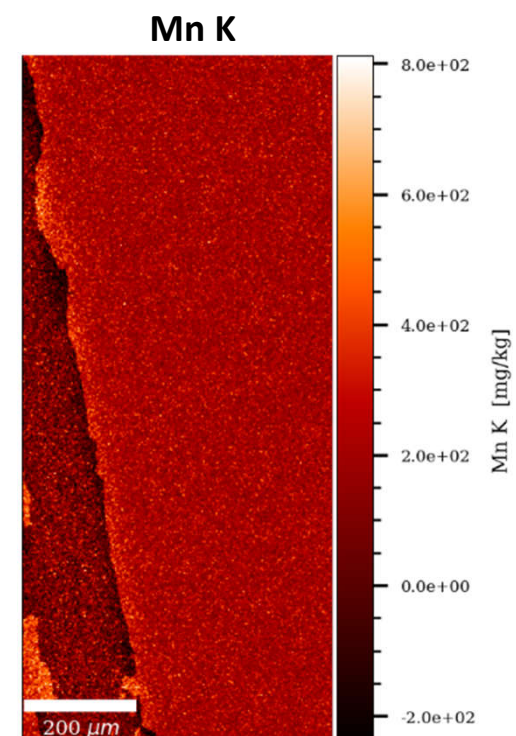



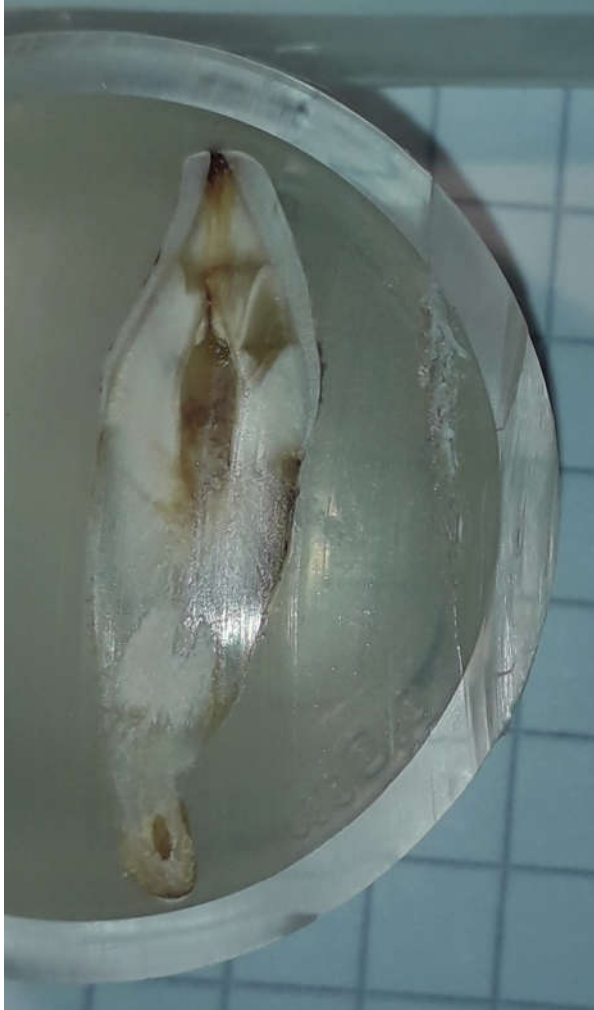

## Odense – 896 LLC

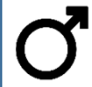

35-45 yrs. 1183 – 1265 cal. CE

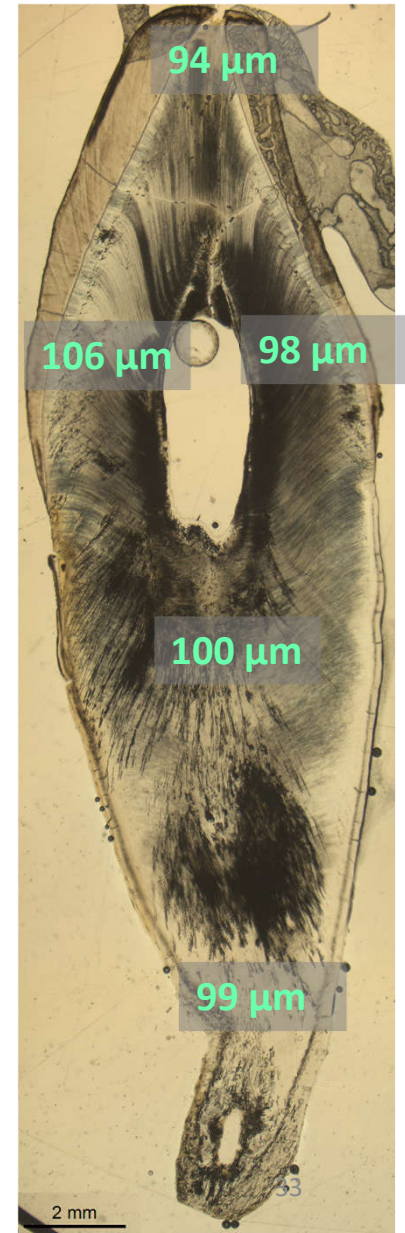

Average tooth section  
thickness (μm): 99.4

Overview at 10  $\mu\text{m}$

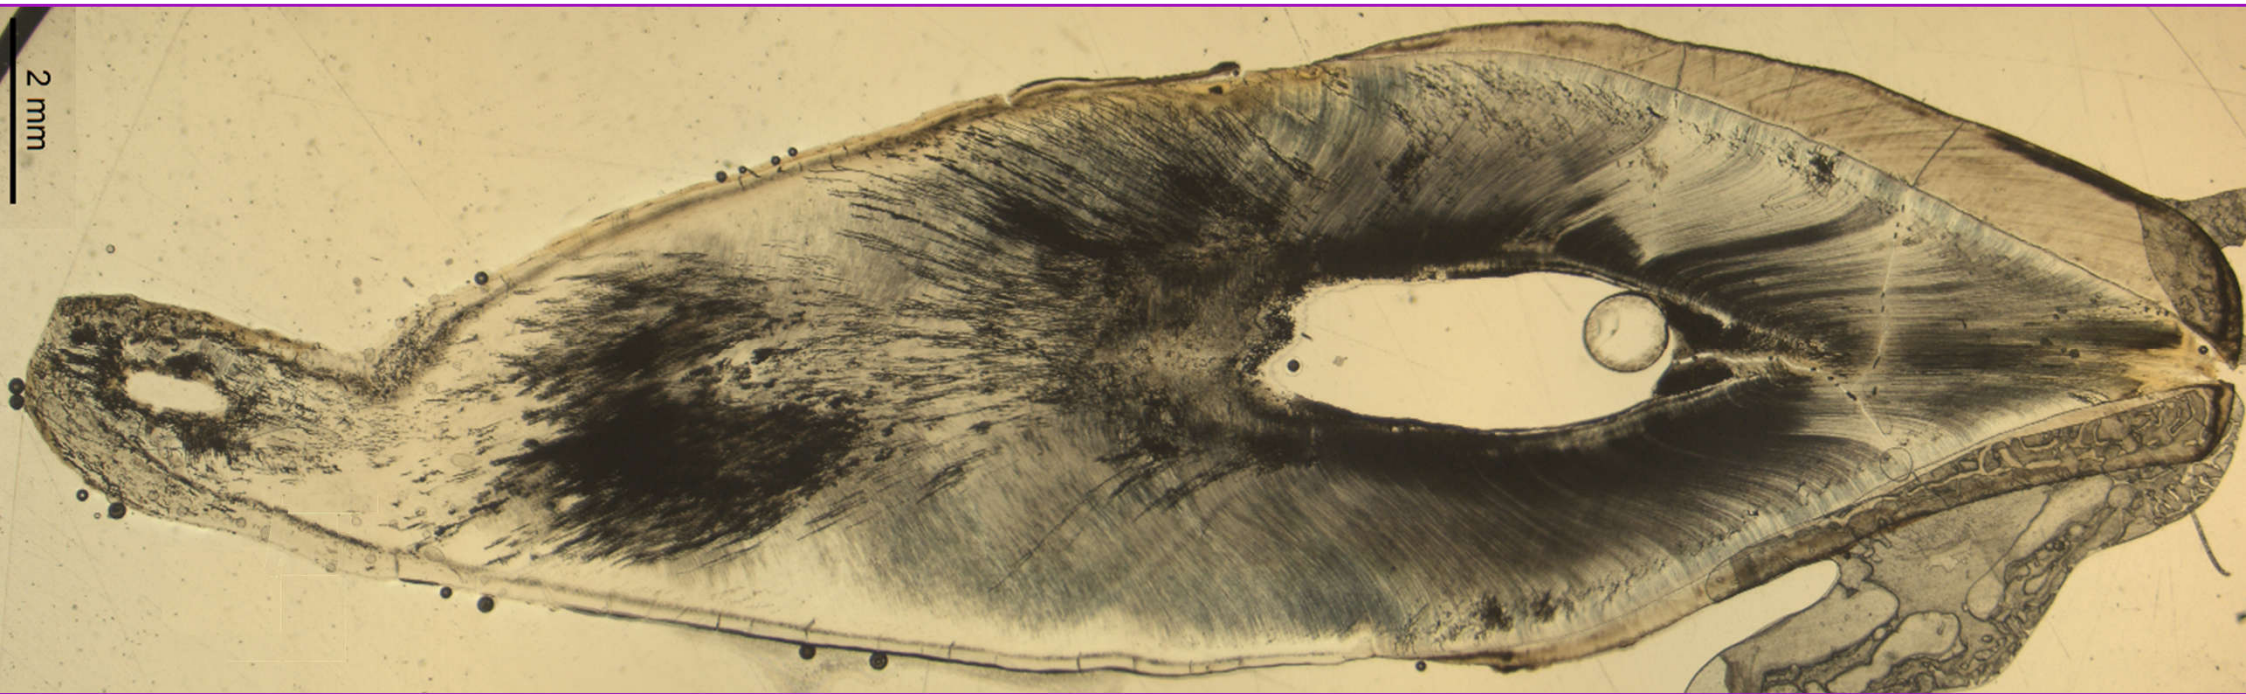



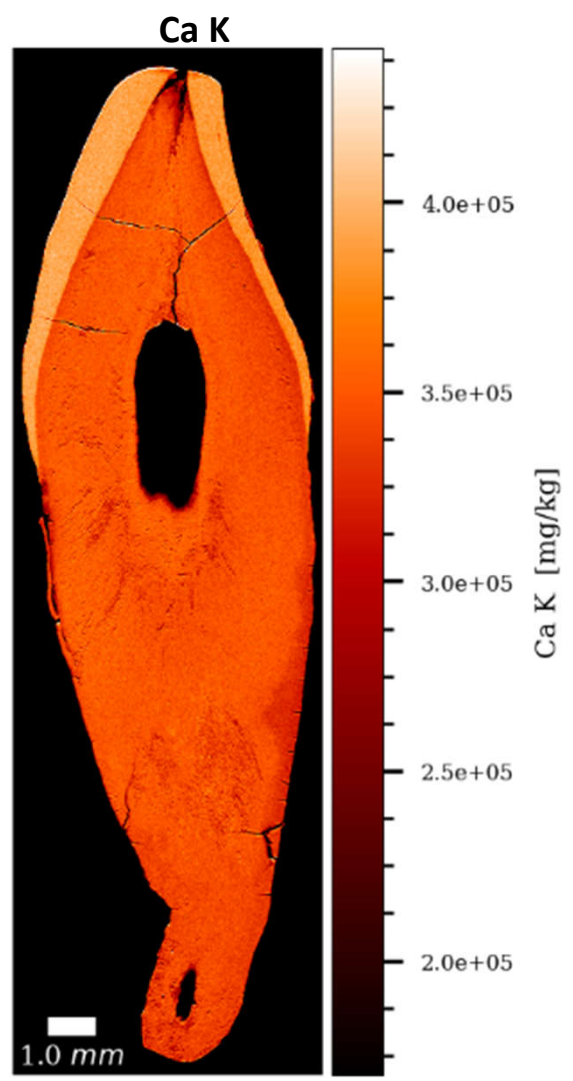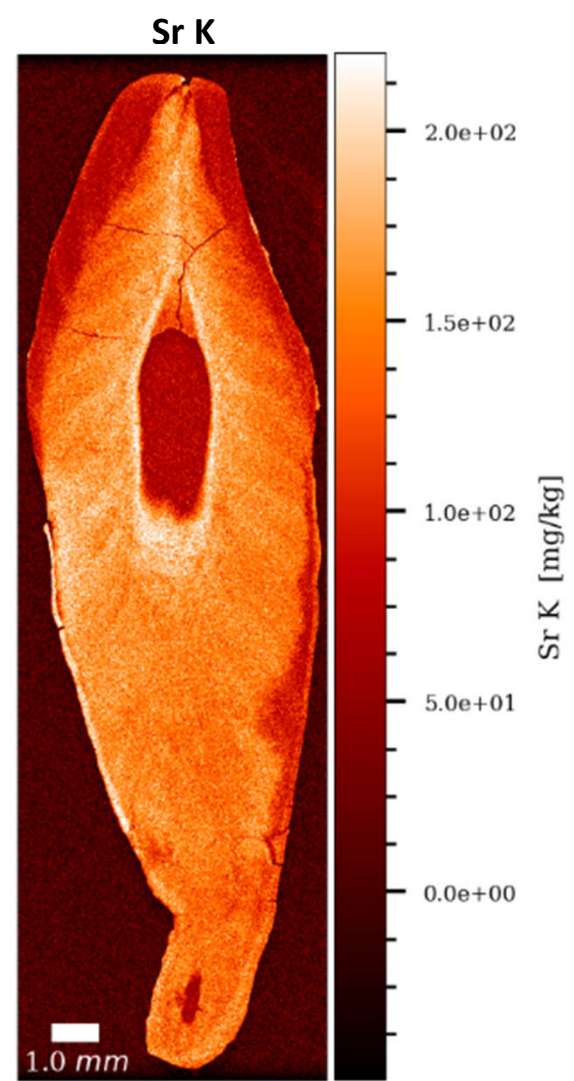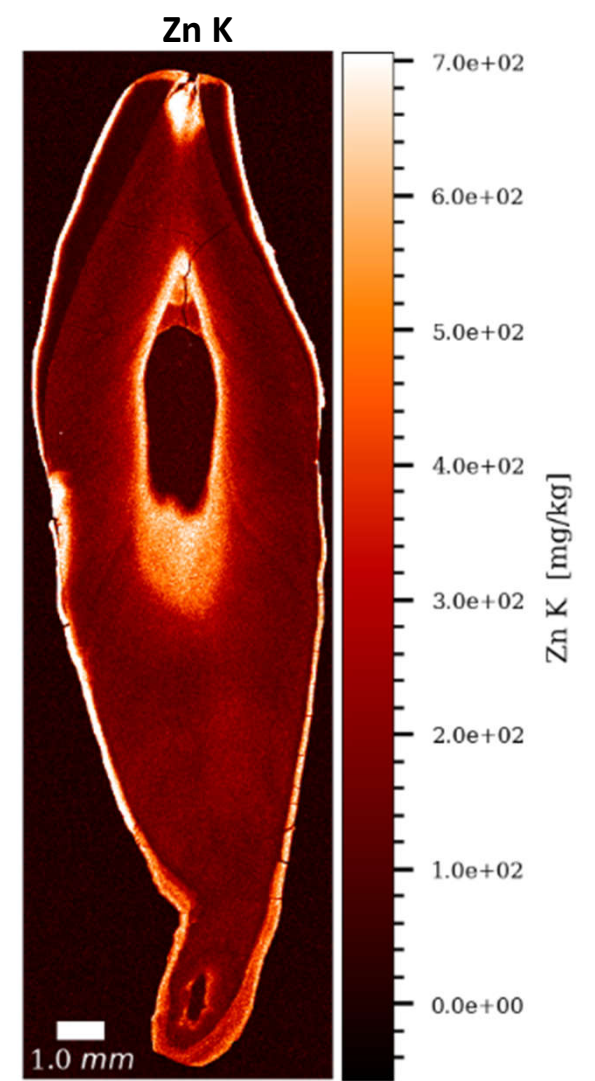

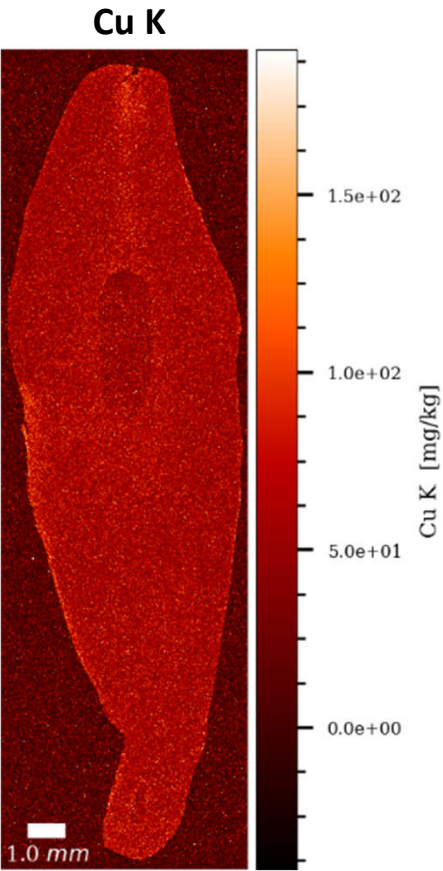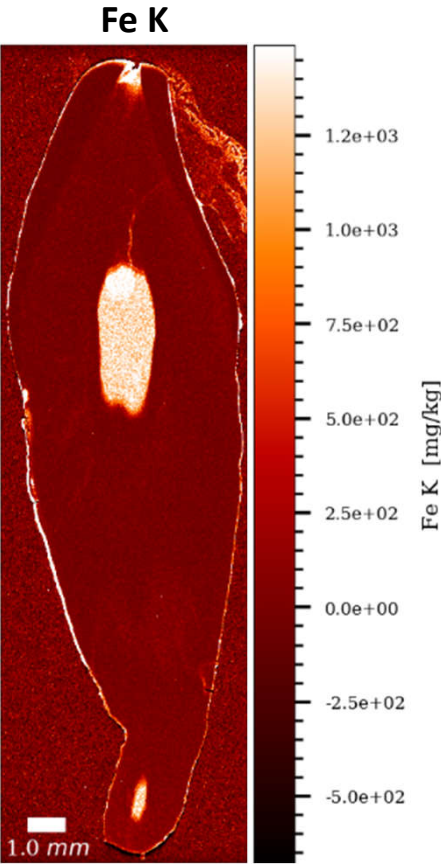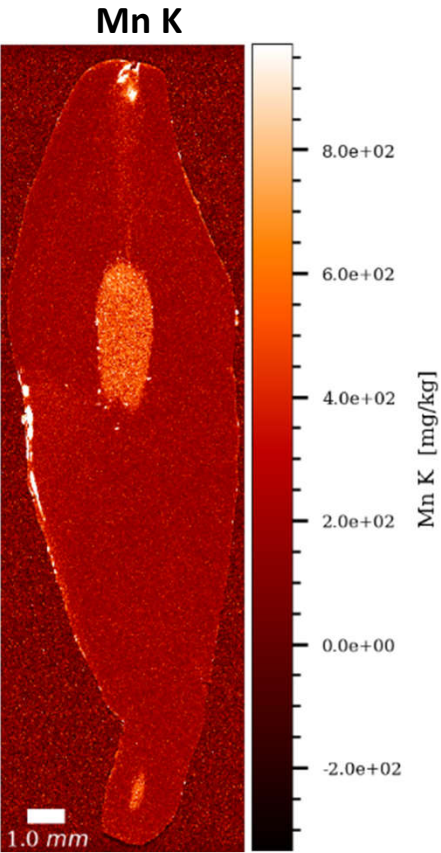



# Odense – 896 LLM1

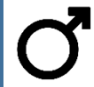

35-45 yrs. 1183 – 1265 cal. CE

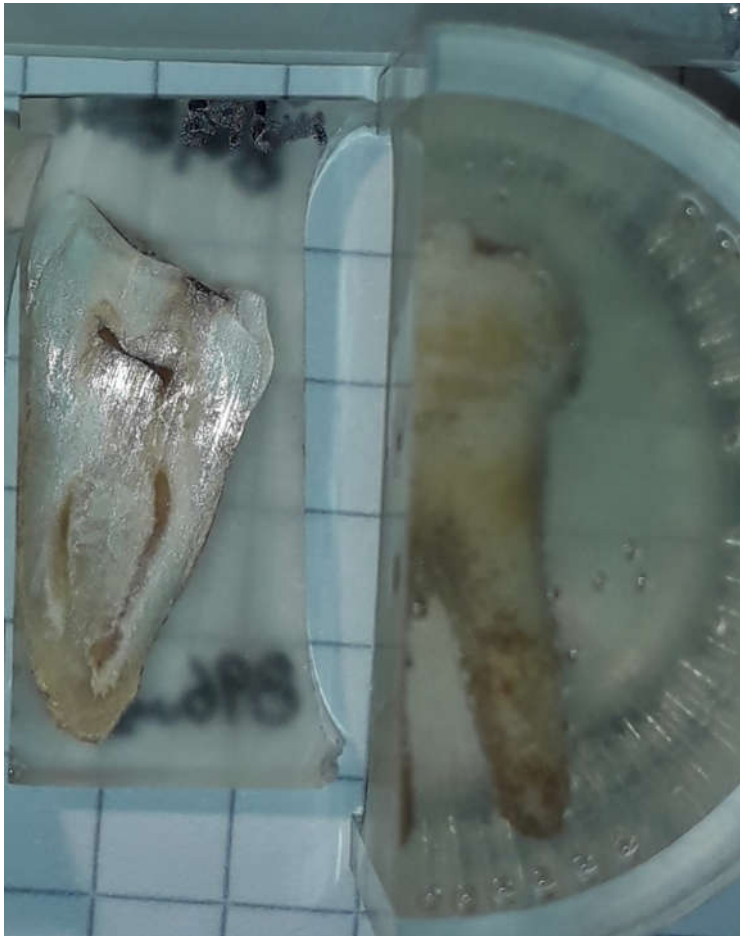

Average tooth section  
thickness ( $\mu\text{m}$ ): 99.4

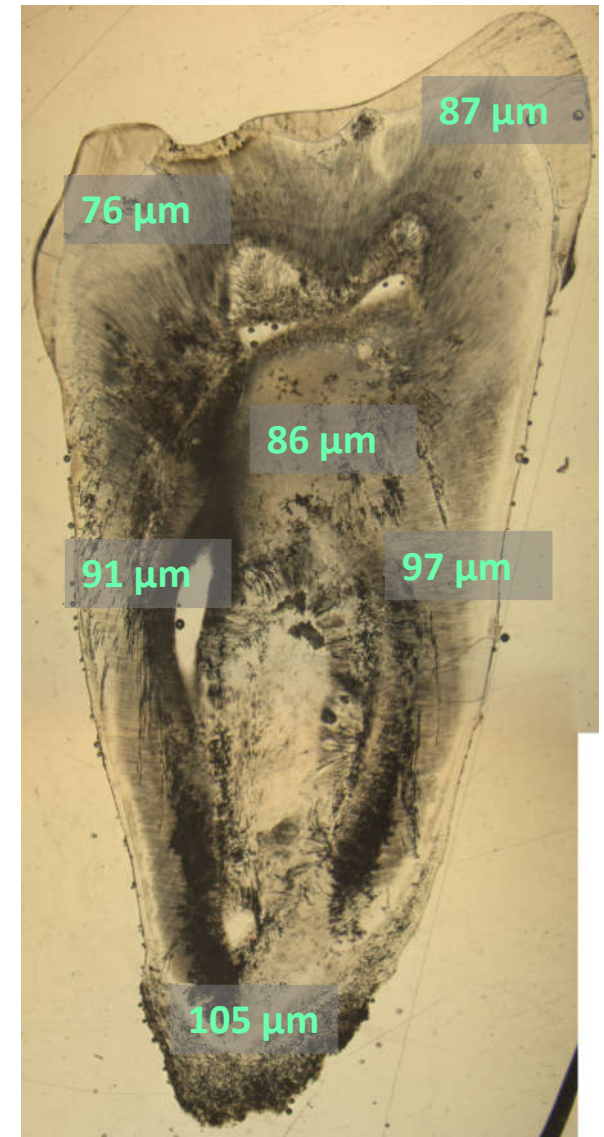

Odense 896 LLM1

Scanning

Overview at 10  $\mu\text{m}$

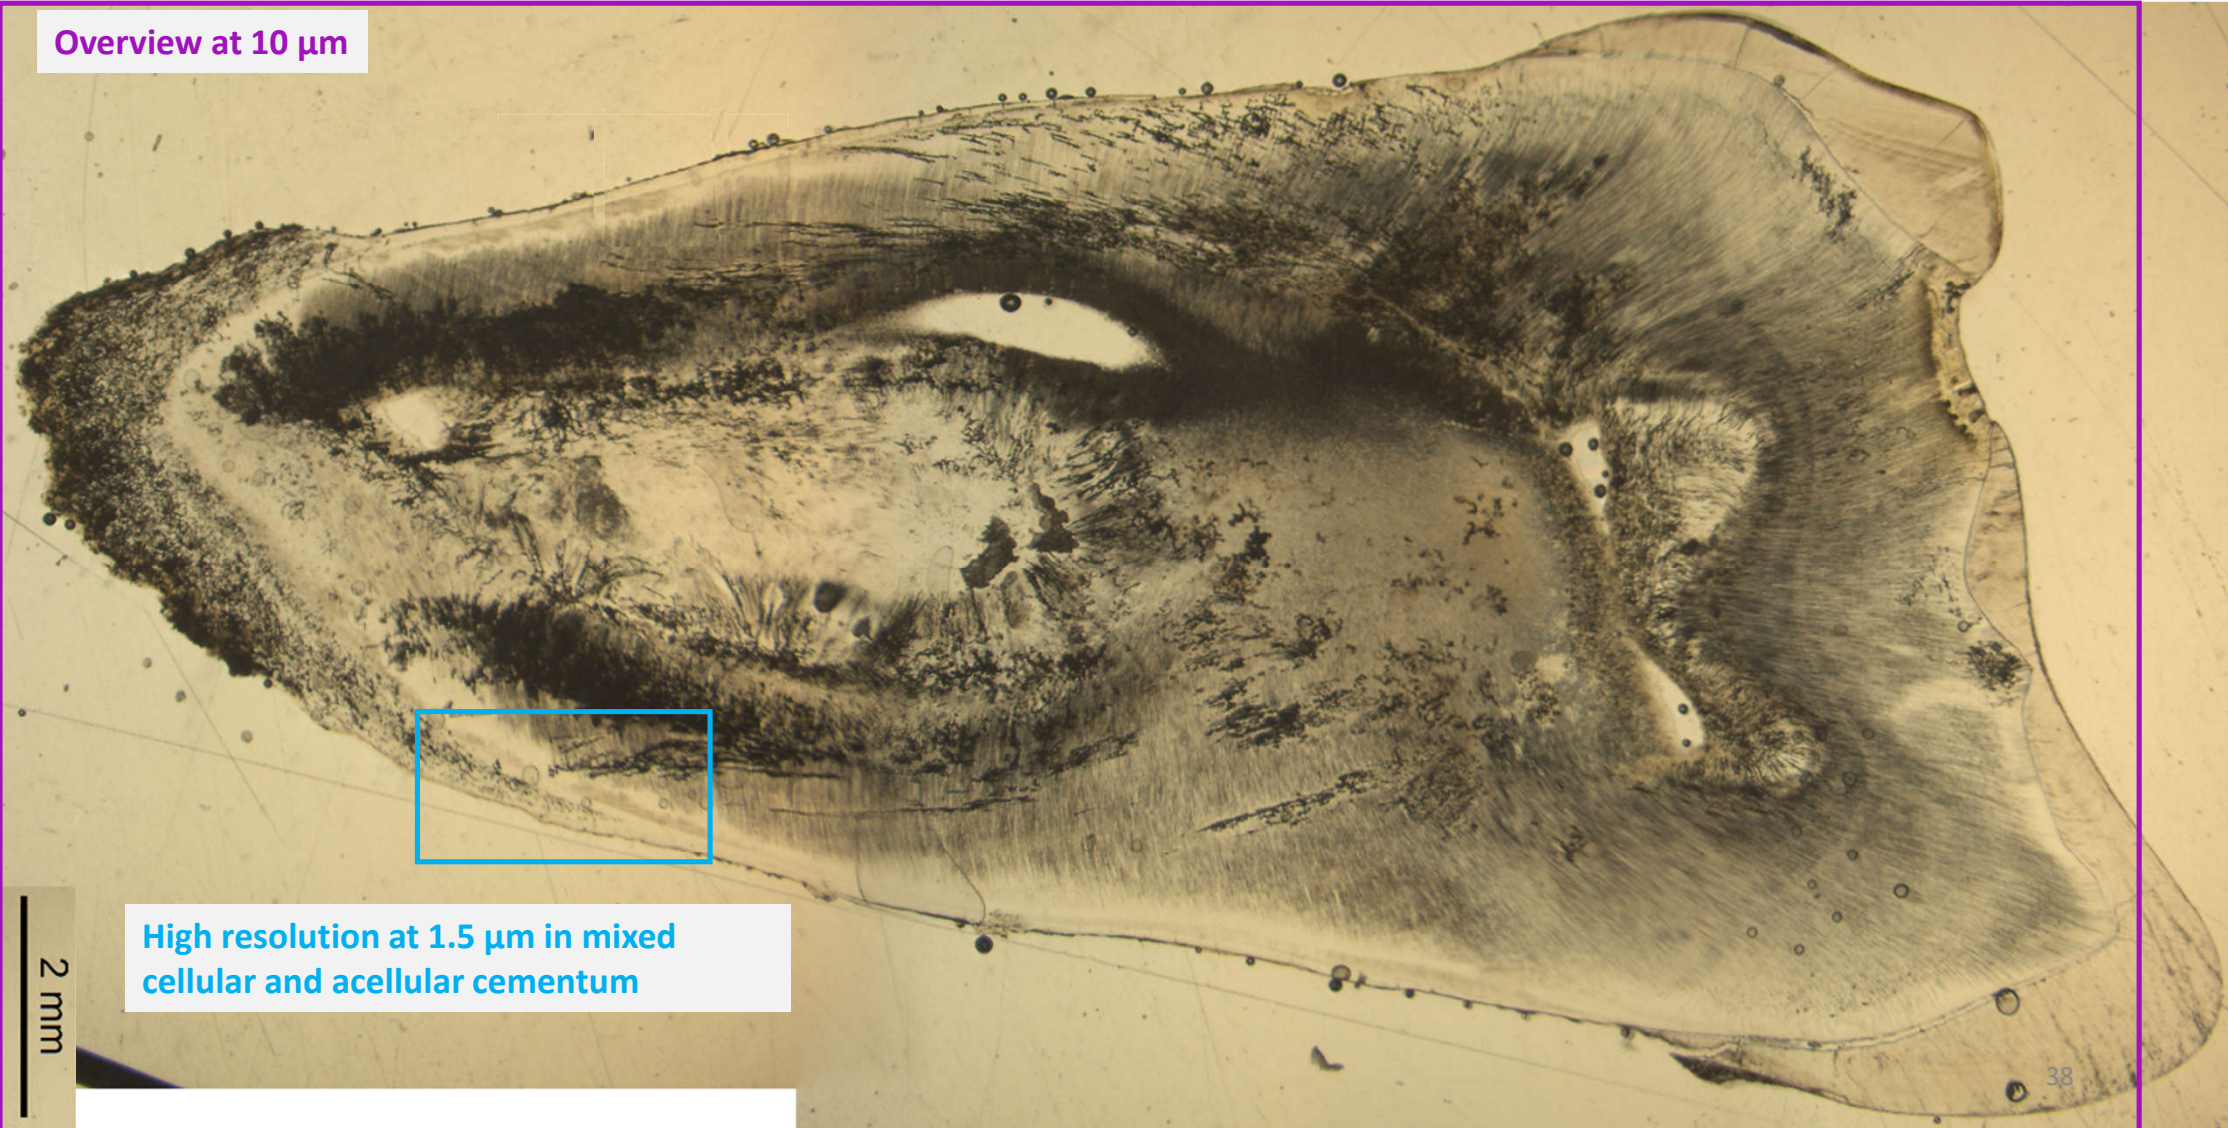



Ca K

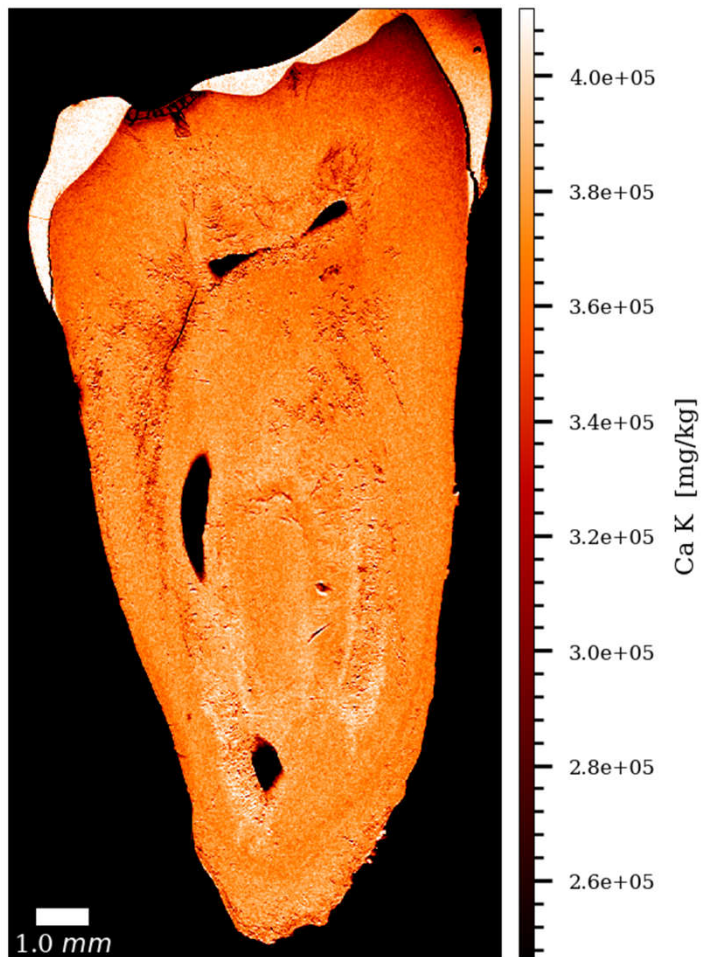

Sr K

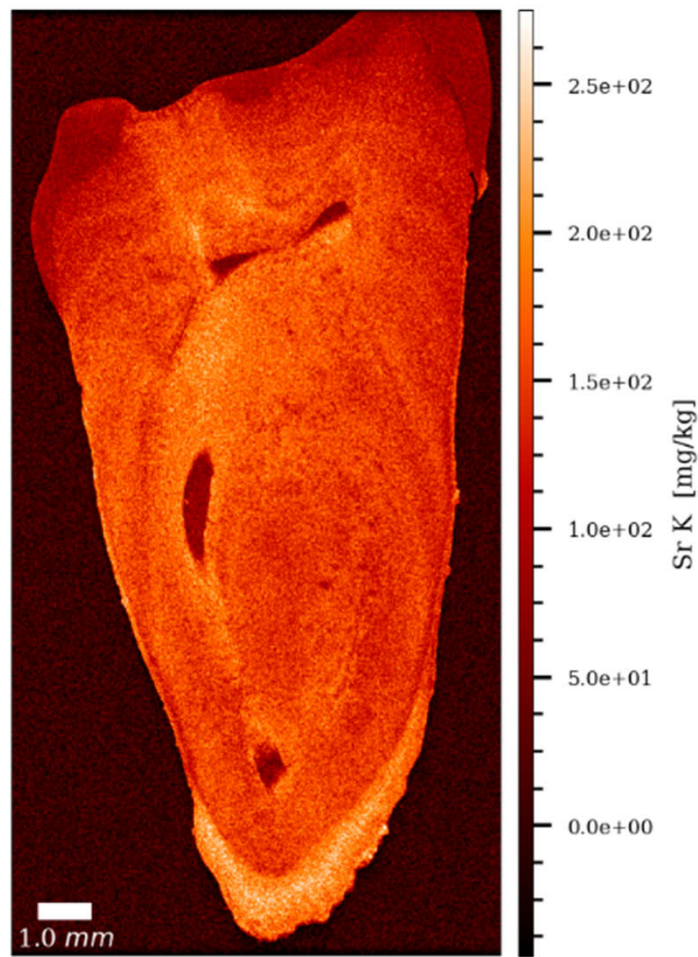

Zn K

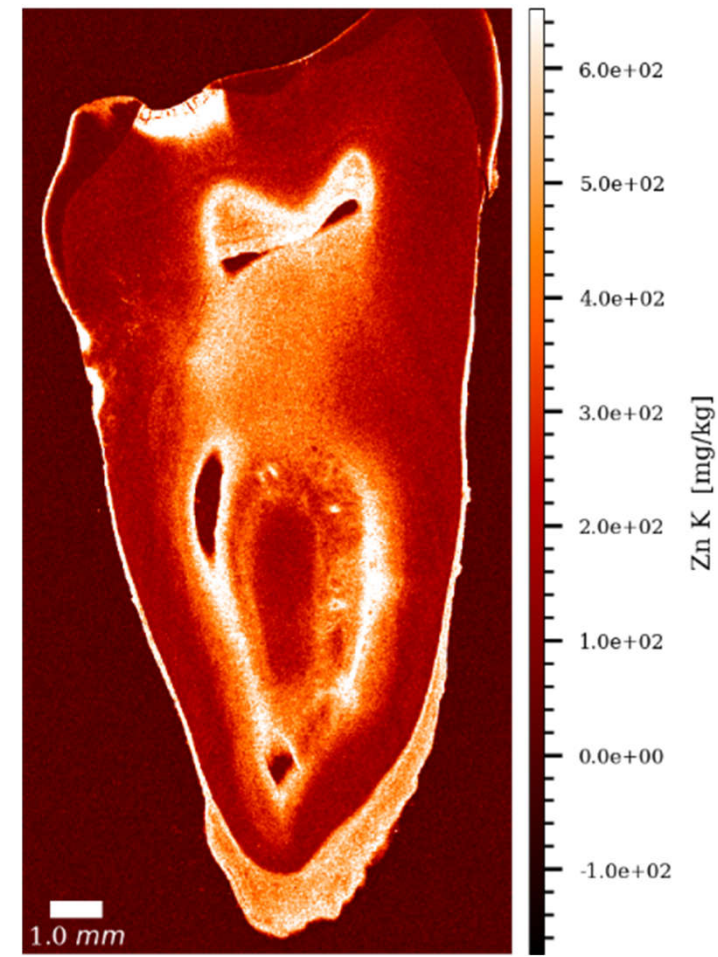

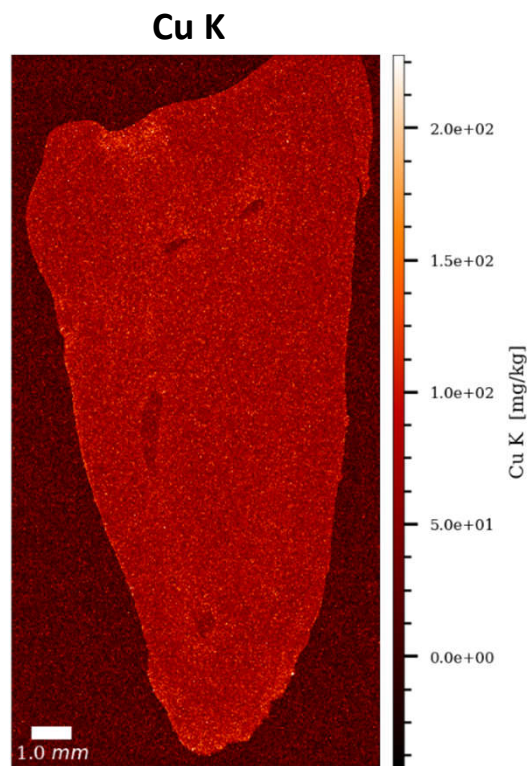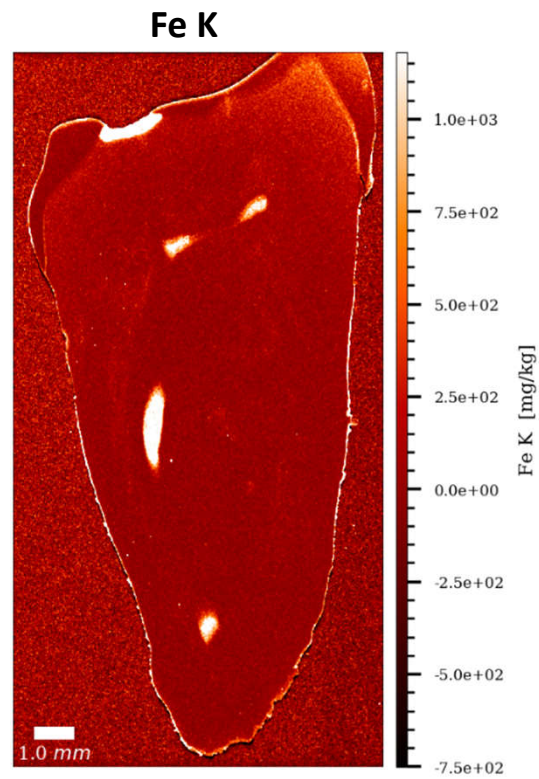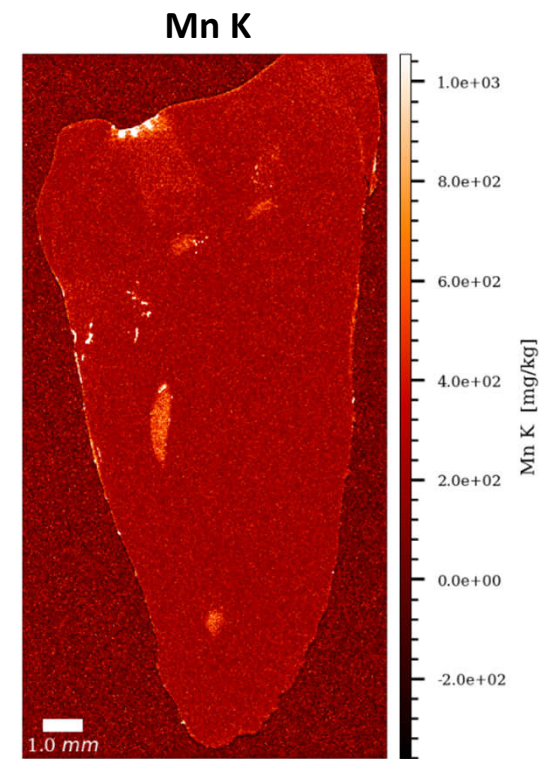



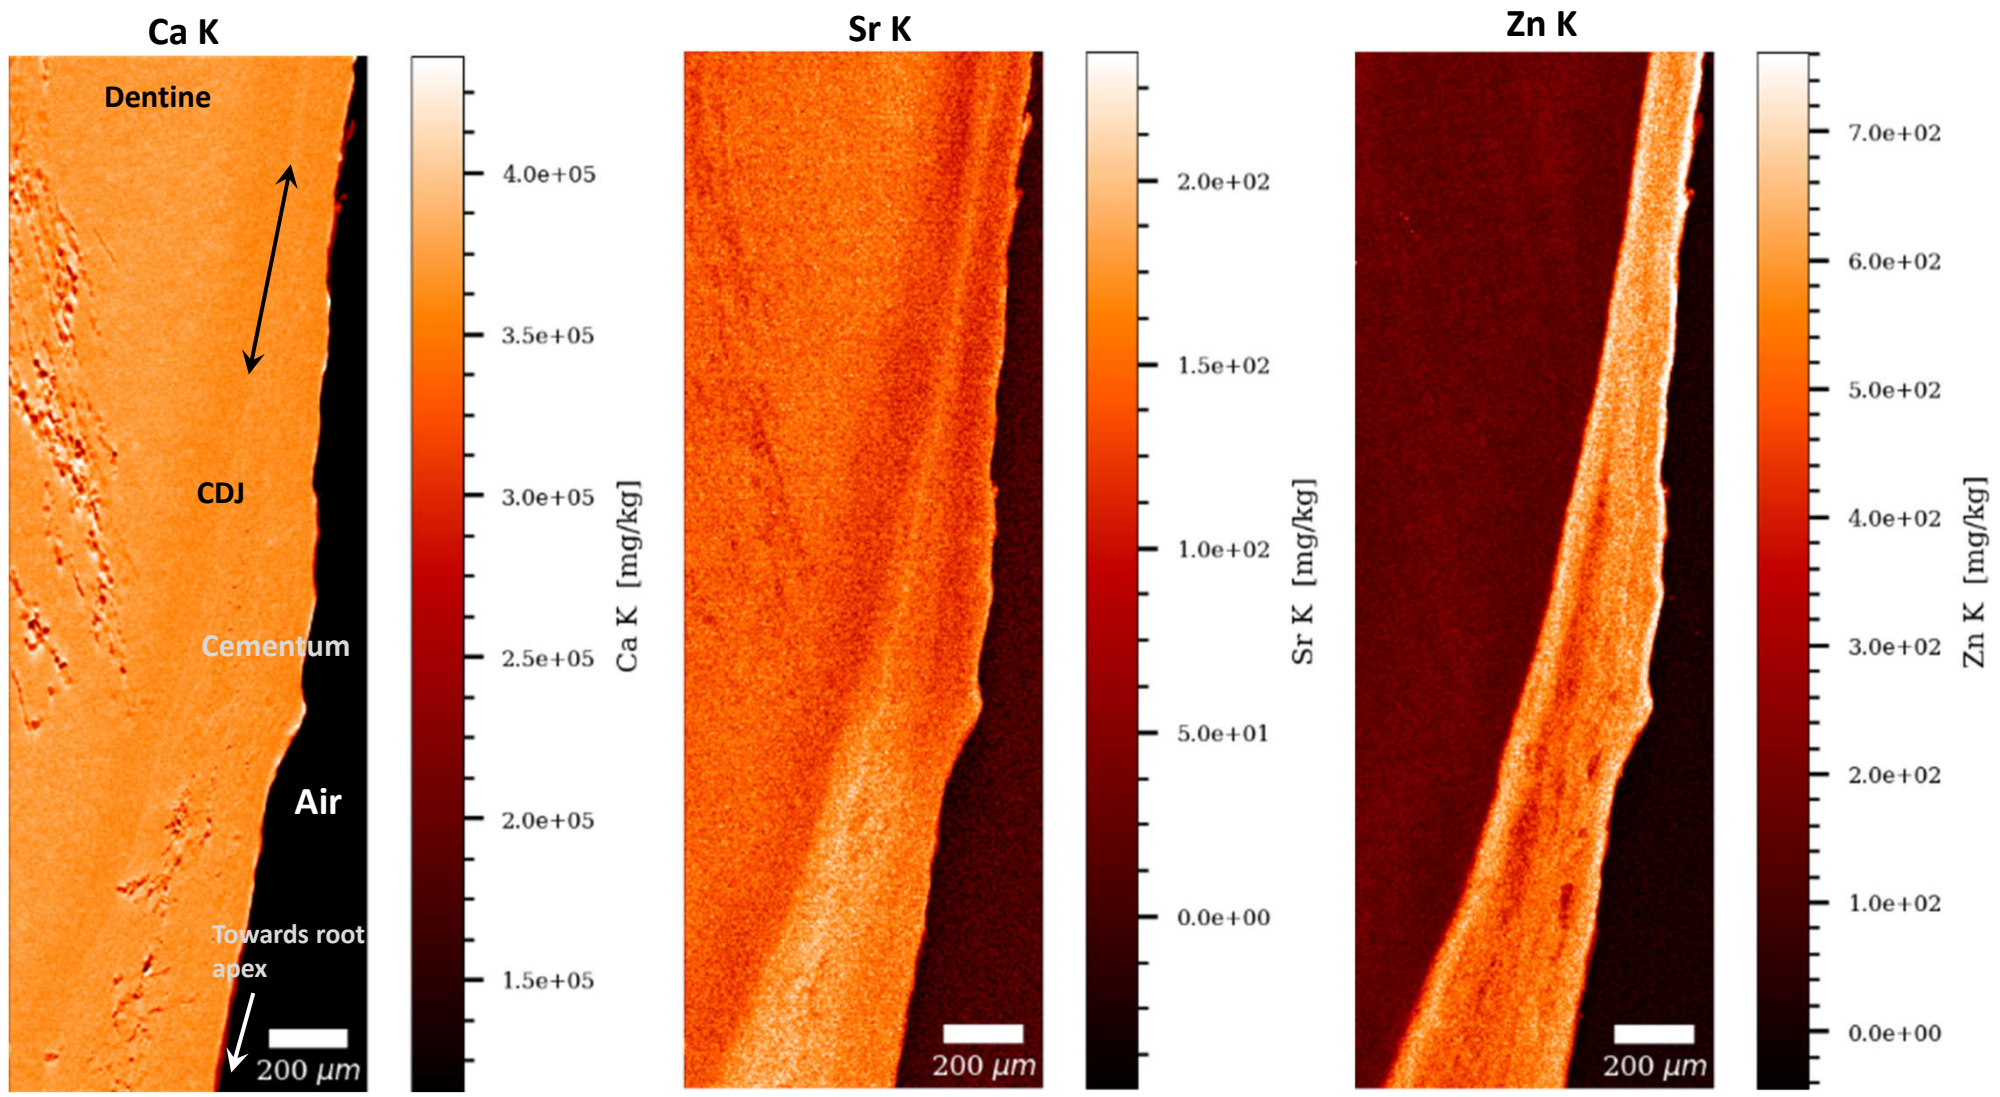

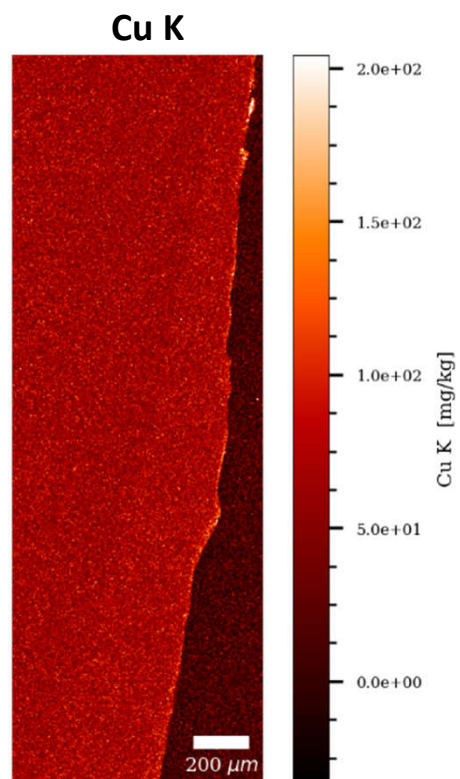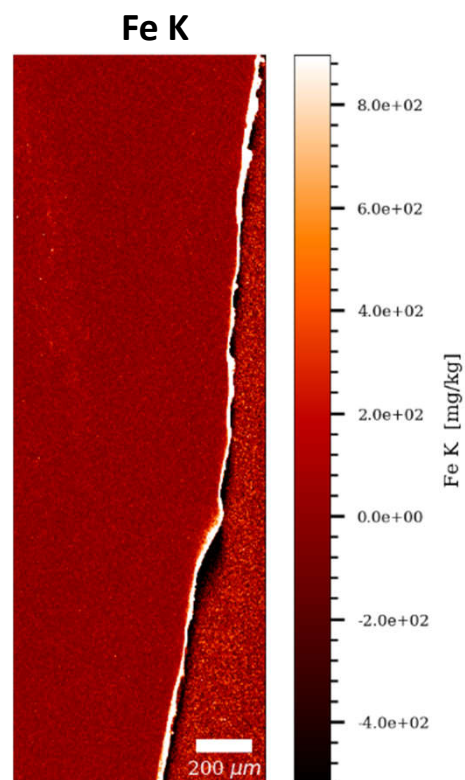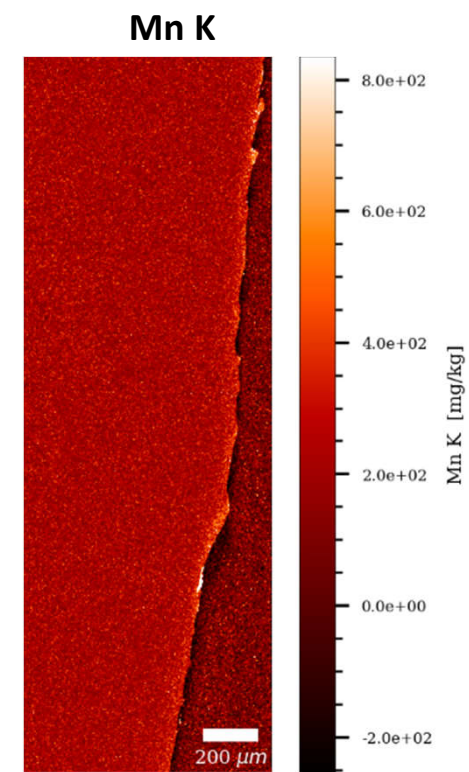



# Odense – 914 ULM1

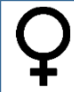

25-35 yrs. 1459 – 1566 cal. CE

Average tooth section thickness  
( $\mu\text{m}$ ): 95.9

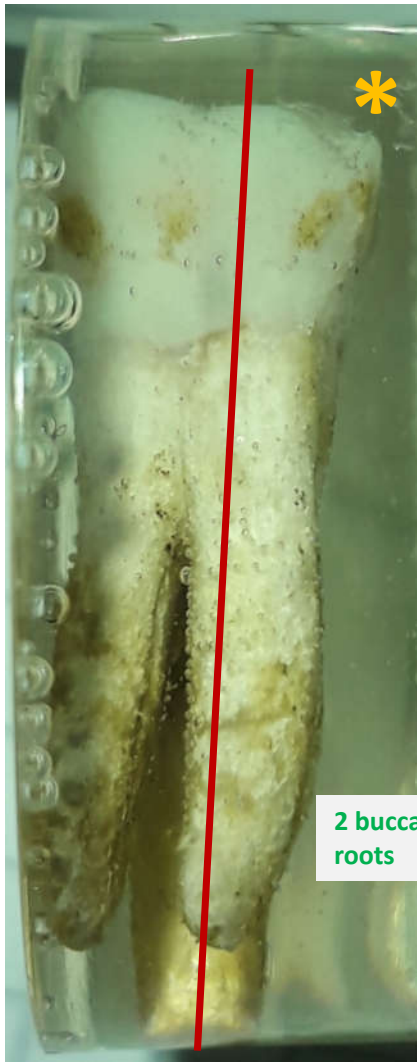

2 buccal roots

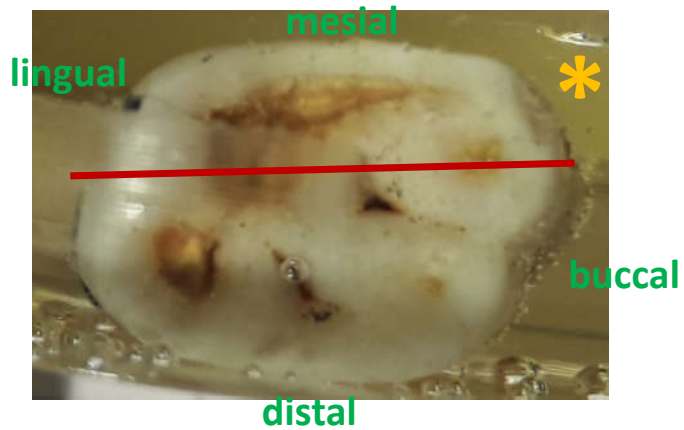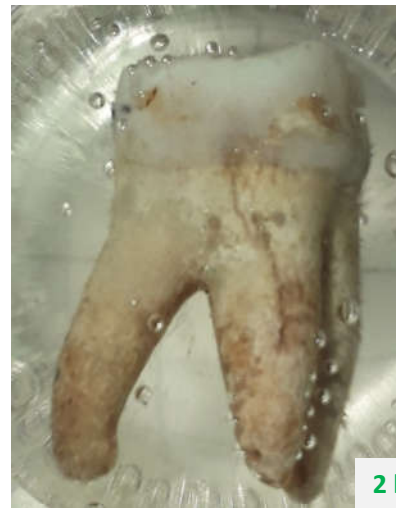

2 buccal roots

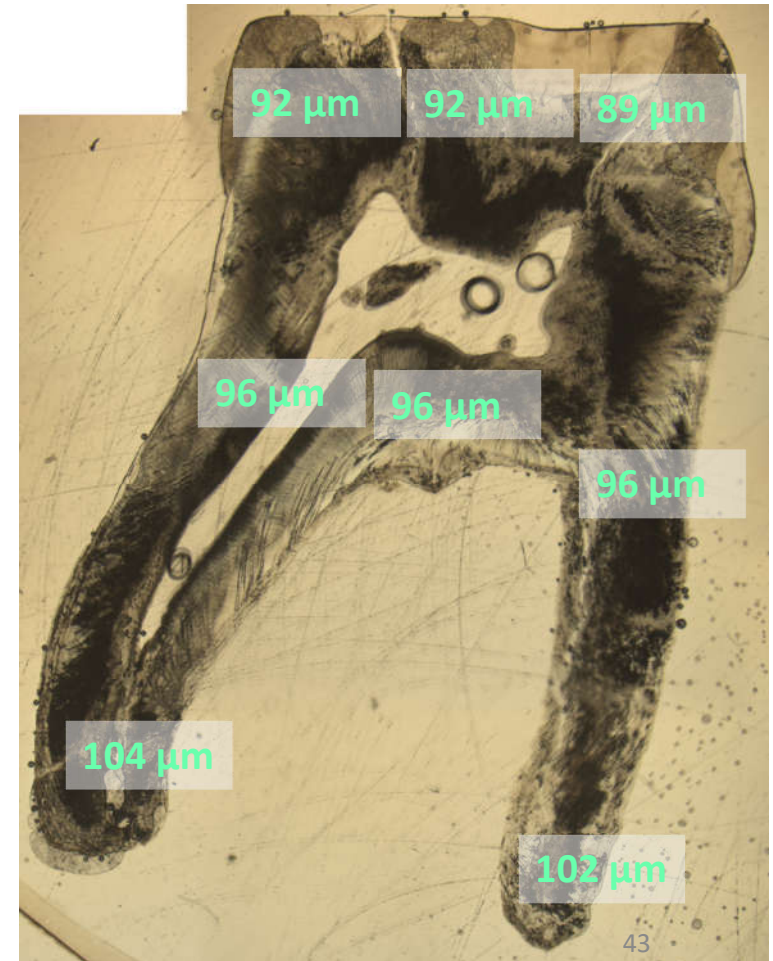

## Scanning

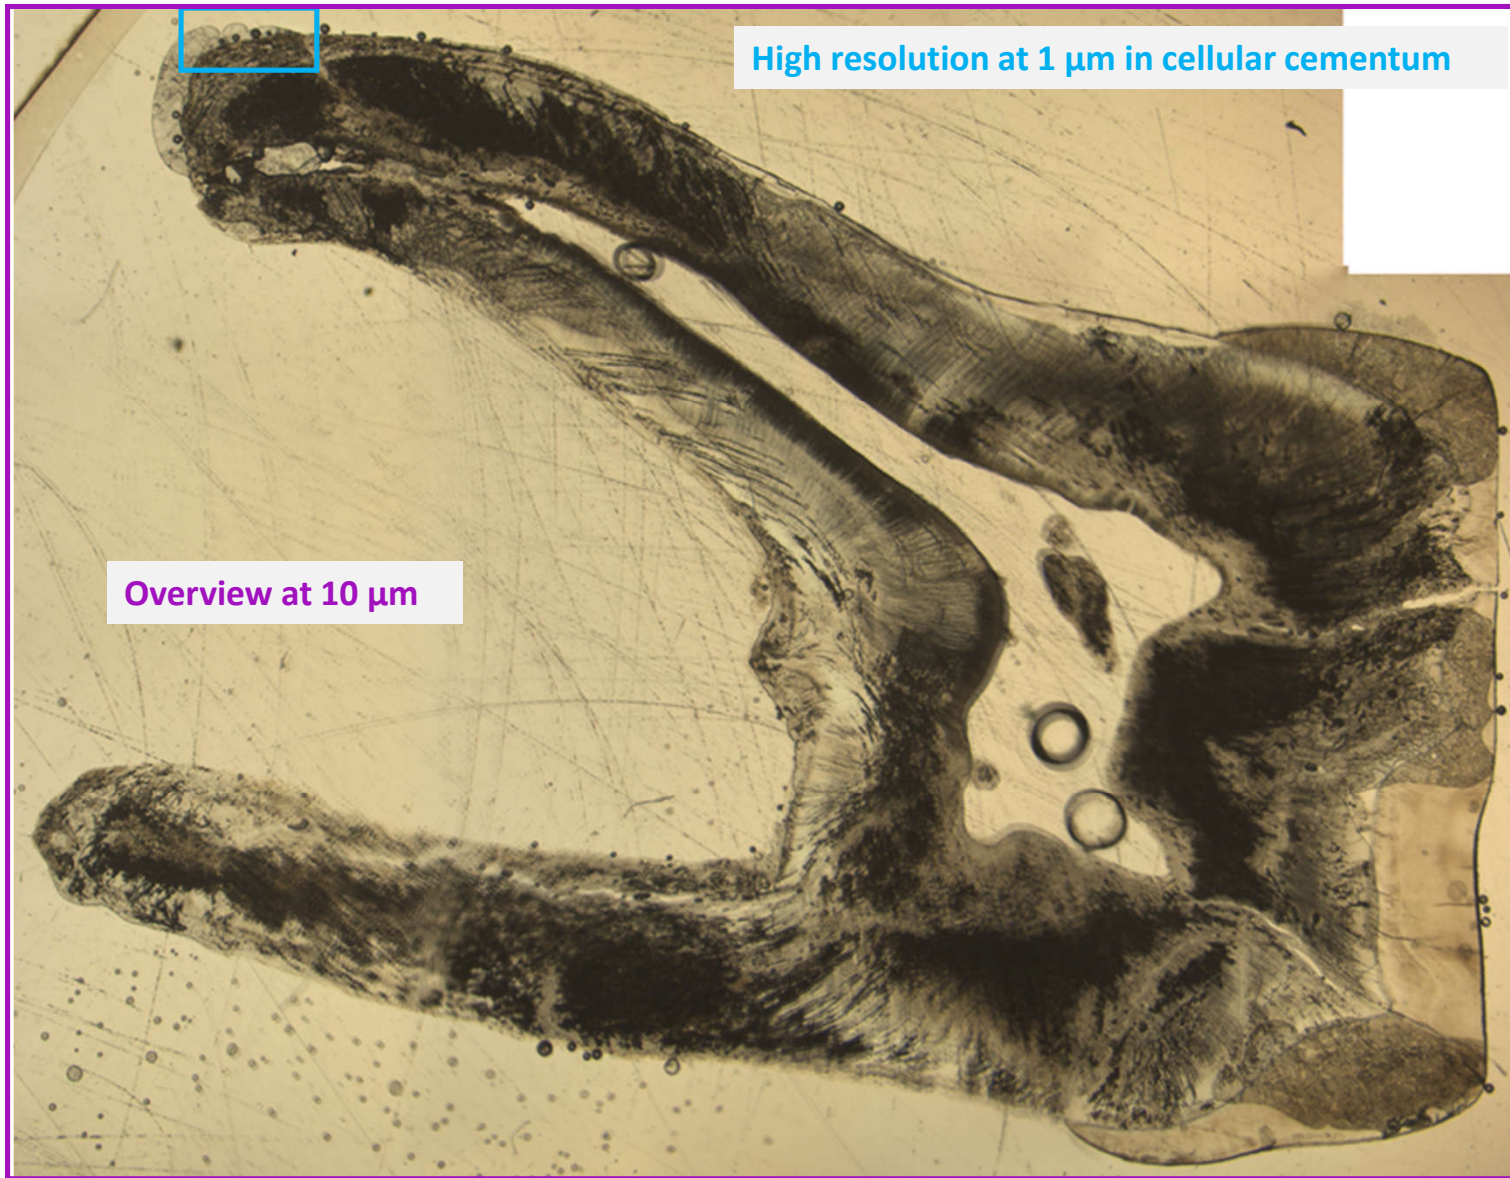



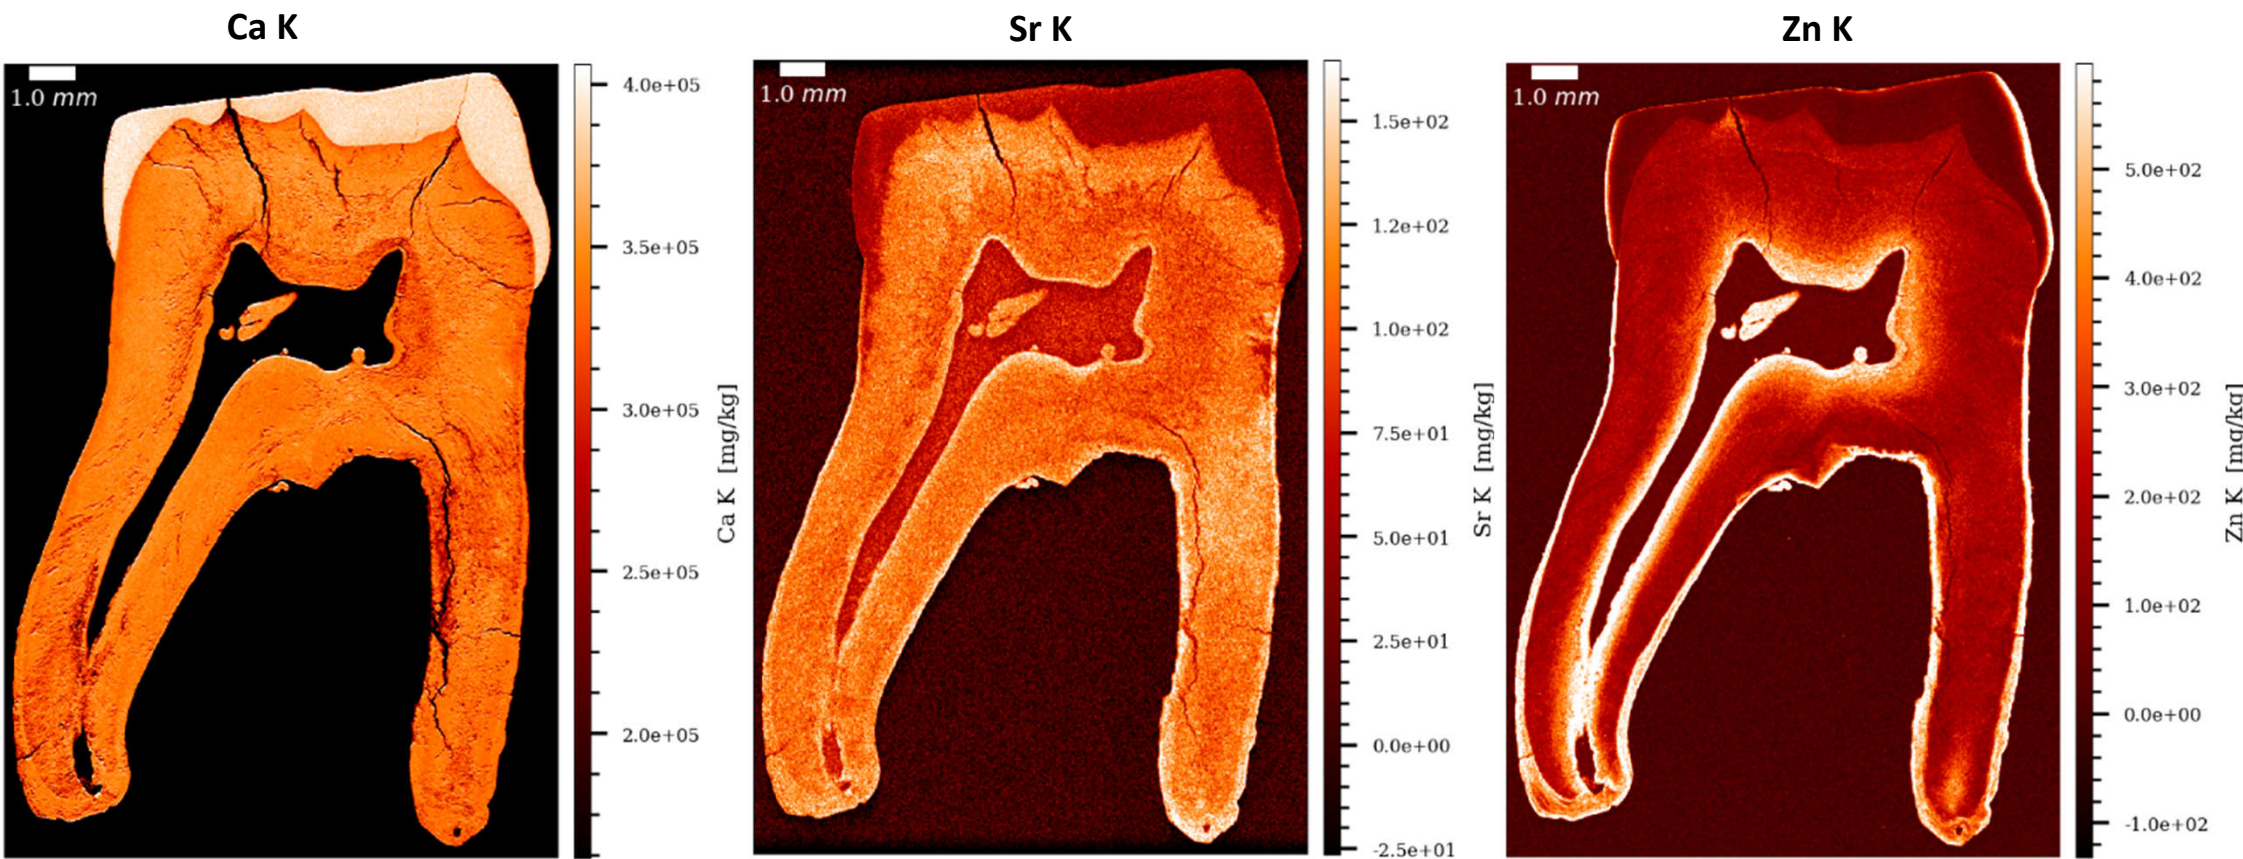

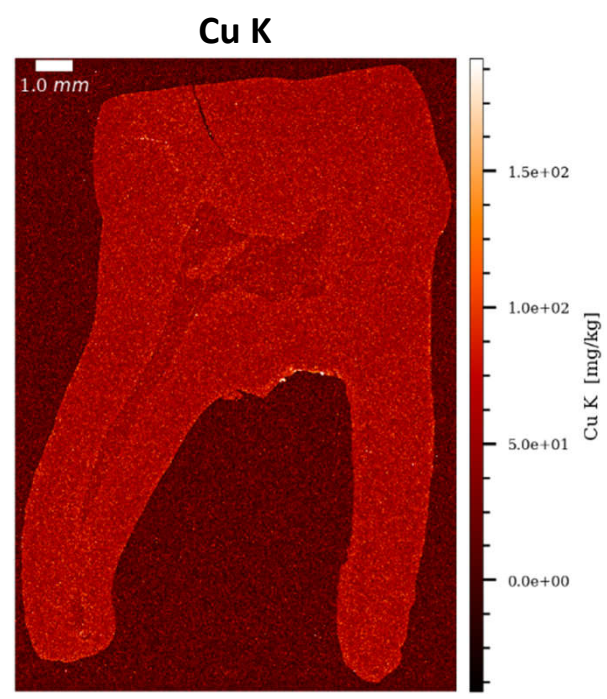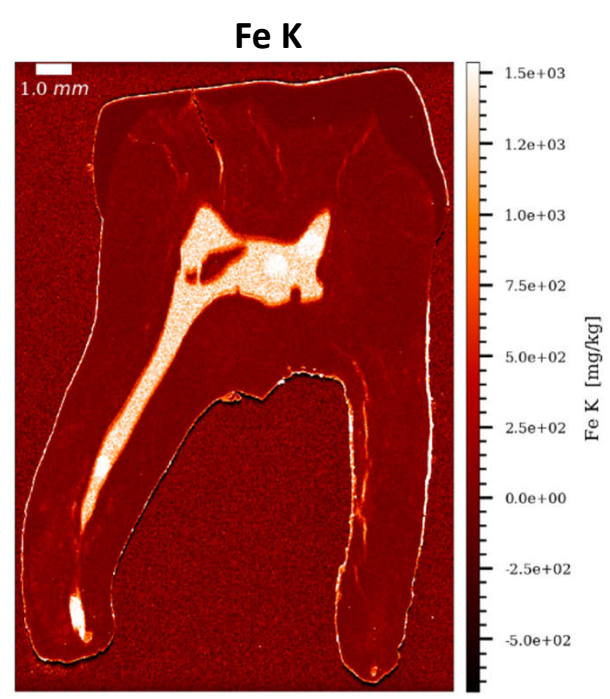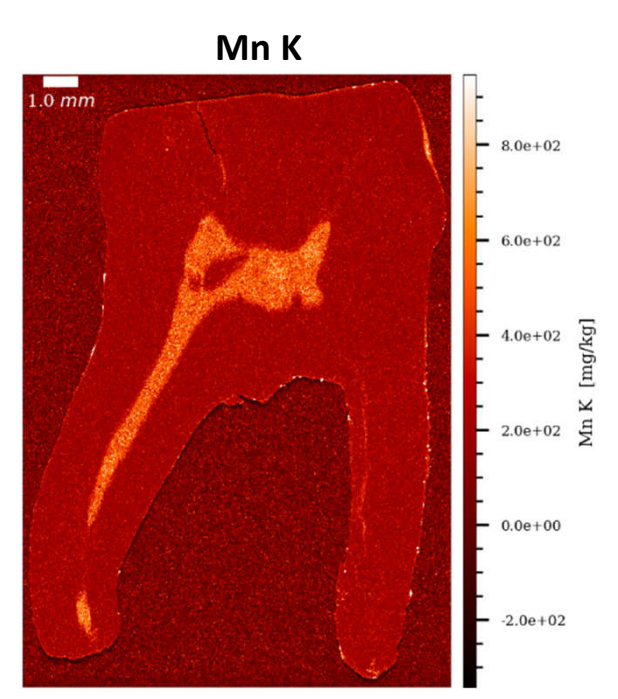



Odense 914 ULM1

Overview at 10  $\mu\text{m}$

Uncalibrated data  
(arbitrary units)

Gauss (1x1)

Br K

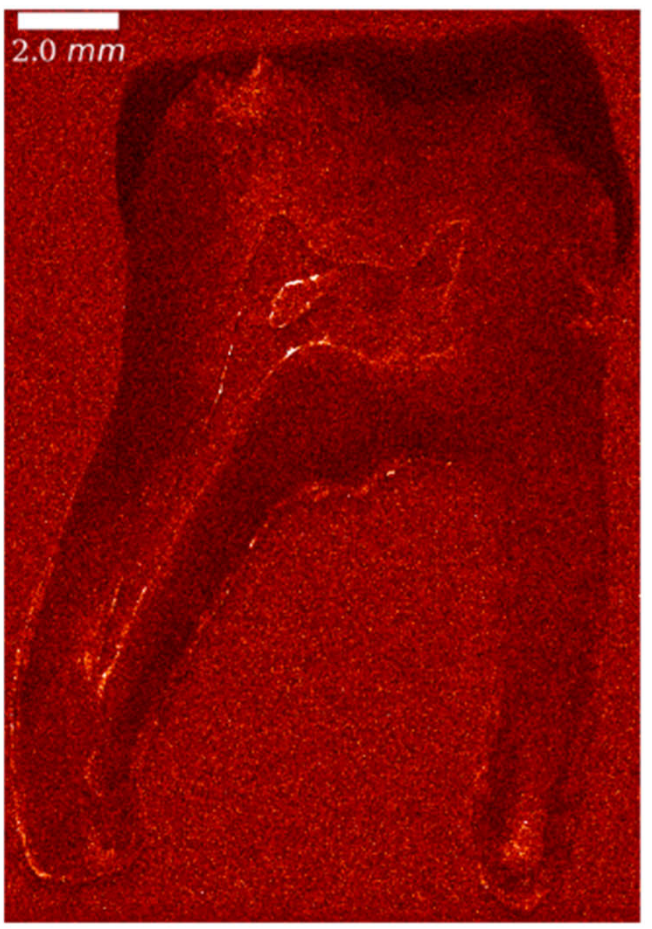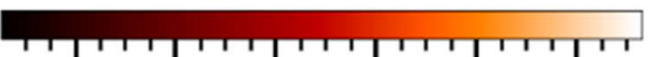

Br K [a.u.]

Pb L

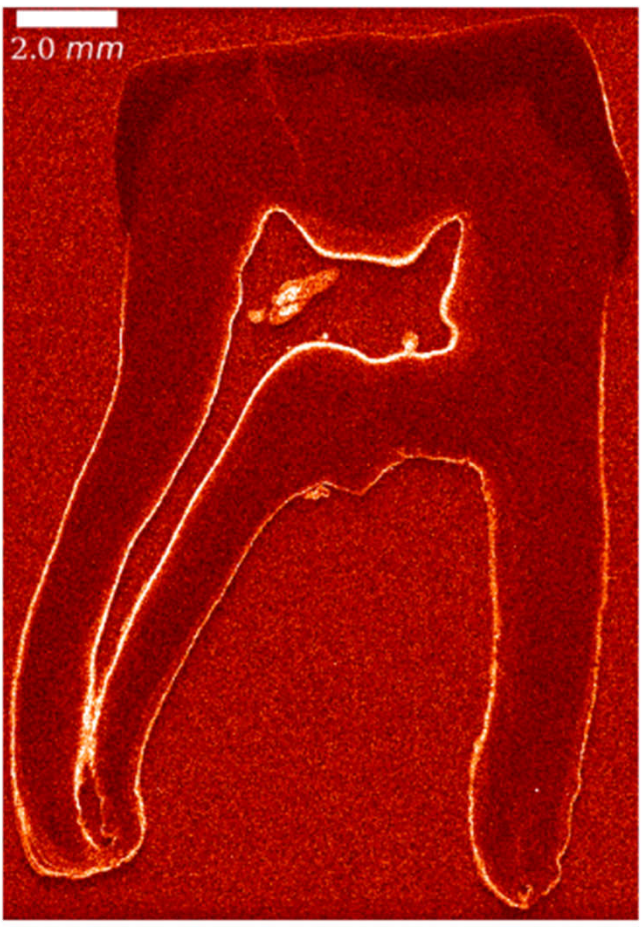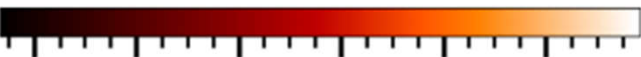

Pb L [a.u.]

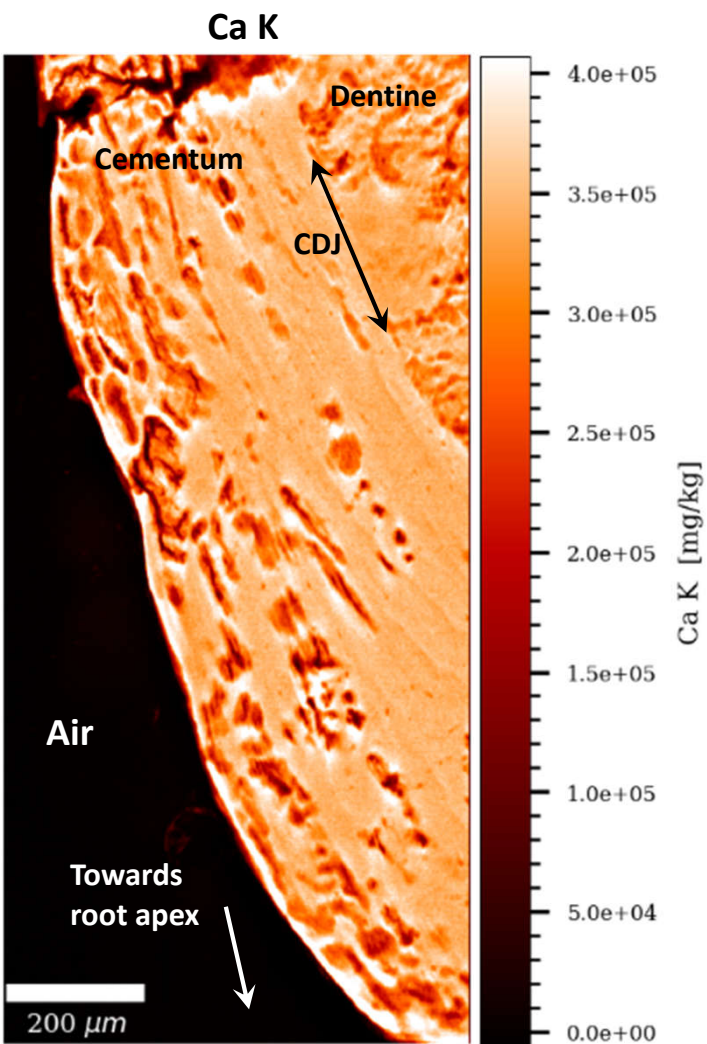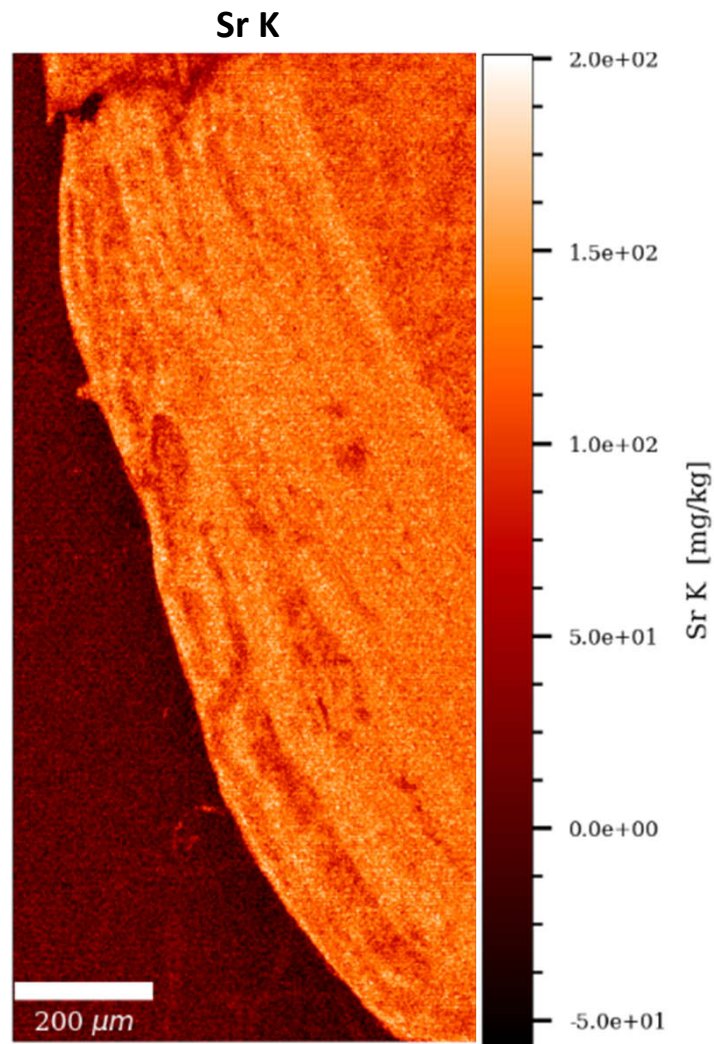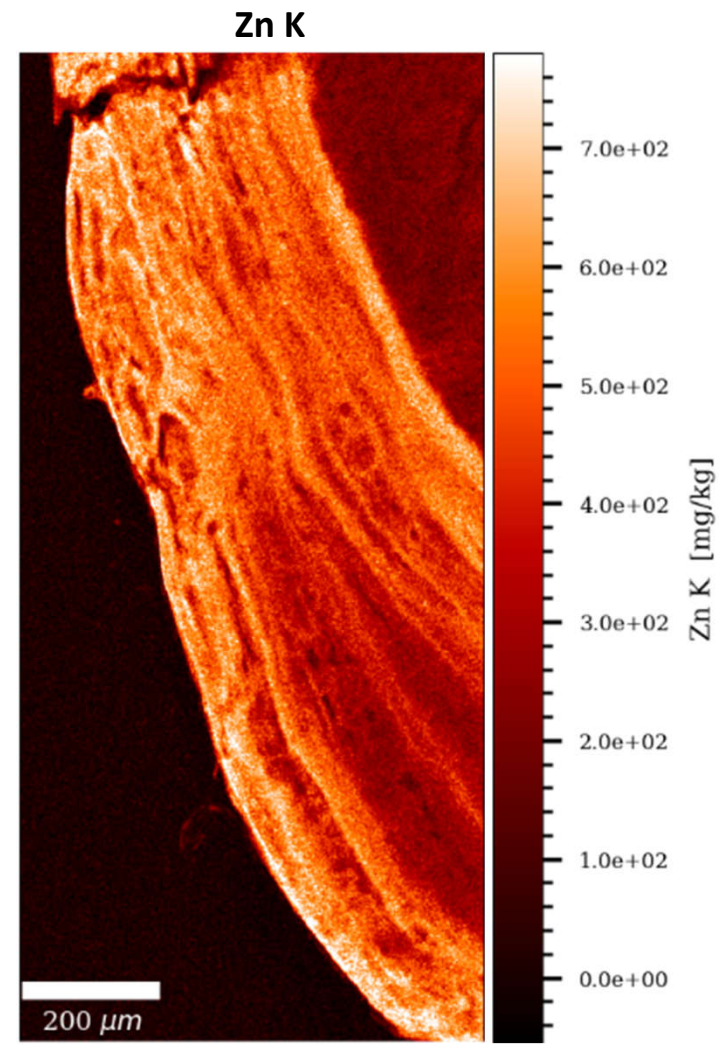



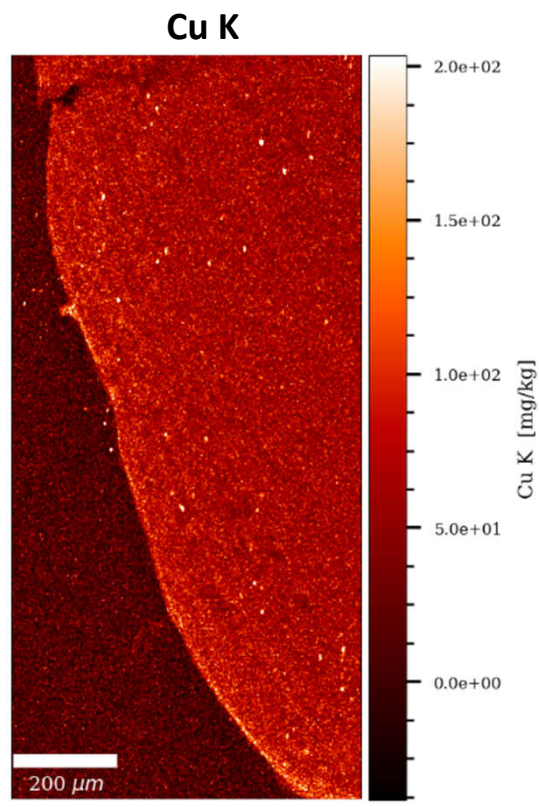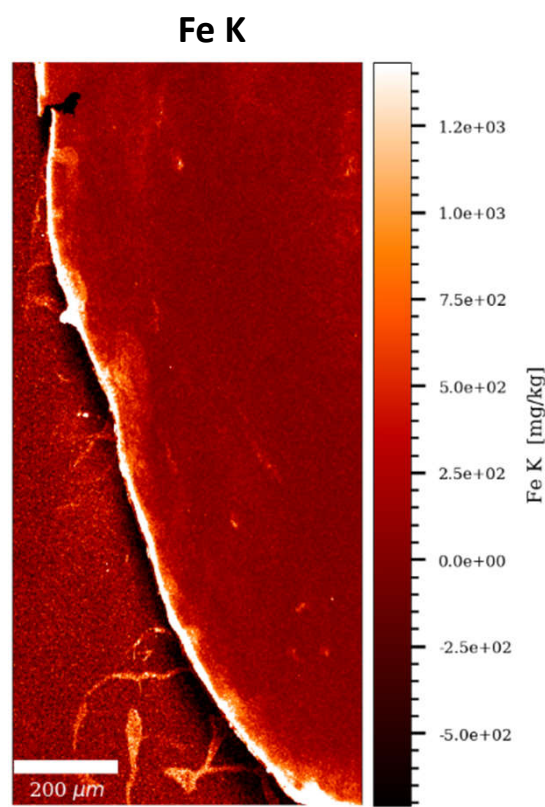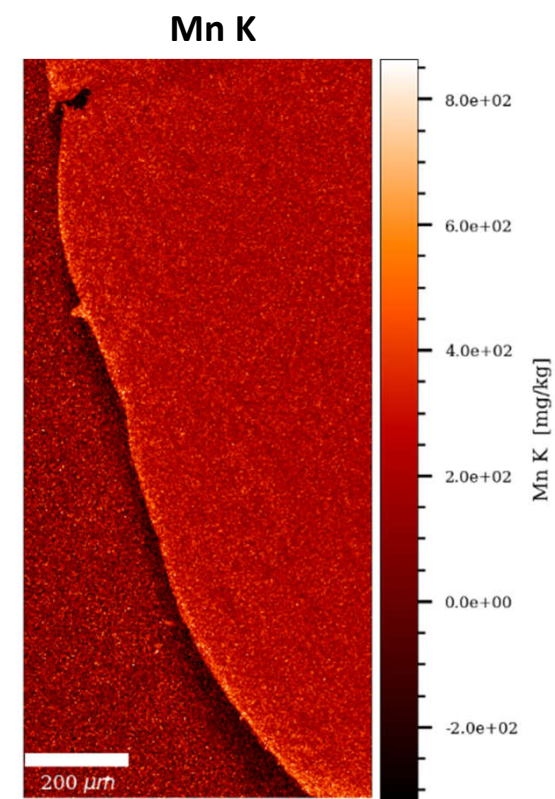

# Odense – 1149 URC

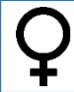

20-30 yrs. 1301 – 1415 cal. CE

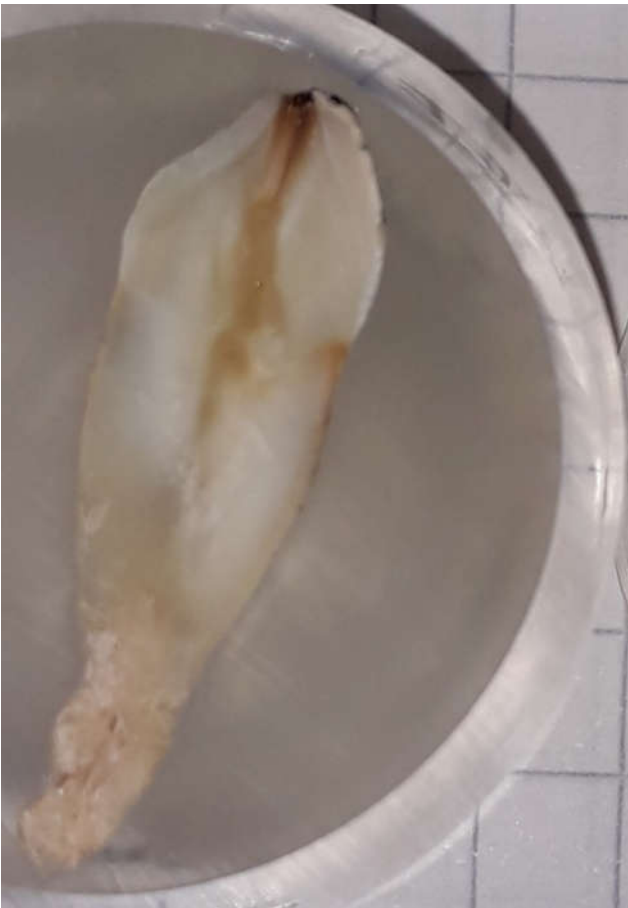

Average tooth section  
thickness ( $\mu\text{m}$ ): 98.0

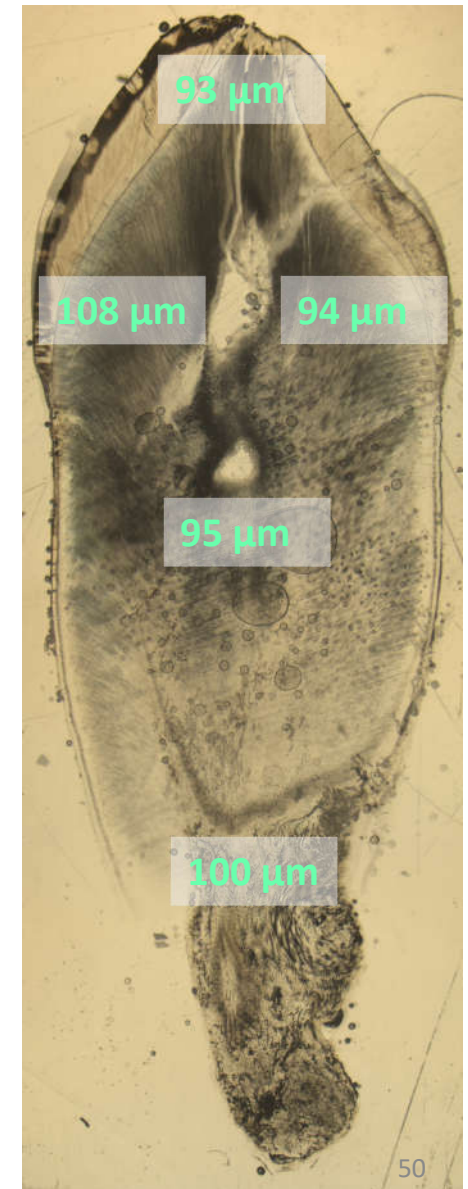



Overview at 10  $\mu\text{m}$

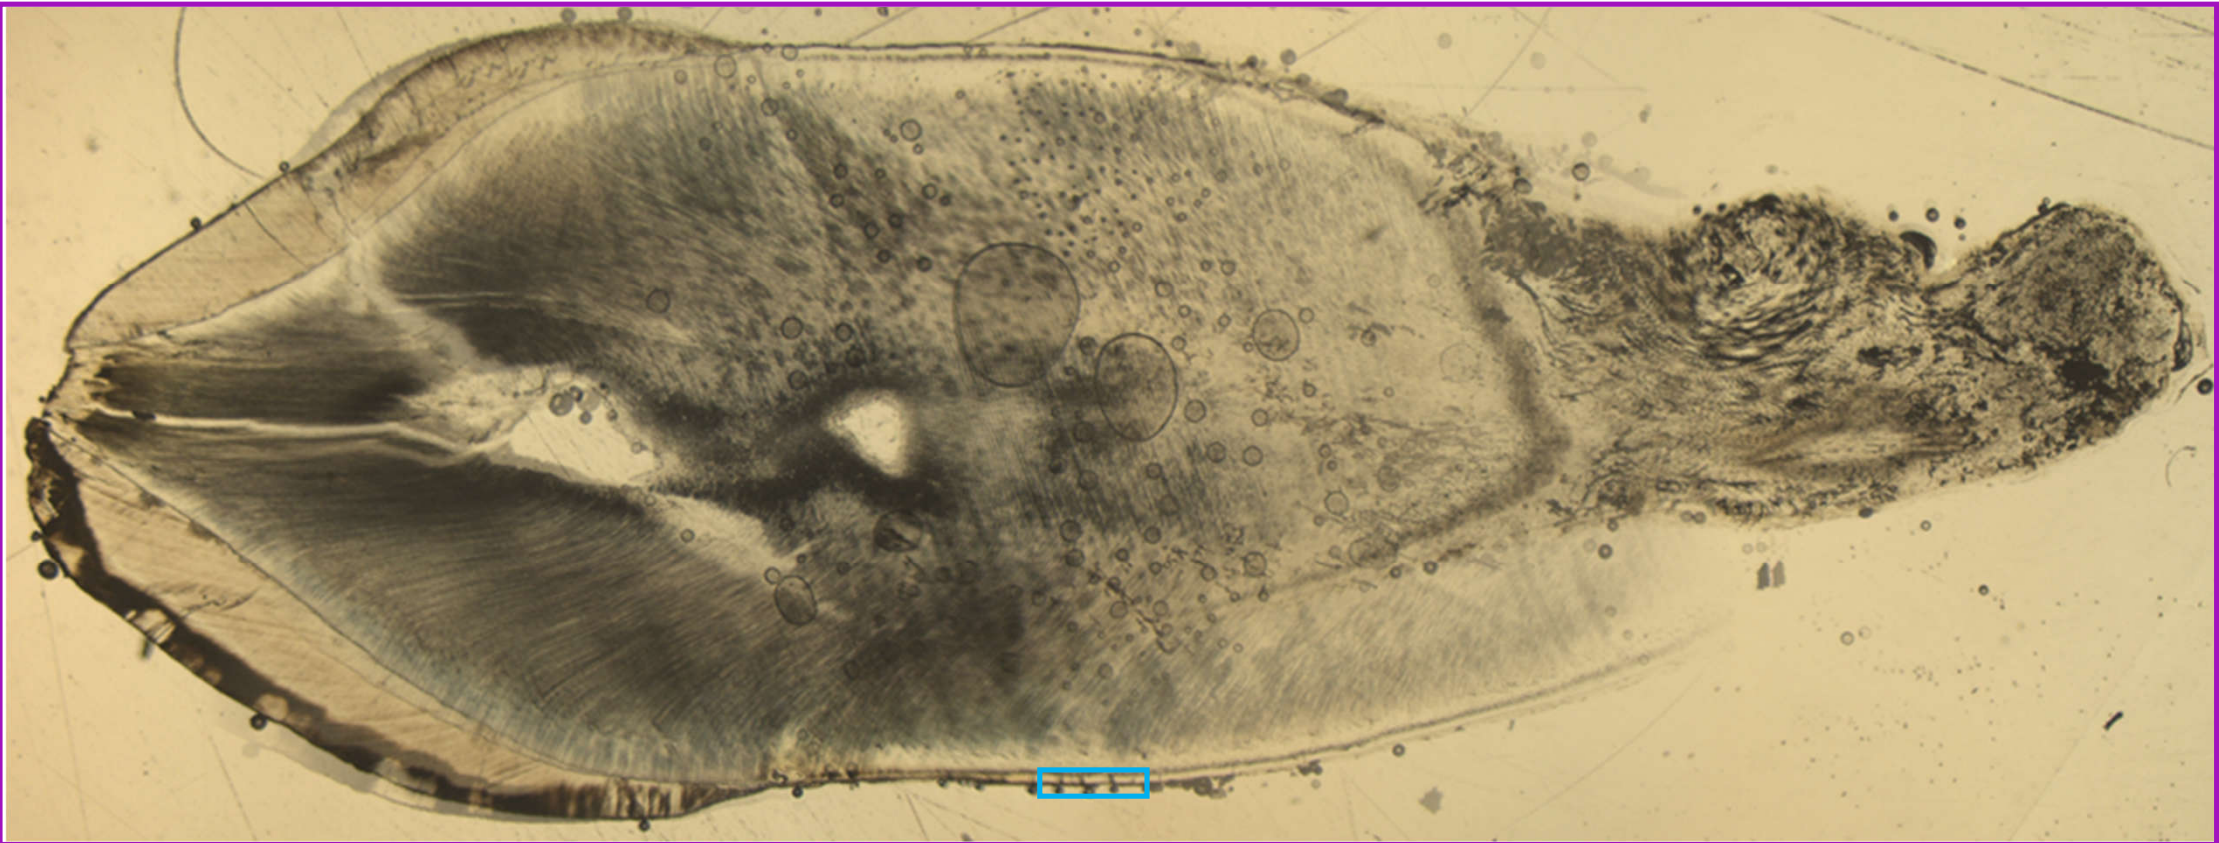

High resolution at 1  $\mu\text{m}$  in acellular cementum

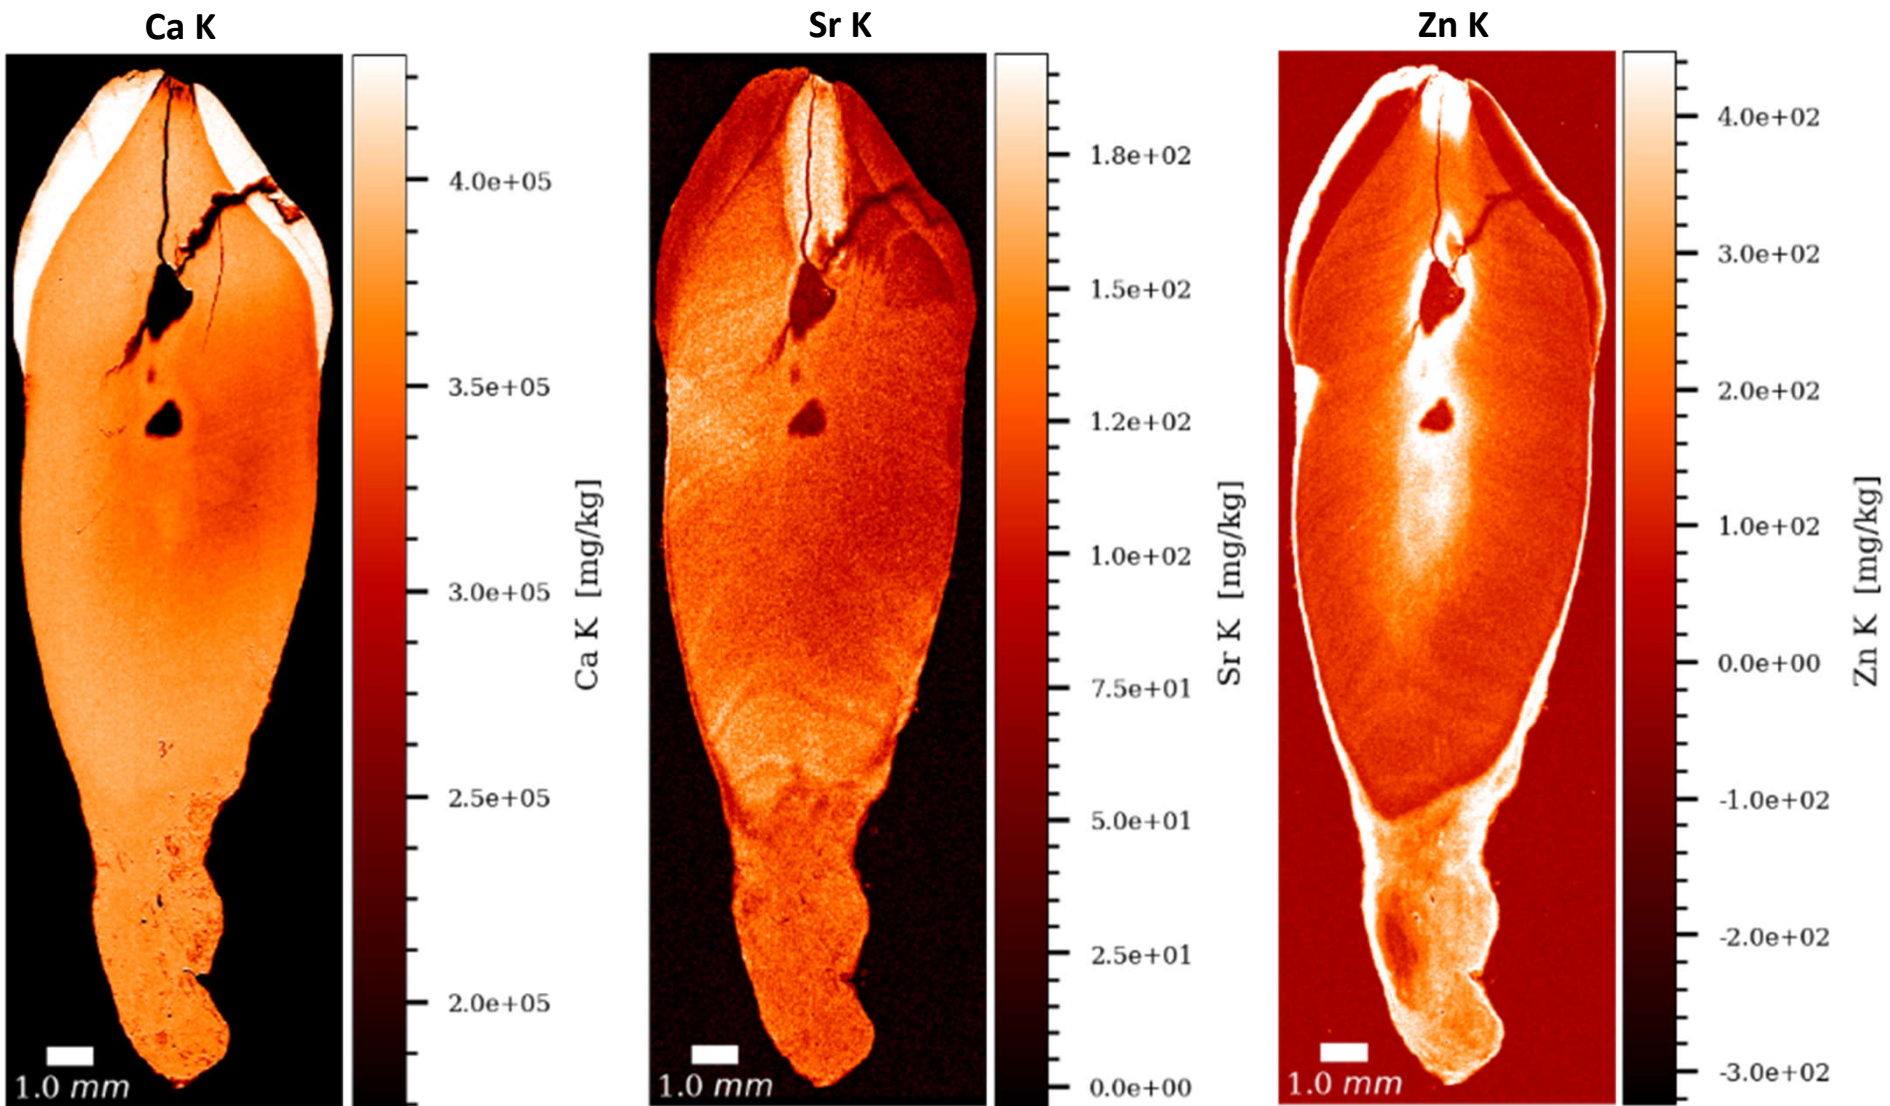



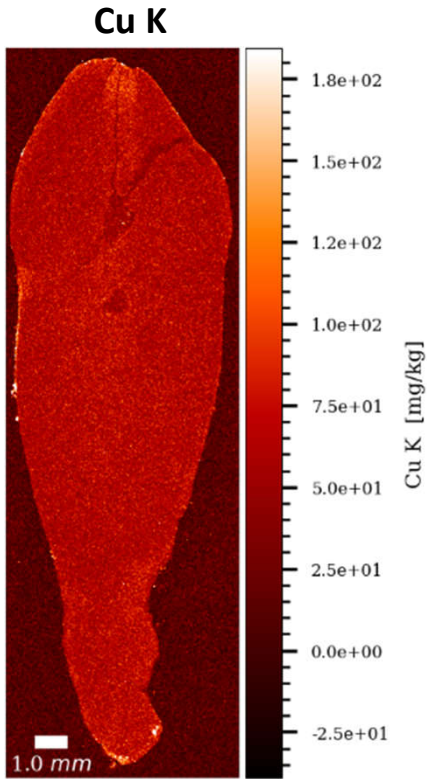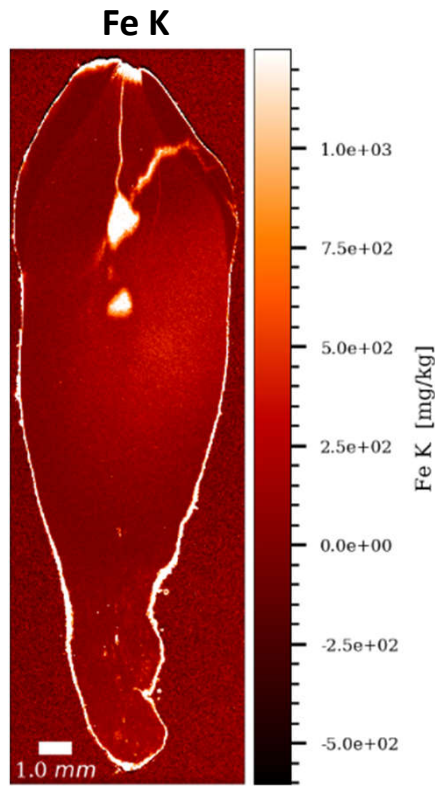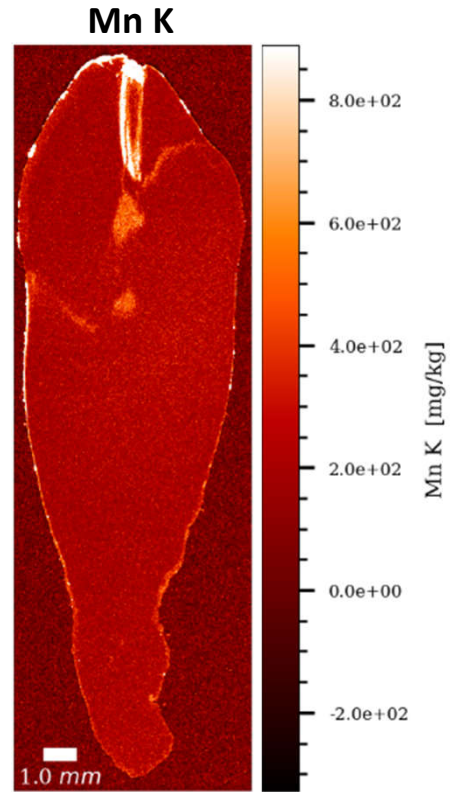

Odense 1149 URC

Overview at 10  $\mu\text{m}$

Uncalibrated data  
(arbitrary units)

Gauss (1.2x1.2)

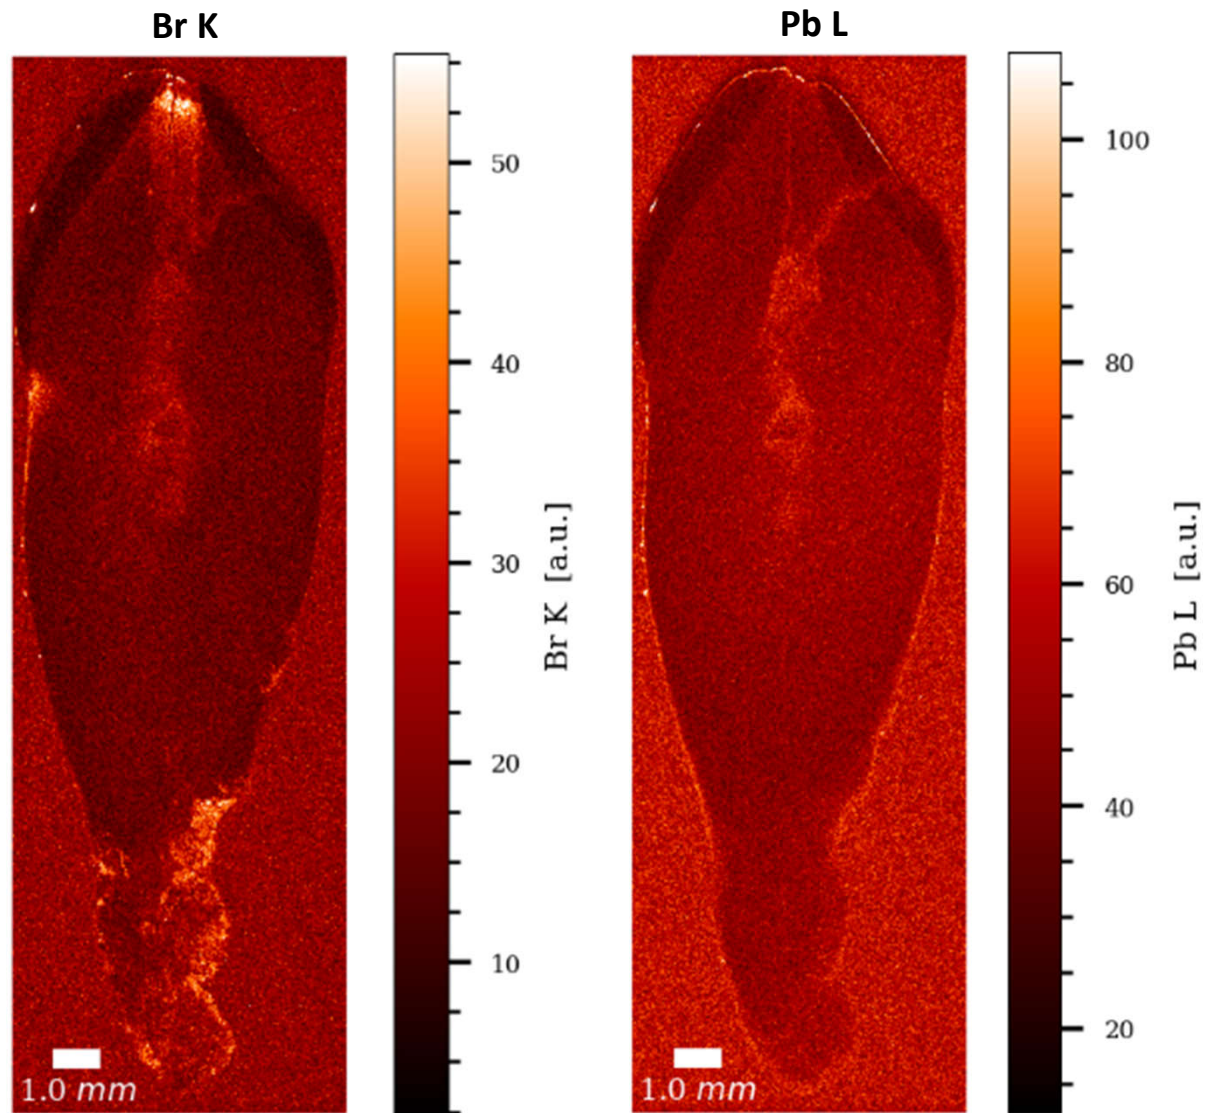



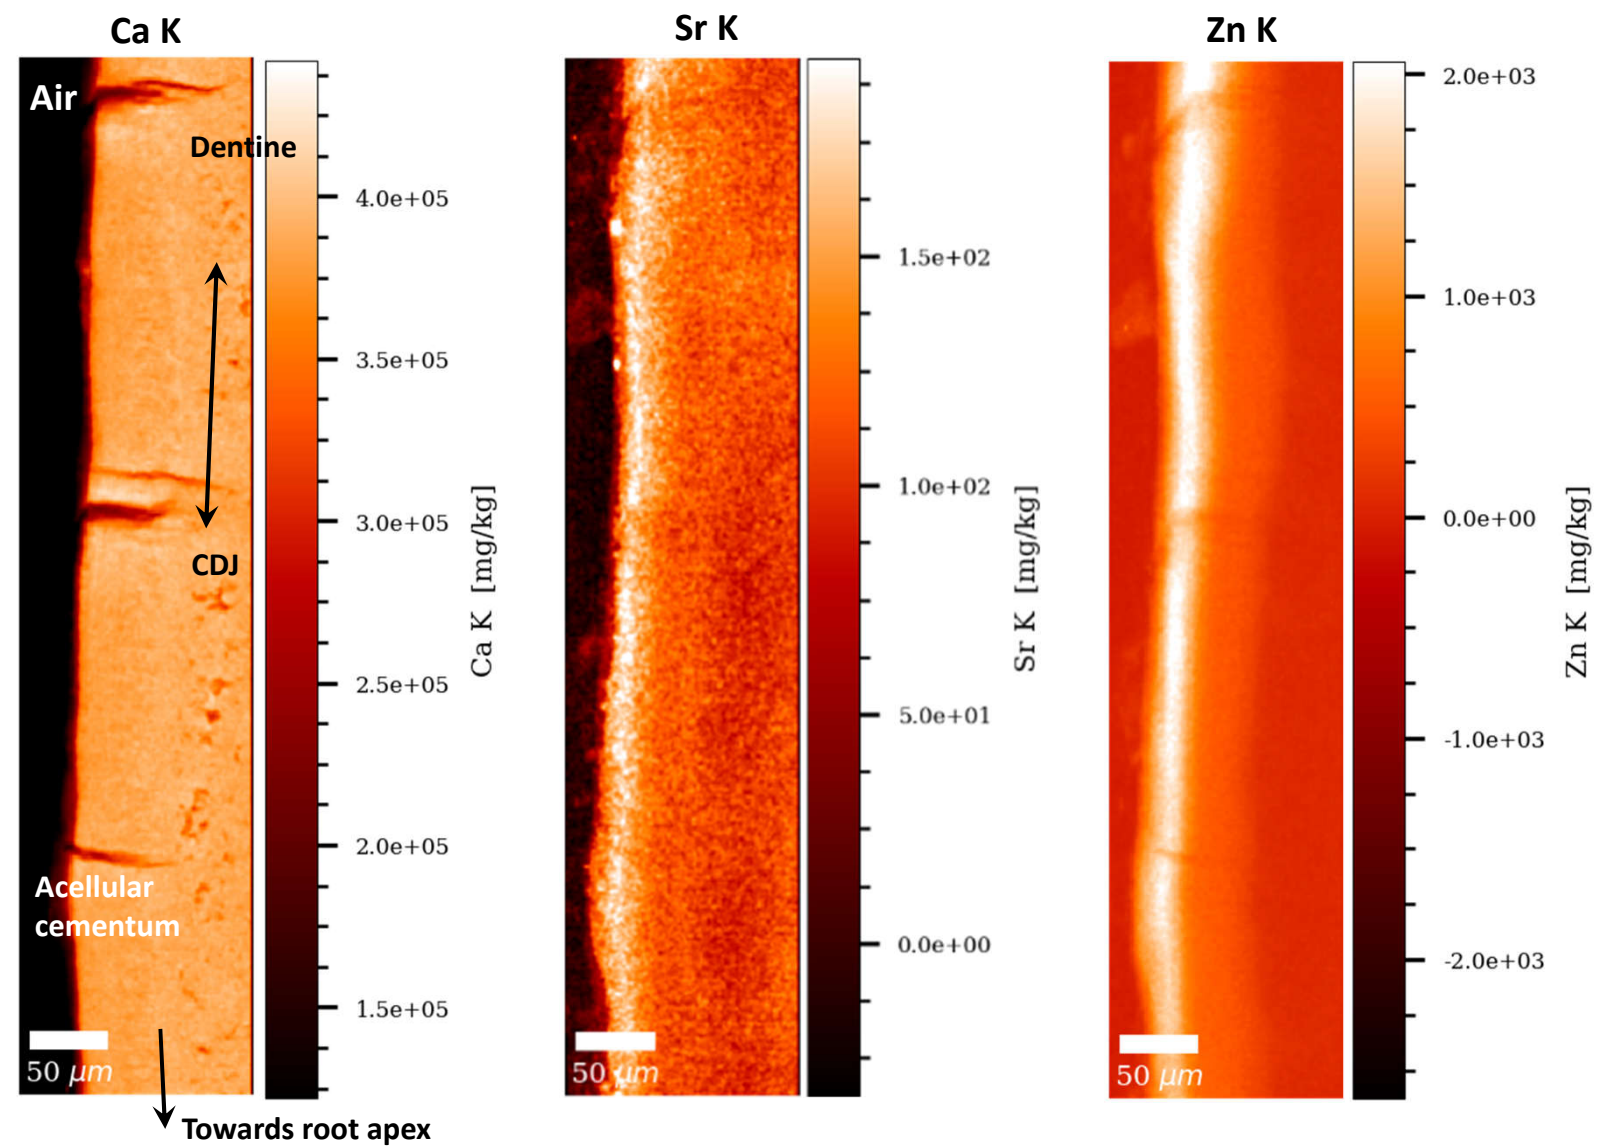

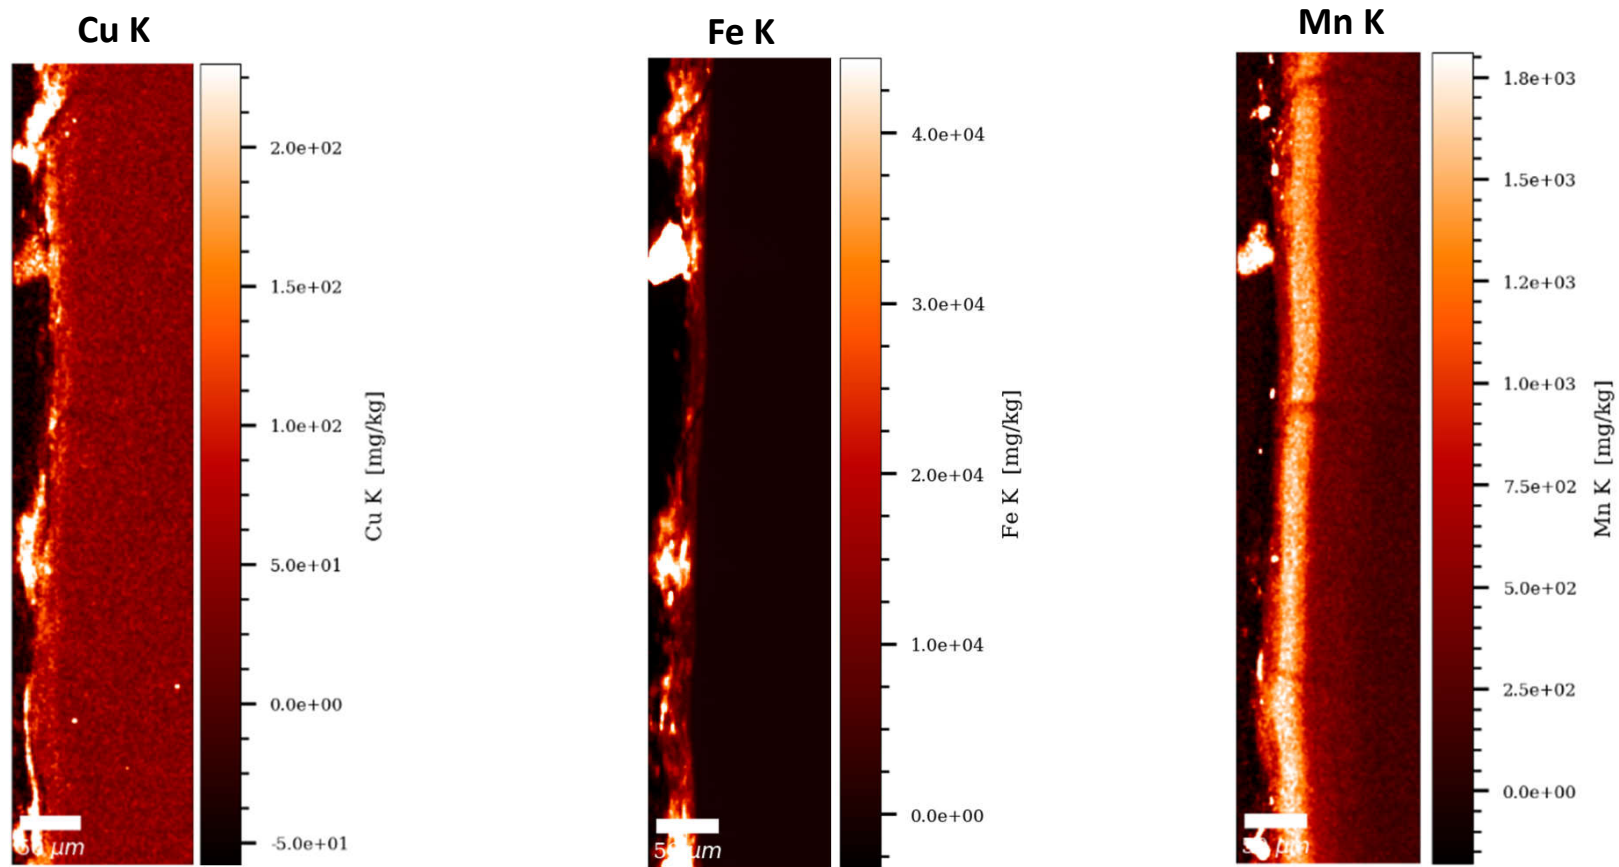



# Odense – 1149 ULM1

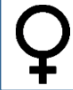

20-30 yrs. 1301 – 1415 cal. CE

Average tooth section thickness  
( $\mu\text{m}$ ): 103.5

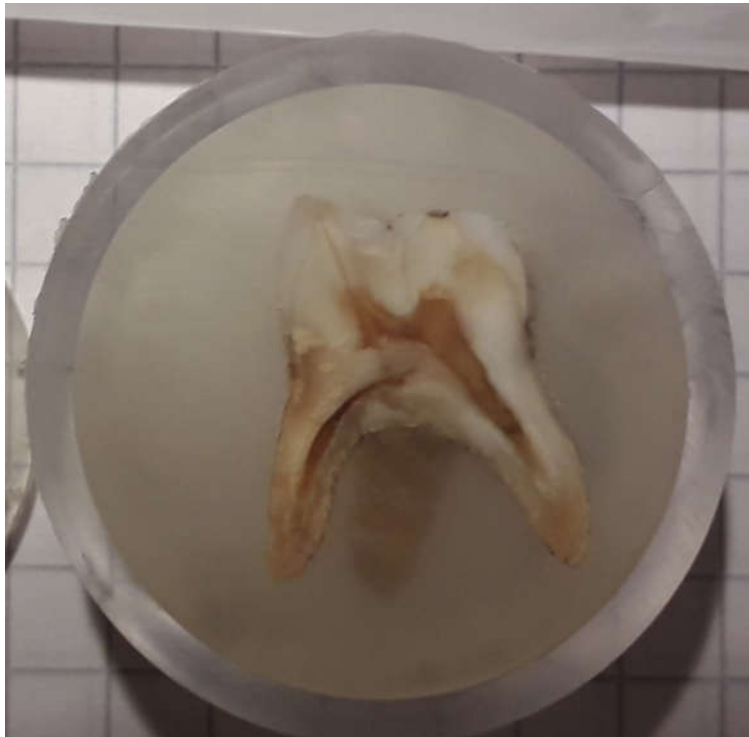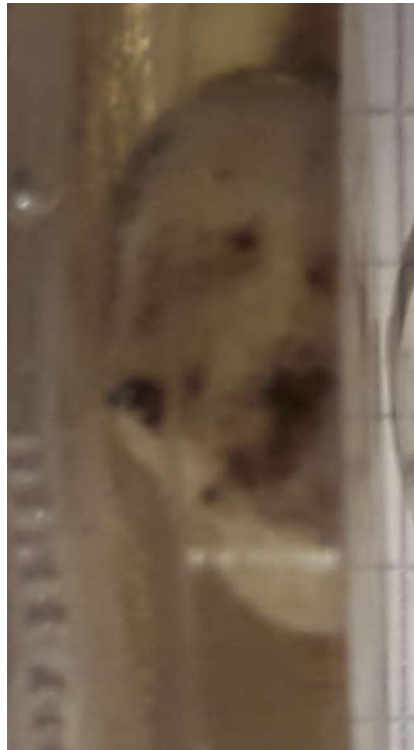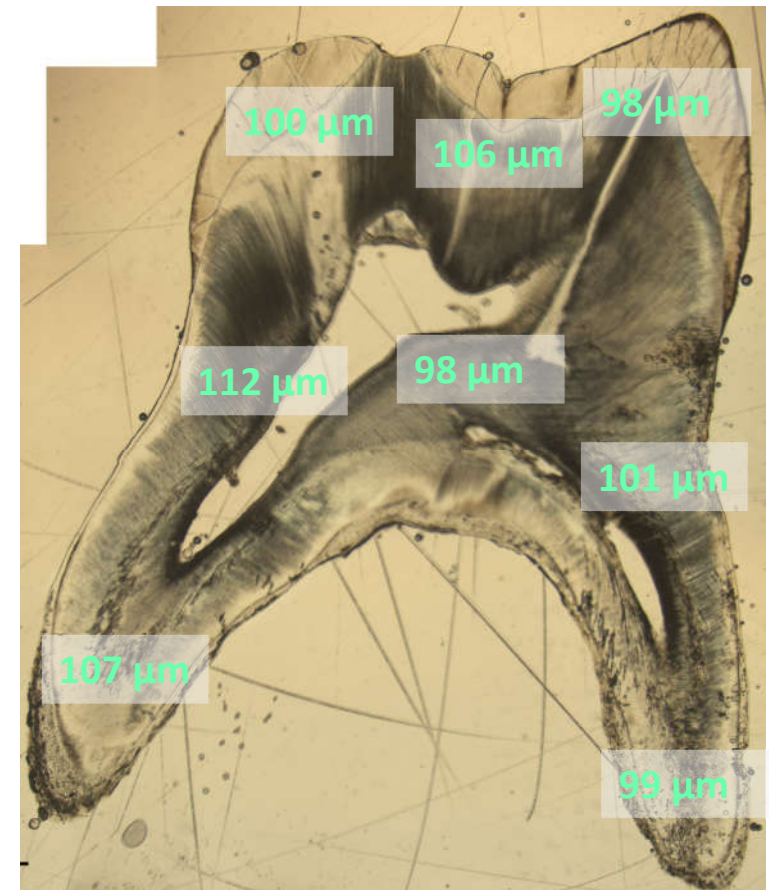

**Odense 1149 ULM1**

**Overview at 10  $\mu\text{m}$**

*Problem of offset when  
centering sample*

**High resolution at 1  $\mu\text{m}$  in  
mixed cellular and acellular  
cementum**

**Scanning**

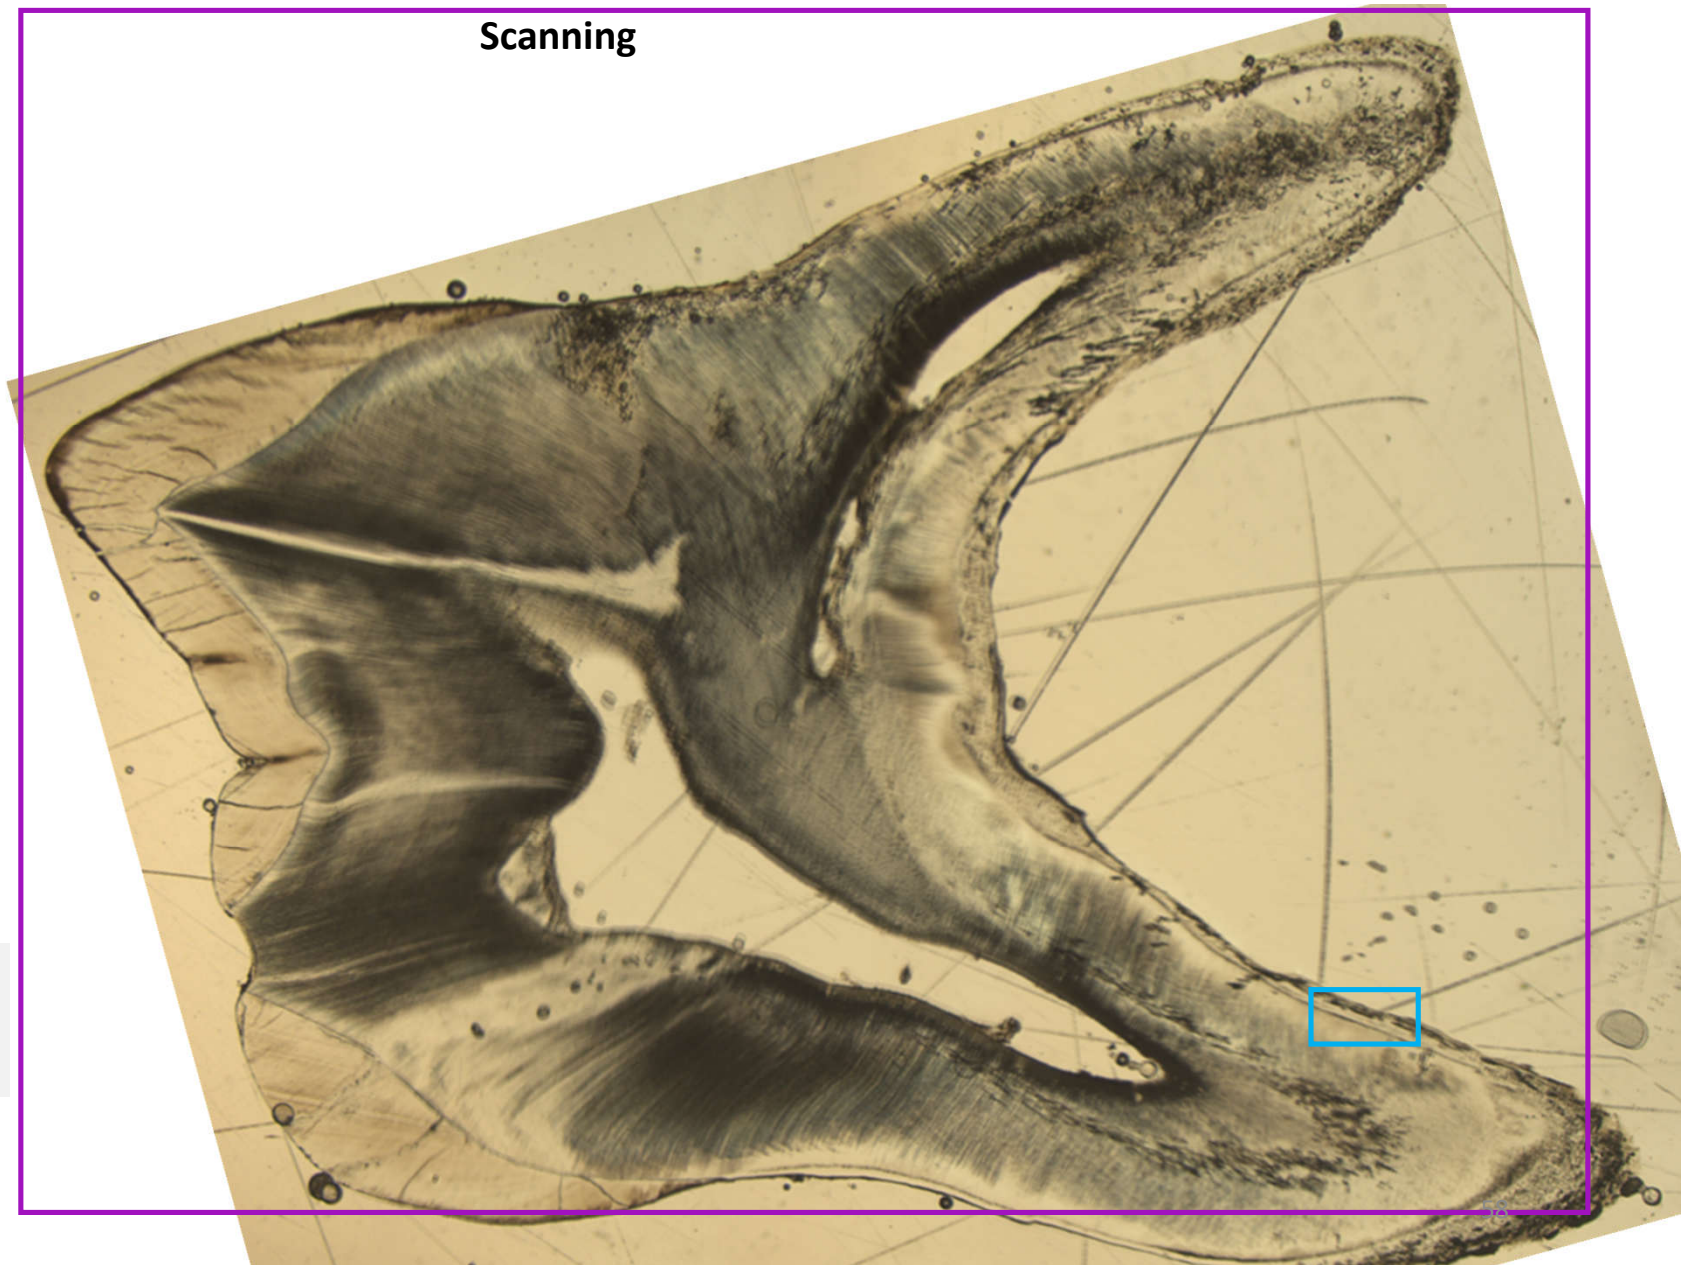



Ca K

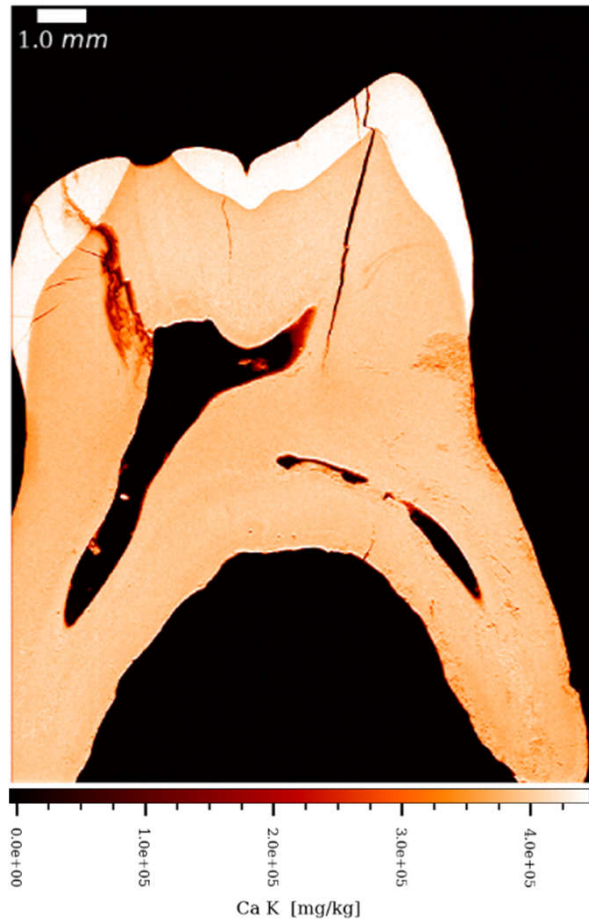

Sr K

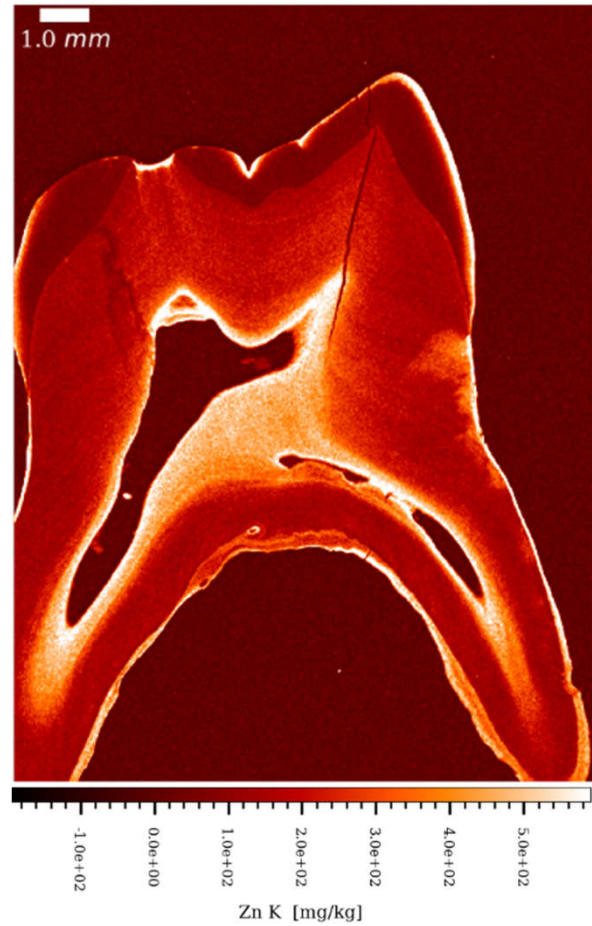

Zn K

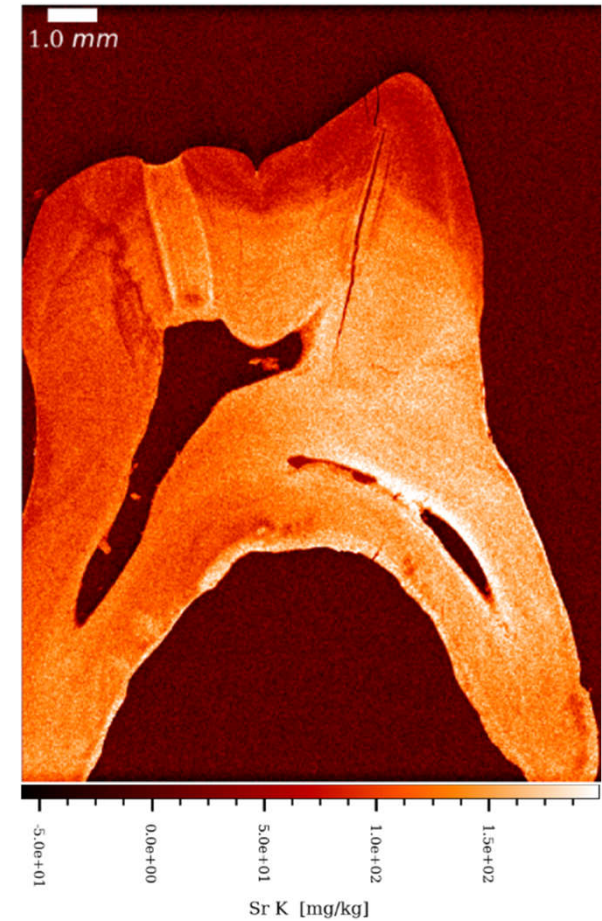

Cu K

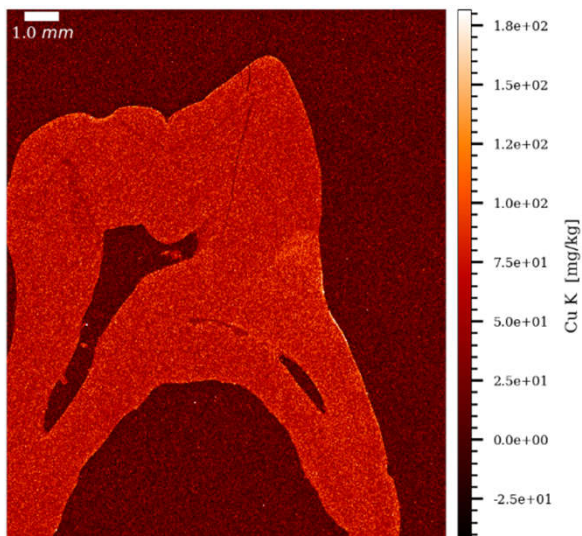

Fe K

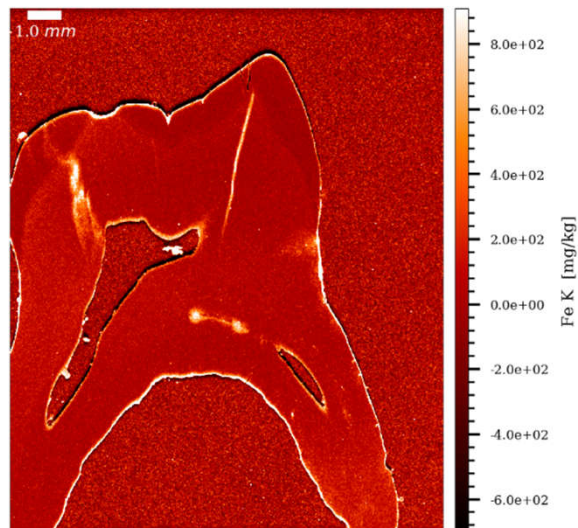

Mn K

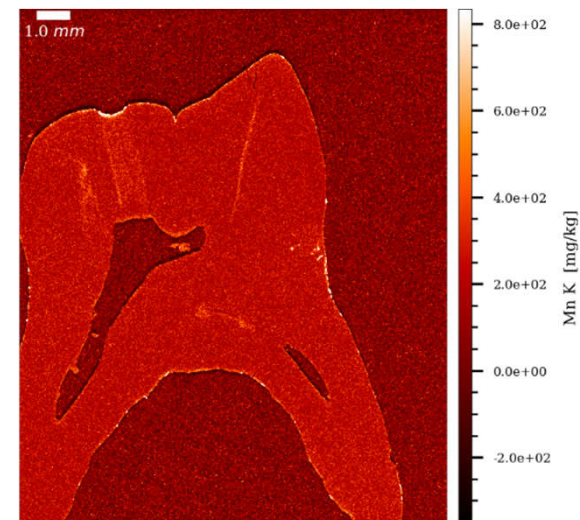



Odense 1149 ULM1

Overview at 10  $\mu\text{m}$

Uncalibrated data  
(arbitrary units)

Gauss (1x1)

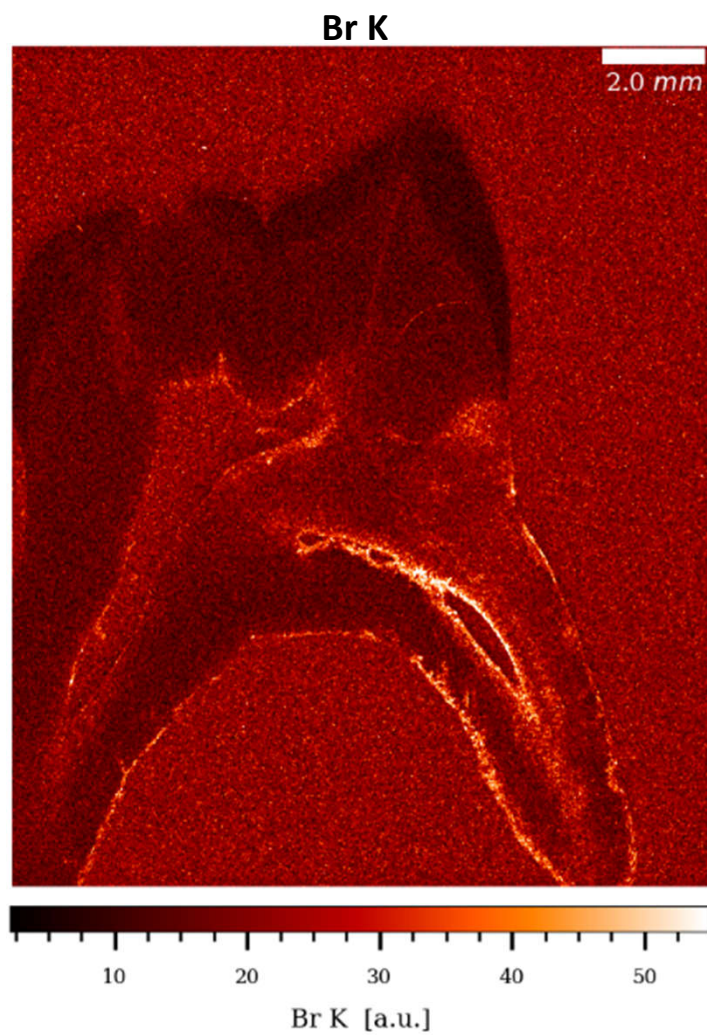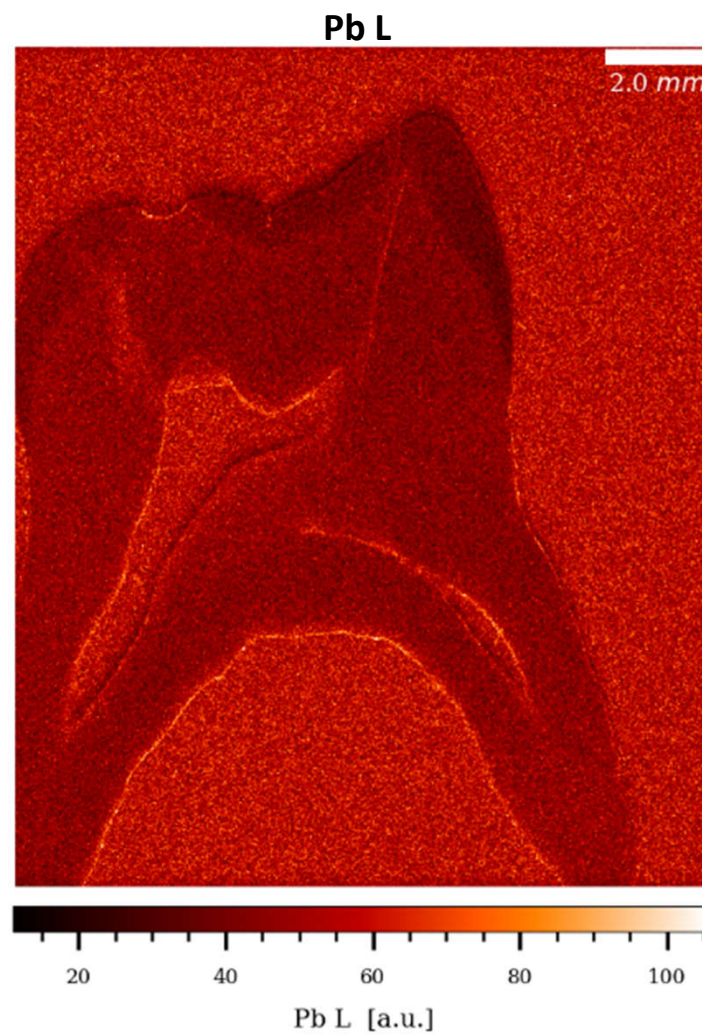



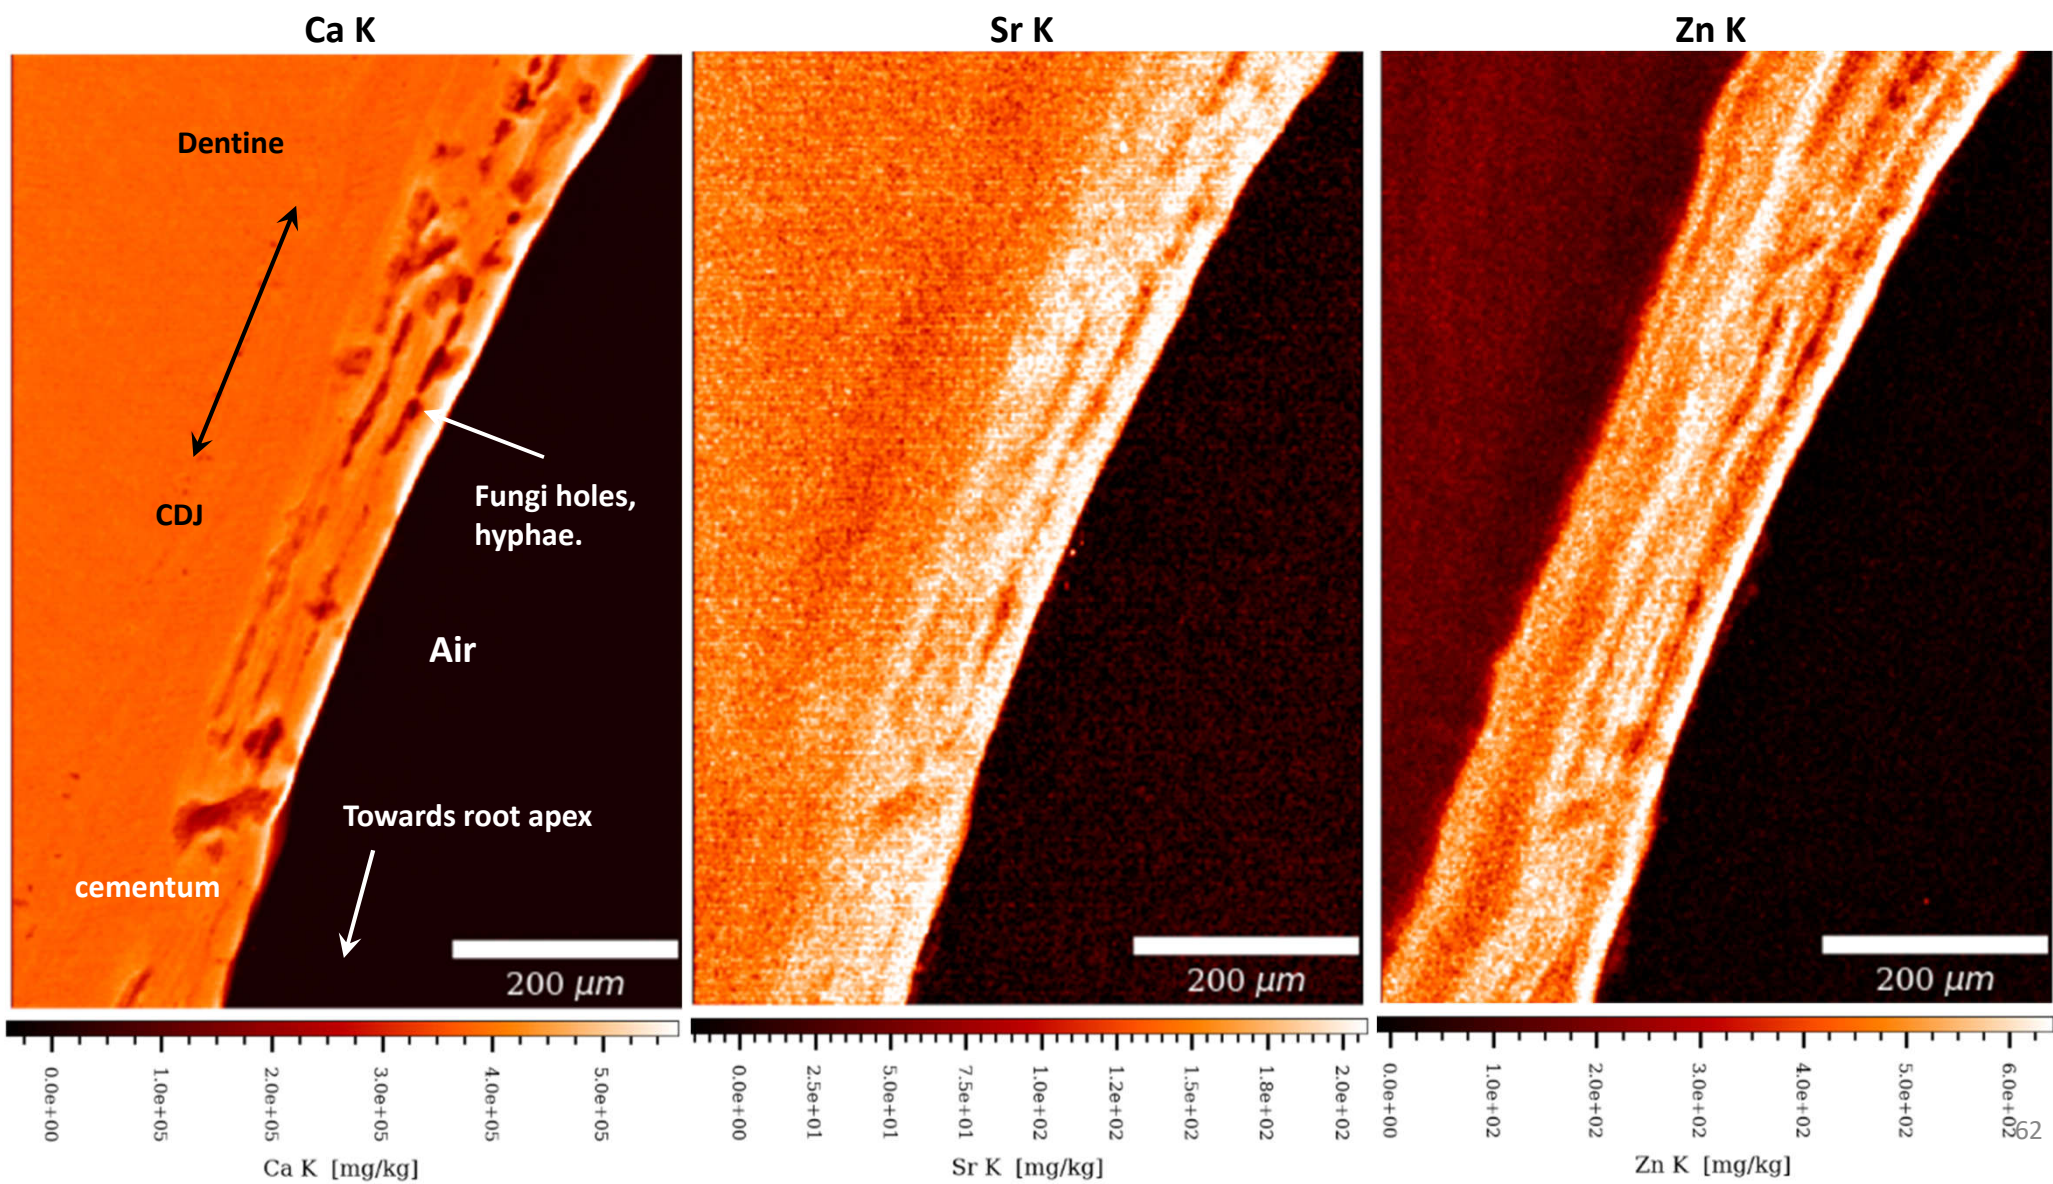



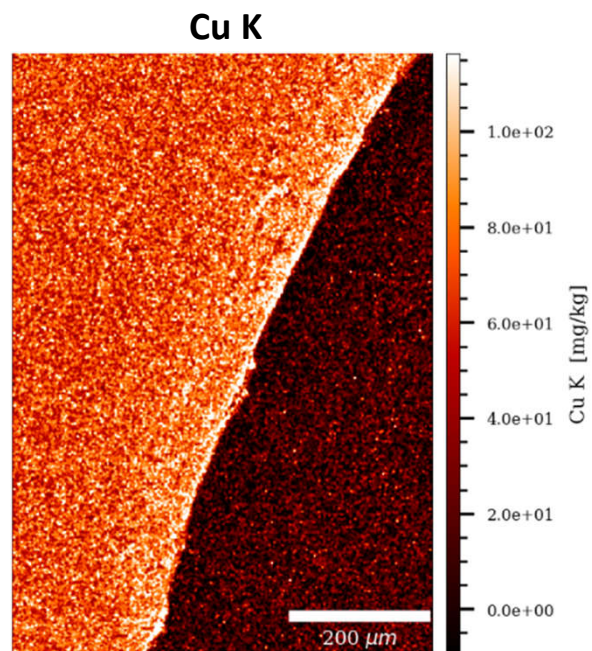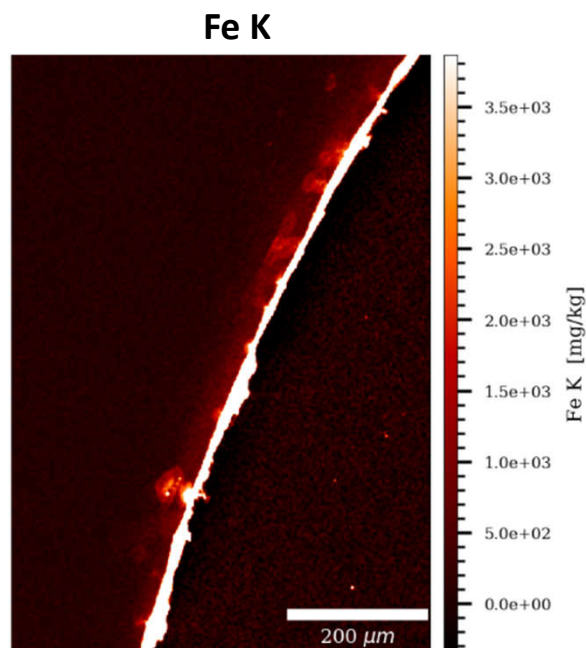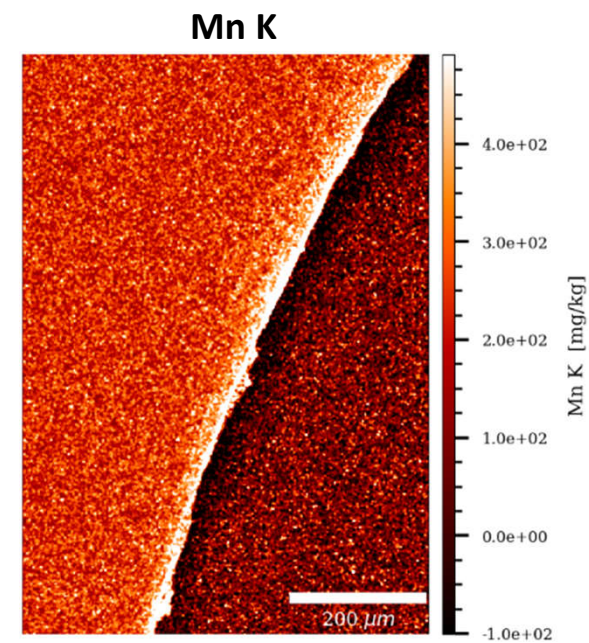

# Næstved – 6 ULC

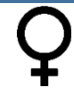

~20 yrs. mid-13<sup>th</sup> – mid-16<sup>th</sup> c. CE

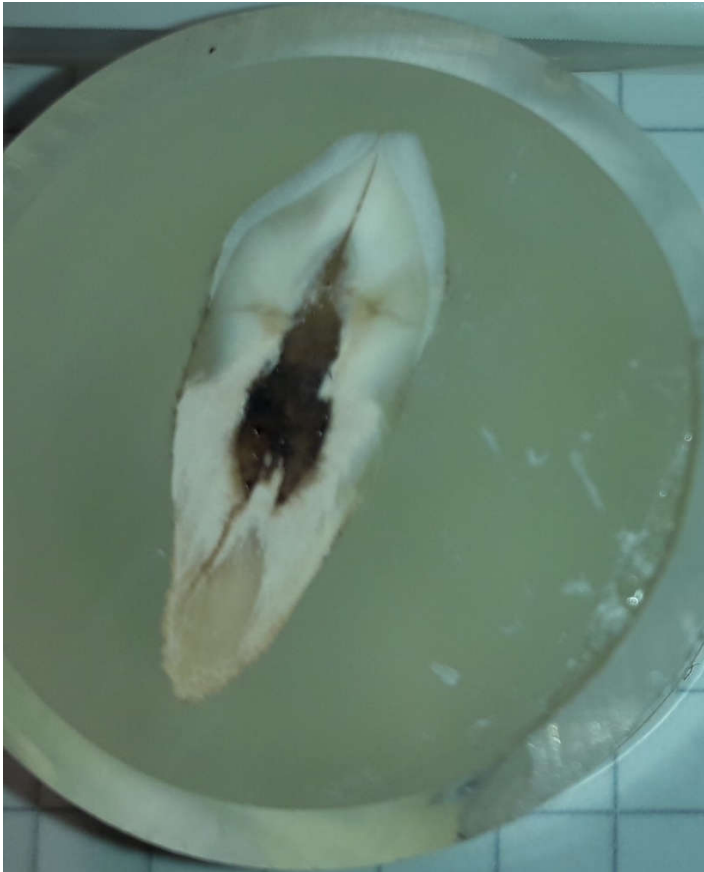

Average tooth section  
thickness ( $\mu\text{m}$ ): 115.0

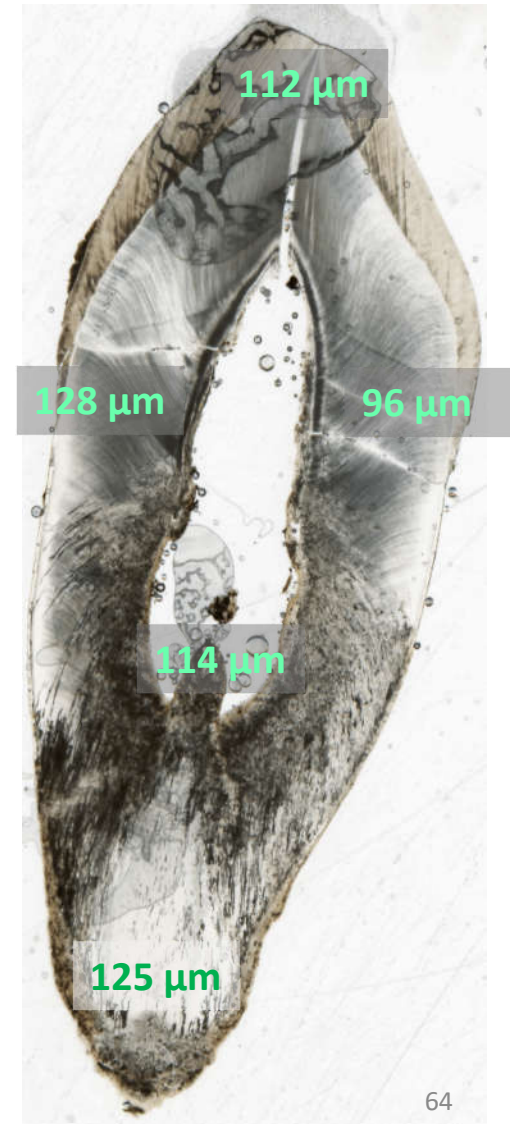



Overview at 10  $\mu\text{m}$

High resolution at 1  $\mu\text{m}$  in acellular cementum

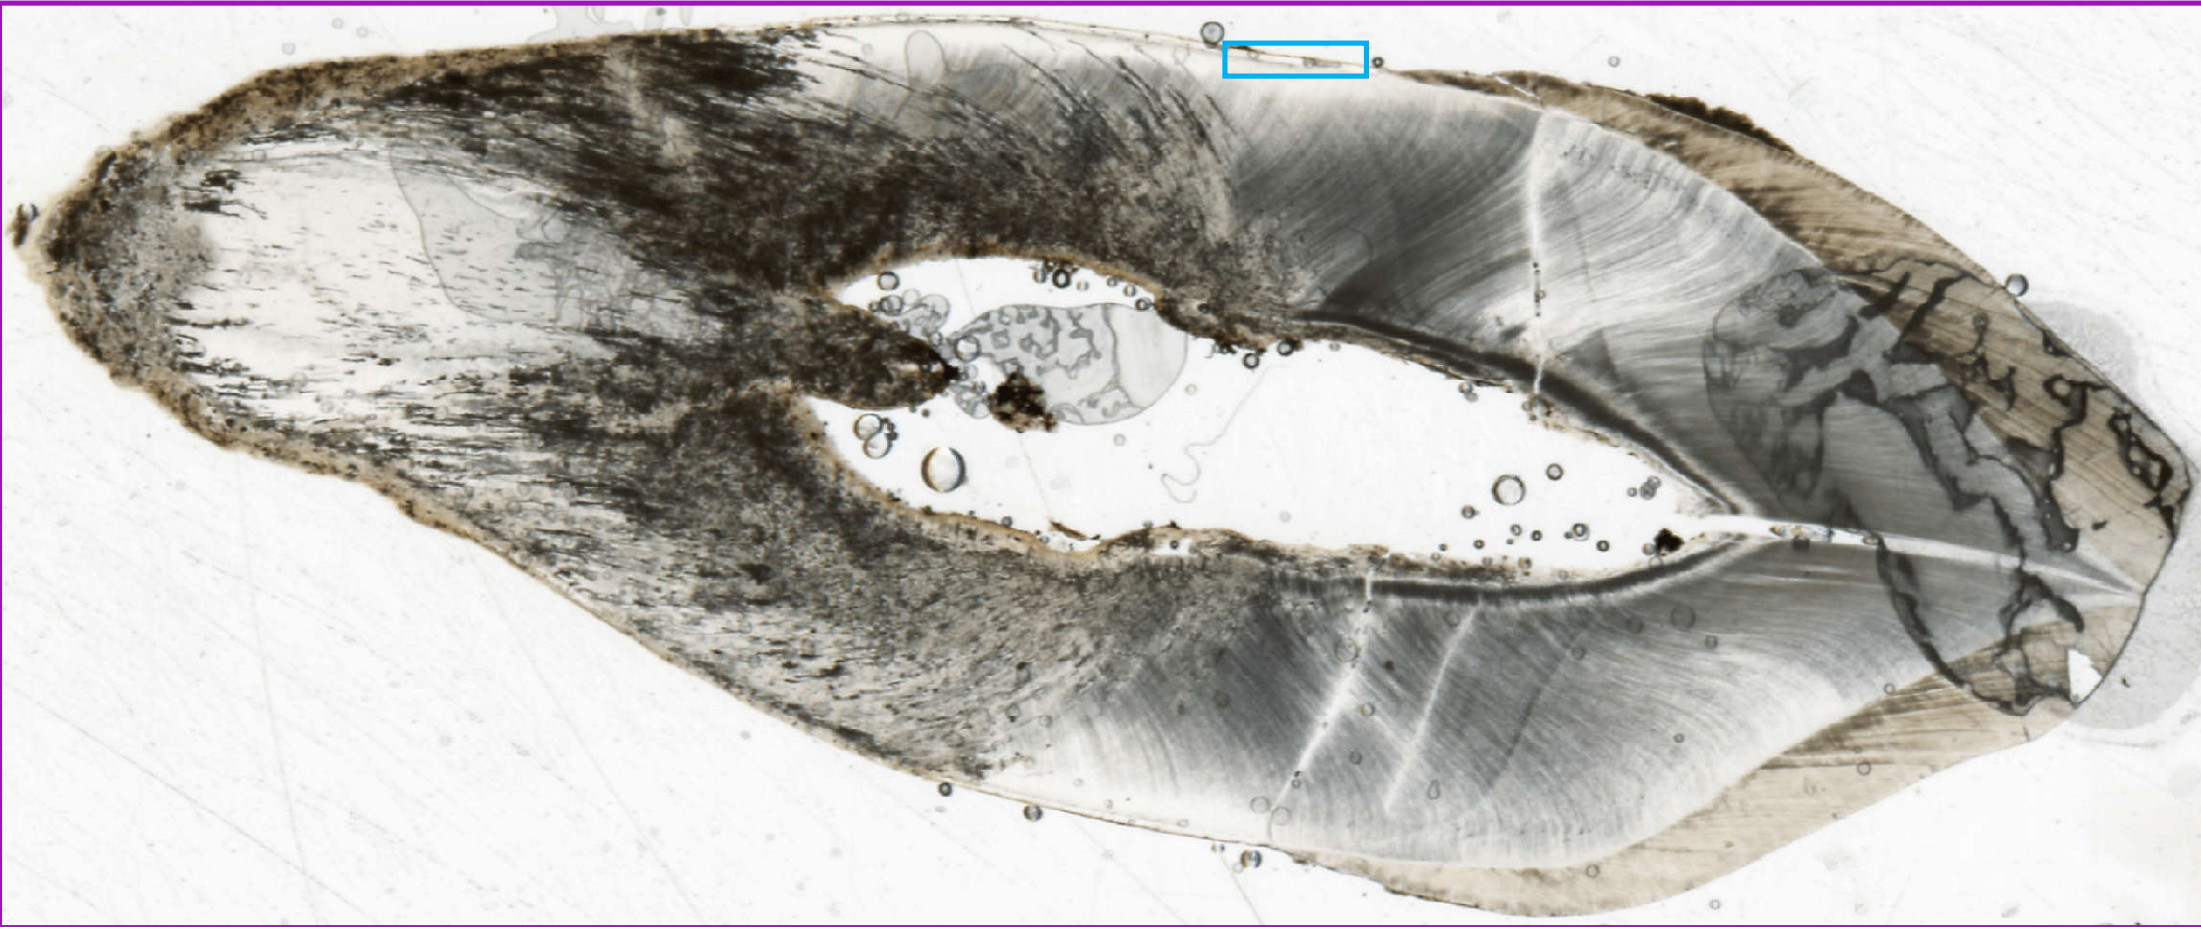

Næstved 6 ULC

Overview at 10  $\mu$ m

Gauss (1x1)

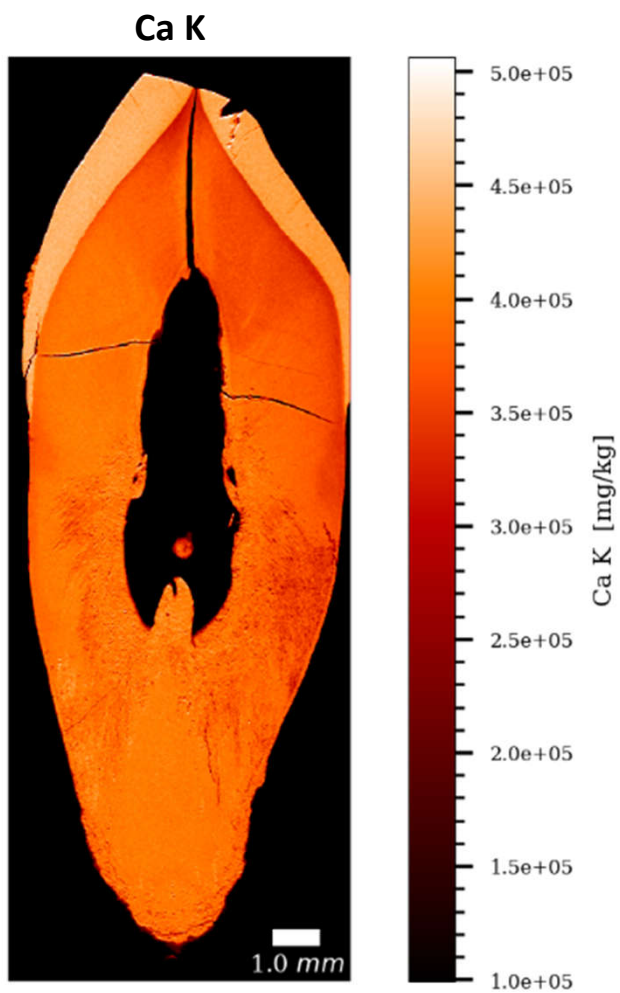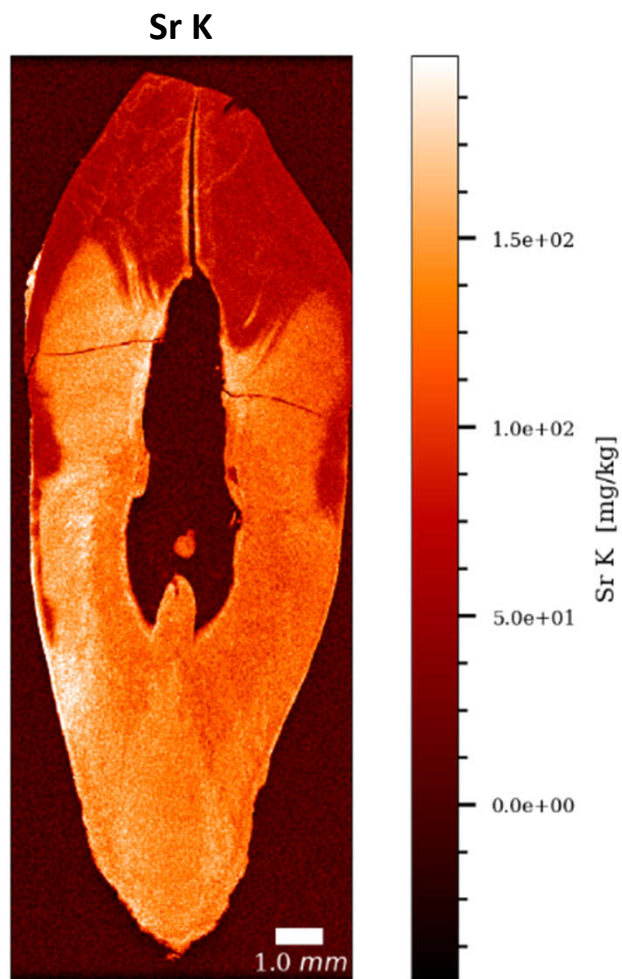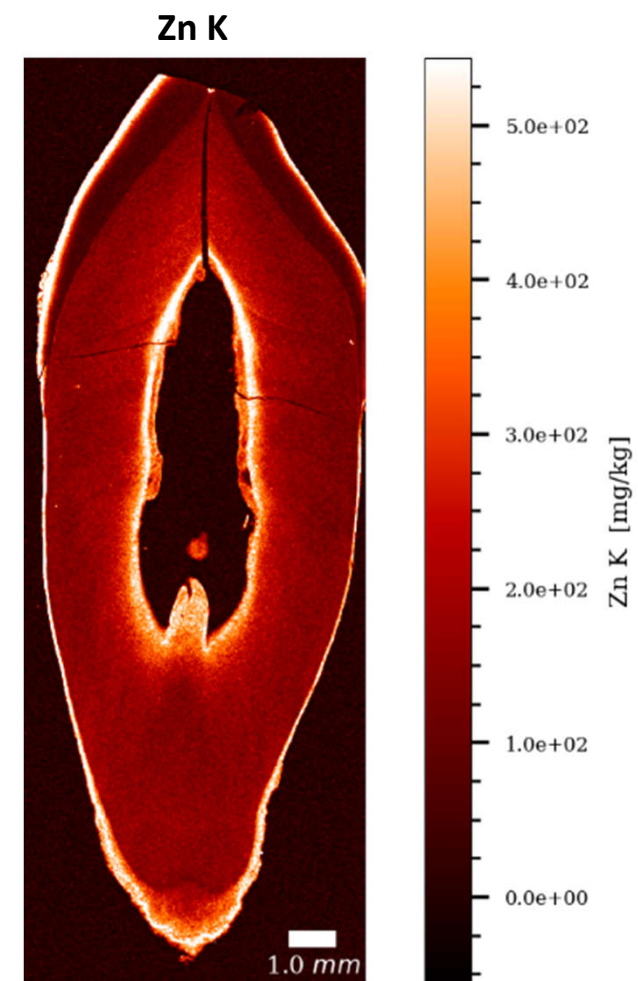



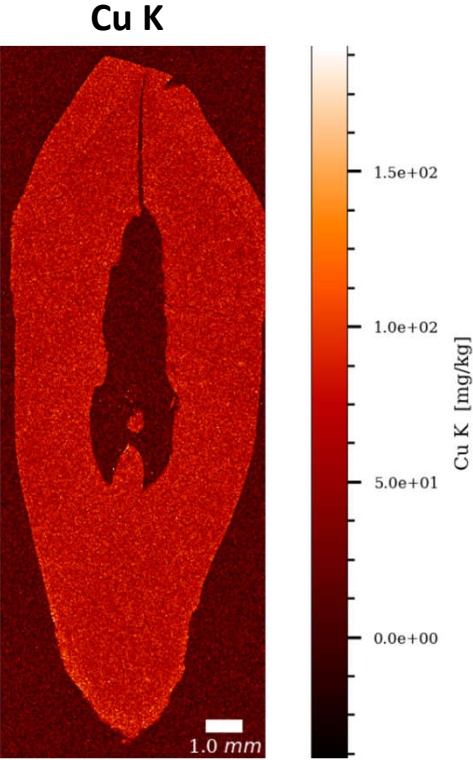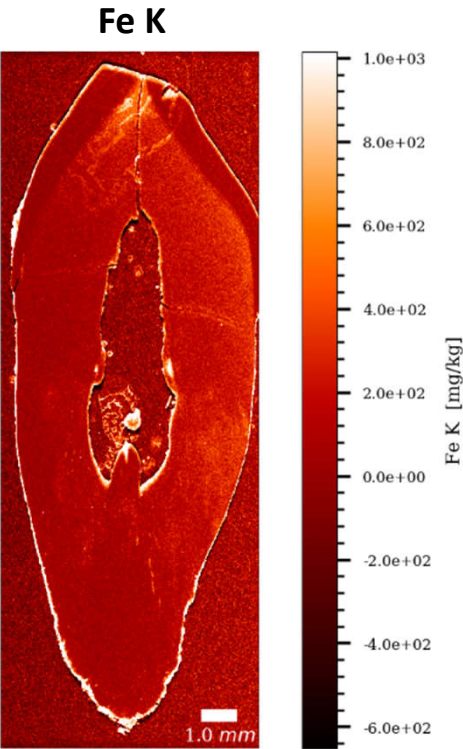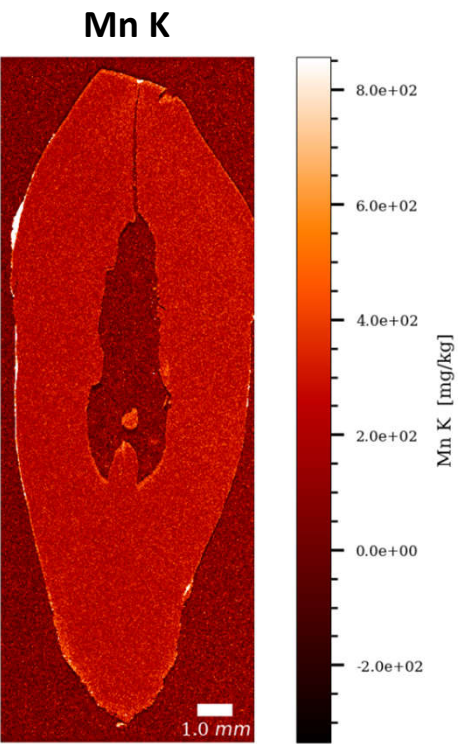

Uncalibrated data  
(arbitrary units)

Gauss (1x1)

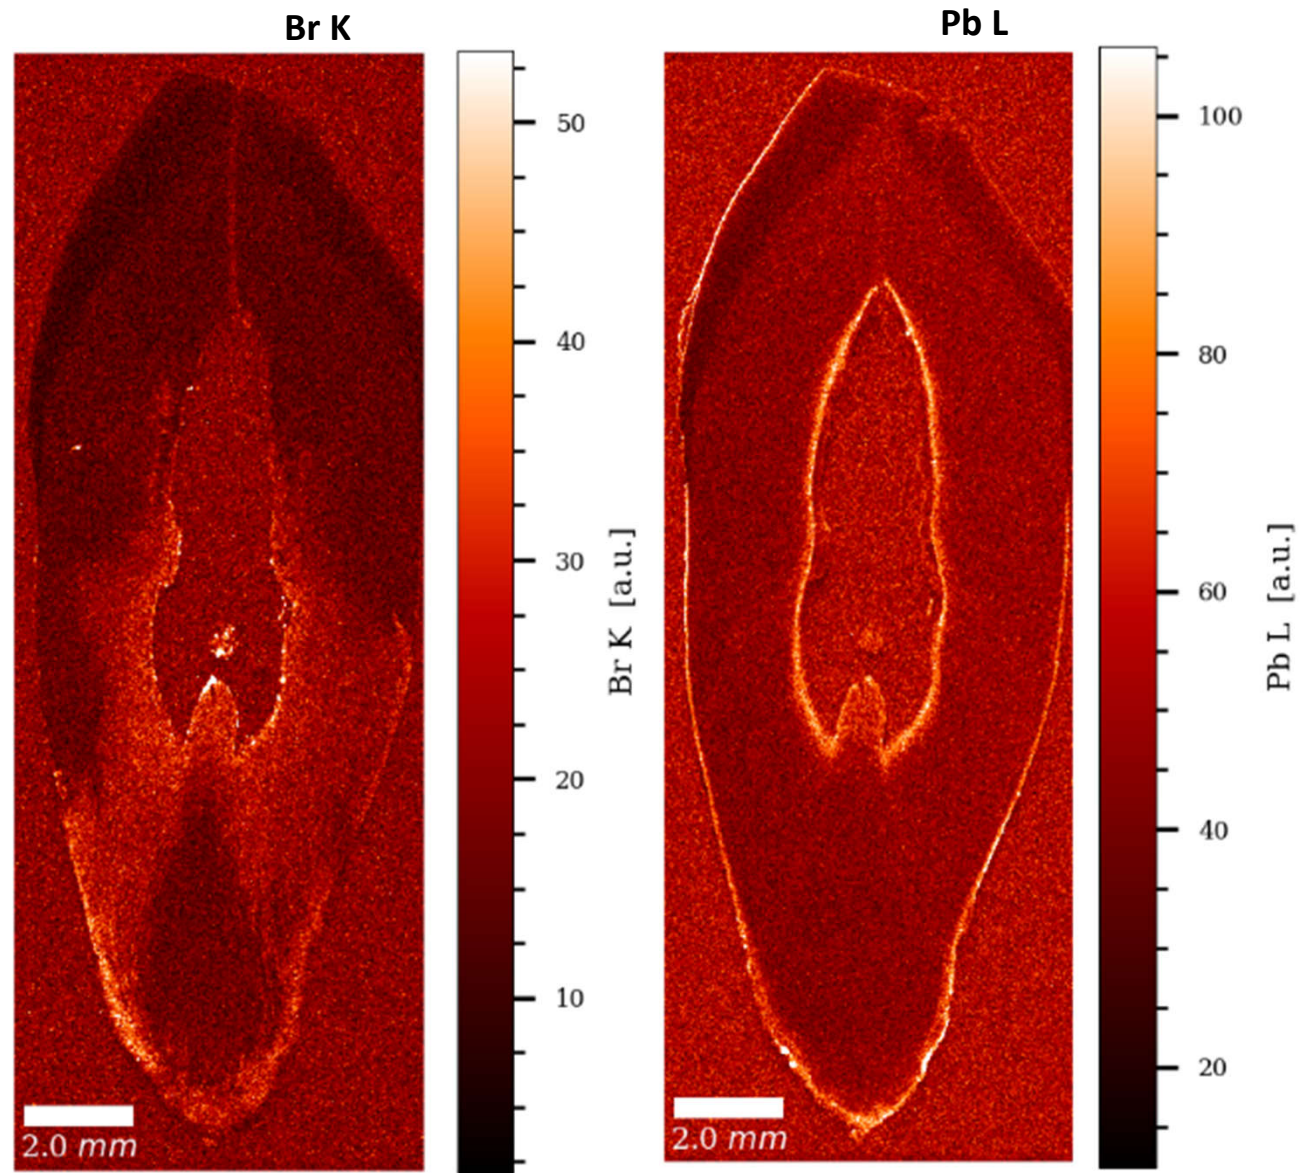



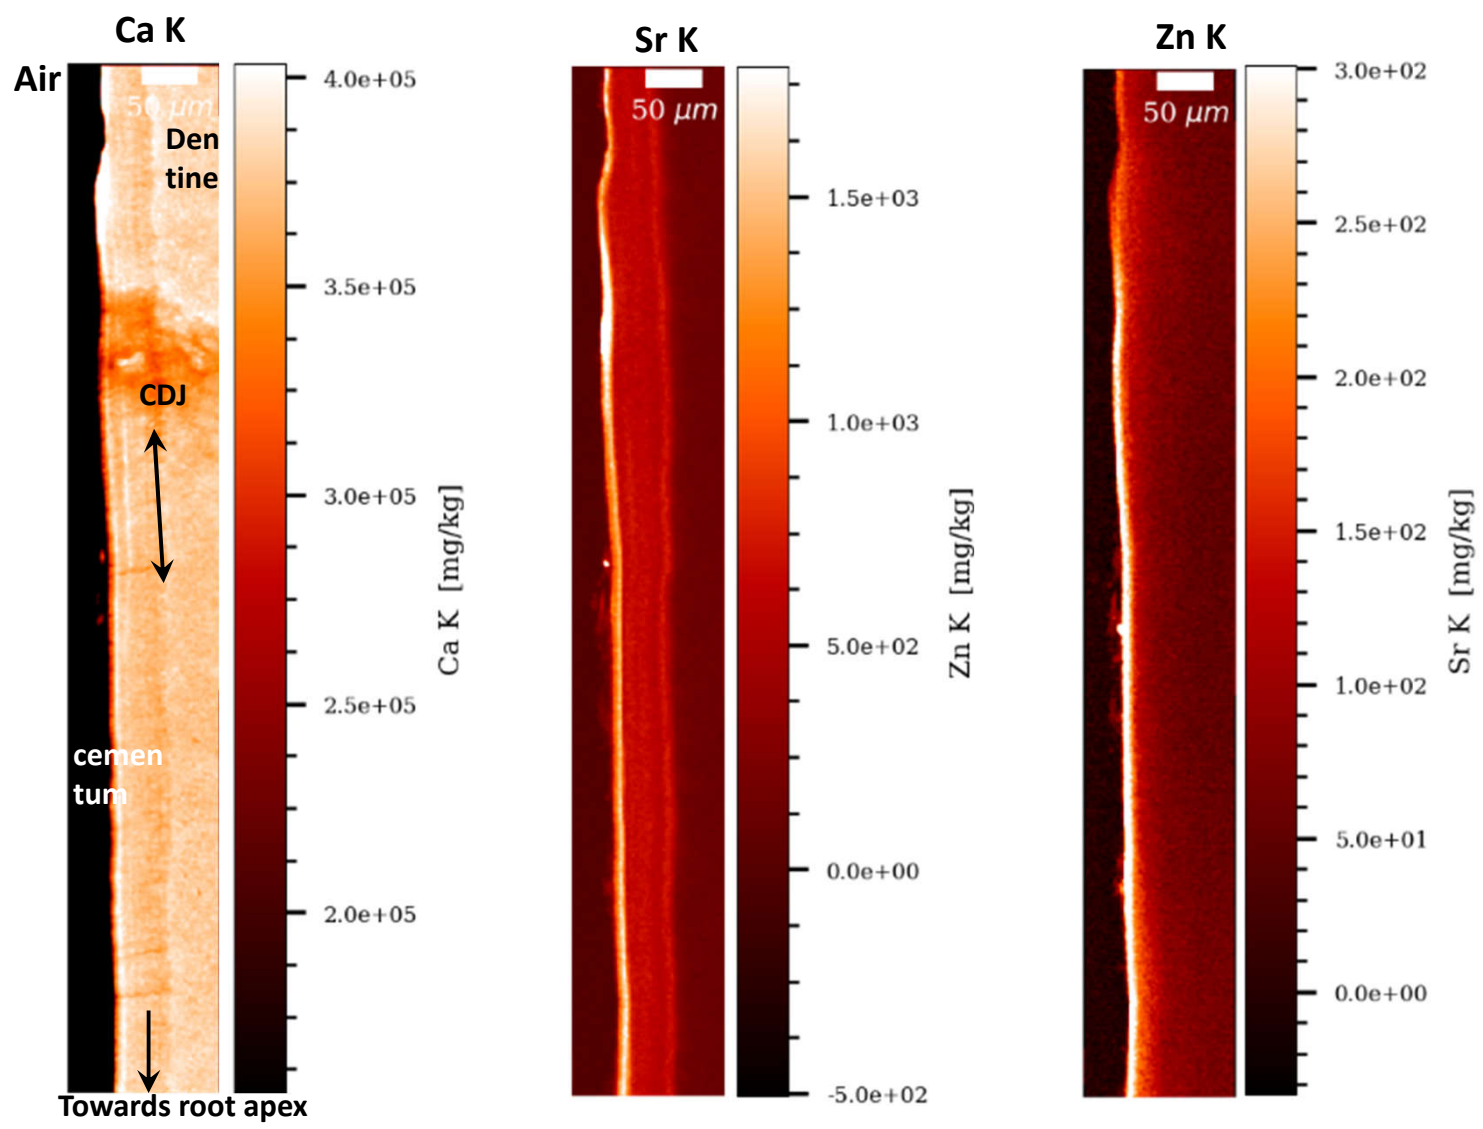

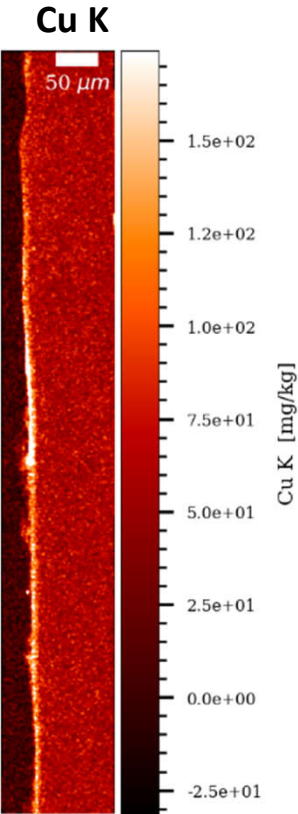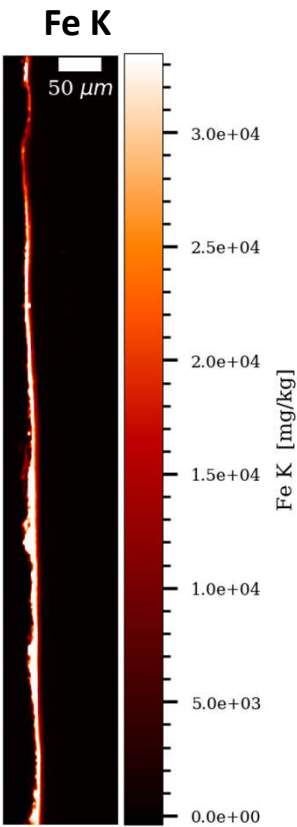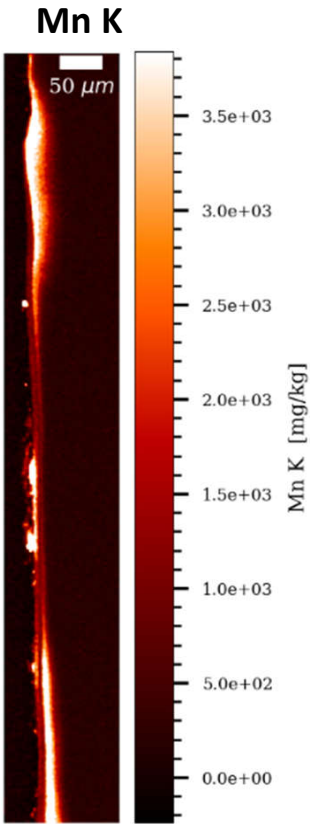



# Næstved – 211 URC

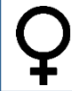

40-45 yrs. 1184 – 1266 cal. CE

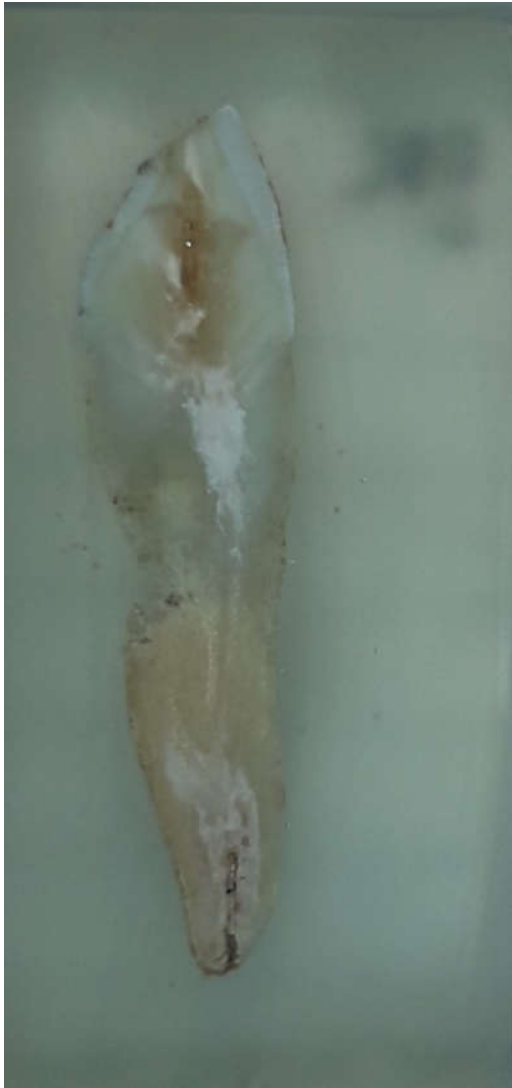

Average tooth section  
thickness ( $\mu\text{m}$ ): 134.2

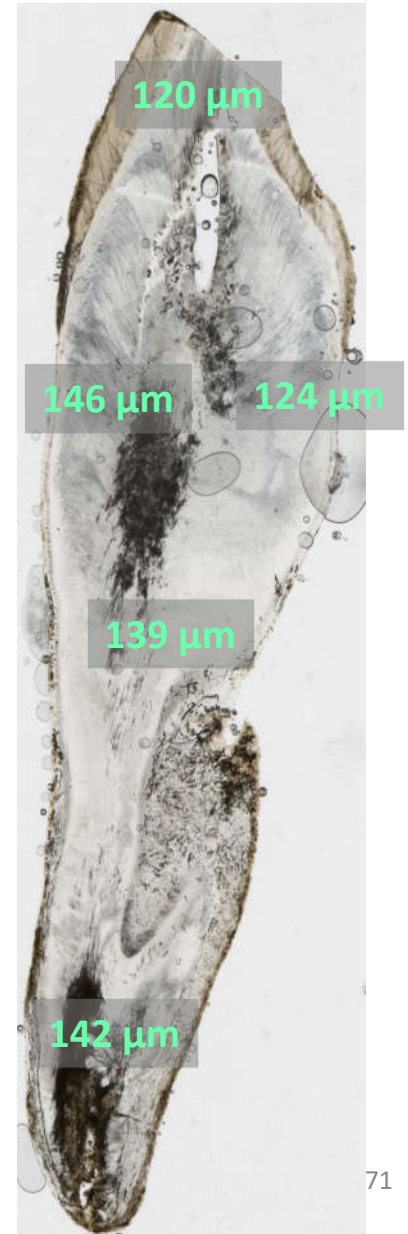

Overview at 10  $\mu\text{m}$

High resolution at 1  $\mu\text{m}$

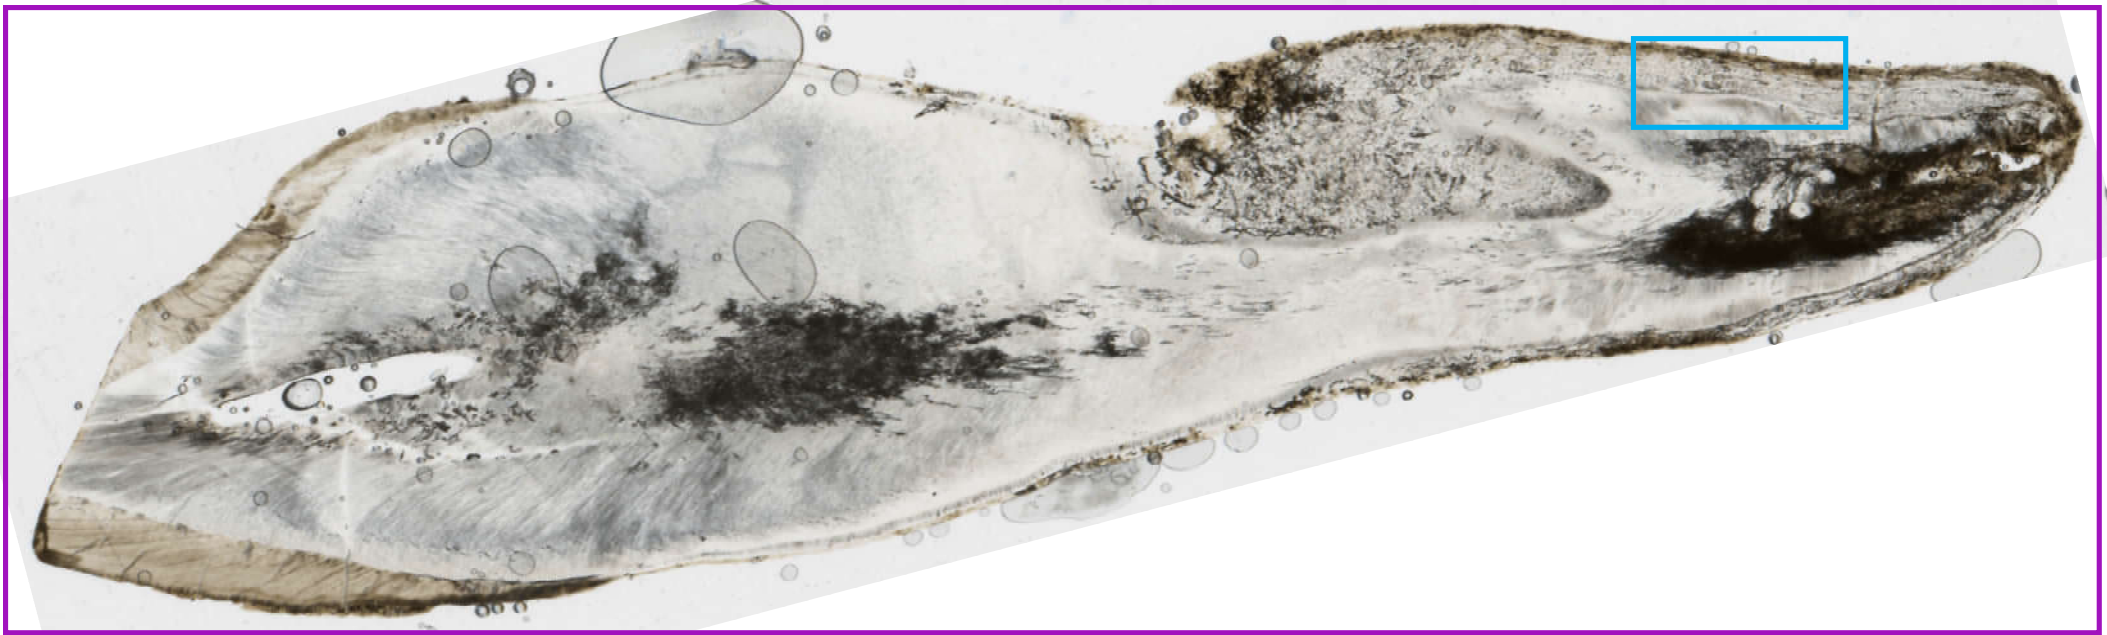



Næstved 211 URC

Overview at 10  $\mu$ m

Gauss (1.2x1.2)

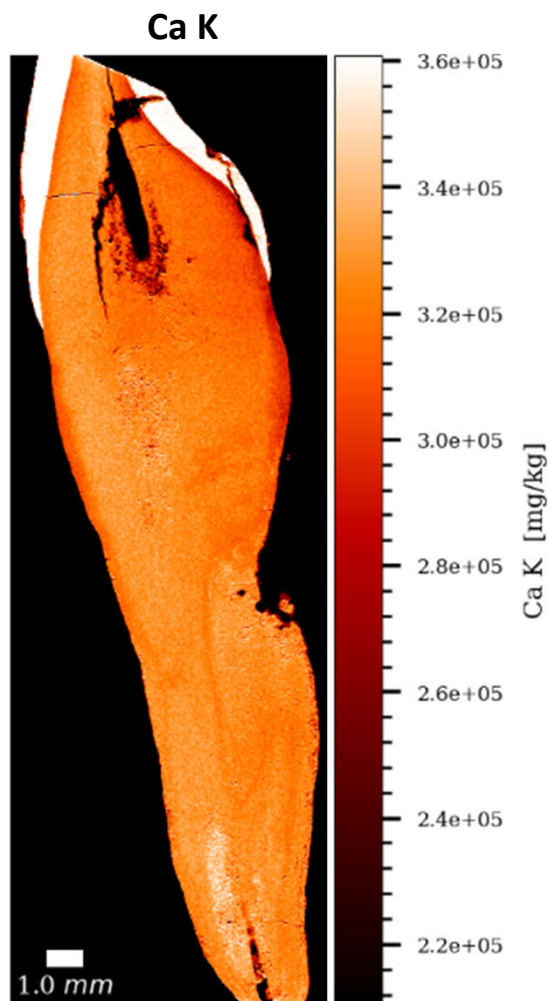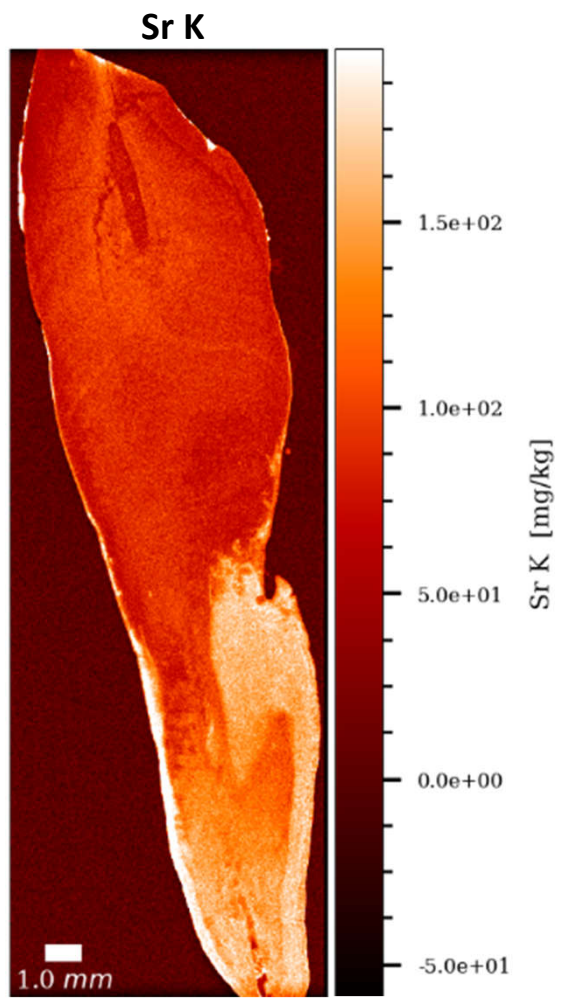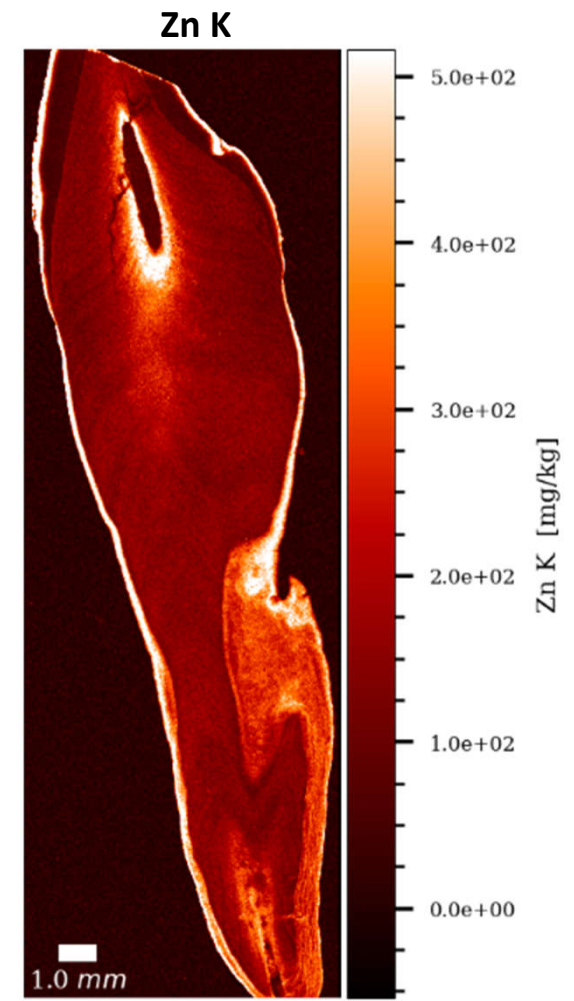

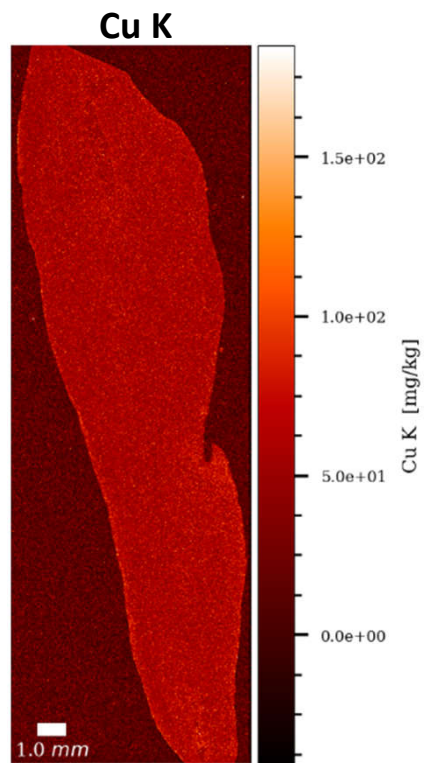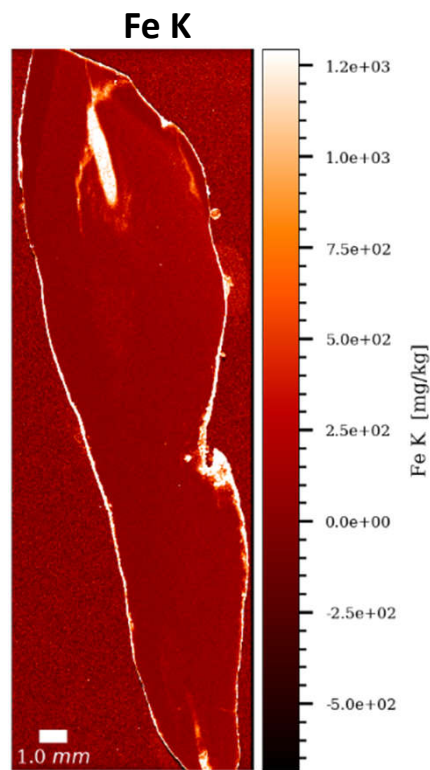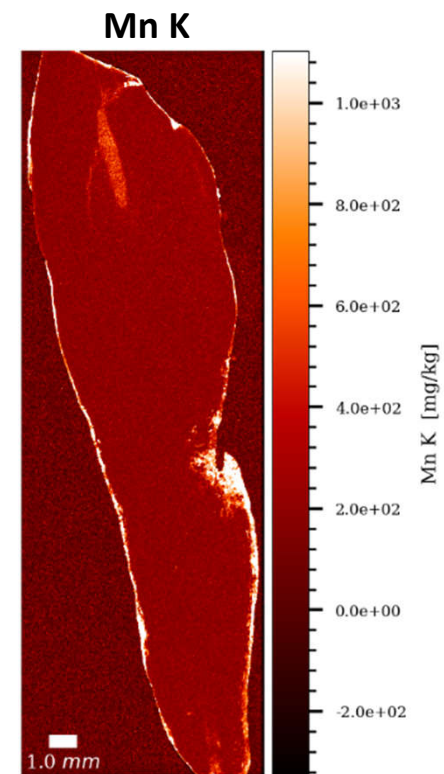



Næstved 211 URC

Overview at 10  $\mu\text{m}$

Uncalibrated data  
(arbitrary units)

Gauss (1.2x1.2)

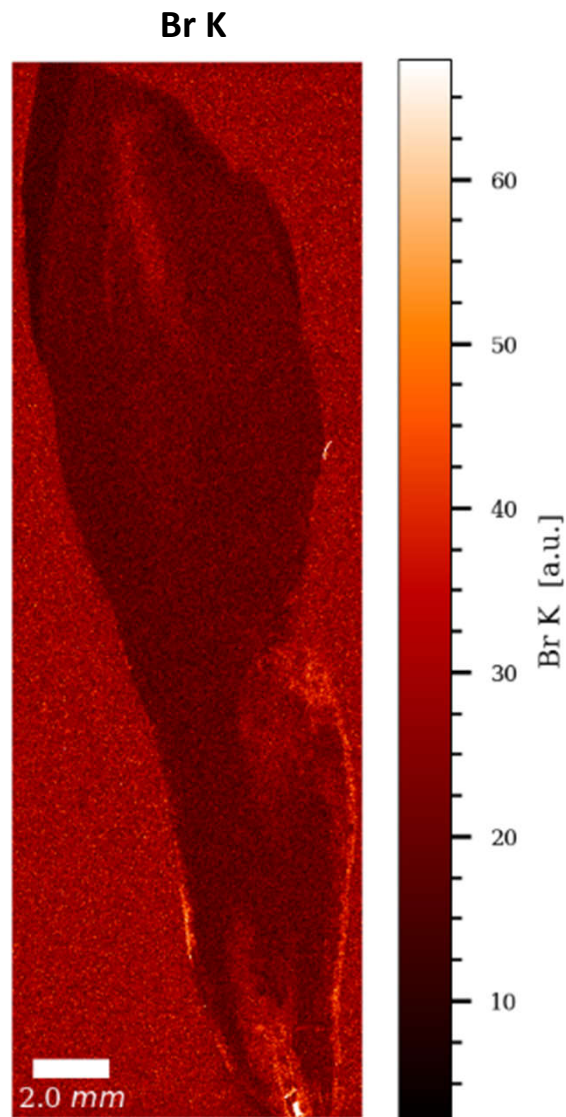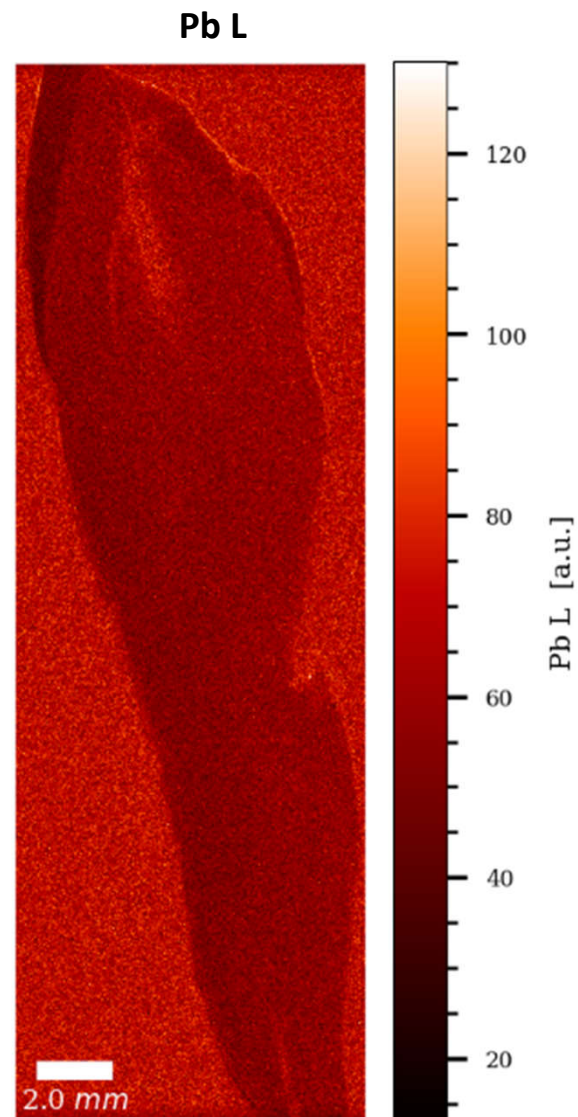

Næstved 211 URC

High resolution at 1  $\mu\text{m}$

Uncalibrated data  
(arbitrary units)

Gauss (1x1)

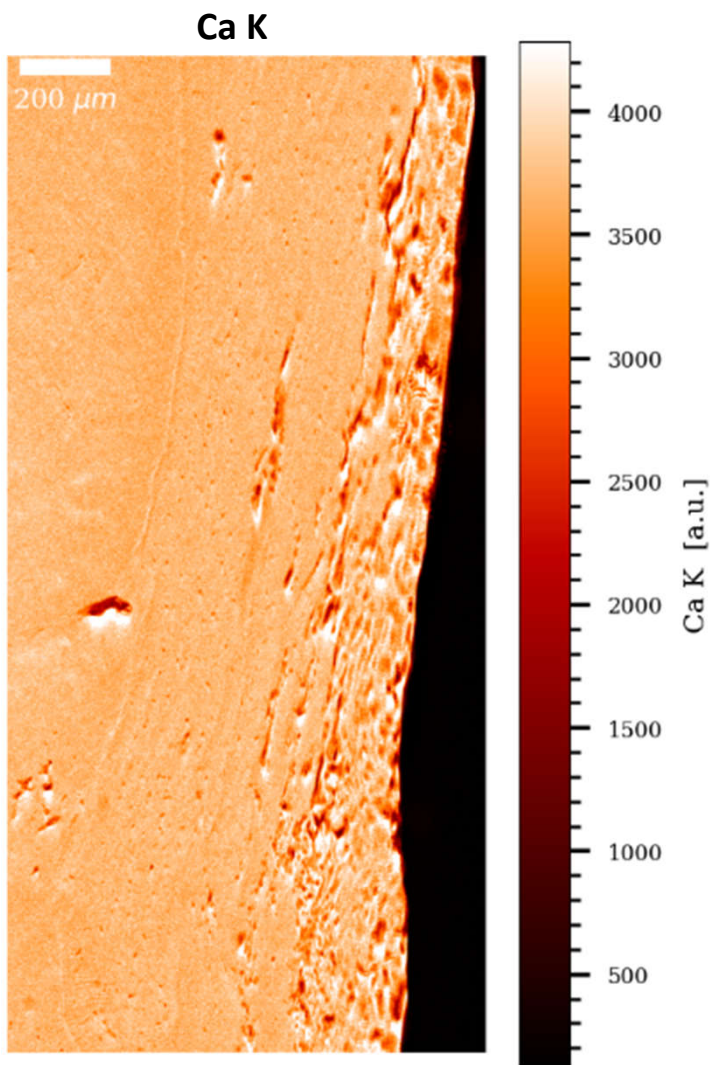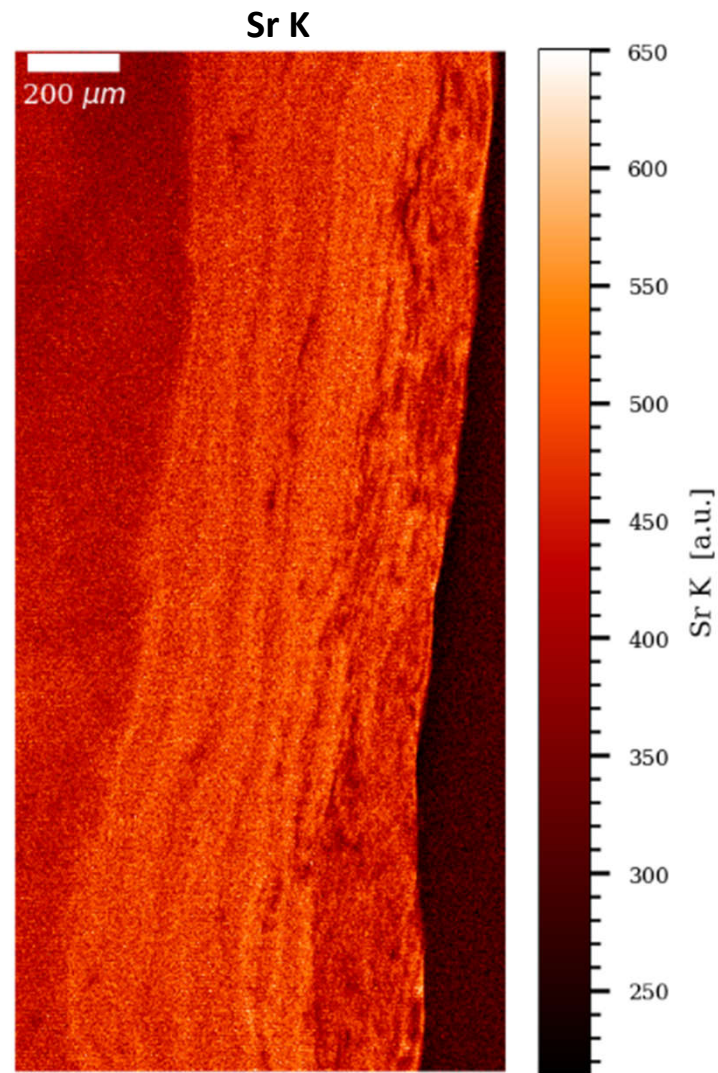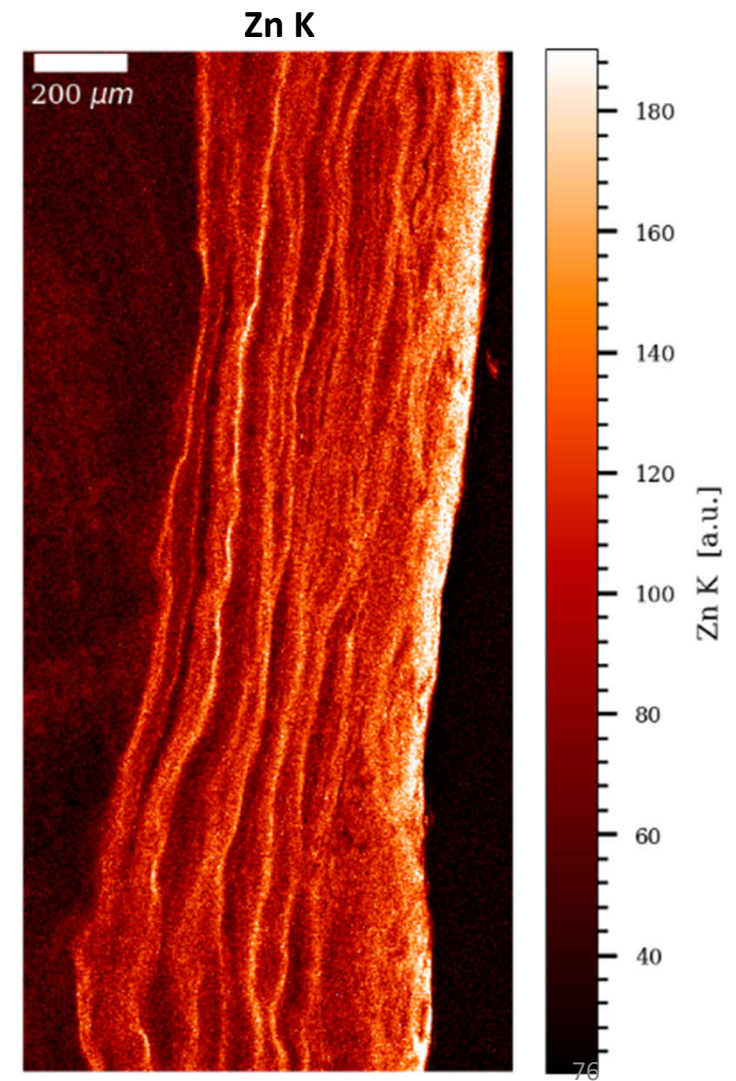



Næstved 211 URC

High resolution at 1  $\mu\text{m}$

Uncalibrated data  
(arbitrary units)

Gauss (1x1)

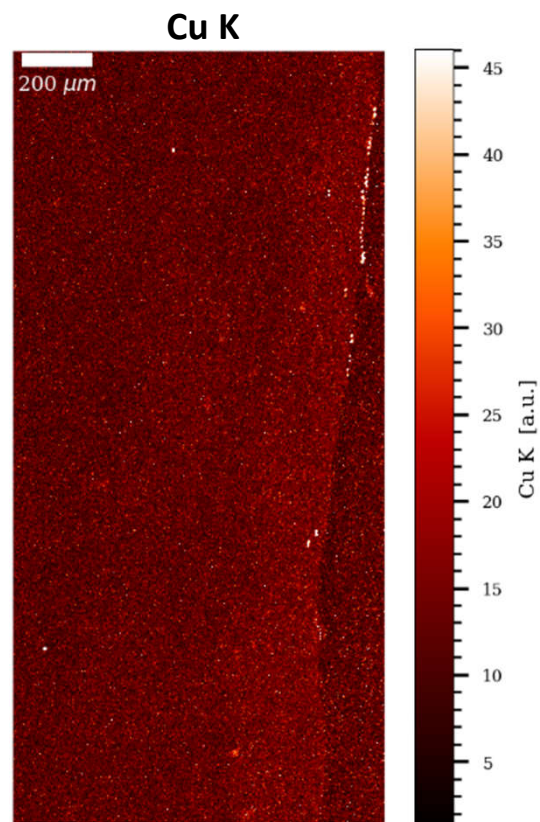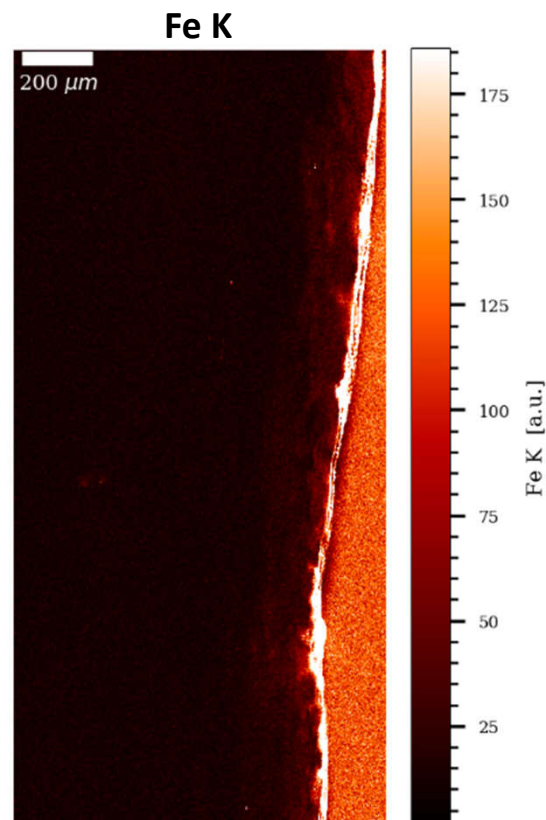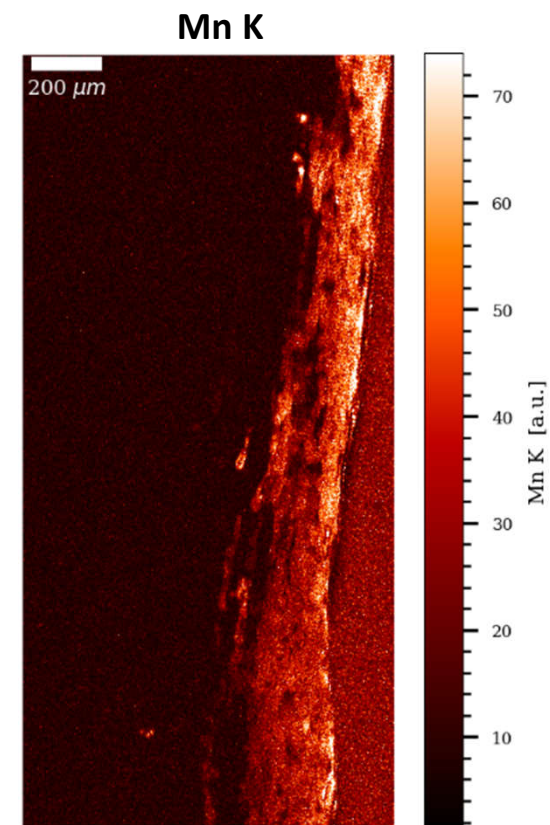

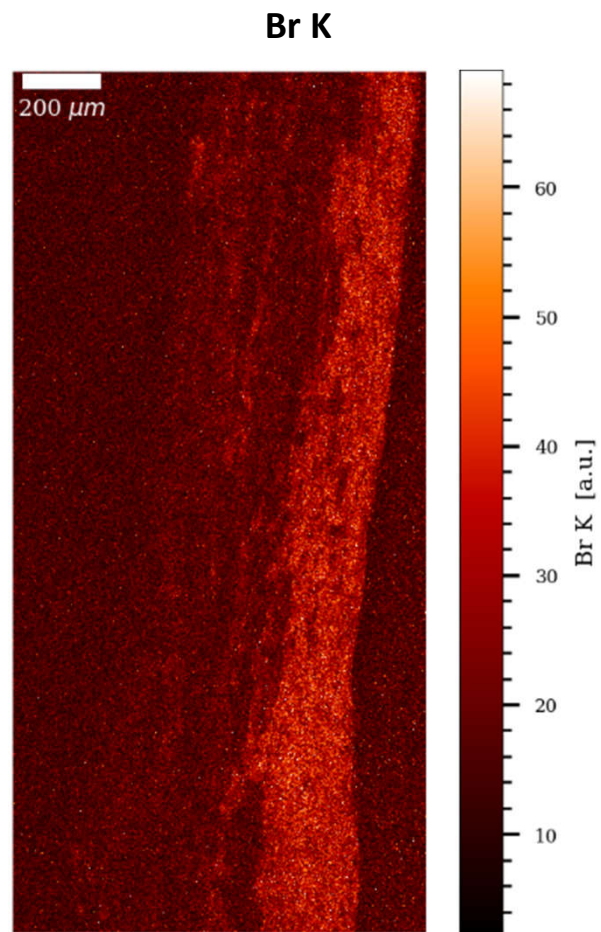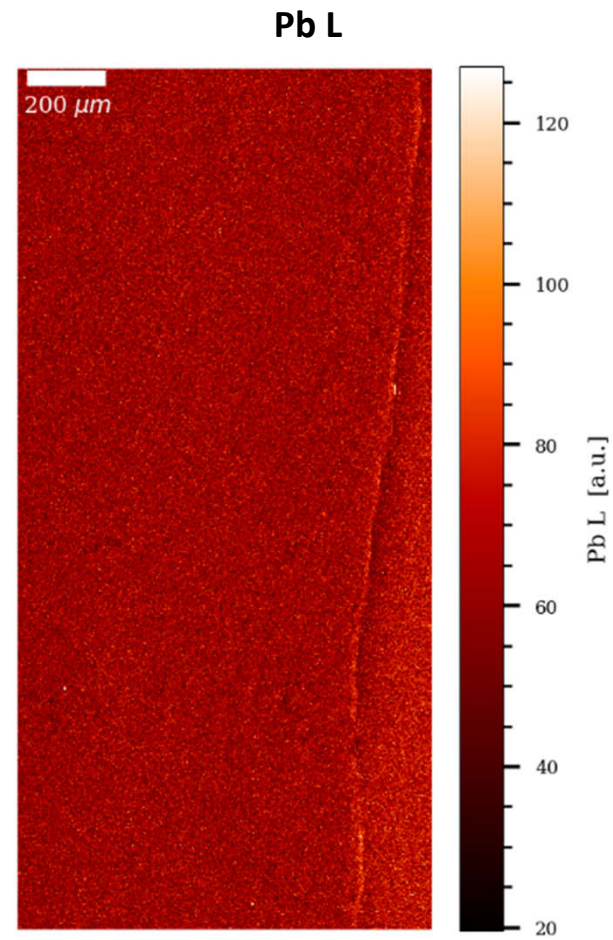



# Næstved – 211 LRM1

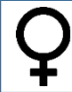

40-45 yrs. 1184 – 1266 cal. CE

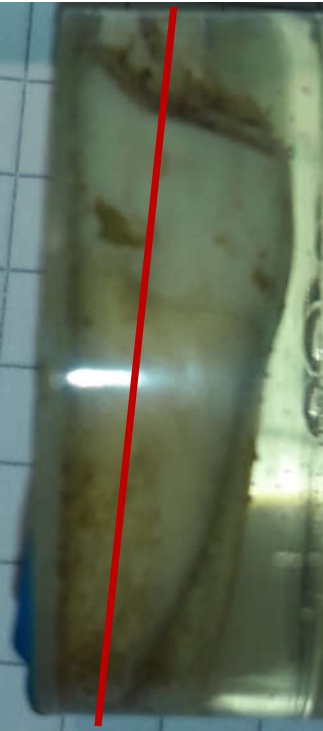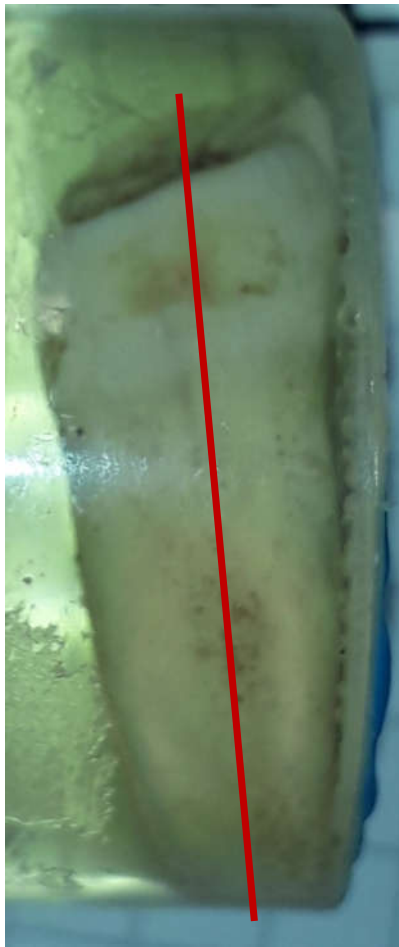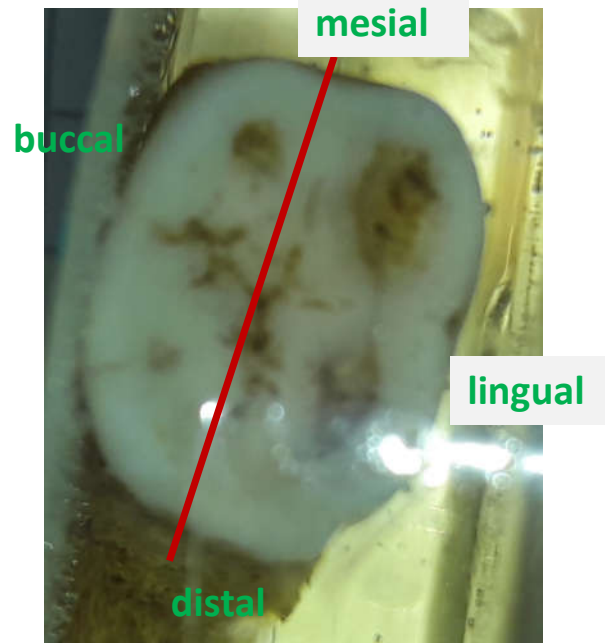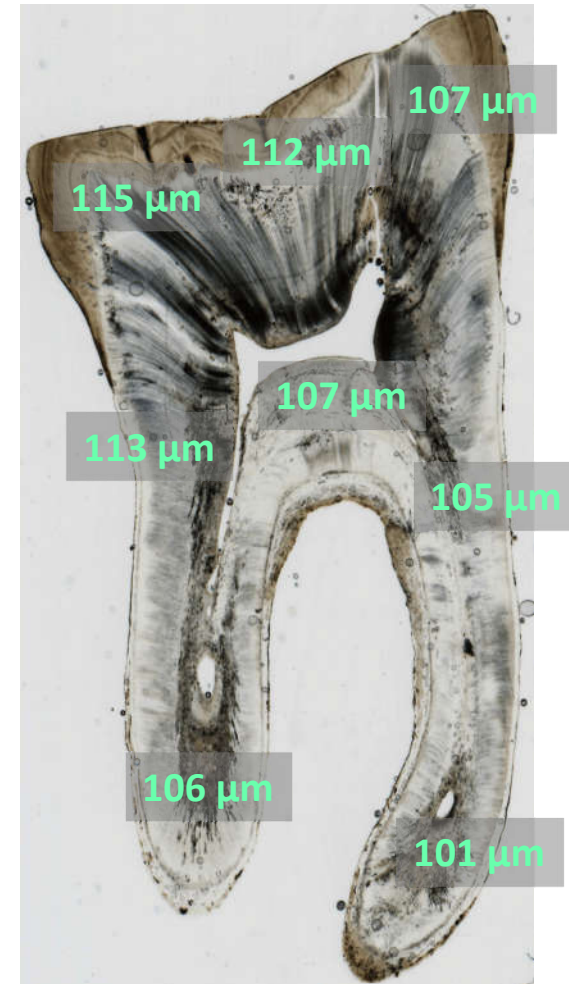

Average tooth section thickness ( $\mu\text{m}$ ): 108.3

Overview at 10  $\mu\text{m}$

High resolution at 1.5  $\mu\text{m}$  in  
acellular cementum

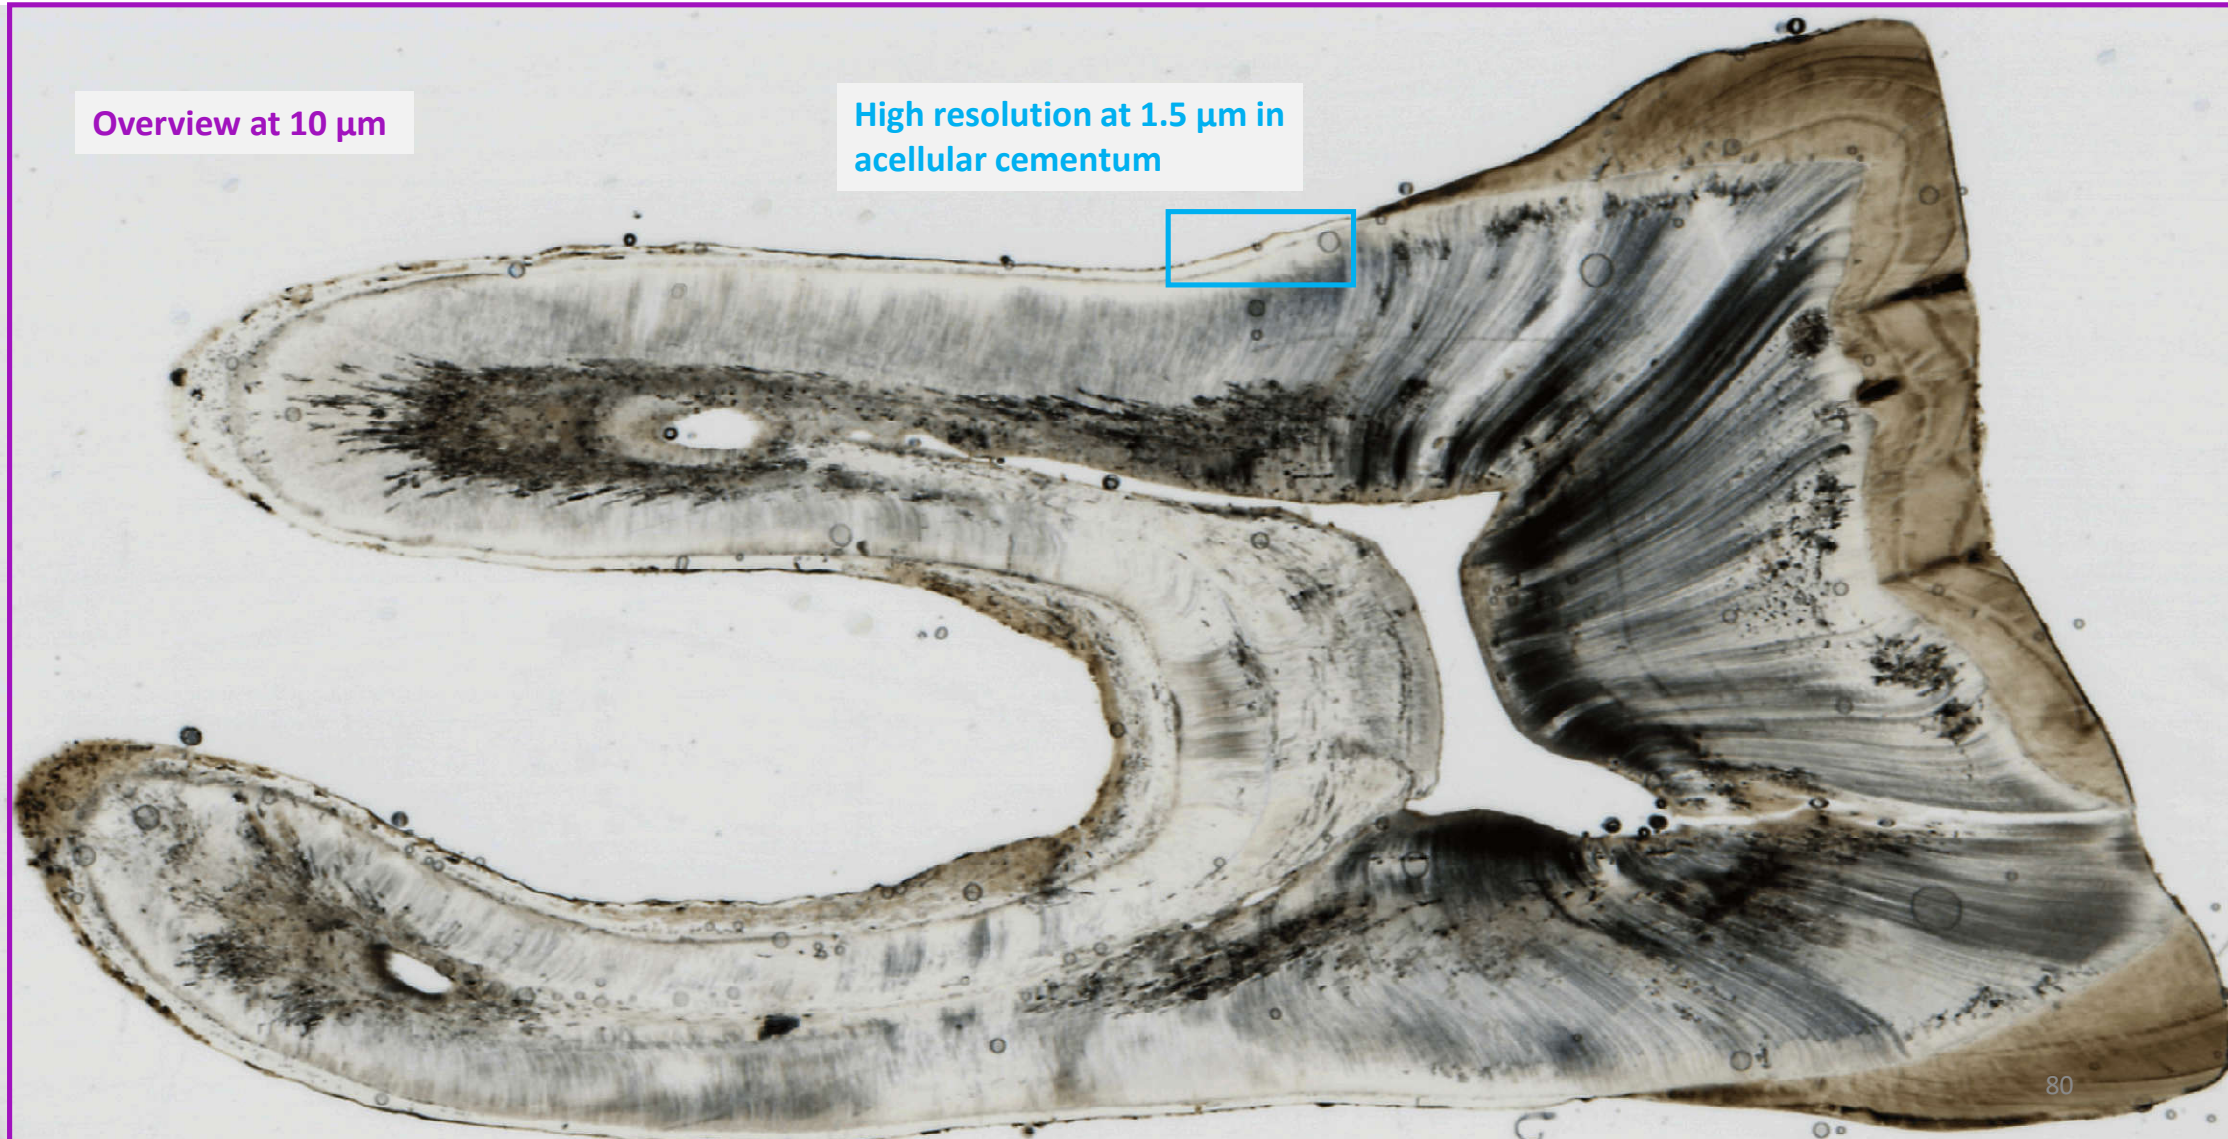



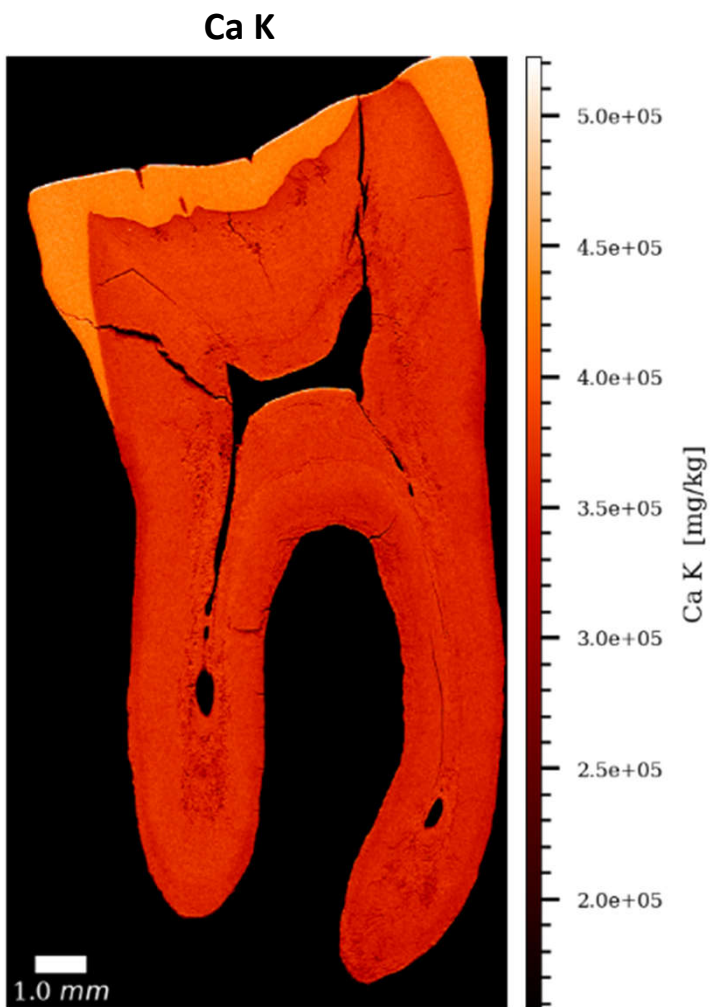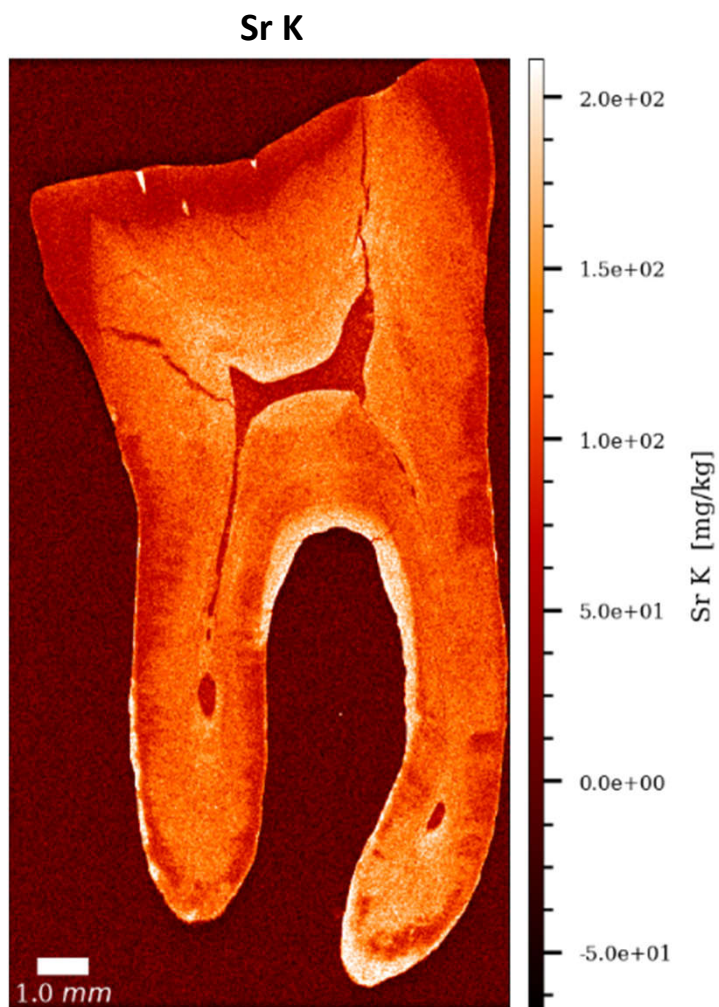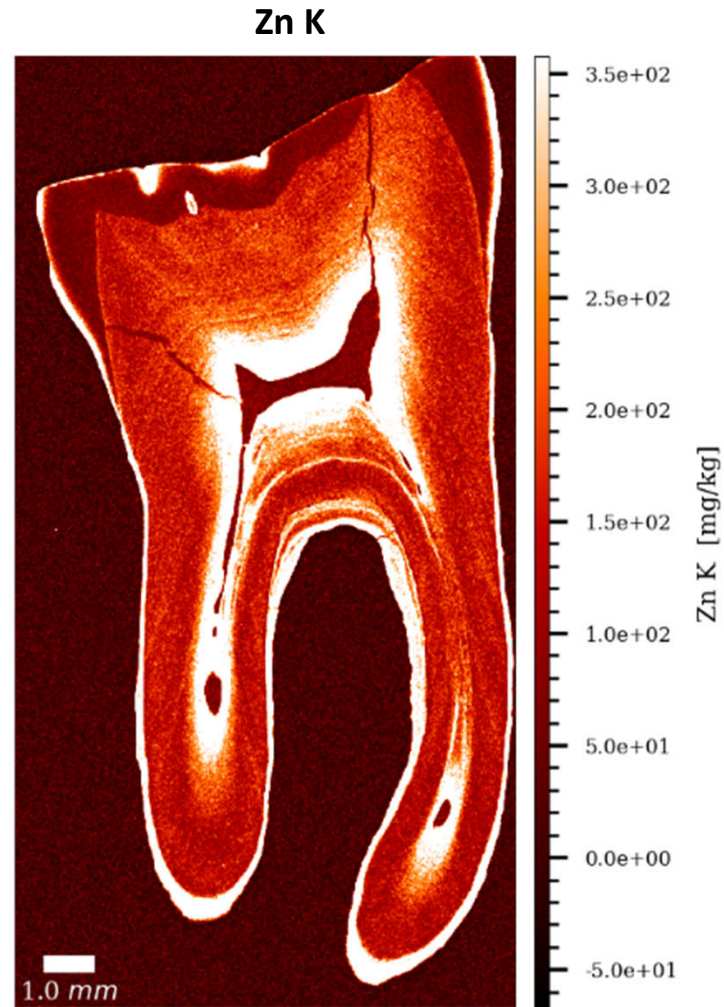

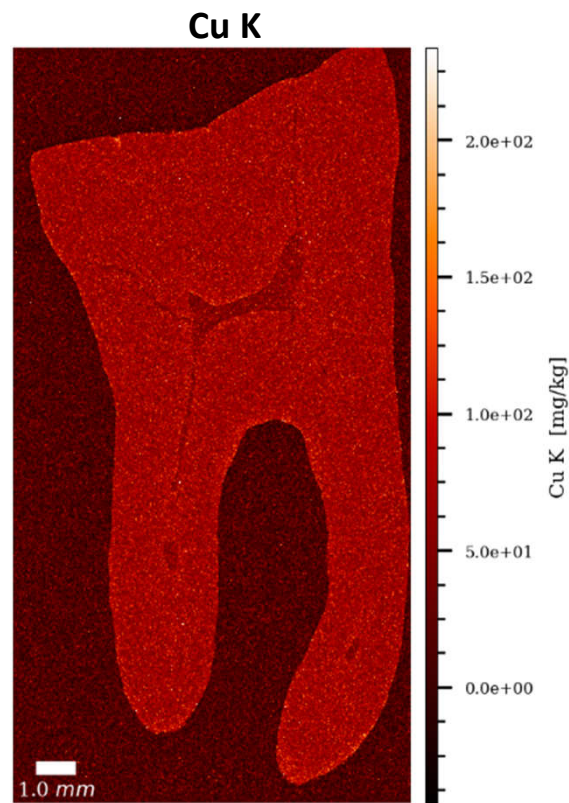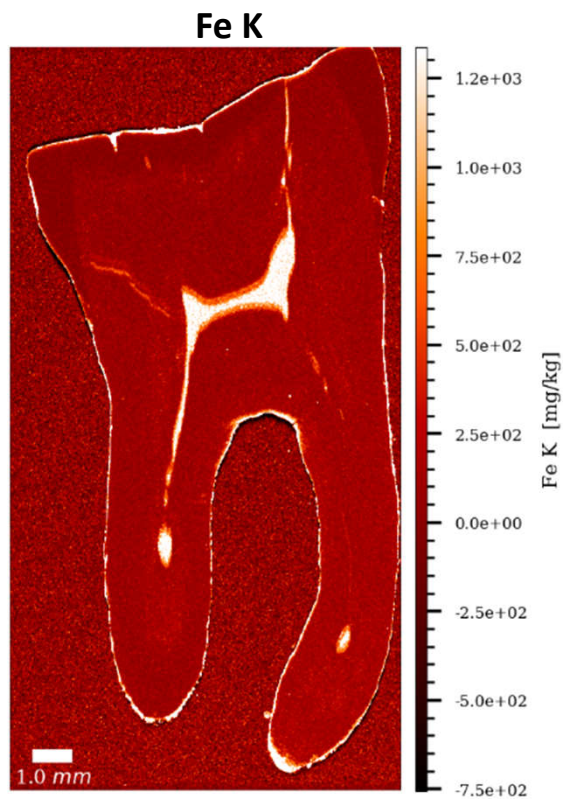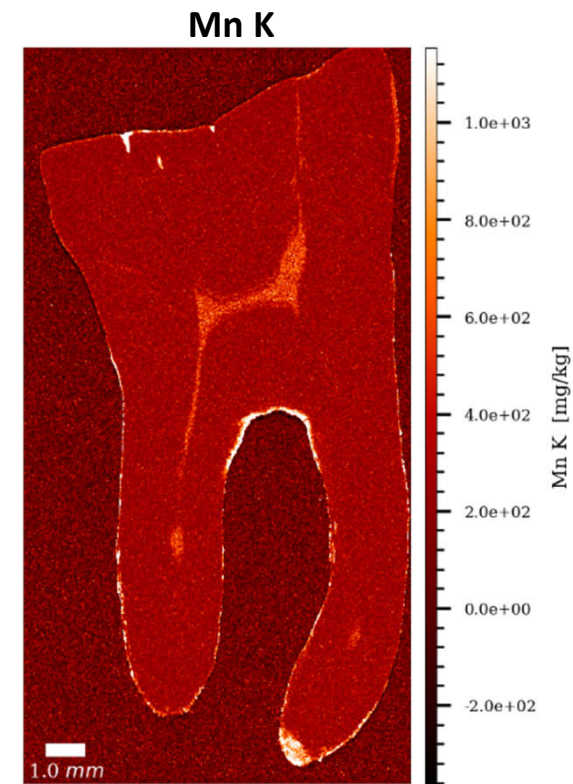



Uncalibrated data  
(arbitrary units)

Gauss (1x1)

Br K

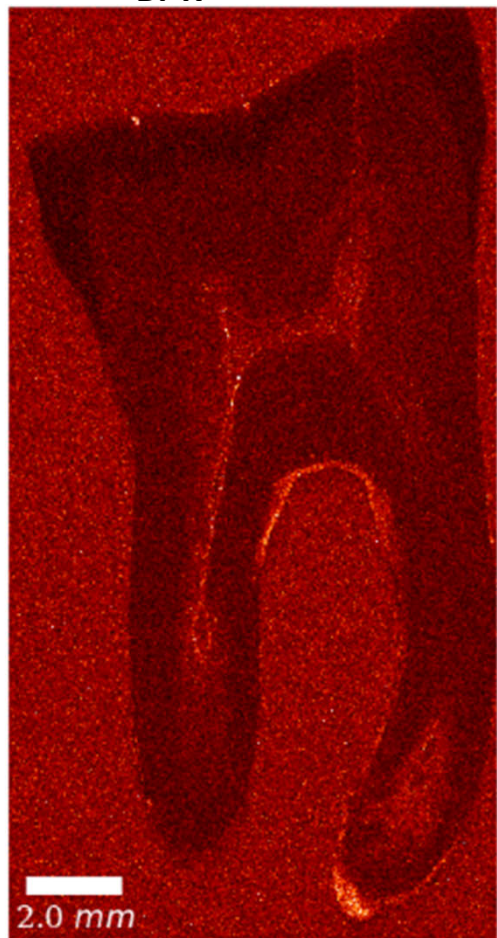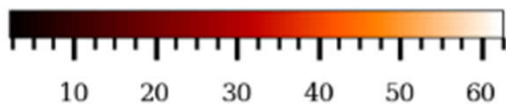

Br K [a.u.]

Pb L

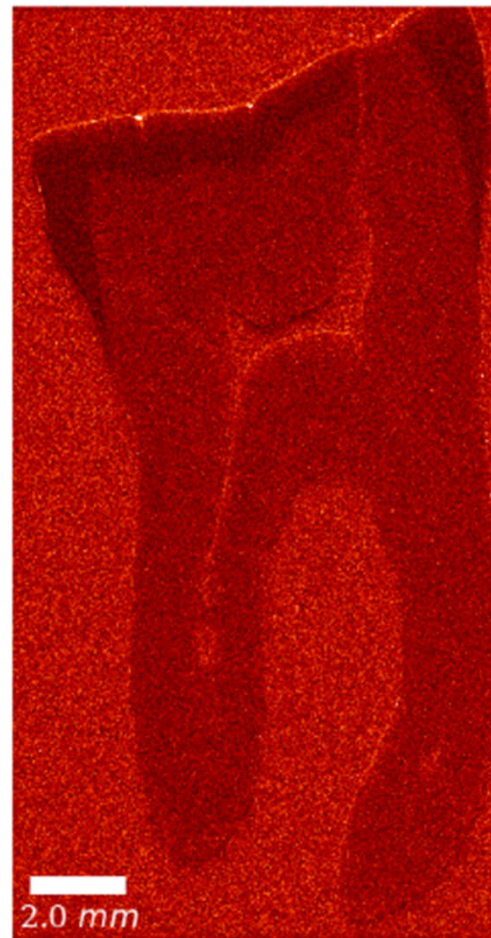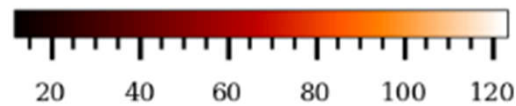

Pb L [a.u.]

Næstved 211 LRM1

High resolution at 1.5  $\mu\text{m}$

Gauss (1x1)

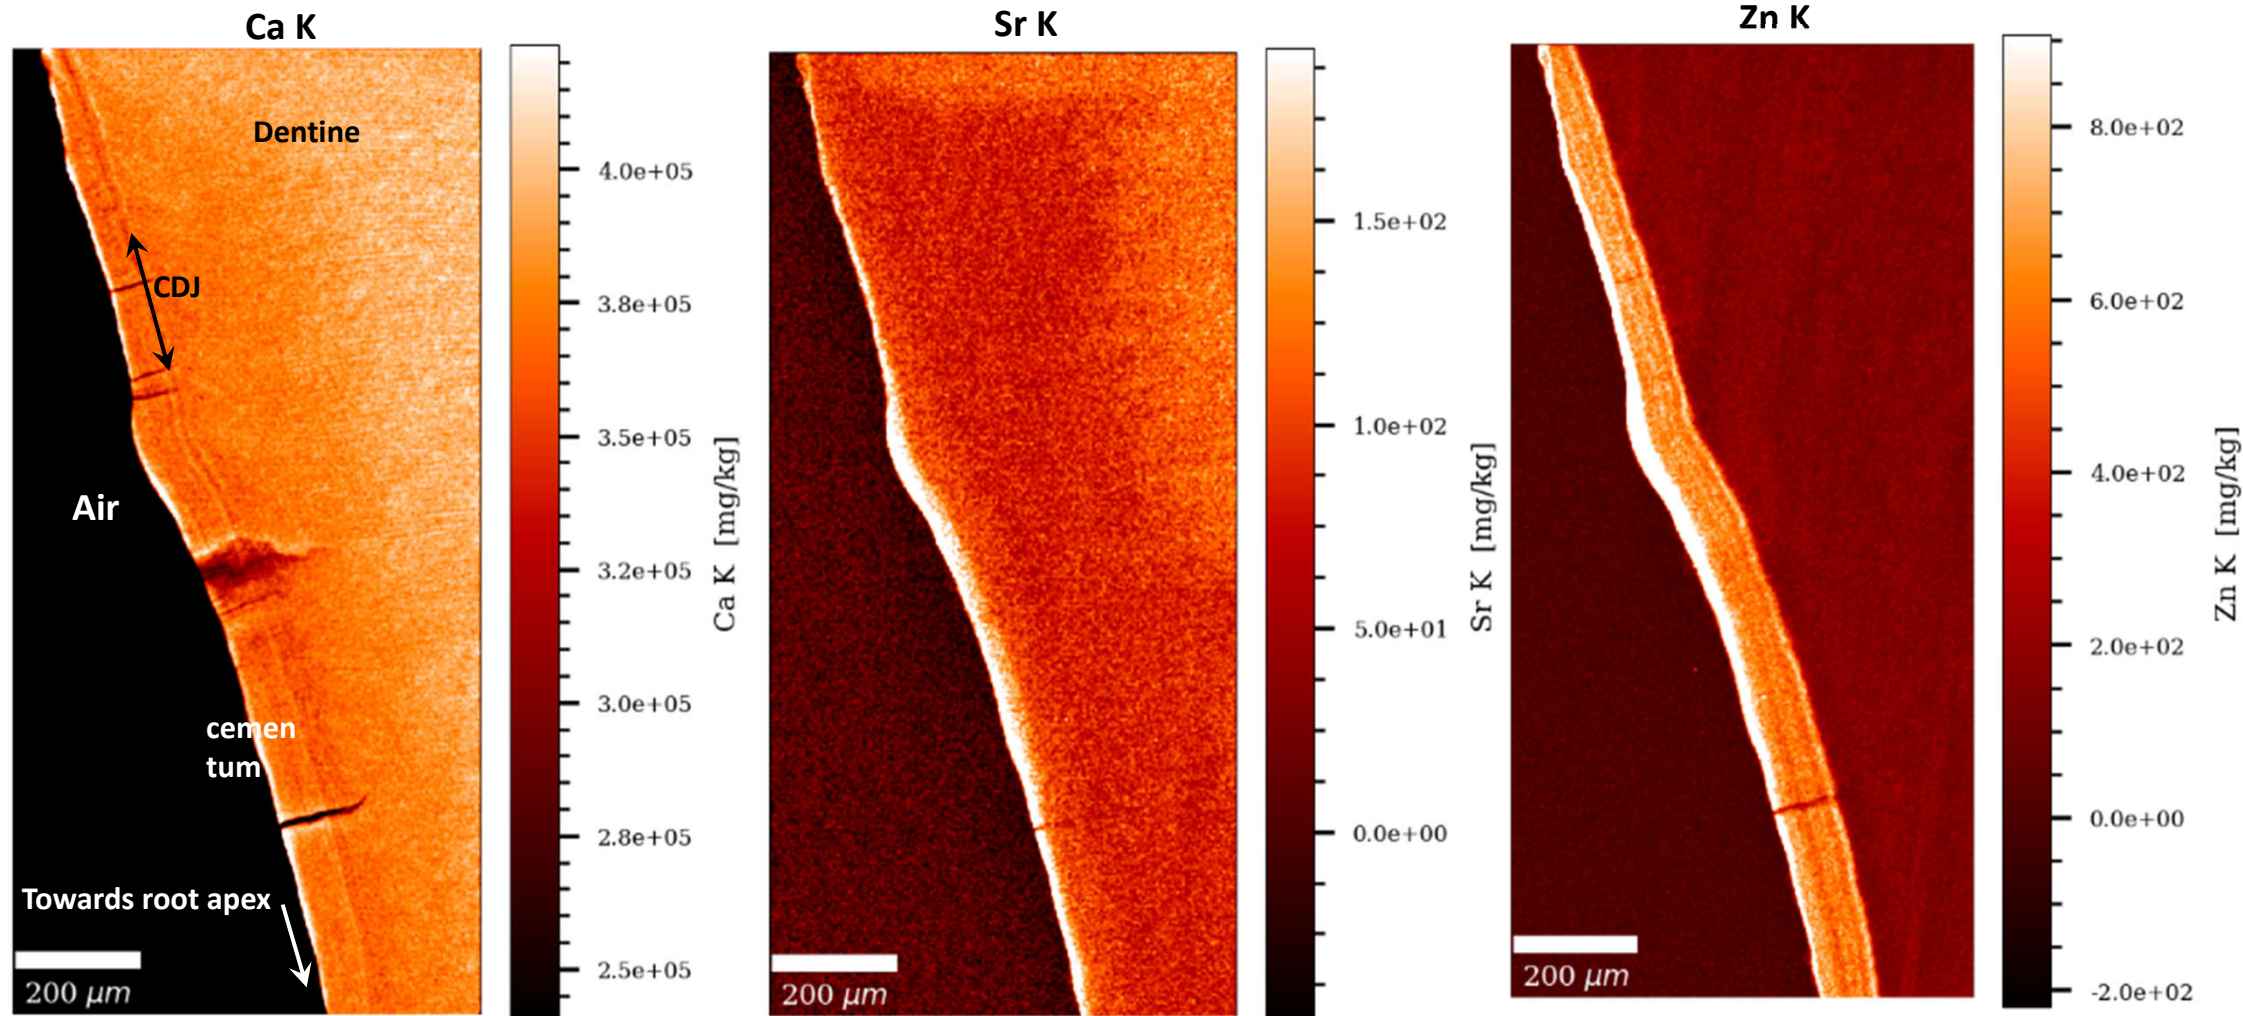



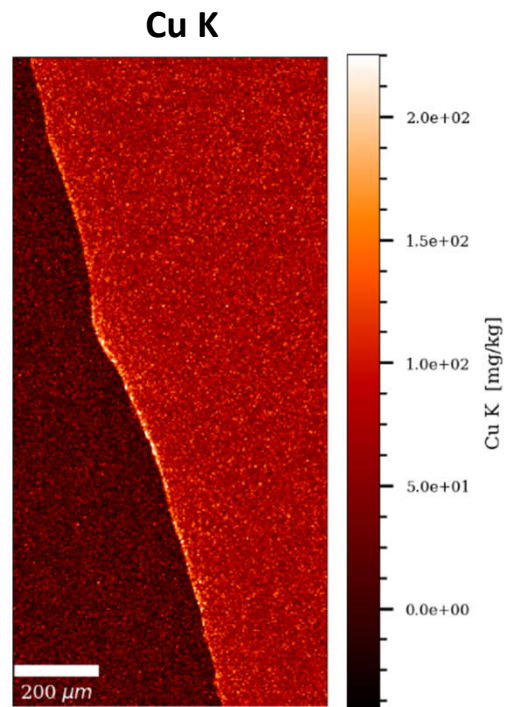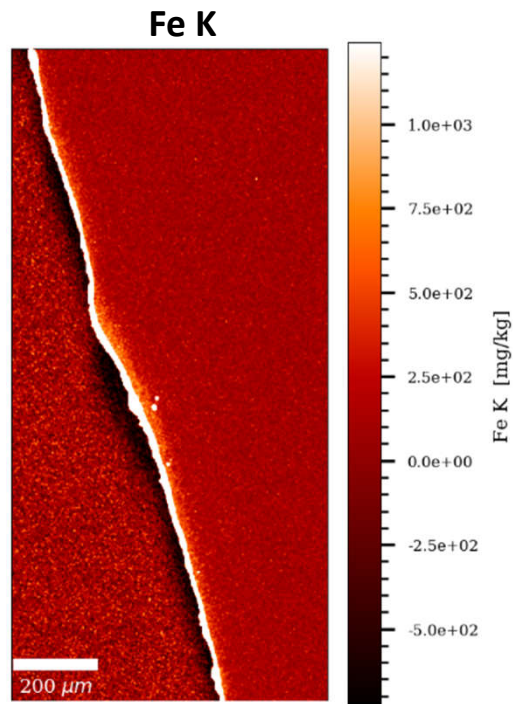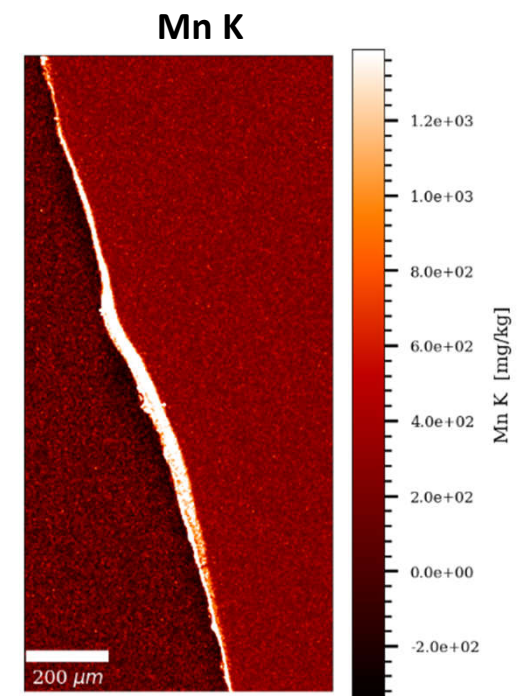

# Næstved – 268 LLM1

♂ 30-40 yrs. 1441 – 1522 cal. CE

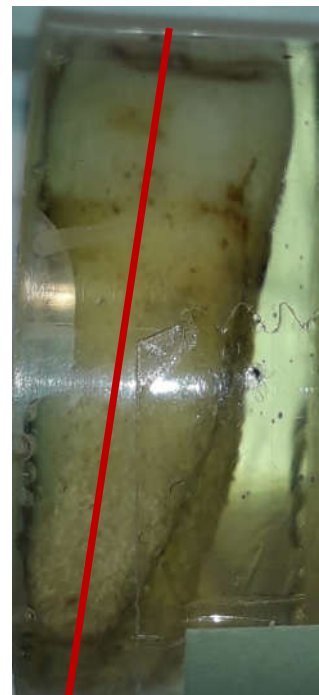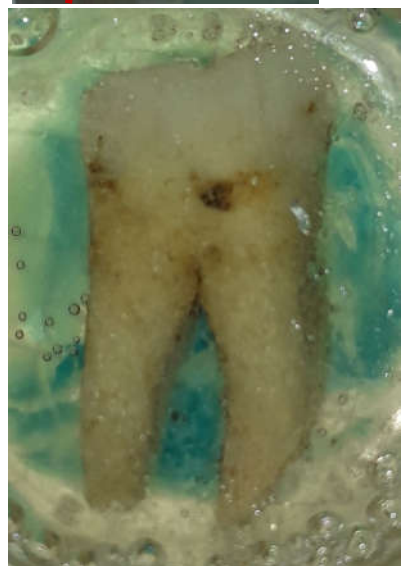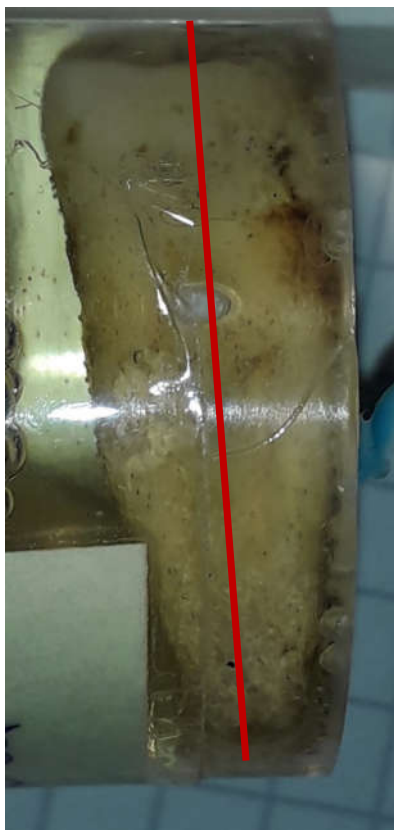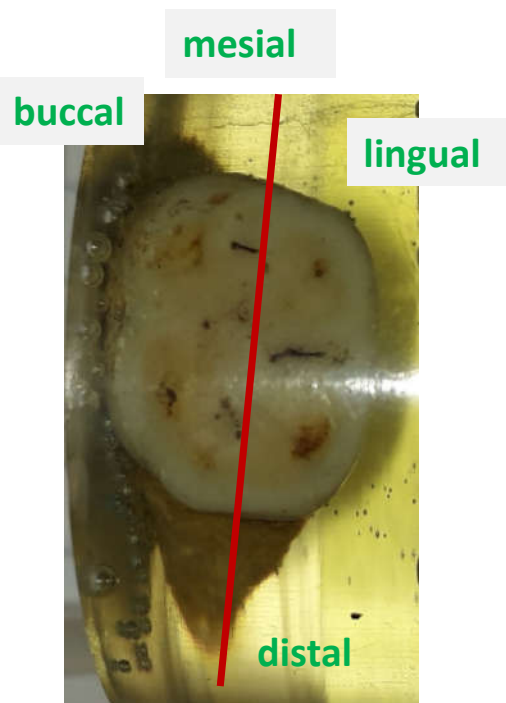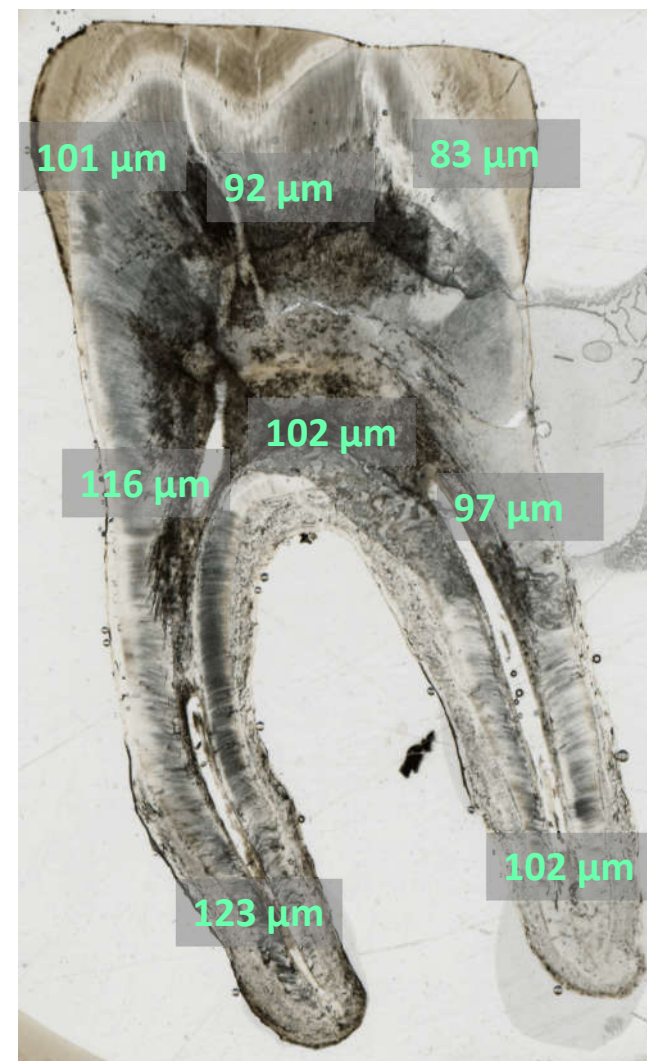

Average tooth section thickness ( $\mu\text{m}$ ): 102.0<sup>86</sup>



Næstved 268 LLM1

Scanning

Overview at 10  $\mu\text{m}$

High resolution at 1.5  $\mu\text{m}$  in cellular cementum

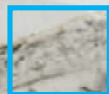

Næstved 268 LLM1

Overview at 10  $\mu\text{m}$

Gauss (1.2x1.2)

Ca K

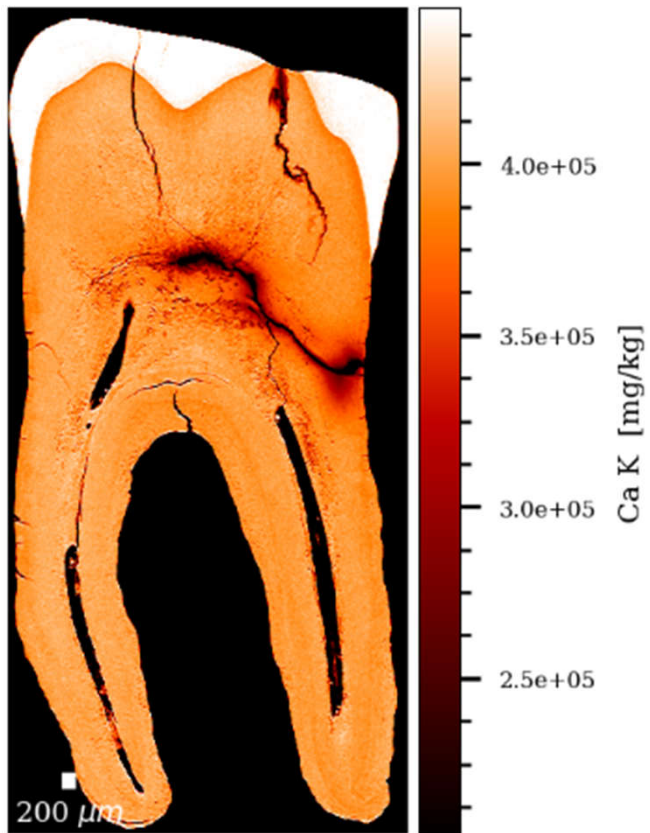

Sr K

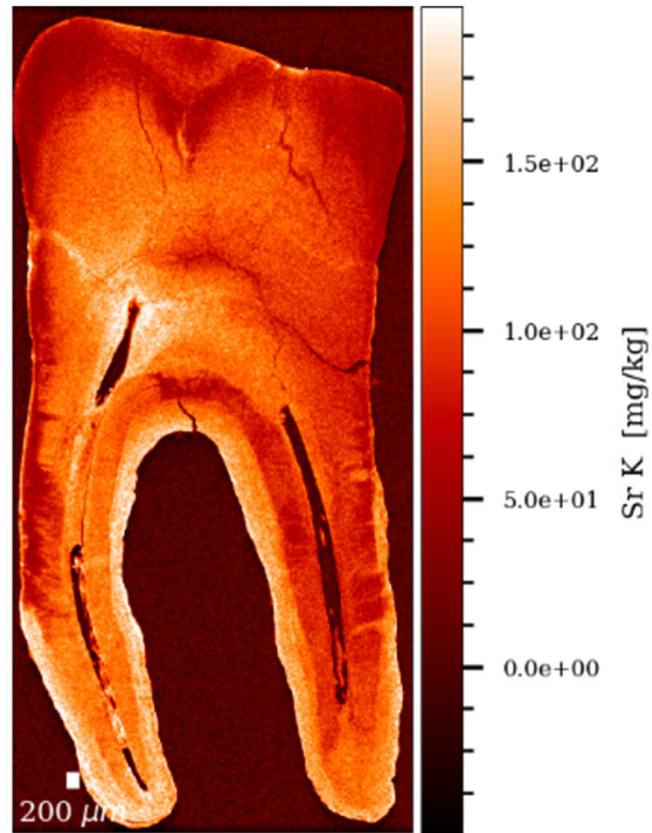

Zn K

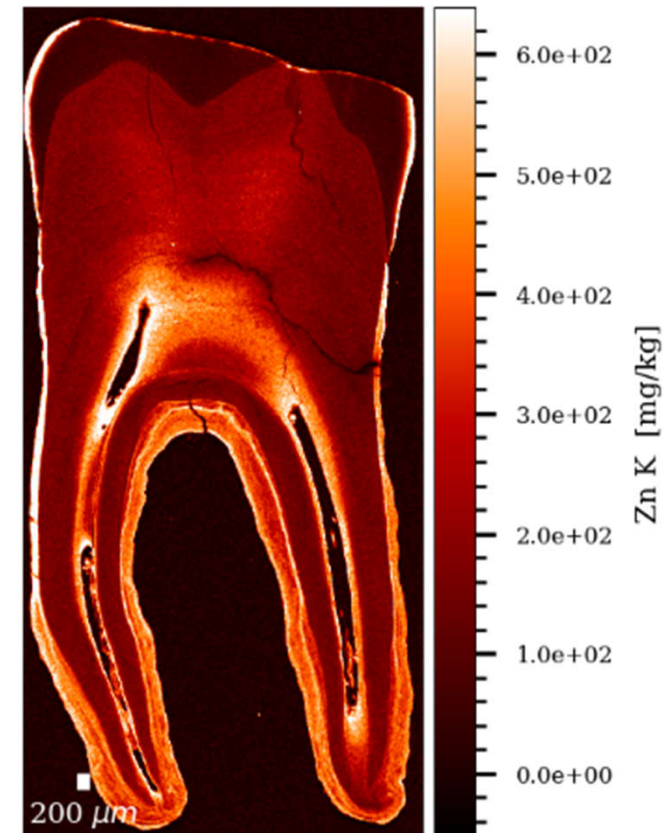



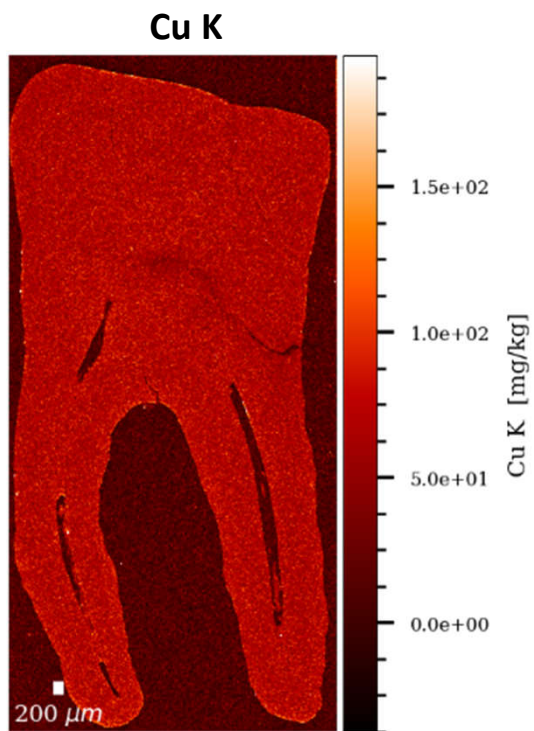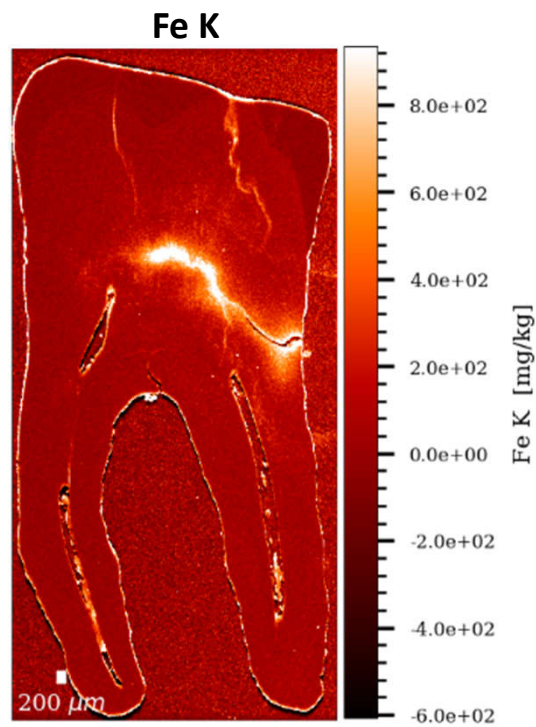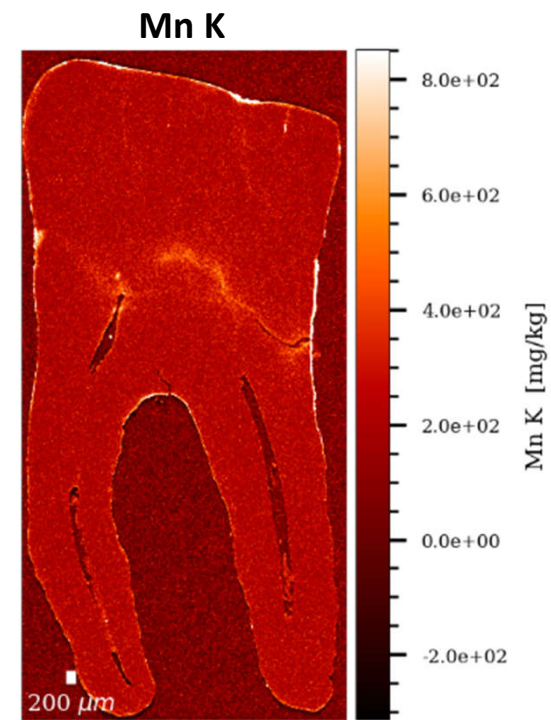

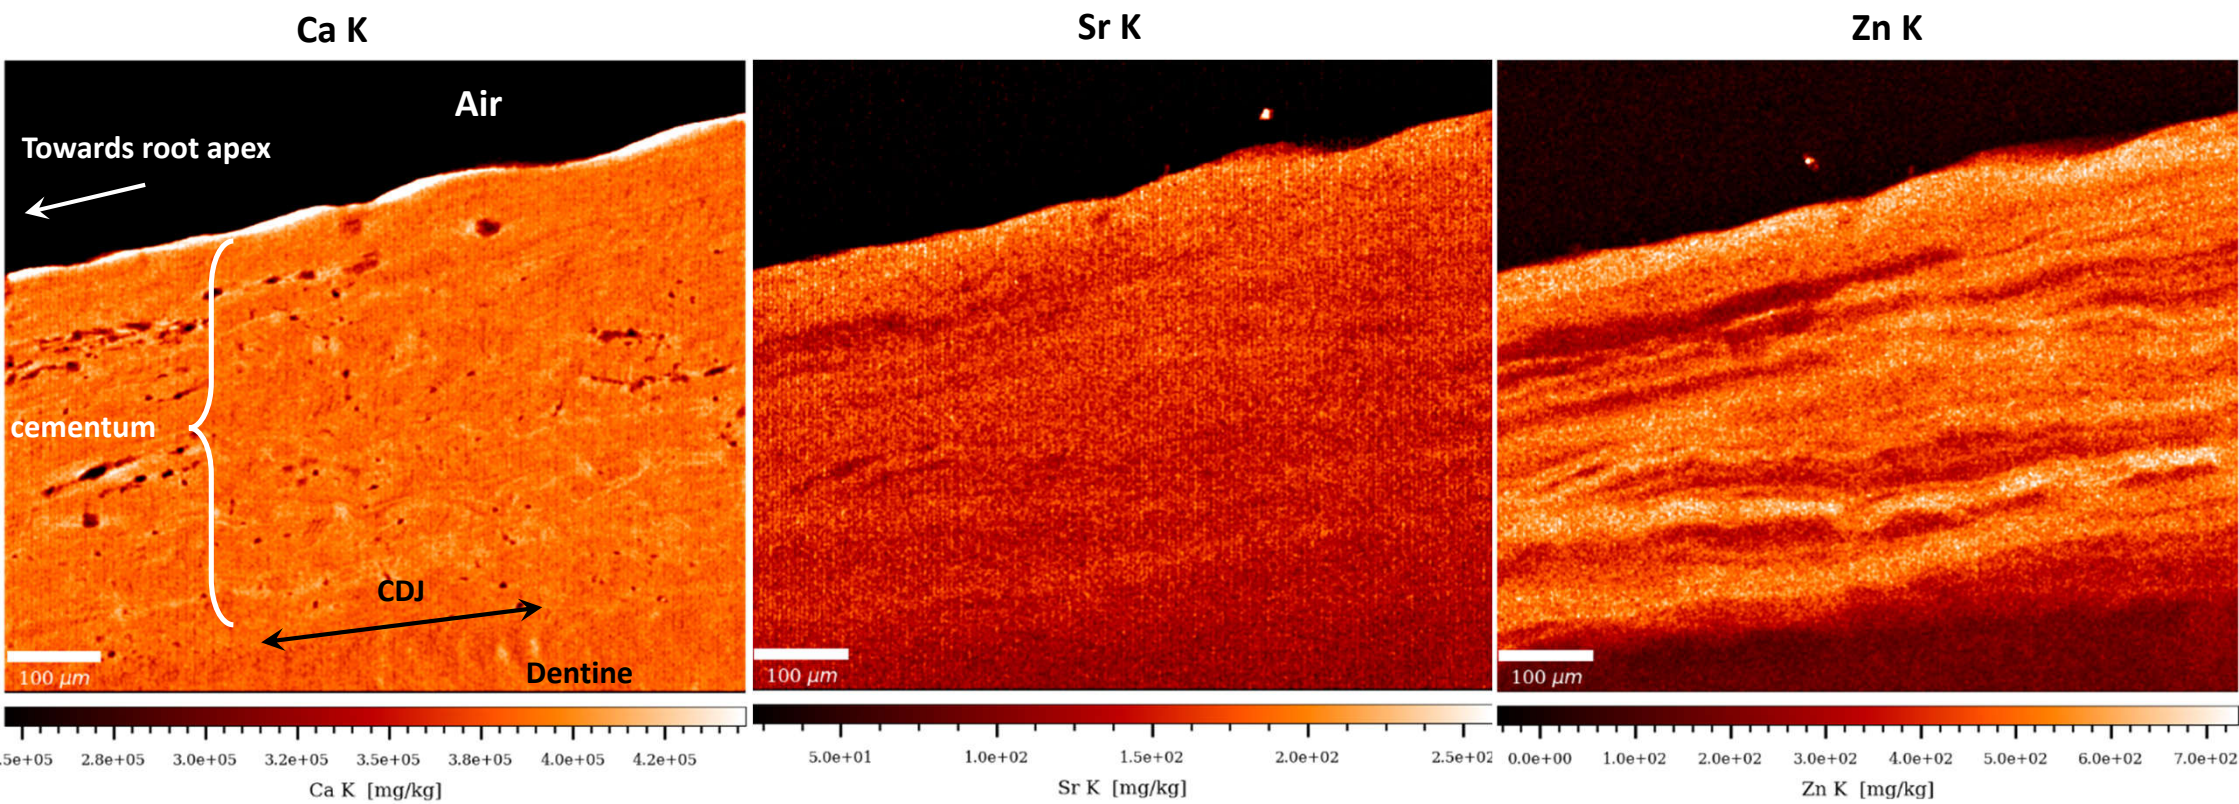



Næstved 268 LLM1

High resolution at 1  $\mu\text{m}$

Gauss (1x1)

Cu K

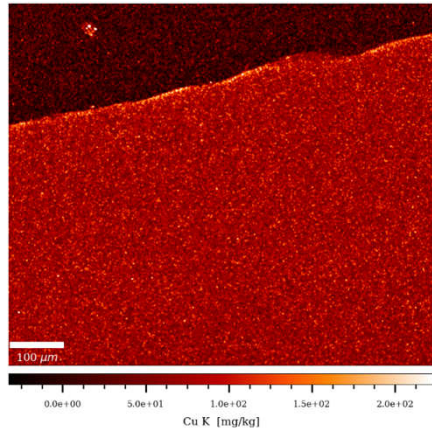

Mn K

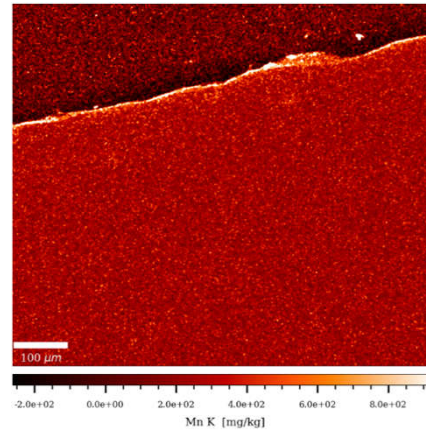

Fe K

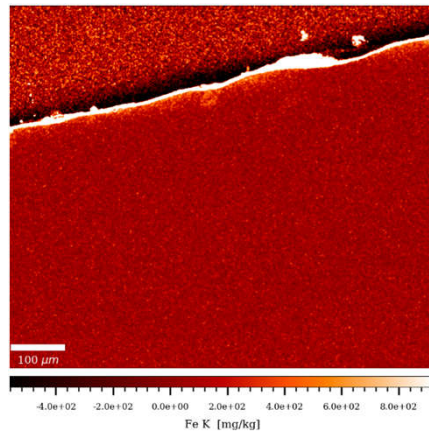

Pb L

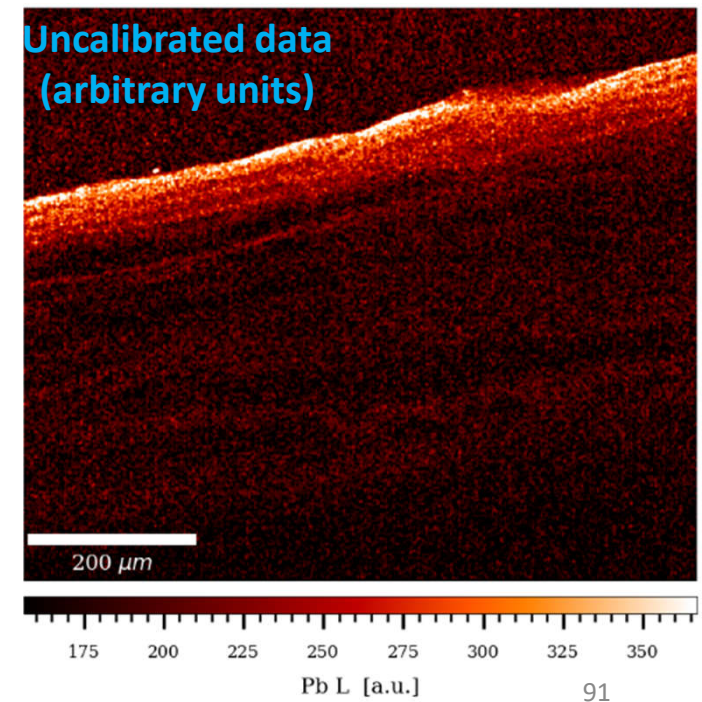

# Næstved – 305 LLC

♂ 30-35 yrs. mid-13<sup>th</sup> – mid-16<sup>th</sup> c. CE

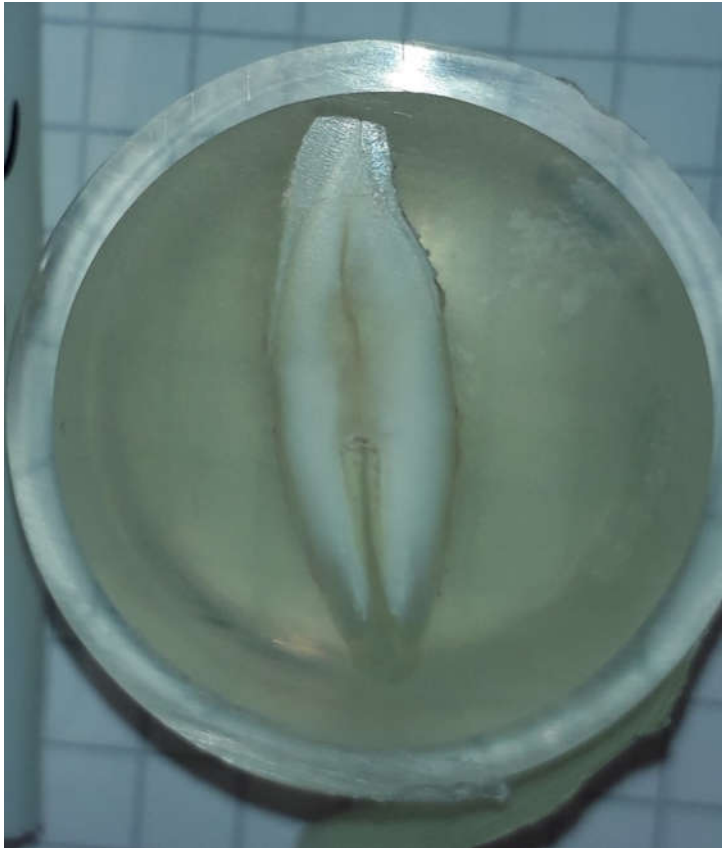

Average tooth section  
thickness ( $\mu\text{m}$ ): 119.0

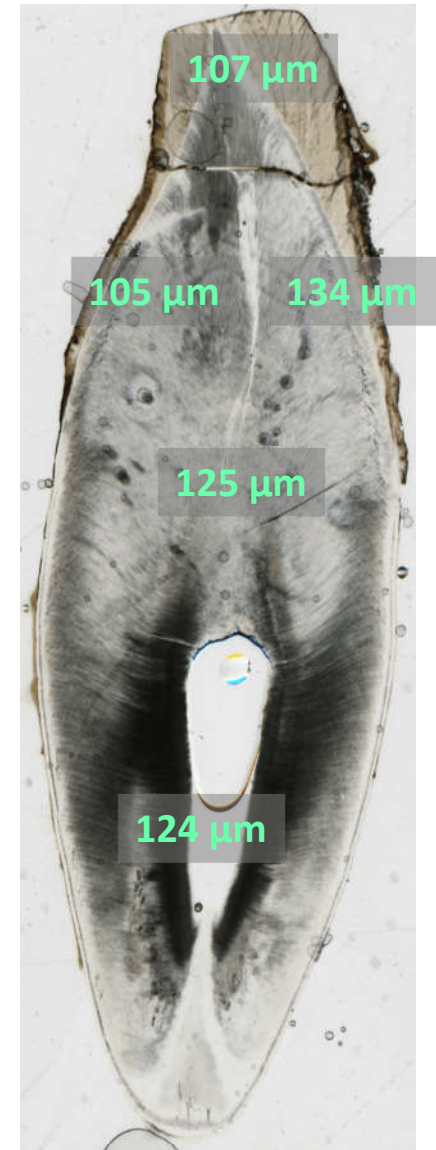



Overview at 10  $\mu\text{m}$

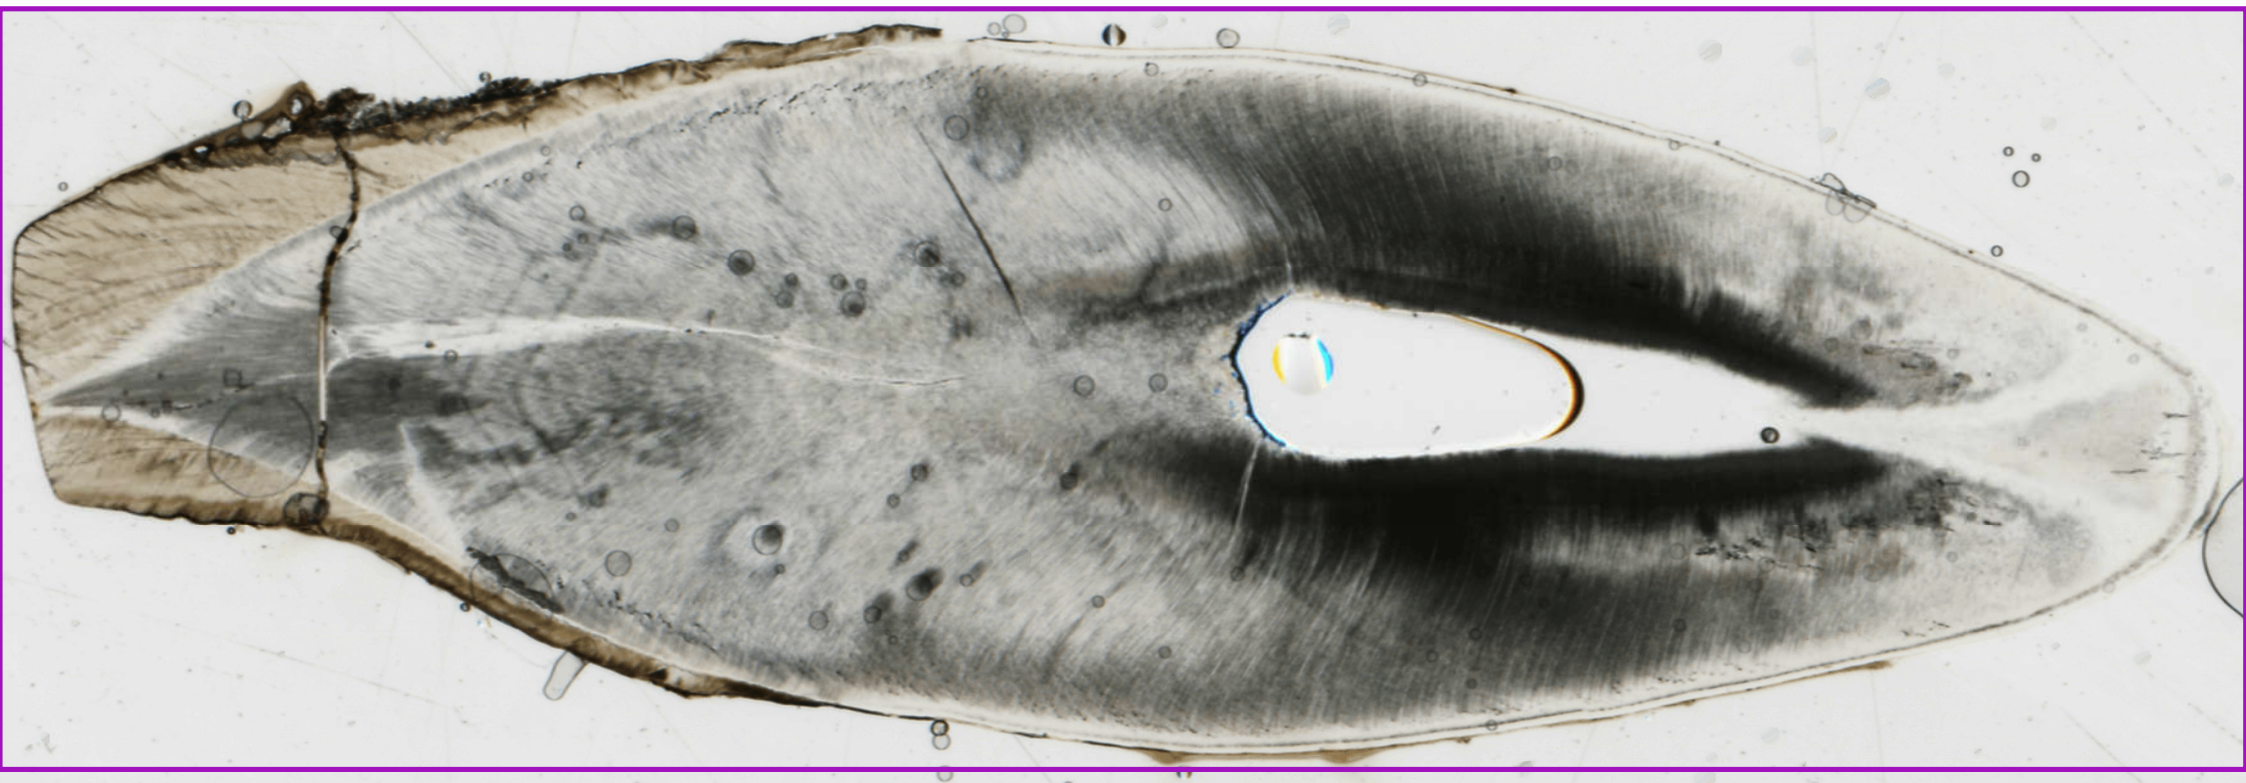

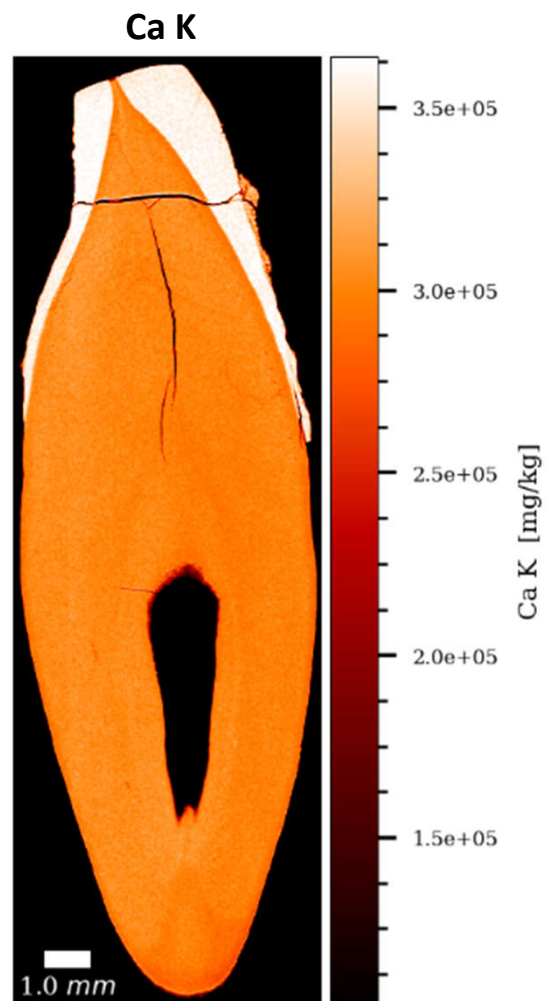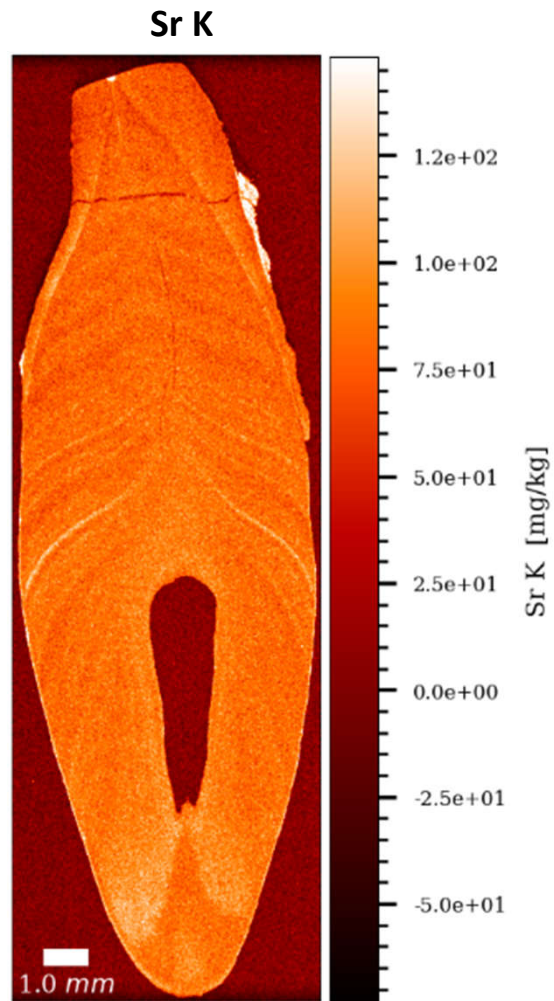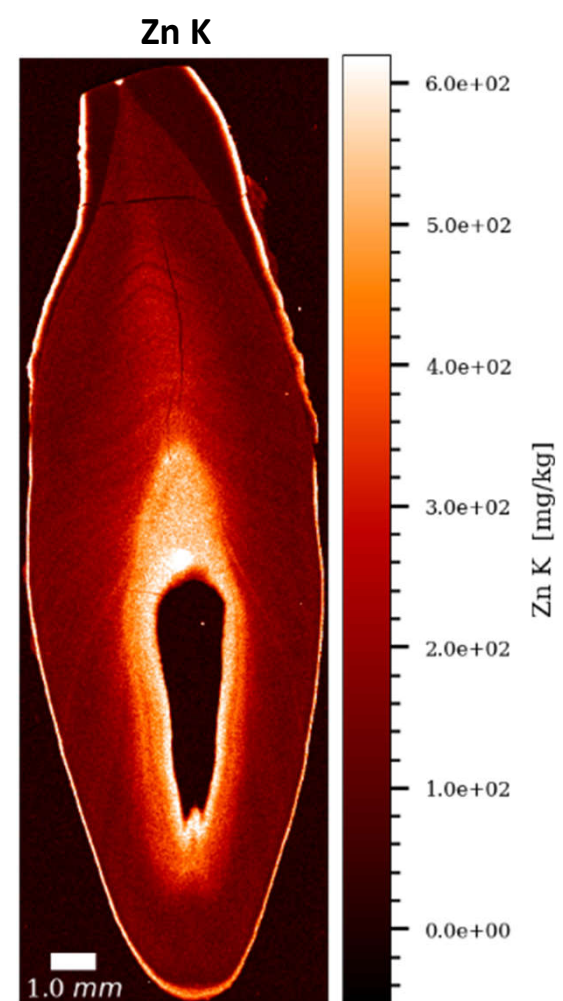



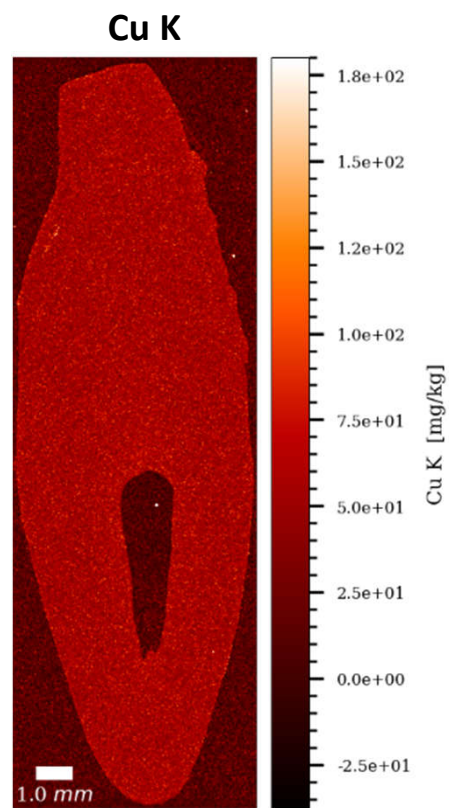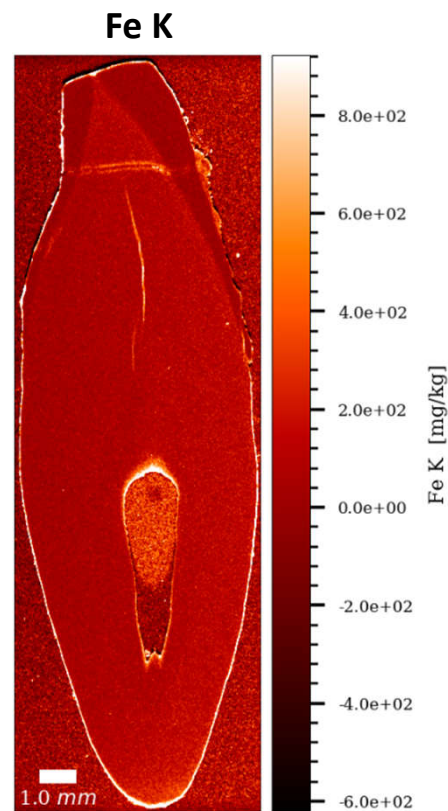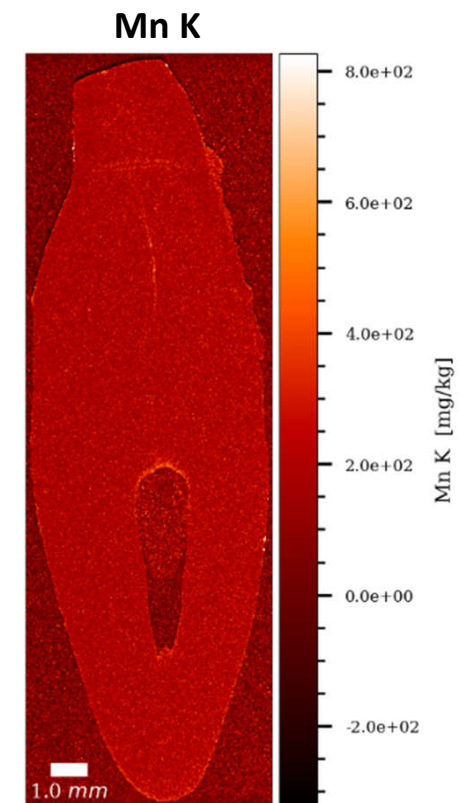

Næstved 305 LLC

Overview at 10  $\mu\text{m}$

Uncalibrated data  
(arbitrary units)

Gauss (1.2x1.2)

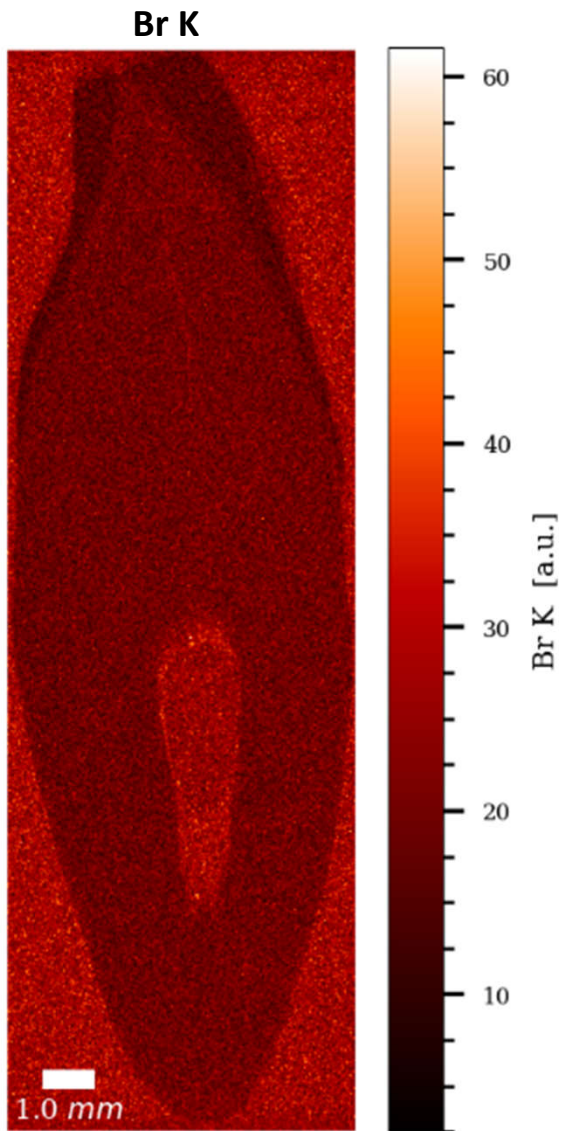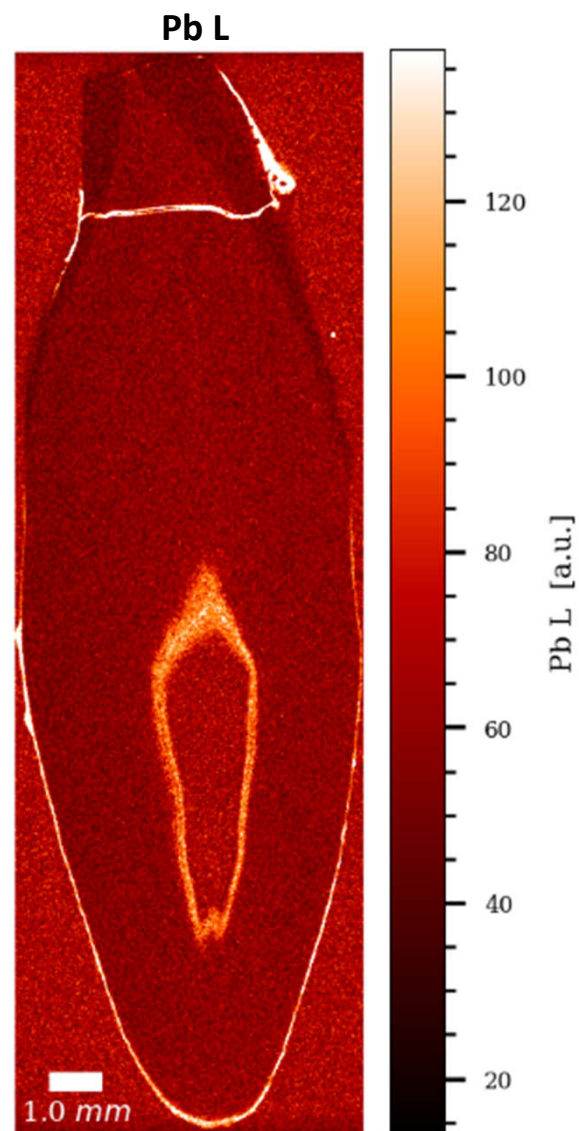



# Næstved – 305 LRM1

♂ 30-35 yrs. mid-13<sup>th</sup> – mid-16<sup>th</sup> c. CE

Mesial?

Buccal?

Lingual?

Distal?

Average tooth section thickness (µm): 117.6

133 µm

119 µm

109 µm

119 µm

128 µm

112 µm

106 µm

115 µm

Overview at 10  $\mu\text{m}$

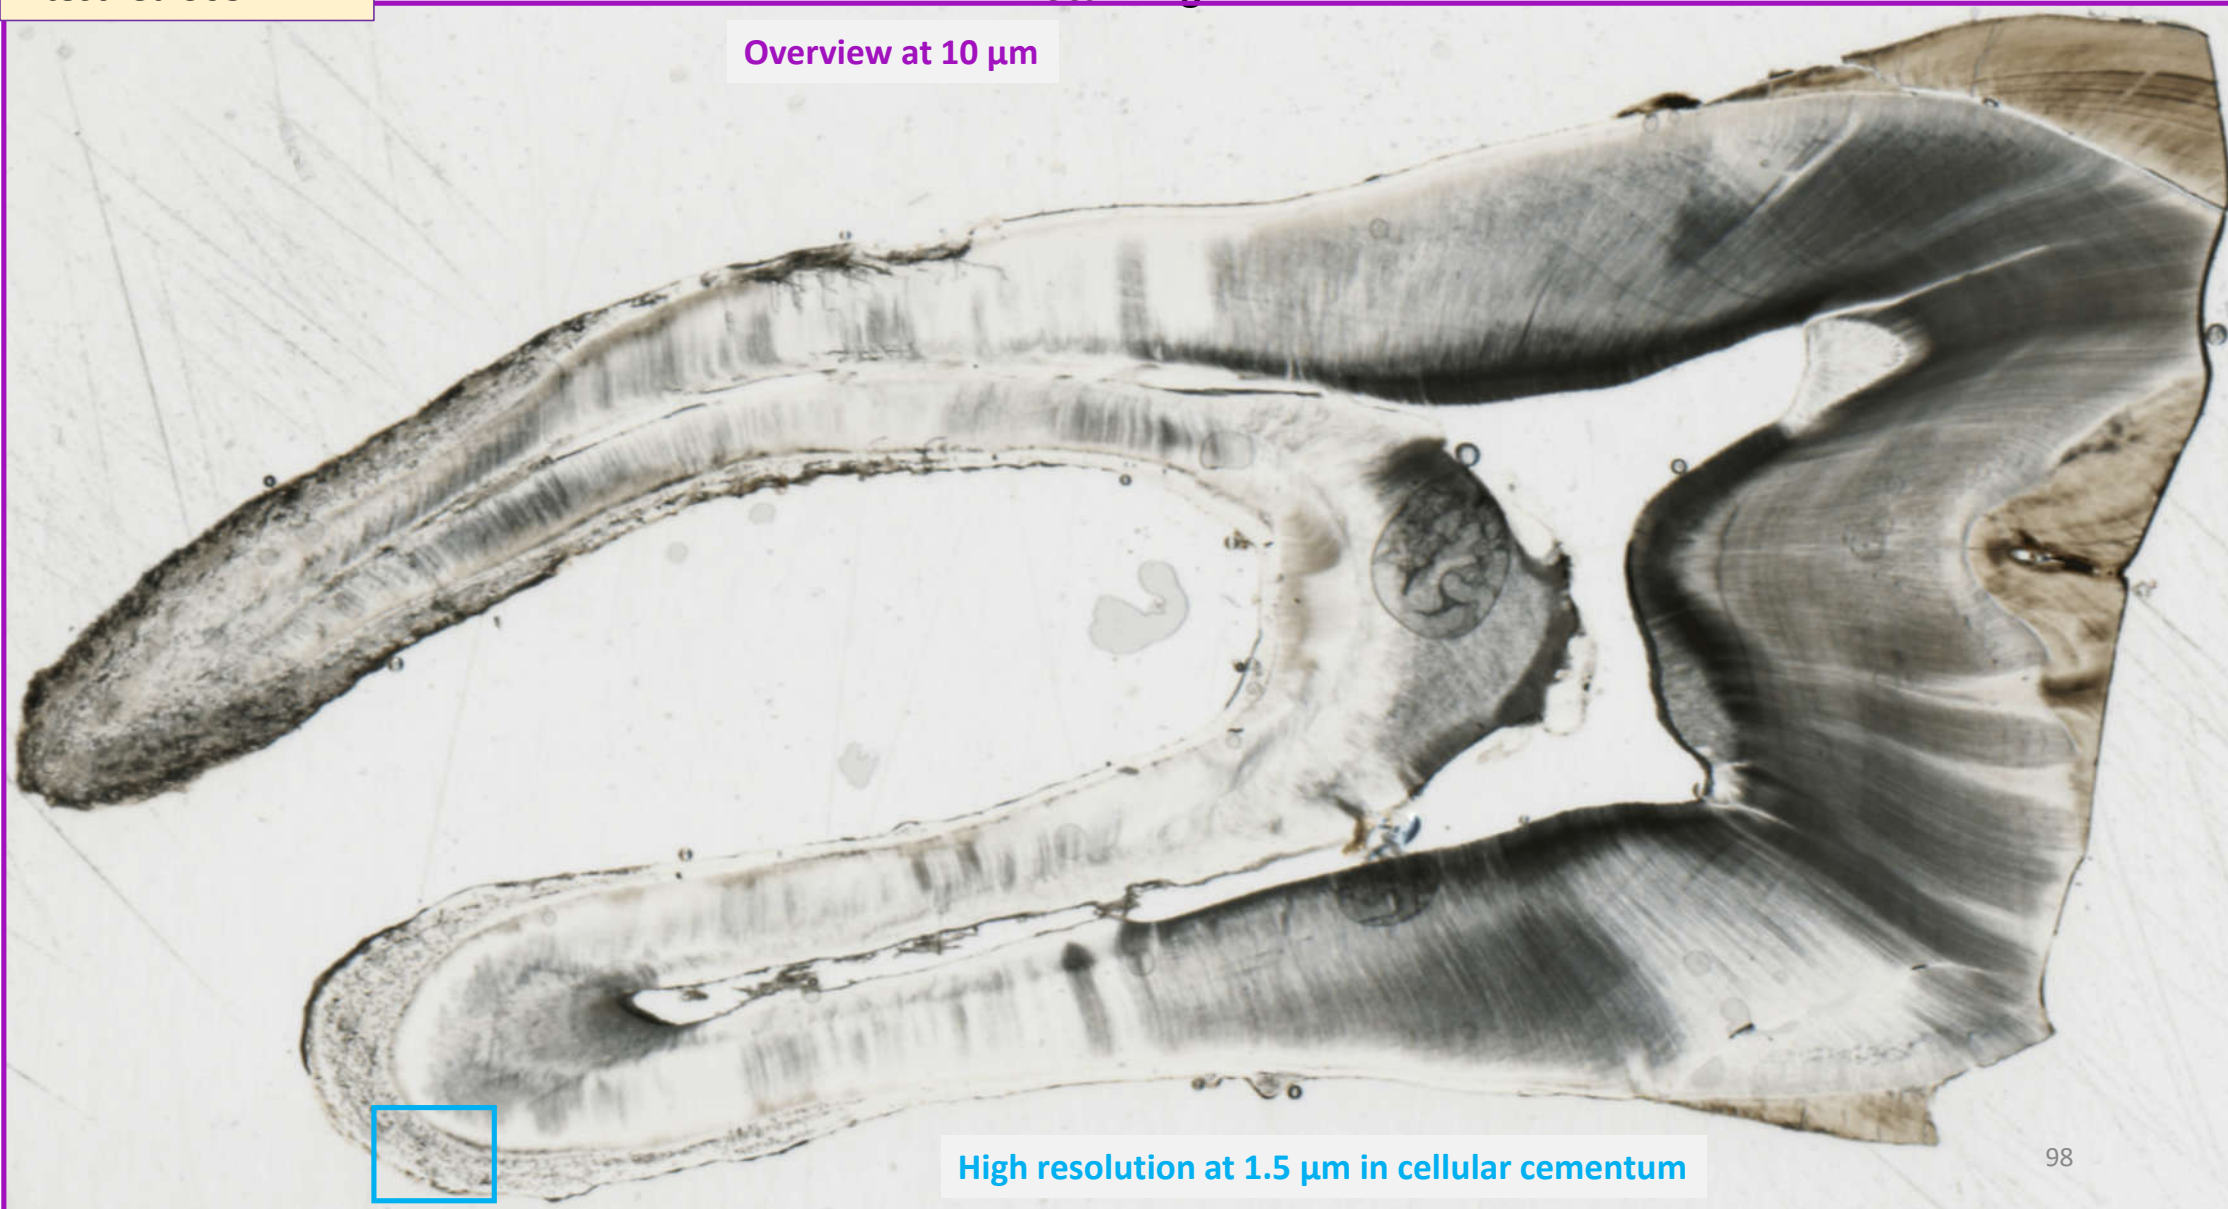

High resolution at 1.5  $\mu\text{m}$  in cellular cementum



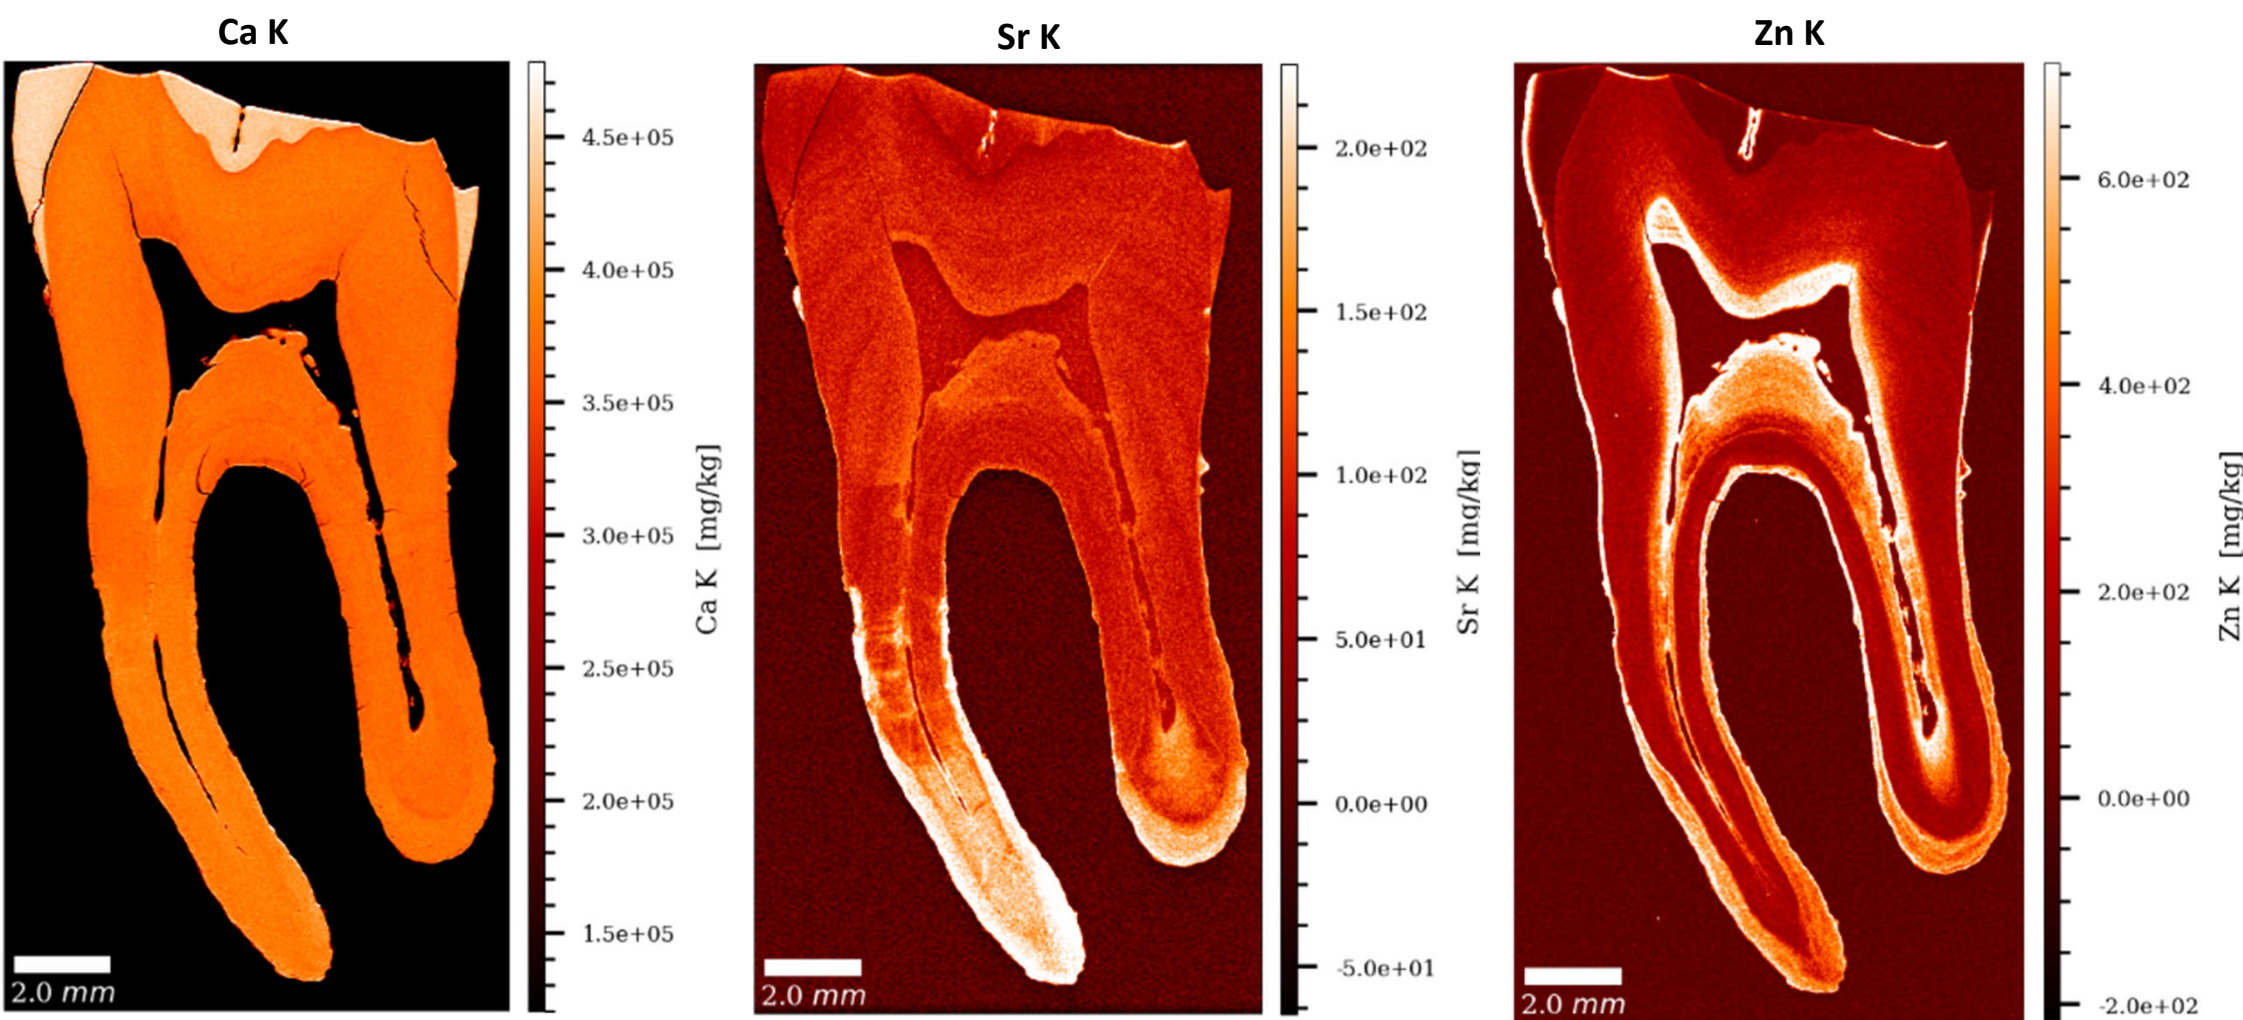

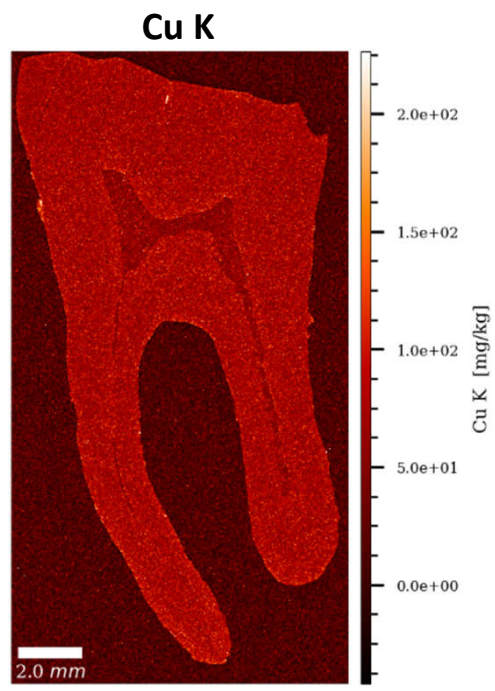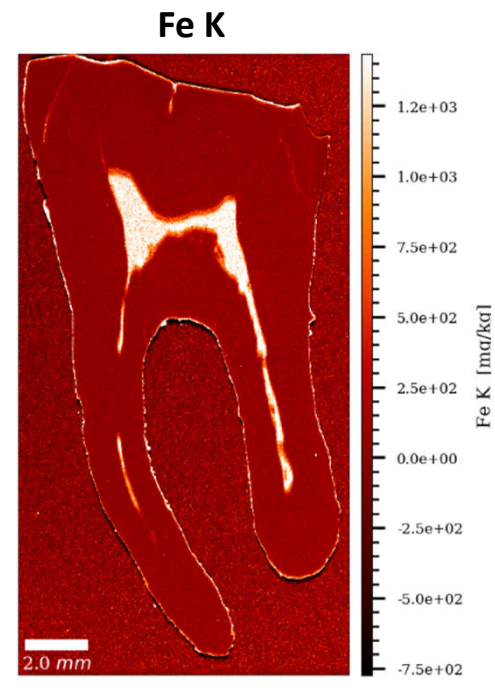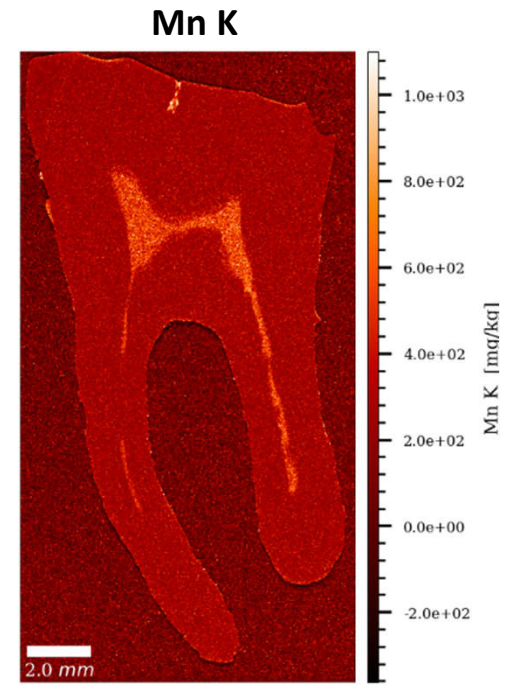



Næstved 305 LRM1

Overview at 10  $\mu\text{m}$

Uncalibrated data  
(arbitrary units)

Gauss (1x1)

Pb L

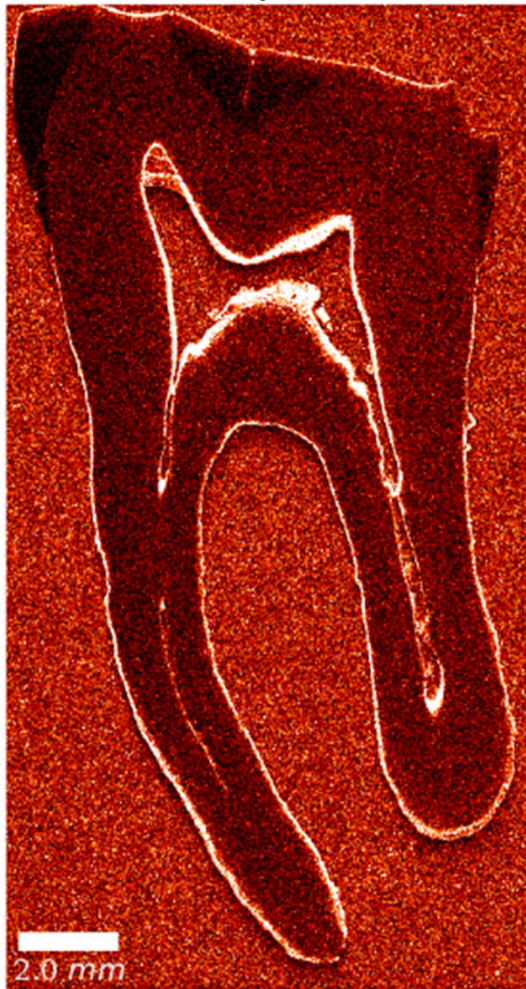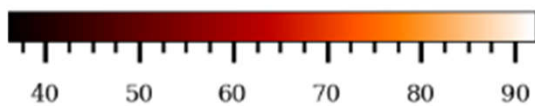

Pb L [a.u.]

Br K

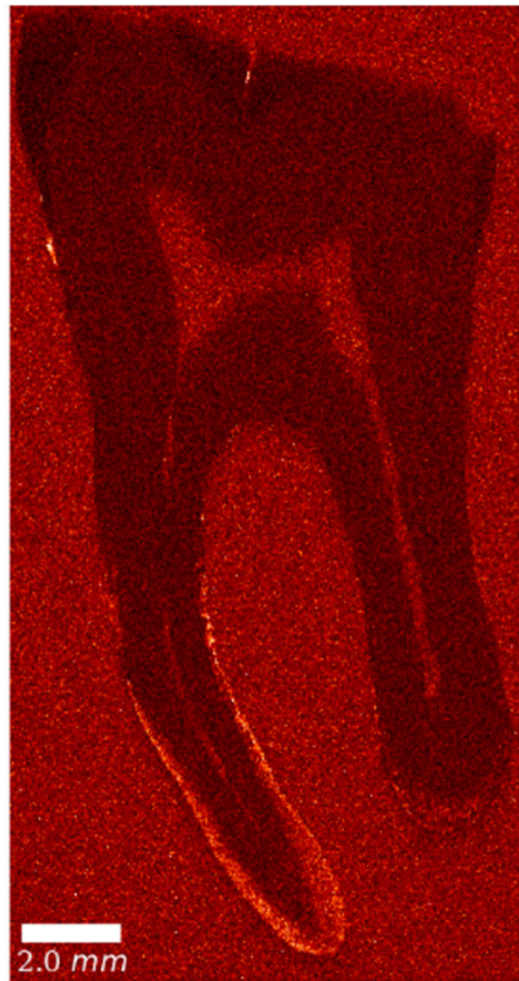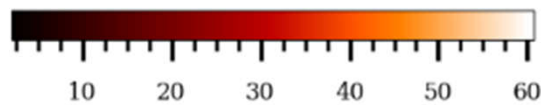

Br K [a.u.]

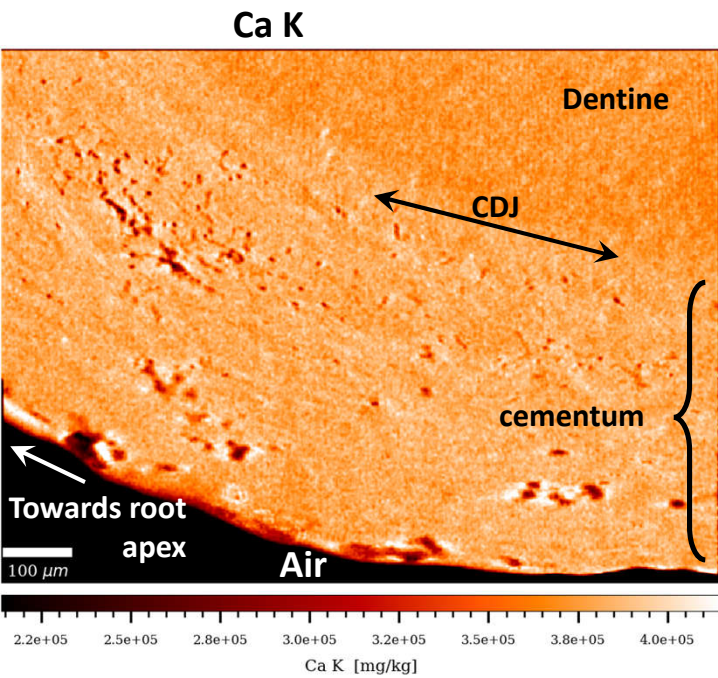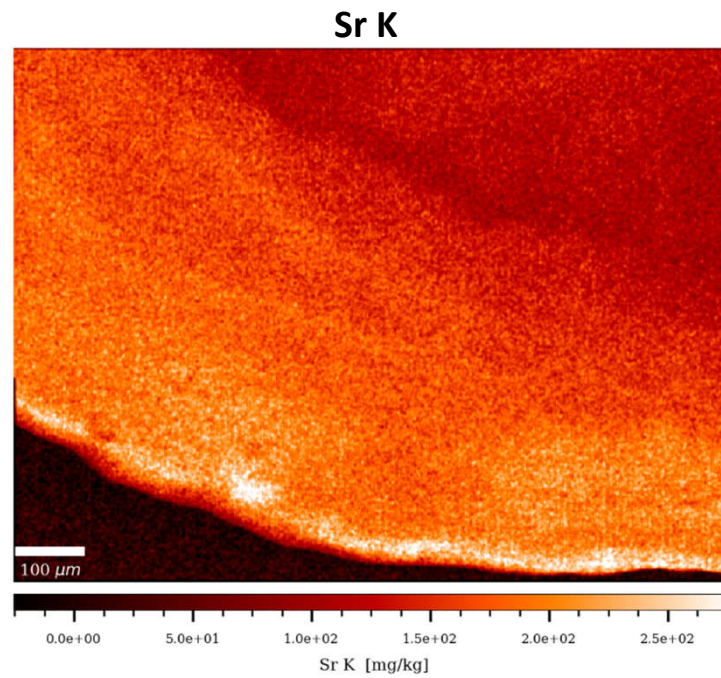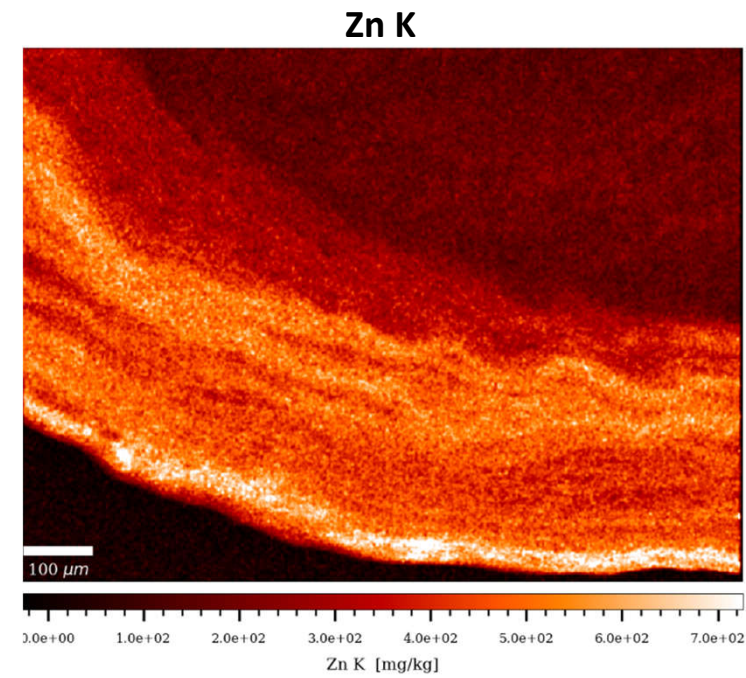



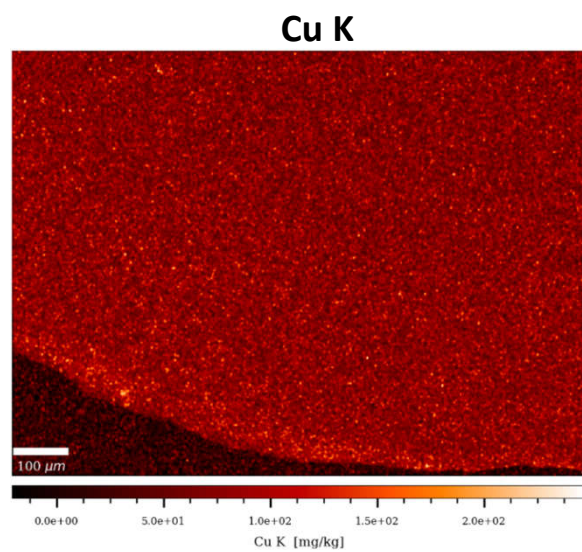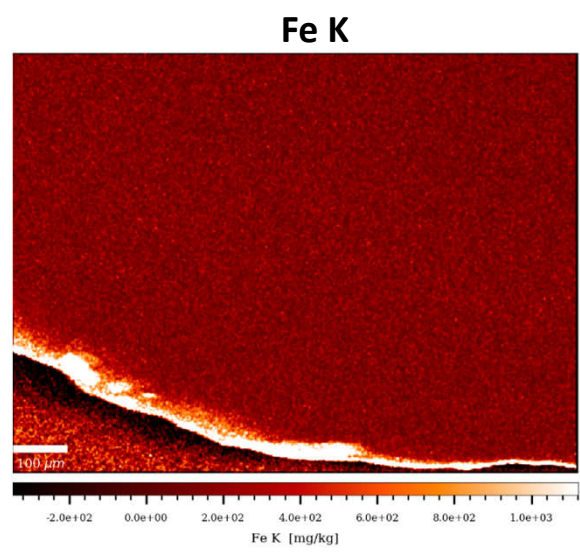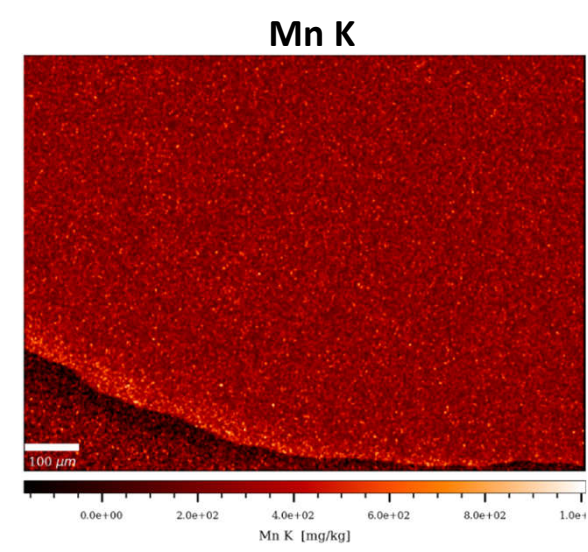

Supplement: s1 [file s1]
